# Supplementary material
Source: publisher figshare collection journal article supplement (https://acs.figshare.com/ndownloader/files/4855279)
Supplement: Supplementary file 1 [file 4855279]

 
data_13174
 
_audit_creation_method            'SHELXL-2014/7'
_shelx_SHELXL_version_number      '2014/7'
_chemical_name_systematic         ?
_chemical_name_common             ?
_chemical_melting_point           ?
_chemical_formula_moiety          'C40 H48 O8 Si4, 0.34(N2)'
_chemical_formula_sum             'C40 H48 N0.68 O8 Si4' 
_chemical_formula_weight          778.67

loop_
 _atom_type_symbol
 _atom_type_description
 _atom_type_scat_dispersion_real
 _atom_type_scat_dispersion_imag
 _atom_type_scat_source
 'C'  'C'   0.0033   0.0016
 'International Tables Vol C Tables 4.2.6.8 and 6.1.1.4'
 'H'  'H'   0.0000   0.0000
 'International Tables Vol C Tables 4.2.6.8 and 6.1.1.4'
 'N'  'N'   0.0061   0.0033
 'International Tables Vol C Tables 4.2.6.8 and 6.1.1.4'
 'O'  'O'   0.0106   0.0060
 'International Tables Vol C Tables 4.2.6.8 and 6.1.1.4'
 'Si'  'Si'   0.0817   0.0704
 'International Tables Vol C Tables 4.2.6.8 and 6.1.1.4'
 
_space_group_crystal_system       monoclinic
_space_group_IT_number            15
_space_group_name_H-M_alt         'C 2/c'
_space_group_name_Hall            '-C 2yc'
 
_shelx_space_group_comment
;
The symmetry employed for this shelxl refinement is uniquely defined
by the following loop, which should always be used as a source of
symmetry information in preference to the above space-group names.
They are only intended as comments.
;
 
loop_
 _space_group_symop_operation_xyz
 'x, y, z'
 '-x, y, -z+1/2'
 'x+1/2, y+1/2, z'
 '-x+1/2, y+1/2, -z+1/2'
 '-x, -y, -z'
 'x, -y, z-1/2'
 '-x+1/2, -y+1/2, -z'
 'x+1/2, -y+1/2, z-1/2'
 
_cell_length_a                    23.873(5)
_cell_length_b                    8.3386(18)
_cell_length_c                    42.097(9)
_cell_angle_alpha                 90
_cell_angle_beta                  100.330(3)
_cell_angle_gamma                 90
_cell_volume                      8244(3)
_cell_formula_units_Z             8
_cell_measurement_temperature     100(2)
_cell_measurement_reflns_used     5715
_cell_measurement_theta_min       2.38
_cell_measurement_theta_max       26.86
 
_exptl_crystal_description        prism
_exptl_crystal_colour             colorless
_exptl_crystal_density_meas       ?
_exptl_crystal_density_method     ?
_exptl_crystal_density_diffrn     1.255          
_exptl_crystal_F_000              3302
_exptl_transmission_factor_min    0.5497
_exptl_transmission_factor_max    0.7457
_exptl_crystal_size_max           0.370
_exptl_crystal_size_mid           0.210
_exptl_crystal_size_min           0.130
_exptl_absorpt_coefficient_mu     0.194
_shelx_estimated_absorpt_T_min    0.932
_shelx_estimated_absorpt_T_max    0.975
_exptl_absorpt_correction_type    'multi-scan'
_exptl_absorpt_correction_T_min   ?
_exptl_absorpt_correction_T_max   ?
_exptl_absorpt_process_details    '(SADABS, Bruker, 2001)'
_exptl_absorpt_special_details    ?
_diffrn_ambient_temperature       100(2)
_diffrn_radiation_wavelength      0.71073
_diffrn_radiation_type            MoK\a
_diffrn_source                    'fine-focus sealed tube' 
_diffrn_measurement_device_type   'Siemens SMART, Bruker APEXII CCD' 
_diffrn_measurement_method        '\f and \w scans'
_diffrn_detector_area_resol_mean  ?
_diffrn_reflns_number             30323
_diffrn_reflns_av_unetI/netI      0.0599
_diffrn_reflns_av_R_equivalents   0.0614
_diffrn_reflns_limit_h_min        -31
_diffrn_reflns_limit_h_max        30
_diffrn_reflns_limit_k_min        -10
_diffrn_reflns_limit_k_max        10
_diffrn_reflns_limit_l_min        -54
_diffrn_reflns_limit_l_max        53
_diffrn_reflns_theta_min          1.734
_diffrn_reflns_theta_max          27.990
_diffrn_reflns_theta_full         25.000
_diffrn_measured_fraction_theta_max   0.960
_diffrn_measured_fraction_theta_full  0.998
_diffrn_reflns_Laue_measured_fraction_max    0.960
_diffrn_reflns_Laue_measured_fraction_full   0.998
_diffrn_reflns_point_group_measured_fraction_max   0.960
_diffrn_reflns_point_group_measured_fraction_full  0.998
_reflns_number_total              9540
_reflns_number_gt                 7087
_reflns_threshold_expression      'I > 2\s(I)'
_reflns_Friedel_coverage          0.000
_reflns_Friedel_fraction_max      .
_reflns_Friedel_fraction_full     .
 
_reflns_special_details
;
 Reflections were merged by SHELXL according to the crystal
 class for the calculation of statistics and refinement.
 
 _reflns_Friedel_fraction is defined as the number of unique
 Friedel pairs measured divided by the number that would be
 possible theoretically, ignoring centric projections and
 systematic absences.
;
 
_computing_data_collection        'SMART (Bruker, 2001)' 
_computing_cell_refinement        'SAINT, Bruker 2001' 
_computing_data_reduction         'SAINT'  
_computing_structure_solution     'SHELXS-97 (Sheldrick, 2008)'
_computing_structure_refinement   'SHELXL-2014/7 (Sheldrick, 2014)'
_computing_molecular_graphics     'X-SEED (Barbour, 2001)' 
_computing_publication_material   'X-SEED and POV-RAY'

_refine_special_details           ?
_refine_ls_structure_factor_coef  Fsqd
_refine_ls_matrix_type            full
_refine_ls_weighting_scheme       calc
_refine_ls_weighting_details
'w=1/[\s^2^(Fo^2^)+(0.0724P)^2^+2.3278P] where P=(Fo^2^+2Fc^2^)/3'
_atom_sites_solution_primary      ?
_atom_sites_solution_secondary    ?
_atom_sites_solution_hydrogens    geom
_refine_ls_hydrogen_treatment     constr
_refine_ls_extinction_method      none
_refine_ls_extinction_coef        .
_refine_ls_number_reflns          9540
_refine_ls_number_parameters      489
_refine_ls_number_restraints      0
_refine_ls_R_factor_all           0.0771
_refine_ls_R_factor_gt            0.0536
_refine_ls_wR_factor_ref          0.1367
_refine_ls_wR_factor_gt           0.1271
_refine_ls_goodness_of_fit_ref    1.036
_refine_ls_restrained_S_all       1.036
_refine_ls_shift/su_max           0.000
_refine_ls_shift/su_mean          0.000
 
loop_
 _atom_site_label
 _atom_site_type_symbol
 _atom_site_fract_x
 _atom_site_fract_y
 _atom_site_fract_z
 _atom_site_U_iso_or_equiv
 _atom_site_adp_type
 _atom_site_occupancy
 _atom_site_site_symmetry_order  
 _atom_site_calc_flag
 _atom_site_refinement_flags_posn
 _atom_site_refinement_flags_adp
 _atom_site_refinement_flags_occupancy
 _atom_site_disorder_assembly
 _atom_site_disorder_group
Si1 Si 0.37926(3) 0.27616(8) 0.22222(2) 0.02081(15) Uani 1 1 d . . . . .
Si2 Si 0.41093(3) 0.08172(7) 0.07037(2) 0.01885(14) Uani 1 1 d . . . . .
Si3 Si 0.11121(3) -0.00867(7) 0.04019(2) 0.02264(15) Uani 1 1 d . . . . .
Si4 Si 0.08531(3) 0.23082(8) 0.18852(2) 0.02219(15) Uani 1 1 d . . . . .
O1 O 0.15652(6) 0.07062(18) 0.01952(3) 0.0193(3) Uani 1 1 d . . . . .
O2 O 0.04821(6) 0.30171(19) 0.15447(4) 0.0233(3) Uani 1 1 d . . . . .
O3 O 0.43784(6) 0.23910(18) 0.09154(3) 0.0187(3) Uani 1 1 d . . . . .
O4 O 0.35819(6) 0.13523(17) 0.04160(3) 0.0175(3) Uani 1 1 d . . . . .
O5 O 0.33099(6) 0.40171(18) 0.23124(3) 0.0210(3) Uani 1 1 d . . . . .
O6 O 0.12825(6) 0.37071(18) 0.20682(4) 0.0216(3) Uani 1 1 d . . . . .
O7 O 0.06526(6) 0.12585(19) 0.04847(4) 0.0224(3) Uani 1 1 d . . . . .
O8 O 0.41970(6) 0.36843(19) 0.19983(3) 0.0210(3) Uani 1 1 d . . . . .
C9 C 0.24418(9) 0.4146(2) 0.05099(5) 0.0159(4) Uani 1 1 d . . . . .
H9 H 0.2396 0.5219 0.0576 0.019 Uiso 1 1 calc R U . . .
C10 C 0.34779(8) 0.5337(2) 0.12232(5) 0.0159(4) Uani 1 1 d . . . . .
H10 H 0.3204 0.6134 0.1143 0.019 Uiso 1 1 calc R U . . .
C11 C 0.20363(9) 0.1649(2) 0.03153(5) 0.0155(4) Uani 1 1 d . . . . .
C12 C 0.22881(9) 0.5917(2) 0.16718(5) 0.0175(4) Uani 1 1 d . . . . .
H12 H 0.2284 0.6647 0.1498 0.021 Uiso 1 1 calc R U . . .
C13 C 0.28032(9) 0.4421(3) 0.21101(5) 0.0192(4) Uani 1 1 d . . . . .
C14 C 0.19568(9) 0.3229(2) 0.04037(5) 0.0154(4) Uani 1 1 d . . . . .
C15 C 0.33647(9) 0.6183(2) 0.17852(5) 0.0177(4) Uani 1 1 d . . . . .
H15A H 0.3290 0.7263 0.1689 0.021 Uiso 1 1 calc R U . . .
H15B H 0.3638 0.6305 0.1990 0.021 Uiso 1 1 calc R U . . .
C16 C 0.22980(9) 0.3807(3) 0.21845(5) 0.0198(4) Uani 1 1 d . . . . .
C17 C 0.41130(9) 0.3264(3) 0.11268(5) 0.0170(4) Uani 1 1 d . . . . .
C18 C 0.42847(9) 0.3017(3) 0.14580(5) 0.0190(4) Uani 1 1 d . . . . .
C19 C 0.12157(9) 0.5753(3) 0.15138(5) 0.0182(4) Uani 1 1 d . . . . .
H19A H 0.1249 0.6838 0.1423 0.022 Uiso 1 1 calc R U . . .
H19B H 0.0910 0.5787 0.1645 0.022 Uiso 1 1 calc R U . . .
C20 C 0.13682(9) 0.3940(2) 0.03878(5) 0.0171(4) Uani 1 1 d . . . . .
H20A H 0.1385 0.5106 0.0346 0.020 Uiso 1 1 calc R U . . .
H20B H 0.1106 0.3452 0.0205 0.020 Uiso 1 1 calc R U . . .
C21 C 0.17878(9) 0.4258(3) 0.19887(5) 0.0185(4) Uani 1 1 d . . . . .
C22 C 0.07039(9) 0.3244(3) 0.12634(5) 0.0195(4) Uani 1 1 d . . . . .
C23 C 0.28110(9) 0.5496(2) 0.18576(5) 0.0167(4) Uani 1 1 d . . . . .
C24 C 0.35037(9) 0.4610(2) 0.06425(5) 0.0163(4) Uani 1 1 d . . . . .
H24A H 0.3816 0.4321 0.0527 0.020 Uiso 1 1 calc R U . . .
H24B H 0.3403 0.5746 0.0594 0.020 Uiso 1 1 calc R U . . .
C25 C 0.11337(9) 0.3677(3) 0.06951(5) 0.0167(4) Uani 1 1 d . . . . .
C26 C 0.17719(9) 0.5317(2) 0.17293(5) 0.0172(4) Uani 1 1 d . . . . .
C27 C 0.25770(9) 0.0979(2) 0.03292(5) 0.0165(4) Uani 1 1 d . . . . .
C28 C 0.12572(9) 0.4754(2) 0.09509(5) 0.0167(4) Uani 1 1 d . . . . .
H28 H 0.1492 0.5652 0.0929 0.020 Uiso 1 1 calc R U . . .
C29 C 0.37070(9) 0.4415(2) 0.10025(5) 0.0157(4) Uani 1 1 d . . . . .
C30 C 0.29900(9) 0.3559(2) 0.05228(5) 0.0148(4) Uani 1 1 d . . . . .
C31 C 0.36321(9) 0.5146(2) 0.15563(5) 0.0164(4) Uani 1 1 d . . . . .
C32 C 0.26460(9) -0.0741(2) 0.02338(5) 0.0202(4) Uani 1 1 d . . . . .
H32A H 0.2674 -0.1429 0.0425 0.030 Uiso 1 1 calc R U . . .
H32B H 0.2993 -0.0848 0.0141 0.030 Uiso 1 1 calc R U . . .
H32C H 0.2316 -0.1064 0.0073 0.030 Uiso 1 1 calc R U . . .
C33 C 0.40297(9) 0.3949(3) 0.16684(5) 0.0183(4) Uani 1 1 d . . . . .
C34 C 0.30490(9) 0.1966(2) 0.04306(5) 0.0158(4) Uani 1 1 d . . . . .
C35 C 0.10509(9) 0.4570(2) 0.12385(5) 0.0168(4) Uani 1 1 d . . . . .
C36 C 0.05584(9) 0.2137(3) 0.10136(5) 0.0217(5) Uani 1 1 d . . . . .
C37 C 0.07891(9) 0.2368(3) 0.07340(5) 0.0190(4) Uani 1 1 d . . . . .
C38 C 0.01587(10) 0.0767(3) 0.10406(6) 0.0296(5) Uani 1 1 d . . . . .
H38A H 0.0379 -0.0201 0.1110 0.044 Uiso 1 1 calc R U . . .
H38B H -0.0083 0.0575 0.0830 0.044 Uiso 1 1 calc R U . . .
H38C H -0.0081 0.1036 0.1199 0.044 Uiso 1 1 calc R U . . .
C39 C 0.34391(12) 0.1017(3) 0.20012(7) 0.0373(6) Uani 1 1 d . . . . .
H39A H 0.3204 0.0469 0.2136 0.056 Uiso 1 1 calc R U . . .
H39B H 0.3728 0.0274 0.1949 0.056 Uiso 1 1 calc R U . . .
H39C H 0.3198 0.1382 0.1801 0.056 Uiso 1 1 calc R U . . .
C40 C 0.42549(11) 0.2288(3) 0.26095(6) 0.0313(6) Uani 1 1 d . . . . .
H40A H 0.4474 0.3242 0.2691 0.047 Uiso 1 1 calc R U . . .
H40B H 0.4517 0.1421 0.2578 0.047 Uiso 1 1 calc R U . . .
H40C H 0.4020 0.1947 0.2766 0.047 Uiso 1 1 calc R U . . .
C41 C 0.07009(12) -0.1556(3) 0.01304(8) 0.0431(7) Uani 1 1 d . . . . .
H41A H 0.0474 -0.0997 -0.0054 0.065 Uiso 1 1 calc R U . . .
H41B H 0.0447 -0.2147 0.0247 0.065 Uiso 1 1 calc R U . . .
H41C H 0.0962 -0.2307 0.0053 0.065 Uiso 1 1 calc R U . . .
C42 C 0.15161(12) -0.0882(3) 0.07871(6) 0.0359(6) Uani 1 1 d . . . . .
H42A H 0.1791 -0.1685 0.0741 0.054 Uiso 1 1 calc R U . . .
H42B H 0.1252 -0.1380 0.0911 0.054 Uiso 1 1 calc R U . . .
H42C H 0.1719 -0.0003 0.0913 0.054 Uiso 1 1 calc R U . . .
C43 C 0.23073(10) 0.2701(3) 0.24692(5) 0.0272(5) Uani 1 1 d . . . . .
H43A H 0.1930 0.2681 0.2530 0.041 Uiso 1 1 calc R U . . .
H43B H 0.2588 0.3087 0.2652 0.041 Uiso 1 1 calc R U . . .
H43C H 0.2410 0.1616 0.2411 0.041 Uiso 1 1 calc R U . . .
C44 C 0.46724(10) 0.0114(3) 0.04939(6) 0.0335(6) Uani 1 1 d . . . . .
H44A H 0.4575 -0.0954 0.0404 0.050 Uiso 1 1 calc R U . . .
H44B H 0.5033 0.0060 0.0647 0.050 Uiso 1 1 calc R U . . .
H44C H 0.4710 0.0860 0.0319 0.050 Uiso 1 1 calc R U . . .
C45 C 0.12752(12) 0.0552(3) 0.18014(6) 0.0336(6) Uani 1 1 d . . . . .
H45A H 0.1544 0.0876 0.1663 0.050 Uiso 1 1 calc R U . . .
H45B H 0.1020 -0.0276 0.1692 0.050 Uiso 1 1 calc R U . . .
H45C H 0.1485 0.0124 0.2005 0.050 Uiso 1 1 calc R U . . .
C46 C 0.03277(11) 0.1944(3) 0.21479(6) 0.0337(6) Uani 1 1 d . . . . .
H46A H 0.0523 0.1565 0.2359 0.051 Uiso 1 1 calc R U . . .
H46B H 0.0055 0.1130 0.2049 0.051 Uiso 1 1 calc R U . . .
H46C H 0.0125 0.2943 0.2175 0.051 Uiso 1 1 calc R U . . .
C47 C 0.47366(10) 0.1801(3) 0.15848(5) 0.0284(5) Uani 1 1 d . . . . .
H47A H 0.4557 0.0835 0.1653 0.043 Uiso 1 1 calc R U . . .
H47B H 0.4996 0.2254 0.1770 0.043 Uiso 1 1 calc R U . . .
H47C H 0.4951 0.1525 0.1414 0.043 Uiso 1 1 calc R U . . .
C48 C 0.38546(13) -0.0645(3) 0.09726(6) 0.0397(7) Uani 1 1 d . . . . .
H48A H 0.3559 -0.0151 0.1074 0.060 Uiso 1 1 calc R U . . .
H48B H 0.4173 -0.0982 0.1140 0.060 Uiso 1 1 calc R U . . .
H48C H 0.3697 -0.1582 0.0847 0.060 Uiso 1 1 calc R U . . .
N1 N 0.2365(4) 0.2227(12) 0.1283(2) 0.067(2) Uiso 0.34 1 d . . P . .
N2 N 0.2667(5) 0.1714(14) 0.1219(3) 0.082(3) Uiso 0.34 1 d . . P . .
 
loop_
 _atom_site_aniso_label
 _atom_site_aniso_U_11
 _atom_site_aniso_U_22
 _atom_site_aniso_U_33
 _atom_site_aniso_U_23
 _atom_site_aniso_U_13
 _atom_site_aniso_U_12
Si1 0.0197(3) 0.0214(3) 0.0201(3) 0.0003(2) 0.0003(2) 0.0008(2)
Si2 0.0194(3) 0.0172(3) 0.0189(3) -0.0015(2) 0.0002(2) 0.0020(2)
Si3 0.0224(3) 0.0179(3) 0.0272(3) -0.0046(3) 0.0033(3) -0.0059(2)
Si4 0.0230(3) 0.0225(3) 0.0232(3) 0.0013(2) 0.0096(3) -0.0021(2)
O1 0.0177(8) 0.0180(8) 0.0206(7) -0.0030(6) -0.0010(6) -0.0031(6)
O2 0.0201(8) 0.0278(9) 0.0235(8) 0.0005(7) 0.0082(6) -0.0020(6)
O3 0.0150(7) 0.0208(8) 0.0202(7) -0.0043(6) 0.0028(6) -0.0001(6)
O4 0.0150(7) 0.0173(7) 0.0201(7) -0.0022(6) 0.0025(6) 0.0027(6)
O5 0.0186(8) 0.0259(8) 0.0171(7) 0.0000(6) -0.0007(6) 0.0008(6)
O6 0.0199(8) 0.0238(8) 0.0226(8) 0.0013(6) 0.0079(6) -0.0002(6)
O7 0.0170(8) 0.0247(8) 0.0248(8) -0.0069(7) 0.0012(6) -0.0048(6)
O8 0.0190(8) 0.0269(8) 0.0156(7) -0.0014(6) -0.0013(6) -0.0003(6)
C9 0.0211(11) 0.0116(10) 0.0146(9) -0.0007(8) 0.0025(8) -0.0015(8)
C10 0.0125(10) 0.0136(10) 0.0209(10) 0.0000(8) 0.0008(8) -0.0036(7)
C11 0.0175(10) 0.0152(10) 0.0126(9) -0.0004(8) -0.0002(8) -0.0029(8)
C12 0.0218(11) 0.0137(10) 0.0173(10) -0.0024(8) 0.0048(8) 0.0008(8)
C13 0.0202(11) 0.0199(11) 0.0164(10) -0.0043(8) 0.0008(8) 0.0025(8)
C14 0.0170(10) 0.0162(10) 0.0128(9) 0.0024(8) 0.0024(8) 0.0017(8)
C15 0.0187(11) 0.0157(10) 0.0181(10) -0.0030(8) 0.0013(8) -0.0022(8)
C16 0.0248(12) 0.0168(10) 0.0180(10) -0.0008(8) 0.0044(9) 0.0014(9)
C17 0.0143(10) 0.0180(10) 0.0185(10) -0.0047(8) 0.0027(8) -0.0032(8)
C18 0.0139(10) 0.0203(11) 0.0214(10) -0.0015(9) -0.0004(8) -0.0006(8)
C19 0.0188(11) 0.0162(10) 0.0202(10) 0.0015(8) 0.0054(8) 0.0019(8)
C20 0.0157(10) 0.0157(10) 0.0180(10) 0.0012(8) -0.0020(8) 0.0015(8)
C21 0.0192(11) 0.0180(11) 0.0202(10) -0.0022(8) 0.0087(9) -0.0003(8)
C22 0.0148(10) 0.0235(11) 0.0206(10) 0.0025(9) 0.0042(8) 0.0012(8)
C23 0.0183(11) 0.0142(10) 0.0179(10) -0.0058(8) 0.0038(8) -0.0004(8)
C24 0.0184(11) 0.0135(10) 0.0171(10) -0.0006(8) 0.0032(8) -0.0008(8)
C25 0.0125(10) 0.0180(10) 0.0190(10) 0.0040(8) 0.0010(8) 0.0030(8)
C26 0.0194(11) 0.0149(10) 0.0172(10) -0.0026(8) 0.0028(8) 0.0024(8)
C27 0.0207(11) 0.0136(10) 0.0143(9) -0.0022(8) 0.0011(8) 0.0005(8)
C28 0.0146(10) 0.0133(10) 0.0215(10) 0.0017(8) 0.0017(8) 0.0019(8)
C29 0.0142(10) 0.0163(10) 0.0165(9) -0.0007(8) 0.0025(8) -0.0049(8)
C30 0.0177(10) 0.0151(10) 0.0114(9) 0.0010(8) 0.0022(8) -0.0021(8)
C31 0.0134(10) 0.0159(10) 0.0203(10) -0.0026(8) 0.0039(8) -0.0040(8)
C32 0.0209(11) 0.0160(10) 0.0228(11) -0.0033(9) 0.0014(9) -0.0005(8)
C33 0.0150(10) 0.0224(11) 0.0158(10) -0.0025(8) -0.0014(8) -0.0034(8)
C34 0.0170(10) 0.0167(10) 0.0137(9) 0.0005(8) 0.0027(8) 0.0012(8)
C35 0.0146(10) 0.0165(10) 0.0186(10) 0.0004(8) 0.0007(8) 0.0032(8)
C36 0.0149(11) 0.0229(11) 0.0273(11) 0.0012(9) 0.0037(9) -0.0026(8)
C37 0.0152(10) 0.0203(11) 0.0205(10) -0.0025(9) 0.0002(8) -0.0007(8)
C38 0.0266(13) 0.0312(13) 0.0321(13) -0.0031(11) 0.0079(10) -0.0112(10)
C39 0.0332(15) 0.0297(14) 0.0504(16) -0.0102(12) 0.0114(13) -0.0044(11)
C40 0.0260(13) 0.0409(15) 0.0260(12) 0.0102(11) 0.0026(10) 0.0051(11)
C41 0.0332(15) 0.0368(15) 0.0604(19) -0.0246(14) 0.0117(14) -0.0150(12)
C42 0.0473(17) 0.0251(13) 0.0363(14) 0.0110(11) 0.0102(12) 0.0049(11)
C43 0.0266(13) 0.0321(13) 0.0236(11) 0.0091(10) 0.0063(10) 0.0027(10)
C44 0.0215(13) 0.0423(15) 0.0336(13) -0.0152(12) -0.0031(10) 0.0109(11)
C45 0.0425(16) 0.0262(13) 0.0326(13) 0.0015(11) 0.0076(12) 0.0032(11)
C46 0.0308(14) 0.0419(15) 0.0323(13) -0.0022(12) 0.0161(11) -0.0097(12)
C47 0.0238(12) 0.0380(14) 0.0212(11) -0.0040(10) -0.0017(9) 0.0108(10)
C48 0.0566(18) 0.0257(14) 0.0323(14) 0.0058(11) -0.0046(13) -0.0143(12)
 
_geom_special_details
;
 All esds (except the esd in the dihedral angle between two l.s. planes)
 are estimated using the full covariance matrix.  The cell esds are taken
 into account individually in the estimation of esds in distances, angles
 and torsion angles; correlations between esds in cell parameters are only
 used when they are defined by crystal symmetry.  An approximate (isotropic)
 treatment of cell esds is used for estimating esds involving l.s. planes.
;
 
loop_
 _geom_bond_atom_site_label_1
 _geom_bond_atom_site_label_2
 _geom_bond_distance
 _geom_bond_site_symmetry_2
 _geom_bond_publ_flag
Si1 O5 1.6507(16) . ?
Si1 O8 1.6550(16) . ?
Si1 C40 1.840(2) . ?
Si1 C39 1.847(3) . ?
Si2 O4 1.6445(15) . ?
Si2 O3 1.6506(16) . ?
Si2 C44 1.832(2) . ?
Si2 C48 1.840(3) . ?
Si3 O1 1.6435(16) . ?
Si3 O7 1.6493(17) . ?
Si3 C41 1.835(3) . ?
Si3 C42 1.854(3) . ?
Si4 O6 1.6497(17) . ?
Si4 O2 1.6533(17) . ?
Si4 C46 1.840(2) . ?
Si4 C45 1.847(3) . ?
O1 C11 1.391(2) . ?
O2 C22 1.394(2) . ?
O3 C17 1.387(2) . ?
O4 C34 1.383(2) . ?
O5 C13 1.390(3) . ?
O6 C21 1.387(3) . ?
O7 C37 1.394(3) . ?
O8 C33 1.392(2) . ?
C9 C30 1.389(3) . ?
C9 C14 1.393(3) . ?
C10 C29 1.392(3) . ?
C10 C31 1.394(3) . ?
C11 C14 1.391(3) . ?
C11 C27 1.398(3) . ?
C12 C26 1.391(3) . ?
C12 C23 1.394(3) . ?
C13 C23 1.393(3) . ?
C13 C16 1.397(3) . ?
C14 C20 1.516(3) . ?
C15 C31 1.518(3) . ?
C15 C23 1.521(3) . ?
C16 C21 1.394(3) . ?
C16 C43 1.509(3) . ?
C17 C18 1.396(3) . ?
C17 C29 1.397(3) . ?
C18 C33 1.398(3) . ?
C18 C47 1.507(3) . ?
C19 C26 1.512(3) . ?
C19 C35 1.519(3) . ?
C20 C25 1.515(3) . ?
C21 C26 1.399(3) . ?
C22 C36 1.395(3) . ?
C22 C35 1.397(3) . ?
C24 C29 1.515(3) . ?
C24 C30 1.518(3) . ?
C25 C28 1.393(3) . ?
C25 C37 1.394(3) . ?
C27 C34 1.399(3) . ?
C27 C32 1.506(3) . ?
C28 C35 1.395(3) . ?
C30 C34 1.398(3) . ?
C31 C33 1.399(3) . ?
C36 C37 1.399(3) . ?
C36 C38 1.506(3) . ?
N1 N2 0.918(12) . ?
 
loop_
 _geom_angle_atom_site_label_1
 _geom_angle_atom_site_label_2
 _geom_angle_atom_site_label_3
 _geom_angle
 _geom_angle_site_symmetry_1
 _geom_angle_site_symmetry_3
 _geom_angle_publ_flag
O5 Si1 O8 109.80(8) . . ?
O5 Si1 C40 105.38(10) . . ?
O8 Si1 C40 106.61(10) . . ?
O5 Si1 C39 109.91(10) . . ?
O8 Si1 C39 109.86(11) . . ?
C40 Si1 C39 115.11(13) . . ?
O4 Si2 O3 110.77(8) . . ?
O4 Si2 C44 105.25(10) . . ?
O3 Si2 C44 105.46(10) . . ?
O4 Si2 C48 109.83(11) . . ?
O3 Si2 C48 109.52(10) . . ?
C44 Si2 C48 115.88(14) . . ?
O1 Si3 O7 111.35(8) . . ?
O1 Si3 C41 105.56(11) . . ?
O7 Si3 C41 106.49(11) . . ?
O1 Si3 C42 108.56(11) . . ?
O7 Si3 C42 108.64(10) . . ?
C41 Si3 C42 116.23(14) . . ?
O6 Si4 O2 110.09(8) . . ?
O6 Si4 C46 105.64(10) . . ?
O2 Si4 C46 105.26(11) . . ?
O6 Si4 C45 109.58(11) . . ?
O2 Si4 C45 110.10(10) . . ?
C46 Si4 C45 115.97(13) . . ?
C11 O1 Si3 126.95(13) . . ?
C22 O2 Si4 123.99(14) . . ?
C17 O3 Si2 125.80(13) . . ?
C34 O4 Si2 131.03(13) . . ?
C13 O5 Si1 125.43(13) . . ?
C21 O6 Si4 128.06(13) . . ?
C37 O7 Si3 122.44(13) . . ?
C33 O8 Si1 123.35(13) . . ?
C30 C9 C14 122.86(19) . . ?
C29 C10 C31 122.9(2) . . ?
O1 C11 C14 119.48(18) . . ?
O1 C11 C27 118.04(18) . . ?
C14 C11 C27 122.42(19) . . ?
C26 C12 C23 122.9(2) . . ?
O5 C13 C23 119.61(19) . . ?
O5 C13 C16 117.72(19) . . ?
C23 C13 C16 122.5(2) . . ?
C11 C14 C9 117.41(19) . . ?
C11 C14 C20 121.92(19) . . ?
C9 C14 C20 120.67(18) . . ?
C31 C15 C23 113.05(16) . . ?
C21 C16 C13 117.80(19) . . ?
C21 C16 C43 121.4(2) . . ?
C13 C16 C43 120.8(2) . . ?
O3 C17 C18 118.48(19) . . ?
O3 C17 C29 119.09(18) . . ?
C18 C17 C29 122.34(19) . . ?
C17 C18 C33 117.9(2) . . ?
C17 C18 C47 121.10(19) . . ?
C33 C18 C47 121.01(19) . . ?
C26 C19 C35 112.40(17) . . ?
C25 C20 C14 112.79(16) . . ?
O6 C21 C16 118.26(19) . . ?
O6 C21 C26 119.62(19) . . ?
C16 C21 C26 122.0(2) . . ?
O2 C22 C36 117.99(19) . . ?
O2 C22 C35 119.44(19) . . ?
C36 C22 C35 122.55(19) . . ?
C13 C23 C12 117.20(19) . . ?
C13 C23 C15 121.78(19) . . ?
C12 C23 C15 121.01(19) . . ?
C29 C24 C30 111.40(16) . . ?
C28 C25 C37 117.48(19) . . ?
C28 C25 C20 120.50(19) . . ?
C37 C25 C20 122.02(19) . . ?
C12 C26 C21 117.5(2) . . ?
C12 C26 C19 121.26(19) . . ?
C21 C26 C19 121.20(19) . . ?
C11 C27 C34 117.72(18) . . ?
C11 C27 C32 120.88(19) . . ?
C34 C27 C32 121.39(19) . . ?
C25 C28 C35 122.79(19) . . ?
C10 C29 C17 117.33(18) . . ?
C10 C29 C24 120.97(19) . . ?
C17 C29 C24 121.65(18) . . ?
C9 C30 C34 117.70(19) . . ?
C9 C30 C24 120.62(18) . . ?
C34 C30 C24 121.66(18) . . ?
C10 C31 C33 117.50(19) . . ?
C10 C31 C15 120.52(19) . . ?
C33 C31 C15 121.97(18) . . ?
O8 C33 C18 117.66(19) . . ?
O8 C33 C31 120.36(18) . . ?
C18 C33 C31 121.95(19) . . ?
O4 C34 C30 120.22(18) . . ?
O4 C34 C27 117.76(18) . . ?
C30 C34 C27 121.87(19) . . ?
C28 C35 C22 117.29(19) . . ?
C28 C35 C19 120.48(19) . . ?
C22 C35 C19 122.21(18) . . ?
C22 C36 C37 117.4(2) . . ?
C22 C36 C38 121.4(2) . . ?
C37 C36 C38 121.2(2) . . ?
O7 C37 C25 119.64(19) . . ?
O7 C37 C36 117.88(19) . . ?
C25 C37 C36 122.5(2) . . ?
 
_refine_diff_density_max    0.667
_refine_diff_density_min   -0.390
_refine_diff_density_rms    0.068

_shelx_res_file
;

    C:\Users\CK\Desktop\SILYLC~1\MeHSiMe2\07DA5~1.34(\work\13174.res created by SHELXL-2014/7

TITL 13174 in C2/c
CELL 0.71073 23.8734 8.3386 42.0966 90.000 100.330 90.000
ZERR 8.0000 0.0051 0.0018 0.0090 0.000 0.003 0.000
LATT 7
SYMM -X, Y, 0.5-Z
SFAC C H N O SI
UNIT 320 384 5.44 64 32
MERG 2
OMIT 0 56
FMAP 2
GRID
PLAN 20
TEMP -173
SIZE 0.37 0.21 0.13
OMIT   0 0 2
L.S. 20
ACTA 50
WGHT    0.072400    2.327800
FVAR       0.05078
SI1   5    0.379256    0.276163    0.222223    11.00000    0.01971    0.02142 =
         0.02009    0.00035    0.00030    0.00079
SI2   5    0.410927    0.081717    0.070366    11.00000    0.01935    0.01715 =
         0.01885   -0.00149    0.00019    0.00196
SI3   5    0.111210   -0.008669    0.040185    11.00000    0.02241    0.01791 =
         0.02720   -0.00456    0.00334   -0.00591
SI4   5    0.085311    0.230825    0.188521    11.00000    0.02300    0.02247 =
         0.02316    0.00133    0.00965   -0.00207
O1    4    0.156521    0.070618    0.019525    11.00000    0.01771    0.01797 =
         0.02060   -0.00300   -0.00102   -0.00310
O2    4    0.048209    0.301708    0.154468    11.00000    0.02008    0.02778 =
         0.02350    0.00055    0.00817   -0.00196
O3    4    0.437844    0.239097    0.091545    11.00000    0.01498    0.02078 =
         0.02016   -0.00429    0.00282   -0.00009
O4    4    0.358188    0.135227    0.041595    11.00000    0.01498    0.01727 =
         0.02008   -0.00223    0.00251    0.00269
O5    4    0.330986    0.401710    0.231236    11.00000    0.01860    0.02595 =
         0.01715    0.00000   -0.00069    0.00077
O6    4    0.128252    0.370708    0.206815    11.00000    0.01989    0.02376 =
         0.02262    0.00130    0.00785   -0.00018
O7    4    0.065264    0.125846    0.048471    11.00000    0.01696    0.02468 =
         0.02477   -0.00686    0.00125   -0.00477
O8    4    0.419699    0.368432    0.199832    11.00000    0.01896    0.02688 =
         0.01556   -0.00144   -0.00126   -0.00034
C9    1    0.244182    0.414558    0.050985    11.00000    0.02114    0.01162 =
         0.01458   -0.00067    0.00251   -0.00148
AFIX  43
H9    2    0.239572    0.521895    0.057630    11.00000   -1.20000
AFIX   0
C10   1    0.347788    0.533741    0.122316    11.00000    0.01251    0.01355 =
         0.02087    0.00000    0.00083   -0.00357
AFIX  43
H10   2    0.320412    0.613370    0.114317    11.00000   -1.20000
AFIX   0
C11   1    0.203628    0.164852    0.031532    11.00000    0.01751    0.01519 =
         0.01259   -0.00039   -0.00017   -0.00294
C12   1    0.228806    0.591740    0.167180    11.00000    0.02180    0.01375 =
         0.01727   -0.00235    0.00475    0.00081
AFIX  43
H12   2    0.228410    0.664745    0.149816    11.00000   -1.20000
AFIX   0
C13   1    0.280316    0.442150    0.211007    11.00000    0.02023    0.01987 =
         0.01644   -0.00433    0.00082    0.00253
C14   1    0.195680    0.322853    0.040368    11.00000    0.01703    0.01625 =
         0.01275    0.00245    0.00238    0.00168
C15   1    0.336474    0.618346    0.178516    11.00000    0.01868    0.01567 =
         0.01806   -0.00302    0.00131   -0.00216
AFIX  23
H15A  2    0.328989    0.726327    0.168916    11.00000   -1.20000
H15B  2    0.363837    0.630532    0.199023    11.00000   -1.20000
AFIX   0
C16   1    0.229805    0.380692    0.218446    11.00000    0.02477    0.01680 =
         0.01801   -0.00080    0.00438    0.00144
C17   1    0.411296    0.326366    0.112676    11.00000    0.01430    0.01802 =
         0.01853   -0.00474    0.00272   -0.00318
C18   1    0.428475    0.301695    0.145796    11.00000    0.01394    0.02031 =
         0.02140   -0.00147   -0.00043   -0.00056
C19   1    0.121571    0.575318    0.151376    11.00000    0.01877    0.01622 =
         0.02017    0.00155    0.00535    0.00190
AFIX  23
H19A  2    0.124929    0.683762    0.142329    11.00000   -1.20000
H19B  2    0.091043    0.578711    0.164473    11.00000   -1.20000
AFIX   0
C20   1    0.136817    0.394016    0.038782    11.00000    0.01570    0.01569 =
         0.01798    0.00122   -0.00198    0.00154
AFIX  23
H20A  2    0.138475    0.510616    0.034618    11.00000   -1.20000
H20B  2    0.110550    0.345200    0.020464    11.00000   -1.20000
AFIX   0
C21   1    0.178783    0.425850    0.198873    11.00000    0.01916    0.01805 =
         0.02022   -0.00218    0.00868   -0.00034
C22   1    0.070386    0.324366    0.126336    11.00000    0.01482    0.02353 =
         0.02055    0.00247    0.00419    0.00123
C23   1    0.281104    0.549553    0.185761    11.00000    0.01831    0.01417 =
         0.01785   -0.00583    0.00383   -0.00036
C24   1    0.350373    0.460979    0.064247    11.00000    0.01838    0.01346 =
         0.01715   -0.00059    0.00318   -0.00079
AFIX  23
H24A  2    0.381588    0.432149    0.052686    11.00000   -1.20000
H24B  2    0.340251    0.574615    0.059408    11.00000   -1.20000
AFIX   0
C25   1    0.113367    0.367700    0.069508    11.00000    0.01250    0.01795 =
         0.01904    0.00399    0.00103    0.00299
C26   1    0.177192    0.531703    0.172932    11.00000    0.01940    0.01490 =
         0.01724   -0.00261    0.00278    0.00241
C27   1    0.257702    0.097909    0.032923    11.00000    0.02075    0.01359 =
         0.01431   -0.00222    0.00113    0.00054
C28   1    0.125716    0.475414    0.095089    11.00000    0.01459    0.01334 =
         0.02152    0.00171    0.00169    0.00188
AFIX  43
H28   2    0.149182    0.565233    0.092857    11.00000   -1.20000
AFIX   0
C29   1    0.370703    0.441452    0.100247    11.00000    0.01416    0.01632 =
         0.01650   -0.00074    0.00247   -0.00486
C30   1    0.299001    0.355908    0.052280    11.00000    0.01775    0.01512 =
         0.01138    0.00104    0.00223   -0.00214
C31   1    0.363208    0.514561    0.155633    11.00000    0.01339    0.01585 =
         0.02029   -0.00260    0.00388   -0.00399
C32   1    0.264602   -0.074086    0.023377    11.00000    0.02085    0.01599 =
         0.02277   -0.00330    0.00142   -0.00049
AFIX 137
H32A  2    0.267406   -0.142900    0.042469    11.00000   -1.50000
H32B  2    0.299297   -0.084820    0.014149    11.00000   -1.50000
H32C  2    0.231592   -0.106428    0.007303    11.00000   -1.50000
AFIX   0
C33   1    0.402974    0.394950    0.166839    11.00000    0.01501    0.02240 =
         0.01582   -0.00251   -0.00138   -0.00343
C34   1    0.304901    0.196607    0.043063    11.00000    0.01696    0.01673 =
         0.01374    0.00054    0.00271    0.00115
C35   1    0.105091    0.457014    0.123851    11.00000    0.01456    0.01649 =
         0.01860    0.00043    0.00066    0.00320
C36   1    0.055841    0.213683    0.101360    11.00000    0.01492    0.02292 =
         0.02733    0.00115    0.00374   -0.00256
C37   1    0.078912    0.236849    0.073404    11.00000    0.01520    0.02028 =
         0.02049   -0.00245    0.00025   -0.00074
C38   1    0.015866    0.076709    0.104062    11.00000    0.02657    0.03122 =
         0.03211   -0.00311    0.00790   -0.01121
AFIX 137
H38A  2    0.037948   -0.020132    0.111018    11.00000   -1.50000
H38B  2   -0.008272    0.057524    0.083002    11.00000   -1.50000
H38C  2   -0.008098    0.103588    0.119924    11.00000   -1.50000
AFIX   0
C39   1    0.343906    0.101697    0.200119    11.00000    0.03325    0.02973 =
         0.05040   -0.01022    0.01144   -0.00441
AFIX 137
H39A  2    0.320366    0.046897    0.213588    11.00000   -1.50000
H39B  2    0.372797    0.027435    0.194948    11.00000   -1.50000
H39C  2    0.319802    0.138208    0.180095    11.00000   -1.50000
AFIX   0
C40   1    0.425493    0.228771    0.260947    11.00000    0.02603    0.04094 =
         0.02603    0.01021    0.00258    0.00507
AFIX 137
H40A  2    0.447386    0.324241    0.269101    11.00000   -1.50000
H40B  2    0.451678    0.142150    0.257769    11.00000   -1.50000
H40C  2    0.402037    0.194686    0.276592    11.00000   -1.50000
AFIX   0
C41   1    0.070092   -0.155566    0.013038    11.00000    0.03318    0.03681 =
         0.06041   -0.02459    0.01172   -0.01498
AFIX 137
H41A  2    0.047446   -0.099725   -0.005388    11.00000   -1.50000
H41B  2    0.044684   -0.214711    0.024729    11.00000   -1.50000
H41C  2    0.096186   -0.230707    0.005278    11.00000   -1.50000
AFIX   0
C42   1    0.151608   -0.088234    0.078707    11.00000    0.04733    0.02512 =
         0.03634    0.01103    0.01019    0.00489
AFIX 137
H42A  2    0.179072   -0.168483    0.074118    11.00000   -1.50000
H42B  2    0.125176   -0.137976    0.091098    11.00000   -1.50000
H42C  2    0.171925   -0.000289    0.091261    11.00000   -1.50000
AFIX   0
C43   1    0.230728    0.270058    0.246915    11.00000    0.02661    0.03213 =
         0.02355    0.00906    0.00628    0.00271
AFIX 137
H43A  2    0.192956    0.268070    0.252958    11.00000   -1.50000
H43B  2    0.258807    0.308669    0.265199    11.00000   -1.50000
H43C  2    0.241020    0.161604    0.241072    11.00000   -1.50000
AFIX   0
C44   1    0.467237    0.011411    0.049393    11.00000    0.02152    0.04230 =
         0.03355   -0.01520   -0.00310    0.01095
AFIX 137
H44A  2    0.457459   -0.095408    0.040368    11.00000   -1.50000
H44B  2    0.503349    0.006034    0.064680    11.00000   -1.50000
H44C  2    0.471027    0.085995    0.031912    11.00000   -1.50000
AFIX   0
C45   1    0.127516    0.055192    0.180142    11.00000    0.04246    0.02623 =
         0.03259    0.00152    0.00764    0.00319
AFIX 137
H45A  2    0.154437    0.087601    0.166292    11.00000   -1.50000
H45B  2    0.101959   -0.027560    0.169179    11.00000   -1.50000
H45C  2    0.148544    0.012352    0.200510    11.00000   -1.50000
AFIX   0
C46   1    0.032766    0.194417    0.214794    11.00000    0.03080    0.04191 =
         0.03229   -0.00219    0.01608   -0.00969
AFIX 137
H46A  2    0.052336    0.156506    0.235925    11.00000   -1.50000
H46B  2    0.005461    0.113038    0.204945    11.00000   -1.50000
H46C  2    0.012520    0.294320    0.217505    11.00000   -1.50000
AFIX   0
C47   1    0.473660    0.180143    0.158483    11.00000    0.02384    0.03795 =
         0.02124   -0.00397   -0.00168    0.01084
AFIX 137
H47A  2    0.455661    0.083466    0.165277    11.00000   -1.50000
H47B  2    0.499642    0.225436    0.176978    11.00000   -1.50000
H47C  2    0.495071    0.152458    0.141446    11.00000   -1.50000
AFIX   0
C48   1    0.385460   -0.064539    0.097263    11.00000    0.05656    0.02568 =
         0.03226    0.00585   -0.00458   -0.01427
AFIX 137
H48A  2    0.355870   -0.015094    0.107425    11.00000   -1.50000
H48B  2    0.417280   -0.098235    0.113999    11.00000   -1.50000
H48C  2    0.369668   -0.158181    0.084691    11.00000   -1.50000
AFIX   0
N1    3    0.236476    0.222696    0.128274    10.34000    0.06665
N2    3    0.266651    0.171368    0.121929    10.34000    0.08228
HKLF 4

REM  13174 in C2/c
REM R1 =  0.0536 for    7087 Fo > 4sig(Fo)  and  0.0771 for all    9540 data
REM    489 parameters refined using      0 restraints

END

WGHT      0.0724      2.3394

REM Highest difference peak  0.667,  deepest hole -0.390,  1-sigma level  0.068
Q1    1   0.4426  0.0548  0.0596  11.00000  0.05    0.67
Q2    1   0.0554  0.2211  0.2014  11.00000  0.05    0.64
Q3    1   0.4118  0.2966  0.2118  11.00000  0.05    0.58
Q4    1   0.1459  0.0005  0.0338  11.00000  0.05    0.55
Q5    1   0.1387 -0.0327  0.0602  11.00000  0.05    0.47
Q6    1   0.1299  0.0636  0.0270  11.00000  0.05    0.46
Q7    1   0.3804  0.0525  0.0798  11.00000  0.05    0.46
Q8    1   0.3882  0.3552  0.2074  11.00000  0.05    0.46
Q9    1   0.1169  0.2073  0.1804  11.00000  0.05    0.45
Q10   1   0.3096  0.5804  0.1833  11.00000  0.05    0.44
Q11   1   0.0495  0.2448  0.0833  11.00000  0.05    0.41
Q12   1   0.3455  0.4523  0.1093  11.00000  0.05    0.41
Q13   1   0.3433  0.2952  0.2290  11.00000  0.05    0.39
Q14   1   0.4007  0.2570  0.2429  11.00000  0.05    0.39
Q15   1   0.2309  0.3400  0.2341  11.00000  0.05    0.39
Q16   1   0.4072  0.0026  0.0862  11.00000  0.05    0.38
Q17   1   0.4299  0.3886  0.1572  11.00000  0.05    0.37
Q18   1   0.2521  0.4382  0.2195  11.00000  0.05    0.37
Q19   1   0.2788  0.4924  0.1967  11.00000  0.05    0.37
Q20   1   0.0818  0.1981  0.0924  11.00000  0.05    0.37
;
_shelx_res_checksum   24163

_shelx_hkl_file
;
   1  -1 -54    0.26    0.48
   3  -1 -54    0.81    0.49
   1  -3 -53    0.30    0.48
   3  -3 -53    5.00    0.86
   5  -3 -53    1.96    0.61
  -2  -2 -53    1.36    0.59
   0  -2 -53   -0.10    0.41
   2  -2 -53    0.02    0.45
   4  -2 -53    0.86    0.50
   6  -2 -53    0.05    0.42
   8  -2 -53    1.10    0.56
  -3  -1 -53    2.75    0.72
  -1  -1 -53    6.37    0.94
   1  -1 -53    0.57    0.49
   3  -1 -53    0.68    0.49
   5  -1 -53    1.32    0.59
   7  -1 -53   -0.07    0.40
   9  -1 -53    2.31    0.66
  -2   0 -53   -0.35    0.37
   0   0 -53    0.03    0.42
   2   0 -53    0.25    0.41
   4   0 -53    0.35    0.43
   6   0 -53    1.14    0.52
   8   0 -53    0.07    0.44
  10   0 -53   -0.06    0.40
   1   1 -53    0.86    0.52
   3   1 -53    1.88    0.64
   5   1 -53    1.83    0.61
   7   1 -53   -0.54    0.35
   9   1 -53    2.01    0.64
   4  -4 -52    0.12    0.45
  -1  -3 -52    2.90    0.68
   1  -3 -52    1.09    0.51
   3  -3 -52    1.31    0.57
   5  -3 -52   -0.31    0.41
   7  -3 -52    1.18    0.55
  -4  -2 -52    6.86    0.99
  -2  -2 -52    0.81    0.53
   0  -2 -52    1.85    0.62
   2  -2 -52   -0.11    0.40
   4  -2 -52    3.63    0.75
   6  -2 -52    0.32    0.44
   8  -2 -52    0.62    0.49
  10  -2 -52    1.01    0.57
  -5  -1 -52    0.30    0.51
  -3  -1 -52    0.94    0.55
  -1  -1 -52    0.52    0.49
   1  -1 -52    0.47    0.45
   3  -1 -52    0.86    0.51
   5  -1 -52    0.21    0.44
   7  -1 -52    1.71    0.61
   9  -1 -52    4.11    0.81
  11  -1 -52    8.06    1.07
  -4   0 -52    5.17    0.91
  -2   0 -52   -0.30    0.37
   0   0 -52    0.49    0.49
   2   0 -52    3.98    0.76
   4   0 -52    0.93    0.49
   6   0 -52   16.83    1.42
   8   0 -52    0.76    0.51
  10   0 -52    1.70    0.61
  12   0 -52    1.09    0.56
  -1   1 -52    0.35    0.45
   1   1 -52    0.35    0.47
   3   1 -52    0.48    0.48
   5   1 -52    0.33    0.44
   7   1 -52    1.64    0.60
   9   1 -52    4.45    0.83
  11   1 -52    9.24    1.10
   2   2 -52    0.74    0.52
   4   2 -52    3.07    0.75
   6   2 -52    0.49    0.48
   8   2 -52    0.78    0.51
  10   2 -52    0.98    0.51
   2  -4 -51    2.80    0.69
   4  -4 -51   -0.02    0.43
   6  -4 -51    0.74    0.49
   8  -4 -51    2.86    0.75
  -1  -3 -51    7.47    0.94
   1  -3 -51    3.23    0.69
   3  -3 -51    1.18    0.56
   5  -3 -51    0.12    0.42
   7  -3 -51    1.93    0.63
   9  -3 -51    1.53    0.60
  11  -3 -51    3.47    0.81
  -4  -2 -51    2.55    0.70
  -2  -2 -51    0.22    0.46
   0  -2 -51    0.00    0.40
   2  -2 -51    0.45    0.45
   4  -2 -51    1.11    0.53
   6  -2 -51    7.85    1.01
   8  -2 -51   -0.01    0.41
  10  -2 -51    1.71    0.63
  12  -2 -51    1.82    0.67
  -7  -1 -51    4.47    0.88
  -5  -1 -51    1.54    0.65
  -3  -1 -51    4.01    0.78
  -1  -1 -51    7.14    0.97
   1  -1 -51    0.22    0.43
   3  -1 -51    7.34    0.95
   5  -1 -51    6.11    0.91
   7  -1 -51    9.91    1.12
   9  -1 -51   11.13    1.19
  11  -1 -51    0.17    0.45
  13  -1 -51    0.67    0.56
  -6   0 -51    0.22    0.49
  -4   0 -51    0.36    0.47
  -2   0 -51    0.03    0.41
   0   0 -51   -0.57    0.35
   2   0 -51    0.39    0.43
   4   0 -51   -0.09    0.38
   6   0 -51    1.14    0.50
   8   0 -51   -0.10    0.38
  10   0 -51    0.17    0.42
  12   0 -51   -0.14    0.41
  14   0 -51    0.15    0.44
  -5   1 -51    1.27    0.61
  -3   1 -51    2.30    0.70
  -1   1 -51    7.69    1.02
   1   1 -51    0.33    0.47
   3   1 -51    6.80    0.95
   5   1 -51    7.93    0.99
   7   1 -51   12.25    1.22
   9   1 -51    8.85    1.10
  11   1 -51    0.49    0.50
  13   1 -51    1.76    0.62
  15   1 -51   -0.33    0.45
  -2   2 -51    0.29    0.50
   0   2 -51   -0.38    0.42
   2   2 -51    0.63    0.47
   4   2 -51    0.22    0.46
   6   2 -51    7.73    1.02
   8   2 -51    0.22    0.44
  10   2 -51    0.90    0.54
  12   2 -51    1.09    0.57
  14   2 -51   -0.40    0.47
   3   3 -51    1.48    0.63
   5   3 -51   -0.03    0.47
   7   3 -51    1.40    0.56
   9   3 -51    1.90    0.66
  11   3 -51    3.94    0.81
  13   3 -51    7.17    0.99
   2  -4 -50    0.80    0.45
   4  -4 -50    1.77    0.59
   6  -4 -50    1.32    0.58
   8  -4 -50    1.67    0.63
  10  -4 -50    1.30    0.61
  -1  -3 -50    2.69    0.67
   1  -3 -50    5.17    0.82
   3  -3 -50    1.27    0.55
   5  -3 -50   -0.34    0.38
   7  -3 -50   -0.01    0.43
   9  -3 -50    1.93    0.65
  11  -3 -50    1.67    0.63
  -4  -2 -50    7.59    0.98
  -2  -2 -50    0.74    0.50
   0  -2 -50    0.51    0.47
   2  -2 -50    0.06    0.42
   4  -2 -50    1.19    0.52
   6  -2 -50    0.60    0.49
   8  -2 -50    0.63    0.49
  10  -2 -50    0.90    0.52
  12  -2 -50    5.76    0.93
  14  -2 -50   -0.23    0.43
  -7  -1 -50    0.10    0.48
  -5  -1 -50    6.30    0.97
  -3  -1 -50   -0.04    0.44
  -1  -1 -50    3.92    0.78
   1  -1 -50    4.49    0.79
   3  -1 -50    2.28    0.62
   5  -1 -50   11.56    1.17
   7  -1 -50    9.56    1.04
   9  -1 -50    2.84    0.69
  11  -1 -50    0.50    0.48
  13  -1 -50    0.14    0.46
  15  -1 -50    3.55    0.80
  -8   0 -50   16.13    1.51
  -6   0 -50   15.26    1.47
  -4   0 -50   12.67    1.32
  -2   0 -50   -0.08    0.41
   0   0 -50    0.39    0.44
   2   0 -50    3.09    0.69
   4   0 -50    2.32    0.60
   6   0 -50   25.88    1.84
   8   0 -50    4.18    0.77
  10   0 -50    6.84    0.93
  12   0 -50    7.45    1.01
  14   0 -50    0.50    0.53
  16   0 -50    3.36    0.82
  -7   1 -50    0.03    0.49
  -5   1 -50    5.61    0.94
  -3   1 -50   -0.21    0.41
  -1   1 -50    5.44    0.87
   1   1 -50    7.33    0.96
   3   1 -50    2.05    0.61
   5   1 -50   11.75    1.19
   7   1 -50    7.20    0.97
   9   1 -50    0.99    0.54
  11   1 -50   -0.31    0.38
  13   1 -50    0.78    0.50
  15   1 -50    3.62    0.80
  -4   2 -50    6.18    0.98
  -2   2 -50    0.21    0.46
   0   2 -50    2.01    0.68
   2   2 -50   -0.13    0.40
   4   2 -50    1.56    0.60
   6   2 -50    1.14    0.54
   8   2 -50   -0.15    0.39
  10   2 -50    0.85    0.52
  12   2 -50    5.03    0.88
  14   2 -50    0.68    0.50
  16   2 -50    1.06    0.57
  -1   3 -50    3.02    0.78
   1   3 -50    4.65    0.88
   3   3 -50    1.47    0.61
   5   3 -50   -0.12    0.44
   7   3 -50   -0.50    0.37
   9   3 -50    0.84    0.56
  11   3 -50    1.74    0.58
  13   3 -50    1.47    0.61
  15   3 -50    0.38    0.49
   4   4 -50    2.42    0.74
   6   4 -50    1.27    0.61
   8   4 -50    2.52    0.72
  10   4 -50    2.27    0.72
  12   4 -50    5.89    0.97
   5  -5 -49    1.18    0.60
   7  -5 -49    0.60    0.54
   9  -5 -49    0.65    0.56
   2  -4 -49   -0.12    0.39
   4  -4 -49    1.15    0.55
   6  -4 -49    1.15    0.55
   8  -4 -49    0.77    0.54
  10  -4 -49   -0.09    0.47
  -1  -3 -49   14.95    1.34
   1  -3 -49   -0.27    0.40
   3  -3 -49   -0.45    0.36
   5  -3 -49   10.68    1.12
   7  -3 -49    4.90    0.85
   9  -3 -49    3.88    0.81
  11  -3 -49    0.74    0.54
  13  -3 -49    0.13    0.48
  -4  -2 -49    6.78    0.95
  -2  -2 -49   -0.61    0.36
   0  -2 -49   -0.47    0.34
   2  -2 -49    0.21    0.40
   4  -2 -49    5.37    0.83
   6  -2 -49    0.29    0.42
   8  -2 -49    0.57    0.44
  10  -2 -49    1.34    0.54
  12  -2 -49    0.16    0.45
  14  -2 -49    0.76    0.56
  -7  -1 -49    0.99    0.55
  -5  -1 -49   17.19    1.56
  -3  -1 -49    2.24    0.62
  -1  -1 -49    3.01    0.68
   1  -1 -49    1.60    0.54
   3  -1 -49    0.48    0.44
   5  -1 -49    1.05    0.47
   7  -1 -49    0.10    0.38
   9  -1 -49    0.02    0.39
  11  -1 -49    0.01    0.42
  13  -1 -49    4.38    0.84
  15  -1 -49    3.86    0.83
  17  -1 -49    5.09    0.96
 -10   0 -49    0.49    0.61
  -8   0 -49    0.95    0.59
  -6   0 -49    0.59    0.50
  -4   0 -49    1.11    0.57
  -2   0 -49   -0.05    0.43
   0   0 -49    0.11    0.41
   2   0 -49    0.18    0.38
   4   0 -49    0.23    0.37
   6   0 -49    0.03    0.40
   8   0 -49    0.25    0.40
  10   0 -49   -0.21    0.38
  12   0 -49    0.28    0.45
  14   0 -49    0.13    0.46
  16   0 -49    0.44    0.51
  18   0 -49    0.46    0.54
  -7   1 -49    0.83    0.56
  -5   1 -49   21.86    1.71
  -3   1 -49    2.53    0.70
  -1   1 -49    3.12    0.71
   1   1 -49    2.99    0.66
   3   1 -49   -0.12    0.36
   5   1 -49    0.40    0.43
   7   1 -49    0.68    0.45
   9   1 -49   -0.22    0.38
  11   1 -49    0.09    0.42
  13   1 -49    4.29    0.82
  15   1 -49    3.85    0.78
  17   1 -49    5.93    0.97
  -6   2 -49    1.81    0.68
  -4   2 -49    7.07    1.02
  -2   2 -49   -0.19    0.37
   0   2 -49    0.01    0.39
   2   2 -49    0.20    0.41
   4   2 -49    6.65    0.94
   6   2 -49    0.05    0.40
   8   2 -49   -0.06    0.39
  10   2 -49    1.74    0.59
  12   2 -49    0.09    0.43
  14   2 -49    2.17    0.66
  16   2 -49    3.96    0.82
  18   2 -49    3.31    0.78
  -3   3 -49   12.00    1.36
  -1   3 -49   15.60    1.49
   1   3 -49   -0.28    0.41
   3   3 -49    1.26    0.59
   5   3 -49    8.95    1.12
   7   3 -49    5.69    0.90
   9   3 -49    5.95    0.90
  11   3 -49    0.77    0.51
  13   3 -49   -0.23    0.41
  15   3 -49    1.57    0.56
  17   3 -49    0.77    0.55
   2   4 -49   -0.05    0.45
   4   4 -49    0.65    0.55
   6   4 -49    0.74    0.52
   8   4 -49    0.89    0.56
  10   4 -49    0.00    0.46
  12   4 -49    1.80    0.66
  14   4 -49    1.83    0.63
   9   5 -49    0.58    0.59
   5  -5 -48    5.36    0.85
   7  -5 -48    0.84    0.52
   9  -5 -48   -0.20    0.43
   2  -4 -48    0.34    0.46
   4  -4 -48   -0.19    0.40
   6  -4 -48   11.83    1.21
   8  -4 -48   -0.19    0.42
  10  -4 -48    2.72    0.72
  12  -4 -48    6.29    1.01
  -1  -3 -48    7.58    0.93
   1  -3 -48    1.33    0.55
   3  -3 -48   10.78    1.12
   5  -3 -48    3.09    0.67
   7  -3 -48    0.19    0.45
   9  -3 -48    1.80    0.63
  11  -3 -48    0.52    0.47
  13  -3 -48    0.98    0.55
  15  -3 -48    4.30    0.91
  -4  -2 -48    0.86    0.50
  -2  -2 -48    3.90    0.72
   0  -2 -48    1.11    0.51
   2  -2 -48    3.25    0.69
   4  -2 -48    2.64    0.64
   6  -2 -48    4.05    0.74
   8  -2 -48    4.39    0.78
  10  -2 -48    2.58    0.67
  12  -2 -48    9.79    1.13
  14  -2 -48   -0.06    0.45
  16  -2 -48    0.99    0.59
  -7  -1 -48    0.30    0.51
  -5  -1 -48    2.43    0.68
  -3  -1 -48    1.88    0.61
  -1  -1 -48    5.94    0.85
   1  -1 -48    3.16    0.68
   3  -1 -48    0.21    0.39
   5  -1 -48    0.78    0.46
   7  -1 -48    0.29    0.43
   9  -1 -48    0.48    0.43
  11  -1 -48    1.28    0.56
  13  -1 -48   -0.14    0.39
  15  -1 -48    5.27    0.91
  17  -1 -48    4.06    0.84
 -10   0 -48    0.58    0.58
  -8   0 -48    0.08    0.49
  -6   0 -48    3.98    0.81
  -4   0 -48    3.32    0.76
  -2   0 -48    1.34    0.58
   0   0 -48   -0.47    0.36
   2   0 -48    0.48    0.41
   4   0 -48   -0.06    0.37
   6   0 -48   -0.04    0.33
   8   0 -48    3.74    0.72
  10   0 -48    3.53    0.73
  12   0 -48    0.40    0.46
  14   0 -48   -0.26    0.41
  16   0 -48    5.68    0.95
  18   0 -48    9.71    1.19
  -9   1 -48    1.11    0.65
  -7   1 -48    0.88    0.56
  -5   1 -48    2.44    0.69
  -3   1 -48    3.13    0.73
  -1   1 -48    4.86    0.81
   1   1 -48    3.06    0.69
   3   1 -48    0.21    0.38
   5   1 -48    0.01    0.37
   7   1 -48   -0.12    0.37
   9   1 -48    0.36    0.45
  11   1 -48    0.19    0.42
  13   1 -48    0.95    0.54
  15   1 -48    5.61    0.92
  17   1 -48    2.78    0.73
  19   1 -48    1.18    0.57
  -8   2 -48    0.53    0.57
  -6   2 -48    0.92    0.60
  -4   2 -48    0.20    0.45
  -2   2 -48    2.82    0.72
   0   2 -48    1.39    0.54
   2   2 -48    1.92    0.62
   4   2 -48    4.47    0.80
   6   2 -48    5.79    0.88
   8   2 -48    3.84    0.75
  10   2 -48    2.82    0.67
  12   2 -48   10.97    1.15
  14   2 -48    0.82    0.52
  16   2 -48    0.86    0.52
  18   2 -48   14.34    1.39
  -5   3 -48    0.56    0.57
  -3   3 -48    7.47    1.10
  -1   3 -48    6.95    1.03
   1   3 -48    1.57    0.61
   3   3 -48   12.69    1.28
   5   3 -48    2.04    0.66
   7   3 -48    0.39    0.51
   9   3 -48    2.20    0.61
  11   3 -48    0.17    0.44
  13   3 -48    0.77    0.51
  15   3 -48    5.84    0.90
  17   3 -48    2.12    0.70
  -2   4 -48    2.10    0.75
   0   4 -48    1.24    0.60
   2   4 -48    0.12    0.43
   4   4 -48    0.04    0.48
   6   4 -48   10.21    1.22
   8   4 -48    0.91    0.54
  10   4 -48    2.29    0.68
  12   4 -48    9.95    1.13
  14   4 -48    0.61    0.52
  16   4 -48    0.16    0.46
   3   5 -48   -0.20    0.49
   5   5 -48    6.35    1.00
   7   5 -48   -0.31    0.42
   9   5 -48   -0.33    0.47
  11   5 -48    0.01    0.48
   5  -5 -47    1.06    0.55
   7  -5 -47    0.19    0.46
   9  -5 -47    0.73    0.53
  11  -5 -47    1.56    0.65
   2  -4 -47    0.52    0.46
   4  -4 -47   -0.10    0.41
   6  -4 -47    4.75    0.80
   8  -4 -47    2.77    0.71
  10  -4 -47    3.36    0.74
  12  -4 -47    0.32    0.49
  14  -4 -47    1.33    0.64
  -1  -3 -47    0.07    0.39
   1  -3 -47    0.51    0.42
   3  -3 -47    2.79    0.64
   5  -3 -47    6.75    0.91
   7  -3 -47    4.26    0.79
   9  -3 -47    3.36    0.73
  11  -3 -47    1.17    0.58
  13  -3 -47    5.62    0.91
  15  -3 -47    1.99    0.70
  -6  -2 -47    0.18    0.49
  -4  -2 -47   10.16    1.06
  -2  -2 -47    1.59    0.54
   0  -2 -47    1.81    0.56
   2  -2 -47    0.64    0.46
   4  -2 -47    8.10    0.96
   6  -2 -47    0.69    0.46
   8  -2 -47    1.71    0.61
  10  -2 -47    0.32    0.45
  12  -2 -47    0.61    0.51
  14  -2 -47    9.77    1.18
  16  -2 -47    7.17    1.10
  18  -2 -47    2.28    0.76
  -7  -1 -47    8.97    1.06
  -5  -1 -47    1.84    0.64
  -3  -1 -47    0.11    0.42
  -1  -1 -47    9.63    1.03
   1  -1 -47    2.22    0.61
   3  -1 -47    0.05    0.38
   5  -1 -47    7.91    0.93
   7  -1 -47    1.41    0.51
   9  -1 -47    0.28    0.39
  11  -1 -47    0.51    0.44
  13  -1 -47    1.39    0.57
  15  -1 -47   13.50    1.36
  17  -1 -47    7.22    1.04
  19  -1 -47    7.61    1.10
 -10   0 -47    0.27    0.53
  -8   0 -47    0.30    0.52
  -6   0 -47    0.70    0.51
  -4   0 -47    0.31    0.45
  -2   0 -47    0.73    0.49
   0   0 -47   -0.30    0.34
   2   0 -47    0.62    0.43
   4   0 -47    0.11    0.36
   6   0 -47    0.27    0.39
   8   0 -47    0.41    0.40
  10   0 -47    0.20    0.41
  12   0 -47    0.22    0.43
  14   0 -47    0.34    0.43
  16   0 -47    0.98    0.54
  18   0 -47    0.03    0.47
  20   0 -47   -0.32    0.48
 -11   1 -47    8.64    1.16
  -9   1 -47    2.73    0.77
  -7   1 -47    7.51    1.07
  -5   1 -47    3.01    0.73
  -3   1 -47    0.18    0.45
  -1   1 -47    7.31    0.97
   1   1 -47    1.73    0.58
   3   1 -47    0.13    0.38
   5   1 -47    8.20    0.98
   7   1 -47    0.56    0.47
   9   1 -47    0.25    0.41
  11   1 -47   -0.16    0.37
  13   1 -47    0.93    0.53
  15   1 -47   11.74    1.26
  17   1 -47    4.99    0.90
  19   1 -47    7.08    1.04
  -8   2 -47    0.55    0.55
  -6   2 -47    0.49    0.53
  -4   2 -47    8.69    1.10
  -2   2 -47    1.70    0.61
   0   2 -47    2.88    0.69
   2   2 -47    1.60    0.57
   4   2 -47    8.62    1.02
   6   2 -47   -0.10    0.37
   8   2 -47    3.35    0.70
  10   2 -47    0.23    0.43
  12   2 -47    0.48    0.48
  14   2 -47   12.35    1.20
  16   2 -47    9.37    1.08
  18   2 -47    2.27    0.70
  20   2 -47   -0.22    0.47
  -5   3 -47    3.25    0.83
  -3   3 -47    0.70    0.52
  -1   3 -47    0.55    0.47
   1   3 -47    0.12    0.46
   3   3 -47    2.43    0.69
   5   3 -47    7.19    0.97
   7   3 -47    6.95    0.92
   9   3 -47    2.78    0.69
  11   3 -47    1.32    0.56
  13   3 -47    4.78    0.82
  15   3 -47    1.67    0.62
  17   3 -47   19.82    1.55
  19   3 -47    7.97    1.04
  -2   4 -47   23.35    1.85
   0   4 -47    4.37    0.86
   2   4 -47    1.11    0.59
   4   4 -47    1.28    0.63
   6   4 -47    3.94    0.79
   8   4 -47    2.18    0.64
  10   4 -47    3.09    0.73
  12   4 -47    0.39    0.51
  14   4 -47    0.73    0.58
  16   4 -47    0.94    0.55
   1   5 -47    1.90    0.71
   3   5 -47    1.34    0.66
   5   5 -47   -0.18    0.44
   7   5 -47    0.22    0.49
   9   5 -47    1.40    0.62
  11   5 -47    1.22    0.61
   8  -6 -46    0.10    0.49
  10  -6 -46    0.19    0.56
   5  -5 -46    0.34    0.49
   7  -5 -46   30.06    2.00
   9  -5 -46    3.91    0.80
  11  -5 -46    6.93    1.06
  13  -5 -46    0.09    0.48
   2  -4 -46    5.60    0.82
   4  -4 -46    2.90    0.66
   6  -4 -46    5.36    0.82
   8  -4 -46    0.19    0.44
  10  -4 -46    0.11    0.47
  12  -4 -46    6.28    1.00
  14  -4 -46   -0.10    0.46
  -3  -3 -46    2.43    0.59
  -1  -3 -46    0.99    0.48
   1  -3 -46    4.69    0.77
   3  -3 -46   -0.06    0.36
   5  -3 -46    0.24    0.41
   7  -3 -46    1.13    0.52
   9  -3 -46    0.57    0.45
  11  -3 -46    0.28    0.43
  13  -3 -46    0.30    0.53
  15  -3 -46    7.57    1.09
  17  -3 -46    3.85    0.87
  -6  -2 -46    0.07    0.45
  -4  -2 -46    1.23    0.54
  -2  -2 -46    1.07    0.48
   0  -2 -46   -0.03    0.37
   2  -2 -46    2.41    0.61
   4  -2 -46    0.34    0.41
   6  -2 -46    0.37    0.39
   8  -2 -46    0.04    0.38
  10  -2 -46   -0.06    0.39
  12  -2 -46    0.58    0.49
  14  -2 -46    2.04    0.62
  16  -2 -46    0.67    0.53
  18  -2 -46    2.72    0.80
  -9  -1 -46    3.40    0.76
  -7  -1 -46    1.74    0.63
  -5  -1 -46    8.00    1.01
  -3  -1 -46    0.85    0.48
  -1  -1 -46    0.74    0.44
   1  -1 -46    0.82    0.44
   3  -1 -46    1.10    0.50
   5  -1 -46    0.41    0.37
   7  -1 -46    2.46    0.61
   9  -1 -46    0.13    0.40
  11  -1 -46    1.39    0.57
  13  -1 -46    1.20    0.51
  15  -1 -46    2.05    0.68
  17  -1 -46    0.65    0.51
  19  -1 -46   -0.04    0.48
 -12   0 -46    6.65    1.01
 -10   0 -46    0.57    0.55
  -8   0 -46    5.44    0.90
  -6   0 -46    0.10    0.44
  -4   0 -46    4.33    0.79
  -2   0 -46   31.91    2.14
   0   0 -46    1.08    0.47
   2   0 -46   18.43    1.39
   4   0 -46   25.65    1.76
   6   0 -46    9.77    1.03
   8   0 -46    1.66    0.56
  10   0 -46    0.62    0.48
  12   0 -46    5.33    0.86
  14   0 -46   10.53    1.17
  16   0 -46    1.38    0.60
  18   0 -46    0.68    0.59
  20   0 -46    3.18    0.81
 -11   1 -46   -0.67    0.43
  -9   1 -46    3.36    0.80
  -7   1 -46    1.83    0.69
  -5   1 -46   10.64    1.15
  -3   1 -46    0.28    0.46
  -1   1 -46    1.04    0.50
   1   1 -46    0.84    0.48
   3   1 -46    1.99    0.58
   5   1 -46    1.50    0.53
   7   1 -46    1.95    0.59
   9   1 -46    0.36    0.44
  11   1 -46    0.58    0.47
  13   1 -46    0.92    0.54
  15   1 -46    2.46    0.68
  17   1 -46    0.03    0.43
  19   1 -46    0.68    0.52
  21   1 -46    1.11    0.61
 -10   2 -46    0.43    0.55
  -8   2 -46   -0.40    0.46
  -6   2 -46    0.16    0.48
  -4   2 -46    0.91    0.52
  -2   2 -46    1.43    0.57
   0   2 -46   -0.22    0.37
   2   2 -46    2.54    0.63
   4   2 -46    0.78    0.44
   6   2 -46    0.06    0.37
   8   2 -46    0.24    0.42
  10   2 -46    0.34    0.42
  12   2 -46    0.90    0.49
  14   2 -46    1.51    0.57
  16   2 -46    0.74    0.48
  18   2 -46    2.81    0.72
  20   2 -46   -0.14    0.45
  -7   3 -46    0.19    0.52
  -5   3 -46    0.00    0.49
  -3   3 -46    3.16    0.77
  -1   3 -46    1.24    0.54
   1   3 -46    5.83    0.91
   3   3 -46    0.56    0.49
   5   3 -46    0.59    0.46
   7   3 -46    1.31    0.56
   9   3 -46    0.26    0.43
  11   3 -46   -0.35    0.36
  13   3 -46    0.62    0.45
  15   3 -46    5.98    0.90
  17   3 -46    4.10    0.79
  19   3 -46   -0.18    0.44
  -4   4 -46    1.96    0.70
  -2   4 -46    0.86    0.57
   0   4 -46    0.74    0.56
   2   4 -46    6.11    0.94
   4   4 -46    3.55    0.76
   6   4 -46    4.69    0.87
   8   4 -46    1.42    0.59
  10   4 -46    0.63    0.51
  12   4 -46    7.71    0.97
  14   4 -46    1.64    0.57
  -1   5 -46    3.88    0.91
   1   5 -46    3.84    0.90
   3   5 -46   17.84    1.60
   5   5 -46   -0.39    0.43
   7   5 -46   30.16    2.06
   9   5 -46    2.46    0.74
  11   5 -46    5.81    0.94
   4   6 -46   -0.44    0.52
   6   6 -46    6.11    1.02
   8   6 -46   -0.26    0.48
   8  -6 -45    0.91    0.58
  10  -6 -45    1.30    0.61
   5  -5 -45    6.16    0.89
   7  -5 -45    6.62    0.94
   9  -5 -45    0.33    0.47
  11  -5 -45    0.66    0.55
  13  -5 -45    0.46    0.48
   0  -4 -45    0.91    0.45
   2  -4 -45    0.02    0.37
   4  -4 -45    0.45    0.46
   6  -4 -45    7.87    0.97
   8  -4 -45    1.08    0.50
  10  -4 -45    1.76    0.63
  12  -4 -45    0.64    0.55
  14  -4 -45    0.96    0.58
  16  -4 -45    9.18    1.18
  -3  -3 -45    2.24    0.59
  -1  -3 -45    0.96    0.47
   1  -3 -45   -0.13    0.34
   3  -3 -45    4.51    0.74
   5  -3 -45    0.30    0.43
   7  -3 -45    0.91    0.50
   9  -3 -45    7.11    0.96
  11  -3 -45   -0.07    0.43
  13  -3 -45   10.32    1.19
  15  -3 -45   10.45    1.22
  17  -3 -45    7.23    1.06
  -6  -2 -45   12.91    1.19
  -4  -2 -45    1.18    0.51
  -2  -2 -45    1.08    0.49
   0  -2 -45    0.18    0.38
   2  -2 -45    6.59    0.88
   4  -2 -45    0.87    0.45
   6  -2 -45   -0.26    0.34
   8  -2 -45    6.19    0.84
  10  -2 -45    0.24    0.42
  12  -2 -45    7.58    0.99
  14  -2 -45    3.20    0.77
  16  -2 -45    2.40    0.73
  18  -2 -45    3.90    0.86
  20  -2 -45   -0.30    0.49
  -9  -1 -45    5.16    0.86
  -7  -1 -45    0.19    0.44
  -5  -1 -45    5.57    0.84
  -3  -1 -45    0.18    0.41
  -1  -1 -45    0.14    0.38
   1  -1 -45    2.52    0.59
   3  -1 -45    3.93    0.69
   5  -1 -45    0.03    0.33
   7  -1 -45    0.30    0.39
   9  -1 -45    0.98    0.50
  11  -1 -45    3.22    0.69
  13  -1 -45    4.43    0.81
  15  -1 -45    6.47    0.99
  17  -1 -45    2.05    0.67
  19  -1 -45    4.51    0.91
  21  -1 -45    1.29    0.71
 -12   0 -45    0.16    0.51
 -10   0 -45   -0.17    0.44
  -8   0 -45    0.06    0.44
  -6   0 -45    0.67    0.50
  -4   0 -45   -0.32    0.39
  -2   0 -45    1.51    0.53
   0   0 -45   -0.30    0.35
   2   0 -45    0.28    0.39
   4   0 -45    0.66    0.42
   6   0 -45    0.69    0.43
   8   0 -45   -0.26    0.31
  10   0 -45    0.10    0.38
  12   0 -45   -0.33    0.35
  14   0 -45   -0.12    0.43
  16   0 -45   -0.14    0.41
  18   0 -45    0.30    0.49
  20   0 -45   -0.04    0.45
  22   0 -45   -0.06    0.51
 -13   1 -45    0.04    0.52
 -11   1 -45   -0.30    0.47
  -9   1 -45    2.99    0.79
  -7   1 -45   -0.49    0.38
  -5   1 -45    5.33    0.87
  -3   1 -45    0.11    0.42
  -1   1 -45   -0.05    0.37
   1   1 -45    2.00    0.59
   3   1 -45    3.15    0.65
   5   1 -45    0.11    0.38
   7   1 -45   -0.04    0.38
   9   1 -45    0.77    0.45
  11   1 -45    2.70    0.65
  13   1 -45    4.41    0.78
  15   1 -45    8.80    1.06
  17   1 -45    2.50    0.66
  19   1 -45    4.72    0.84
  21   1 -45    3.52    0.80
 -12   2 -45    0.78    0.66
 -10   2 -45   -0.61    0.42
  -8   2 -45    2.64    0.76
  -6   2 -45   11.66    1.29
  -4   2 -45    1.91    0.63
  -2   2 -45    0.56    0.48
   0   2 -45   -0.10    0.36
   2   2 -45   10.30    1.08
   4   2 -45    0.56    0.43
   6   2 -45    0.20    0.38
   8   2 -45    4.73    0.78
  10   2 -45    1.34    0.54
  12   2 -45    8.38    0.98
  14   2 -45    1.95    0.58
  16   2 -45    2.36    0.64
  18   2 -45    3.17    0.74
  20   2 -45    0.10    0.48
  22   2 -45    0.42    0.54
  -9   3 -45    2.50    0.80
  -7   3 -45    3.09    0.80
  -5   3 -45   -0.02    0.47
  -3   3 -45    1.58    0.64
  -1   3 -45    0.91    0.53
   1   3 -45    0.04    0.41
   3   3 -45    4.29    0.79
   5   3 -45   -0.31    0.38
   7   3 -45   -0.28    0.35
   9   3 -45    8.79    1.00
  11   3 -45   -0.04    0.39
  13   3 -45   10.06    1.09
  15   3 -45   11.65    1.19
  17   3 -45    6.80    0.94
  19   3 -45    9.29    1.07
  -6   4 -45    1.41    0.64
  -4   4 -45    3.65    0.85
  -2   4 -45    0.07    0.46
   0   4 -45    0.14    0.46
   2   4 -45    0.33    0.49
   4   4 -45    0.74    0.52
   6   4 -45    8.97    1.07
   8   4 -45    0.53    0.49
  10   4 -45    1.78    0.59
  12   4 -45    1.45    0.57
  14   4 -45    0.82    0.51
  -3   5 -45    4.02    0.91
  -1   5 -45    0.75    0.63
   1   5 -45   -0.32    0.48
   3   5 -45   -0.07    0.48
   5   5 -45    8.80    1.12
   7   5 -45    7.00    1.01
   9   5 -45   -0.28    0.44
  11   5 -45    0.40    0.50
   2   6 -45    0.19    0.55
   4   6 -45    1.78    0.72
   6   6 -45    8.30    1.11
   8   6 -45   -0.33    0.49
   8  -6 -44   10.40    1.18
  10  -6 -44    0.00    0.49
  12  -6 -44    2.60    0.74
   5  -5 -44    4.21    0.75
   7  -5 -44    3.90    0.76
   9  -5 -44    7.05    0.97
  11  -5 -44    1.87    0.66
  13  -5 -44    0.58    0.50
  15  -5 -44    0.13    0.44
   0  -4 -44    0.74    0.42
   2  -4 -44    0.00    0.36
   4  -4 -44    5.98    0.85
   6  -4 -44    0.60    0.43
   8  -4 -44    0.46    0.47
  10  -4 -44    2.77    0.70
  12  -4 -44    0.12    0.45
  14  -4 -44    0.16    0.46
  16  -4 -44    8.27    1.13
  -3  -3 -44    1.05    0.46
  -1  -3 -44   11.54    1.08
   1  -3 -44    0.51    0.41
   3  -3 -44    8.85    0.99
   5  -3 -44   -0.29    0.33
   7  -3 -44    5.30    0.81
   9  -3 -44    3.54    0.71
  11  -3 -44    2.59    0.68
  13  -3 -44    4.11    0.82
  15  -3 -44    1.01    0.59
  17  -3 -44    0.97    0.58
  19  -3 -44    1.54    0.65
  -6  -2 -44   11.58    1.12
  -4  -2 -44    0.38    0.45
  -2  -2 -44   34.14    2.06
   0  -2 -44   -0.03    0.36
   2  -2 -44   17.01    1.33
   4  -2 -44    3.23    0.63
   6  -2 -44    0.66    0.47
   8  -2 -44    3.31    0.69
  10  -2 -44    1.12    0.51
  12  -2 -44    4.30    0.80
  14  -2 -44    0.30    0.49
  16  -2 -44    0.34    0.52
  18  -2 -44    2.62    0.77
  20  -2 -44    1.37    0.65
  -9  -1 -44    0.43    0.52
  -7  -1 -44    1.27    0.55
  -5  -1 -44    0.54    0.44
  -3  -1 -44    4.53    0.74
  -1  -1 -44   -0.35    0.30
   1  -1 -44    3.57    0.65
   3  -1 -44    0.00    0.35
   5  -1 -44    3.57    0.66
   7  -1 -44    2.64    0.62
   9  -1 -44    3.94    0.73
  11  -1 -44    3.45    0.72
  13  -1 -44    1.45    0.56
  15  -1 -44   -0.37    0.40
  17  -1 -44   18.43    1.52
  19  -1 -44    1.00    0.61
  21  -1 -44    9.78    1.22
 -12   0 -44    2.13    0.71
 -10   0 -44    0.47    0.52
  -8   0 -44    0.62    0.49
  -6   0 -44    6.09    0.89
  -4   0 -44   15.96    1.33
  -2   0 -44    0.95    0.47
   0   0 -44    1.95    0.58
   2   0 -44    0.21    0.39
   4   0 -44    0.39    0.39
   6   0 -44    3.78    0.67
   8   0 -44    0.07    0.38
  10   0 -44   -0.32    0.32
  12   0 -44    4.16    0.77
  14   0 -44    0.05    0.44
  16   0 -44   14.19    1.34
  18   0 -44   -0.15    0.43
  20   0 -44    1.79    0.67
  22   0 -44   -0.18    0.51
 -13   1 -44   -0.08    0.54
 -11   1 -44    0.94    0.58
  -9   1 -44    2.07    0.65
  -7   1 -44    2.00    0.66
  -5   1 -44    0.23    0.44
  -3   1 -44    6.16    0.87
  -1   1 -44    0.15    0.38
   1   1 -44    4.16    0.73
   3   1 -44    0.66    0.40
   5   1 -44    2.23    0.59
   7   1 -44    2.31    0.60
   9   1 -44    4.59    0.73
  11   1 -44    6.35    0.86
  13   1 -44    1.13    0.52
  15   1 -44    0.30    0.45
  17   1 -44   16.37    1.46
  19   1 -44    0.62    0.51
  21   1 -44    7.41    1.06
  23   1 -44    0.43    0.52
 -12   2 -44   12.13    1.39
 -10   2 -44    0.07    0.50
  -8   2 -44    8.68    1.13
  -6   2 -44    8.94    1.14
  -4   2 -44    0.56    0.46
  -2   2 -44   34.88    2.20
   0   2 -44    0.22    0.40
   2   2 -44   17.06    1.39
   4   2 -44    3.00    0.66
   6   2 -44    1.09    0.50
   8   2 -44    3.37    0.66
  10   2 -44    0.24    0.42
  12   2 -44    4.73    0.76
  14   2 -44    0.40    0.42
  16   2 -44    0.61    0.48
  18   2 -44    3.50    0.75
  20   2 -44    1.00    0.56
  22   2 -44   10.88    1.22
  -9   3 -44   -0.12    0.50
  -7   3 -44    4.29    0.88
  -5   3 -44    1.46    0.62
  -3   3 -44    1.04    0.54
  -1   3 -44    9.74    1.14
   1   3 -44    0.38    0.47
   3   3 -44   10.27    1.08
   5   3 -44   -0.14    0.36
   7   3 -44    6.59    0.89
   9   3 -44    2.53    0.63
  11   3 -44    2.79    0.68
  13   3 -44    4.73    0.78
  15   3 -44    1.14    0.55
  17   3 -44    0.60    0.46
  19   3 -44    1.01    0.51
  -8   4 -44    4.38    0.92
  -6   4 -44    0.02    0.52
  -4   4 -44    3.88    0.88
  -2   4 -44    5.79    0.96
   0   4 -44    0.20    0.44
   2   4 -44   -0.05    0.40
   4   4 -44    6.98    0.96
   6   4 -44    1.22    0.56
   8   4 -44   -0.11    0.36
  10   4 -44    1.90    0.61
  12   4 -44   -0.02    0.39
  14   4 -44    0.10    0.43
  -5   5 -44    7.76    1.18
  -3   5 -44    0.02    0.52
  -1   5 -44    0.56    0.59
   1   5 -44    0.74    0.60
   3   5 -44    1.57    0.62
   5   5 -44    3.65    0.80
   7   5 -44    2.11    0.69
   9   5 -44    3.56    0.80
  11   5 -44    1.61    0.60
   0   6 -44   -0.39    0.50
   2   6 -44   -0.32    0.49
   4   6 -44    3.54    0.83
   6   6 -44    0.22    0.50
   8   6 -44   12.40    1.28
   8  -6 -43    0.65    0.56
  10  -6 -43   -0.11    0.47
  12  -6 -43    0.48    0.51
   3  -5 -43    3.85    0.69
   5  -5 -43    5.34    0.80
   7  -5 -43   -0.32    0.34
   9  -5 -43    6.38    0.97
  11  -5 -43   11.13    1.22
  13  -5 -43    3.09    0.80
  15  -5 -43    5.38    0.94
   0  -4 -43    4.72    0.72
   2  -4 -43    0.43    0.41
   4  -4 -43   15.12    1.28
   6  -4 -43    4.22    0.73
   8  -4 -43    6.42    0.88
  10  -4 -43    1.76    0.62
  12  -4 -43    4.71    0.86
  14  -4 -43    3.05    0.75
  16  -4 -43    4.12    0.86
  18  -4 -43    0.36    0.54
  -3  -3 -43   12.70    1.14
  -1  -3 -43    0.48    0.40
   1  -3 -43    8.22    0.90
   3  -3 -43    0.50    0.42
   5  -3 -43    9.40    1.01
   7  -3 -43    0.83    0.46
   9  -3 -43    3.42    0.72
  11  -3 -43    2.89    0.69
  13  -3 -43    0.43    0.48
  15  -3 -43    2.32    0.69
  17  -3 -43    4.63    0.89
  19  -3 -43    0.11    0.54
  -6  -2 -43    0.06    0.42
  -4  -2 -43    1.96    0.58
  -2  -2 -43    0.57    0.41
   0  -2 -43   -0.04    0.36
   2  -2 -43    4.58    0.69
   4  -2 -43    4.95    0.74
   6  -2 -43    9.85    1.03
   8  -2 -43    7.17    0.90
  10  -2 -43    3.97    0.75
  12  -2 -43    8.84    1.04
  14  -2 -43    6.94    0.96
  16  -2 -43    7.36    1.01
  18  -2 -43    0.81    0.54
  20  -2 -43    1.16    0.60
  -9  -1 -43    6.69    0.94
  -7  -1 -43   -0.07    0.41
  -5  -1 -43    3.25    0.70
  -3  -1 -43   10.29    1.05
  -1  -1 -43    2.46    0.59
   1  -1 -43    2.85    0.61
   3  -1 -43    2.95    0.62
   5  -1 -43    3.41    0.65
   7  -1 -43    0.93    0.44
   9  -1 -43    9.41    1.02
  11  -1 -43    7.30    0.94
  13  -1 -43    2.34    0.64
  15  -1 -43    9.58    1.10
  17  -1 -43    2.75    0.75
  19  -1 -43    1.26    0.65
  21  -1 -43    0.34    0.49
 -12   0 -43   -0.27    0.46
 -10   0 -43   -0.39    0.43
  -8   0 -43   -0.12    0.40
  -6   0 -43    1.24    0.53
  -4   0 -43    0.04    0.38
  -2   0 -43    0.16    0.38
   0   0 -43    0.16    0.38
   2   0 -43   -0.26    0.30
   4   0 -43    0.22    0.34
   6   0 -43   -0.37    0.27
   8   0 -43   -0.37    0.29
  10   0 -43    0.38    0.42
  12   0 -43    0.65    0.45
  14   0 -43   -0.24    0.38
  16   0 -43    0.23    0.44
  18   0 -43    0.23    0.47
  20   0 -43    0.25    0.49
  22   0 -43    0.37    0.52
  24   0 -43    1.16    0.65
 -15   1 -43    2.85    0.85
 -13   1 -43    3.56    0.83
 -11   1 -43   -0.32    0.45
  -9   1 -43    6.43    0.96
  -7   1 -43   -0.16    0.40
  -5   1 -43    1.81    0.61
  -3   1 -43   10.55    1.09
  -1   1 -43    3.45    0.68
   1   1 -43    4.18    0.69
   3   1 -43    3.09    0.62
   5   1 -43    2.79    0.61
   7   1 -43    0.55    0.40
   9   1 -43    8.76    0.99
  11   1 -43    6.77    0.90
  13   1 -43    3.59    0.73
  15   1 -43    5.71    0.87
  17   1 -43    3.56    0.73
  19   1 -43    1.39    0.57
  21   1 -43   -0.22    0.47
  23   1 -43    0.82    0.55
 -14   2 -43    5.19    1.00
 -12   2 -43    5.06    0.97
 -10   2 -43    1.24    0.60
  -8   2 -43    0.27    0.50
  -6   2 -43    0.31    0.46
  -4   2 -43    1.63    0.60
  -2   2 -43    0.84    0.47
   0   2 -43    0.02    0.37
   2   2 -43    3.74    0.70
   4   2 -43    4.36    0.72
   6   2 -43    7.26    0.93
   8   2 -43    7.00    0.88
  10   2 -43    4.17    0.72
  12   2 -43    8.01    0.94
  14   2 -43    3.14    0.69
  16   2 -43    5.09    0.83
  18   2 -43   -0.28    0.40
  20   2 -43    1.53    0.61
  22   2 -43   -0.25    0.46
 -11   3 -43    0.12    0.52
  -9   3 -43   -0.09    0.48
  -7   3 -43   -0.17    0.43
  -5   3 -43    5.96    0.94
  -3   3 -43   13.91    1.32
  -1   3 -43    0.32    0.44
   1   3 -43    7.25    0.96
   3   3 -43    1.47    0.54
   5   3 -43    9.24    1.05
   7   3 -43    1.40    0.54
   9   3 -43    2.79    0.63
  11   3 -43    3.32    0.68
  13   3 -43    0.57    0.47
  15   3 -43    2.36    0.62
  17   3 -43    5.53    0.82
  19   3 -43    0.30    0.47
  -8   4 -43    0.50    0.59
  -6   4 -43    1.57    0.67
  -4   4 -43    1.98    0.69
  -2   4 -43    0.61    0.50
   0   4 -43    6.62    0.96
   2   4 -43   -0.28    0.39
   4   4 -43   17.90    1.45
   6   4 -43    1.08    0.54
   8   4 -43    5.07    0.81
  10   4 -43    3.32    0.69
  12   4 -43    3.73    0.71
  14   4 -43    3.10    0.69
  -5   5 -43   -0.49    0.47
  -3   5 -43    0.03    0.48
  -1   5 -43    1.19    0.66
   1   5 -43   -0.44    0.46
   3   5 -43    2.64    0.72
   5   5 -43    5.02    0.85
   7   5 -43    0.29    0.46
   9   5 -43    7.80    1.00
  11   5 -43    7.61    1.03
  -2   6 -43    0.02    0.56
   0   6 -43    1.72    0.72
   2   6 -43    0.85    0.62
   4   6 -43    2.21    0.75
   6   6 -43    0.54    0.60
   8   6 -43   -0.01    0.50
   3   7 -43    1.31    0.67
   5   7 -43    0.45    0.57
   8  -6 -42    4.22    0.81
  10  -6 -42    2.47    0.72
  12  -6 -42    8.88    1.15
  14  -6 -42    1.26    0.65
   3  -5 -42    0.04    0.39
   5  -5 -42    2.48    0.63
   7  -5 -42    2.71    0.67
   9  -5 -42    1.08    0.55
  11  -5 -42    0.44    0.46
  13  -5 -42    7.15    1.04
  15  -5 -42    1.33    0.65
   0  -4 -42    0.37    0.43
   2  -4 -42    0.93    0.45
   4  -4 -42    1.90    0.56
   6  -4 -42    9.38    0.99
   8  -4 -42    3.96    0.76
  10  -4 -42    3.76    0.77
  12  -4 -42    0.97    0.52
  14  -4 -42    1.07    0.58
  16  -4 -42    0.96    0.54
  18  -4 -42    5.41    0.97
  -3  -3 -42    0.50    0.38
  -1  -3 -42    2.30    0.58
   1  -3 -42    8.87    0.93
   3  -3 -42    1.62    0.54
   5  -3 -42    9.17    0.97
   7  -3 -42    0.28    0.40
   9  -3 -42    0.14    0.42
  11  -3 -42    0.61    0.49
  13  -3 -42    0.35    0.43
  15  -3 -42    8.27    1.05
  17  -3 -42    4.67    0.89
  19  -3 -42    1.04    0.62
  -6  -2 -42   -0.21    0.39
  -4  -2 -42    7.19    0.86
  -2  -2 -42    3.36    0.64
   0  -2 -42    0.32    0.37
   2  -2 -42    1.07    0.44
   4  -2 -42    0.05    0.34
   6  -2 -42    0.74    0.43
   8  -2 -42    0.14    0.38
  10  -2 -42    1.33    0.51
  12  -2 -42    1.78    0.60
  14  -2 -42    1.01    0.54
  16  -2 -42    0.09    0.42
  18  -2 -42    5.88    0.96
  20  -2 -42   -0.60    0.43
  22  -2 -42    1.15    0.66
  -9  -1 -42    6.55    0.93
  -7  -1 -42    2.96    0.69
  -5  -1 -42    2.96    0.62
  -3  -1 -42    9.80    1.00
  -1  -1 -42    0.64    0.41
   1  -1 -42   13.26    1.19
   3  -1 -42    1.38    0.49
   5  -1 -42    9.01    0.93
   7  -1 -42    4.35    0.71
   9  -1 -42    2.42    0.59
  11  -1 -42    0.85    0.48
  13  -1 -42    2.72    0.65
  15  -1 -42   12.25    1.23
  17  -1 -42   -0.60    0.41
  19  -1 -42    0.34    0.52
  21  -1 -42    0.70    0.55
  23  -1 -42    0.58    0.57
 -12   0 -42   20.67    1.62
 -10   0 -42   17.79    1.53
  -8   0 -42    6.71    0.92
  -6   0 -42  113.68    5.80
  -4   0 -42    2.23    0.60
  -2   0 -42    4.00    0.70
   0   0 -42    6.94    0.87
   2   0 -42   -0.43    0.27
   4   0 -42    0.20    0.33
   6   0 -42   -0.61    0.25
   8   0 -42    1.97    0.56
  10   0 -42   -0.05    0.35
  12   0 -42    1.29    0.55
  14   0 -42   19.29    1.50
  16   0 -42   15.54    1.34
  18   0 -42    5.36    0.89
  20   0 -42    0.99    0.55
  22   0 -42   10.20    1.22
  24   0 -42   10.50    1.26
 -15   1 -42   -0.35    0.53
 -13   1 -42    1.70    0.68
 -11   1 -42    0.00    0.44
  -9   1 -42    9.39    1.08
  -7   1 -42    3.22    0.72
  -5   1 -42    1.67    0.56
  -3   1 -42    9.74    1.05
  -1   1 -42    0.17    0.37
   1   1 -42   14.15    1.17
   3   1 -42    3.41    0.62
   5   1 -42    9.40    0.97
   7   1 -42    3.49    0.65
   9   1 -42    2.37    0.59
  11   1 -42    2.87    0.64
  13   1 -42    2.02    0.61
  15   1 -42    9.74    1.09
  17   1 -42    0.40    0.44
  19   1 -42    0.52    0.48
  21   1 -42    0.74    0.49
  23   1 -42   -0.35    0.41
 -14   2 -42    2.73    0.81
 -12   2 -42    4.72    0.94
 -10   2 -42   -0.22    0.40
  -8   2 -42    4.81    0.89
  -6   2 -42    0.50    0.50
  -4   2 -42    7.99    0.98
  -2   2 -42    3.05    0.69
   0   2 -42   -0.51    0.31
   2   2 -42    1.05    0.46
   4   2 -42    0.65    0.42
   6   2 -42   -0.07    0.35
   8   2 -42    0.88    0.46
  10   2 -42    0.66    0.42
  12   2 -42    1.04    0.48
  14   2 -42    0.41    0.41
  16   2 -42    0.46    0.43
  18   2 -42    4.94    0.83
  20   2 -42    0.19    0.45
 -11   3 -42    2.90    0.82
  -9   3 -42    0.40    0.57
  -7   3 -42    1.77    0.65
  -5   3 -42    0.36    0.48
  -3   3 -42   -0.03    0.40
  -1   3 -42    2.81    0.68
   1   3 -42    8.58    1.03
   3   3 -42    1.04    0.51
   5   3 -42    7.83    0.97
   7   3 -42    0.30    0.40
   9   3 -42    0.63    0.42
  11   3 -42    0.10    0.37
  13   3 -42   -0.08    0.40
  15   3 -42    5.54    0.82
  17   3 -42    4.35    0.75
 -10   4 -42    0.07    0.56
  -8   4 -42    5.69    1.01
  -6   4 -42    1.95    0.66
  -4   4 -42   -0.49    0.43
  -2   4 -42    7.11    1.02
   0   4 -42    0.28    0.47
   2   4 -42   -0.03    0.45
   4   4 -42    0.56    0.48
   6   4 -42    7.02    0.93
   8   4 -42    3.66    0.73
  10   4 -42    2.70    0.67
  12   4 -42    1.19    0.50
  14   4 -42    0.17    0.42
  -7   5 -42    9.26    1.29
  -5   5 -42    1.88    0.70
  -3   5 -42    9.16    1.17
  -1   5 -42    4.77    0.91
   1   5 -42   -0.14    0.49
   3   5 -42   -0.27    0.45
   5   5 -42    3.36    0.75
   7   5 -42    3.32    0.74
   9   5 -42    2.57    0.67
  11   5 -42    0.21    0.45
  -4   6 -42   -0.14    0.56
  -2   6 -42   -0.26    0.52
   0   6 -42   11.13    1.29
   2   6 -42    2.28    0.75
   4   6 -42    0.61    0.60
   6   6 -42    8.02    1.11
   8   6 -42    3.79    0.81
   1   7 -42   -0.06    0.58
   3   7 -42    2.56    0.83
   5   7 -42    0.60    0.60
  11  -7 -41    0.12    0.53
   6  -6 -41    0.22    0.43
   8  -6 -41    0.35    0.45
  10  -6 -41    0.17    0.47
  12  -6 -41    0.90    0.55
  14  -6 -41    5.13    0.93
   3  -5 -41    0.67    0.41
   5  -5 -41    1.95    0.54
   7  -5 -41   -0.46    0.38
   9  -5 -41    0.15    0.45
  11  -5 -41    5.25    0.89
  13  -5 -41    0.86    0.57
  15  -5 -41   -0.58    0.43
  17  -5 -41    0.04    0.46
   0  -4 -41    2.83    0.60
   2  -4 -41   12.53    1.08
   4  -4 -41    1.39    0.48
   6  -4 -41    0.48    0.41
   8  -4 -41    4.54    0.77
  10  -4 -41    3.17    0.71
  12  -4 -41    0.72    0.48
  14  -4 -41    0.35    0.45
  16  -4 -41    5.82    0.97
  18  -4 -41    0.80    0.56
  -3  -3 -41    0.45    0.41
  -1  -3 -41    0.22    0.37
   1  -3 -41    5.34    0.74
   3  -3 -41    0.81    0.44
   5  -3 -41   14.69    1.22
   7  -3 -41    0.01    0.35
   9  -3 -41   30.33    1.96
  11  -3 -41   10.14    1.11
  13  -3 -41    2.23    0.66
  15  -3 -41   12.09    1.27
  17  -3 -41    3.05    0.77
  19  -3 -41    0.16    0.53
  21  -3 -41    0.43    0.59
  -6  -2 -41    1.83    0.57
  -4  -2 -41    1.99    0.54
  -2  -2 -41    0.05    0.37
   0  -2 -41    3.25    0.62
   2  -2 -41    4.14    0.67
   4  -2 -41    0.05    0.33
   6  -2 -41    0.15    0.39
   8  -2 -41    0.58    0.44
  10  -2 -41    0.68    0.45
  12  -2 -41    0.34    0.40
  14  -2 -41    2.70    0.69
  16  -2 -41    0.22    0.46
  18  -2 -41    0.54    0.50
  20  -2 -41   -0.01    0.50
  22  -2 -41    1.94    0.69
  -9  -1 -41   14.14    1.27
  -7  -1 -41   15.37    1.36
  -5  -1 -41    6.86    0.88
  -3  -1 -41    9.28    0.97
  -1  -1 -41    3.23    0.61
   1  -1 -41    1.48    0.49
   3  -1 -41    0.63    0.39
   5  -1 -41    0.67    0.39
   7  -1 -41   -0.08    0.33
   9  -1 -41    0.17    0.38
  11  -1 -41    0.64    0.43
  13  -1 -41    1.78    0.58
  15  -1 -41    1.54    0.59
  17  -1 -41    0.18    0.45
  19  -1 -41   -0.16    0.42
  21  -1 -41    0.88    0.50
  23  -1 -41    0.28    0.52
 -12   0 -41   -0.04    0.44
 -10   0 -41   -0.17    0.43
  -8   0 -41   -0.04    0.40
  -6   0 -41    1.74    0.52
  -4   0 -41    0.25    0.41
  -2   0 -41    0.24    0.37
   0   0 -41    0.92    0.43
   2   0 -41   -0.05    0.29
   4   0 -41   -0.35    0.26
   6   0 -41   -0.07    0.32
   8   0 -41    0.12    0.35
  10   0 -41    0.21    0.37
  12   0 -41    0.08    0.35
  14   0 -41    0.25    0.40
  16   0 -41    0.85    0.46
  18   0 -41   -0.08    0.41
  20   0 -41    0.41    0.51
  22   0 -41    0.52    0.54
  24   0 -41    0.42    0.52
 -15   1 -41    0.61    0.58
 -13   1 -41    0.00    0.54
 -11   1 -41    1.33    0.60
  -9   1 -41   13.71    1.30
  -7   1 -41   17.82    1.41
  -5   1 -41    9.38    1.02
  -3   1 -41    9.47    1.03
  -1   1 -41    2.12    0.57
   1   1 -41    2.22    0.53
   3   1 -41    1.08    0.46
   5   1 -41    0.10    0.34
   7   1 -41    0.28    0.34
   9   1 -41    0.47    0.37
  11   1 -41    0.37    0.43
  13   1 -41    1.57    0.53
  15   1 -41    1.07    0.51
  17   1 -41   -0.02    0.42
  19   1 -41   -0.16    0.37
  21   1 -41    1.08    0.52
  23   1 -41    0.24    0.48
 -14   2 -41   12.79    1.43
 -12   2 -41    4.56    0.91
 -10   2 -41    3.17    0.78
  -8   2 -41    7.02    1.01
  -6   2 -41    2.33    0.66
  -4   2 -41    0.57    0.46
  -2   2 -41    0.25    0.42
   0   2 -41    3.87    0.69
   2   2 -41    3.60    0.69
   4   2 -41    0.39    0.39
   6   2 -41    0.68    0.42
   8   2 -41    1.02    0.47
  10   2 -41    1.21    0.49
  12   2 -41    0.12    0.36
  14   2 -41    3.31    0.68
  16   2 -41    0.62    0.46
  18   2 -41    0.51    0.42
  20   2 -41   -0.19    0.40
 -11   3 -41    7.15    1.08
  -9   3 -41   -0.48    0.44
  -7   3 -41   -0.28    0.41
  -5   3 -41   -0.06    0.42
  -3   3 -41    0.36    0.45
  -1   3 -41   -0.05    0.39
   1   3 -41    5.45    0.83
   3   3 -41    1.45    0.54
   5   3 -41   14.09    1.29
   7   3 -41   -0.26    0.34
   9   3 -41   29.95    1.90
  11   3 -41   12.34    1.10
  13   3 -41    1.76    0.57
  15   3 -41   12.19    1.15
  17   3 -41    2.27    0.61
 -10   4 -41   -0.75    0.45
  -8   4 -41    0.79    0.59
  -6   4 -41    0.11    0.47
  -4   4 -41    3.33    0.80
  -2   4 -41    1.65    0.61
   0   4 -41    4.35    0.80
   2   4 -41    9.74    1.11
   4   4 -41    0.19    0.47
   6   4 -41    0.03    0.41
   8   4 -41    3.25    0.68
  10   4 -41    3.39    0.69
  12   4 -41    0.16    0.39
  14   4 -41   -0.68    0.33
  -7   5 -41    9.06    1.25
  -5   5 -41    0.40    0.55
  -3   5 -41    7.78    1.07
  -1   5 -41    0.53    0.54
   1   5 -41    2.06    0.70
   3   5 -41    0.34    0.44
   5   5 -41    1.69    0.62
   7   5 -41   -0.28    0.39
   9   5 -41    0.19    0.44
  11   5 -41    5.16    0.80
  -4   6 -41   -0.44    0.53
  -2   6 -41   -0.58    0.48
   0   6 -41    1.62    0.72
   2   6 -41   -0.07    0.49
   4   6 -41    0.51    0.53
   6   6 -41    0.34    0.50
   8   6 -41   -0.02    0.47
  -1   7 -41    0.10    0.60
   1   7 -41    2.60    0.84
   3   7 -41    0.12    0.50
   5   7 -41    1.12    0.65
  11  -7 -40    0.12    0.54
  13  -7 -40   12.27    1.37
   6  -6 -40    3.90    0.74
   8  -6 -40    2.29    0.66
  10  -6 -40    4.62    0.84
  12  -6 -40    4.40    0.87
  14  -6 -40   10.69    1.27
   3  -5 -40    1.63    0.54
   5  -5 -40    0.72    0.44
   7  -5 -40    0.11    0.42
   9  -5 -40    0.76    0.47
  11  -5 -40    1.29    0.56
  13  -5 -40    0.50    0.52
  15  -5 -40    1.92    0.69
  17  -5 -40    1.22    0.64
   0  -4 -40    3.22    0.60
   2  -4 -40    4.36    0.69
   4  -4 -40    0.09    0.35
   6  -4 -40   18.39    1.41
   8  -4 -40   14.56    1.28
  10  -4 -40    5.25    0.83
  12  -4 -40   19.41    1.49
  14  -4 -40    1.64    0.61
  16  -4 -40    2.66    0.72
  18  -4 -40    0.93    0.57
  20  -4 -40    1.73    0.69
  -3  -3 -40    5.74    0.76
  -1  -3 -40    2.83    0.57
   1  -3 -40    9.77    0.97
   3  -3 -40    6.85    0.84
   5  -3 -40    1.67    0.51
   7  -3 -40    6.56    0.83
   9  -3 -40    1.90    0.57
  11  -3 -40    2.19    0.62
  13  -3 -40    3.38    0.73
  15  -3 -40    0.47    0.46
  17  -3 -40    0.29    0.50
  19  -3 -40    3.48    0.83
  21  -3 -40    0.03    0.50
  -6  -2 -40    0.30    0.41
  -4  -2 -40    2.13    0.53
  -2  -2 -40   11.34    1.08
   0  -2 -40    1.12    0.42
   2  -2 -40    1.73    0.50
   4  -2 -40   -0.15    0.34
   6  -2 -40    1.10    0.44
   8  -2 -40    5.40    0.77
  10  -2 -40    0.59    0.42
  12  -2 -40   18.92    1.45
  14  -2 -40   11.95    1.21
  16  -2 -40    1.39    0.57
  18  -2 -40   31.19    2.13
  20  -2 -40    6.38    1.04
  22  -2 -40    2.38    0.76
  -9  -1 -40   14.88    1.29
  -7  -1 -40    2.02    0.60
  -5  -1 -40    0.47    0.41
  -3  -1 -40   10.77    1.04
  -1  -1 -40    0.03    0.31
   1  -1 -40   10.33    0.95
   3  -1 -40    1.83    0.51
   5  -1 -40    6.63    0.80
   7  -1 -40    4.47    0.70
   9  -1 -40    2.38    0.57
  11  -1 -40    0.78    0.43
  13  -1 -40    2.27    0.62
  15  -1 -40   10.83    1.18
  17  -1 -40   -0.02    0.43
  19  -1 -40   -0.15    0.42
  21  -1 -40   -0.12    0.48
  23  -1 -40    0.42    0.53
  25  -1 -40    1.82    0.71
 -12   0 -40    0.78    0.48
 -10   0 -40    1.00    0.52
  -8   0 -40    1.11    0.54
  -6   0 -40    1.83    0.58
  -4   0 -40   19.27    1.42
  -2   0 -40    2.28    0.57
   0   0 -40   11.52    1.04
   2   0 -40    0.68    0.41
   4   0 -40    4.73    0.69
   6   0 -40   -0.44    0.26
   8   0 -40   -0.16    0.31
  10   0 -40    7.46    0.90
  12   0 -40    0.64    0.41
  14   0 -40   19.82    1.50
  16   0 -40   49.08    2.90
  18   0 -40    1.01    0.53
  20   0 -40    4.86    0.89
  22   0 -40    0.38    0.49
  24   0 -40    7.20    1.05
 -15   1 -40   15.73    1.49
 -13   1 -40    1.68    0.67
 -11   1 -40    3.74    0.77
  -9   1 -40   16.63    1.43
  -7   1 -40    1.27    0.55
  -5   1 -40    0.32    0.43
  -3   1 -40   10.69    1.09
  -1   1 -40    0.07    0.33
   1   1 -40    6.85    0.85
   3   1 -40    1.79    0.52
   5   1 -40    4.58    0.71
   7   1 -40    4.99    0.71
   9   1 -40    1.70    0.51
  11   1 -40    0.19    0.36
  13   1 -40    0.16    0.39
  15   1 -40   10.90    1.12
  17   1 -40    0.24    0.47
  19   1 -40    0.05    0.41
  21   1 -40    1.01    0.56
  23   1 -40    0.04    0.51
 -14   2 -40   12.65    1.44
 -12   2 -40    5.63    0.95
 -10   2 -40    2.74    0.72
  -8   2 -40    2.41    0.69
  -6   2 -40   -0.11    0.41
  -4   2 -40    1.25    0.50
  -2   2 -40   15.67    1.24
   0   2 -40    2.13    0.57
   2   2 -40    1.63    0.53
   4   2 -40    0.57    0.41
   6   2 -40    0.70    0.41
   8   2 -40    6.25    0.80
  10   2 -40    0.62    0.40
  12   2 -40   16.45    1.31
  14   2 -40   10.50    1.08
  16   2 -40    1.52    0.55
  18   2 -40   30.45    1.97
  20   2 -40    7.87    0.97
 -11   3 -40    9.61    1.20
  -9   3 -40    2.12    0.73
  -7   3 -40    6.05    0.95
  -5   3 -40    0.75    0.54
  -3   3 -40    6.08    0.89
  -1   3 -40    3.23    0.69
   1   3 -40   10.36    1.09
   3   3 -40    7.45    0.93
   5   3 -40    0.65    0.44
   7   3 -40    4.69    0.74
   9   3 -40    1.13    0.48
  11   3 -40    2.36    0.58
  13   3 -40    1.66    0.54
  15   3 -40    0.12    0.39
  17   3 -40    0.99    0.50
 -10   4 -40    0.78    0.56
  -8   4 -40    0.03    0.50
  -6   4 -40   -0.53    0.40
  -4   4 -40    2.48    0.72
  -2   4 -40    0.35    0.48
   0   4 -40    3.68    0.75
   2   4 -40    4.67    0.80
   4   4 -40    0.50    0.46
   6   4 -40   20.01    1.49
   8   4 -40   13.00    1.20
  10   4 -40    3.79    0.71
  12   4 -40   14.56    1.28
  14   4 -40    1.89    0.54
  -9   5 -40    0.31    0.59
  -7   5 -40    0.51    0.59
  -5   5 -40    6.59    1.02
  -3   5 -40    3.25    0.80
  -1   5 -40    4.95    0.90
   1   5 -40    0.65    0.53
   3   5 -40    2.00    0.65
   5   5 -40    0.69    0.53
   7   5 -40    0.75    0.50
   9   5 -40    0.22    0.39
  11   5 -40    0.64    0.50
  -6   6 -40    5.02    1.01
  -4   6 -40   21.04    1.83
  -2   6 -40    8.40    1.15
   0   6 -40    5.57    0.96
   2   6 -40    1.91    0.67
   4   6 -40    2.07    0.68
   6   6 -40    6.00    0.92
   8   6 -40    1.78    0.60
  -1   7 -40   -0.28    0.53
   1   7 -40    0.40    0.60
   3   7 -40    0.54    0.59
   5   7 -40    7.40    1.08
  11  -7 -39    1.84    0.67
  13  -7 -39    1.04    0.58
   6  -6 -39    0.23    0.41
   8  -6 -39    4.06    0.77
  10  -6 -39    0.78    0.50
  12  -6 -39    5.25    0.92
  14  -6 -39    3.77    0.82
  16  -6 -39    4.80    0.91
   3  -5 -39    4.72    0.69
   5  -5 -39    1.21    0.50
   7  -5 -39    0.83    0.50
   9  -5 -39    0.67    0.47
  11  -5 -39    0.21    0.42
  13  -5 -39    7.38    1.02
  15  -5 -39    0.30    0.49
  17  -5 -39    0.99    0.57
  19  -5 -39    0.48    0.57
   0  -4 -39    9.92    0.95
   2  -4 -39    9.24    0.92
   4  -4 -39    0.19    0.37
   6  -4 -39    5.37    0.78
   8  -4 -39    1.31    0.52
  10  -4 -39    3.17    0.69
  12  -4 -39    4.56    0.82
  14  -4 -39    0.46    0.48
  16  -4 -39    9.46    1.16
  18  -4 -39    1.93    0.66
  20  -4 -39    0.34    0.53
  -5  -3 -39    0.25    0.35
  -3  -3 -39    6.41    0.76
  -1  -3 -39    1.03    0.41
   1  -3 -39    4.35    0.65
   3  -3 -39    1.13    0.42
   5  -3 -39    1.25    0.49
   7  -3 -39   -0.05    0.35
   9  -3 -39    1.60    0.57
  11  -3 -39   -0.01    0.37
  13  -3 -39   -0.20    0.39
  15  -3 -39    0.49    0.46
  17  -3 -39   17.65    1.55
  19  -3 -39    5.29    0.96
  21  -3 -39    2.48    0.78
  -8  -2 -39    1.88    0.56
  -6  -2 -39    0.53    0.43
  -4  -2 -39    0.28    0.35
  -2  -2 -39    0.64    0.37
   0  -2 -39    0.34    0.36
   2  -2 -39    0.17    0.34
   4  -2 -39   10.91    1.01
   6  -2 -39    4.38    0.69
   8  -2 -39    3.13    0.62
  10  -2 -39    0.48    0.44
  12  -2 -39    2.68    0.63
  14  -2 -39    0.35    0.43
  16  -2 -39    2.11    0.66
  18  -2 -39    3.24    0.77
  20  -2 -39    6.57    1.00
  22  -2 -39    6.03    1.03
  24  -2 -39    0.43    0.57
 -11  -1 -39   -0.28    0.41
  -9  -1 -39    1.66    0.54
  -7  -1 -39    2.56    0.62
  -5  -1 -39    0.51    0.42
  -3  -1 -39    3.71    0.64
  -1  -1 -39    1.62    0.49
   1  -1 -39   15.63    1.19
   3  -1 -39    0.01    0.29
   5  -1 -39   17.71    1.31
   7  -1 -39    5.34    0.76
   9  -1 -39    1.12    0.47
  11  -1 -39    2.25    0.59
  13  -1 -39    0.21    0.38
  15  -1 -39    9.74    1.08
  17  -1 -39    3.40    0.73
  19  -1 -39    8.61    1.08
  21  -1 -39    0.52    0.59
  23  -1 -39    7.69    1.12
  25  -1 -39    1.12    0.60
 -14   0 -39    0.08    0.47
 -12   0 -39    0.63    0.46
 -10   0 -39   -0.39    0.38
  -8   0 -39    0.47    0.44
  -6   0 -39   -0.32    0.33
  -4   0 -39    1.69    0.50
  -2   0 -39    0.20    0.36
   0   0 -39    0.22    0.33
   2   0 -39    0.53    0.38
   4   0 -39    0.28    0.34
   6   0 -39    0.19    0.34
   8   0 -39   -0.28    0.32
  10   0 -39    0.78    0.43
  12   0 -39    0.41    0.38
  14   0 -39    0.57    0.44
  16   0 -39    0.42    0.42
  18   0 -39   -0.45    0.40
  20   0 -39    0.30    0.49
  22   0 -39    0.42    0.50
  24   0 -39    0.80    0.55
  26   0 -39    0.23    0.51
 -15   1 -39    2.26    0.69
 -13   1 -39    2.20    0.63
 -11   1 -39    0.33    0.45
  -9   1 -39    2.43    0.68
  -7   1 -39    2.62    0.64
  -5   1 -39    1.00    0.49
  -3   1 -39    4.01    0.69
  -1   1 -39    2.47    0.57
   1   1 -39   15.82    1.23
   3   1 -39    0.42    0.37
   5   1 -39   16.09    1.28
   7   1 -39    6.87    0.81
   9   1 -39    1.09    0.45
  11   1 -39    3.43    0.65
  13   1 -39    0.11    0.36
  15   1 -39    8.40    0.98
  17   1 -39    4.71    0.78
  19   1 -39    8.21    1.00
  21   1 -39    1.88    0.65
  23   1 -39    8.75    1.08
 -14   2 -39   11.05    1.29
 -12   2 -39    4.10    0.87
 -10   2 -39    1.26    0.57
  -8   2 -39    0.97    0.56
  -6   2 -39    0.08    0.41
  -4   2 -39    0.07    0.38
  -2   2 -39    0.50    0.41
   0   2 -39    0.88    0.41
   2   2 -39    0.16    0.37
   4   2 -39   10.08    1.00
   6   2 -39    4.02    0.68
   8   2 -39    2.11    0.55
  10   2 -39    0.83    0.40
  12   2 -39    2.25    0.57
  14   2 -39    0.51    0.40
  16   2 -39    0.88    0.48
  18   2 -39    3.18    0.69
  20   2 -39    3.46    0.73
 -11   3 -39    6.14    0.99
  -9   3 -39    1.20    0.60
  -7   3 -39    2.99    0.74
  -5   3 -39    0.10    0.41
  -3   3 -39    5.21    0.83
  -1   3 -39    0.31    0.41
   1   3 -39    4.31    0.75
   3   3 -39    0.77    0.46
   5   3 -39    2.66    0.61
   7   3 -39    0.04    0.32
   9   3 -39    0.57    0.44
  11   3 -39   -0.16    0.33
  13   3 -39    0.85    0.45
  15   3 -39    1.00    0.46
  17   3 -39   14.47    1.29
 -10   4 -39    0.34    0.54
  -8   4 -39    1.81    0.66
  -6   4 -39    1.26    0.59
  -4   4 -39   12.52    1.34
  -2   4 -39    0.34    0.45
   0   4 -39    7.96    1.01
   2   4 -39    8.70    1.03
   4   4 -39    0.36    0.44
   6   4 -39    5.23    0.79
   8   4 -39    1.45    0.52
  10   4 -39    3.01    0.64
  12   4 -39    5.02    0.77
  14   4 -39    0.62    0.46
  -9   5 -39    4.12    0.94
  -7   5 -39    0.83    0.63
  -5   5 -39    8.32    1.12
  -3   5 -39   -0.02    0.47
  -1   5 -39    0.50    0.53
   1   5 -39    3.61    0.79
   3   5 -39    2.62    0.72
   5   5 -39    3.23    0.69
   7   5 -39    1.61    0.59
   9   5 -39    0.40    0.43
  11   5 -39    0.20    0.42
  -6   6 -39    2.85    0.83
  -4   6 -39    8.56    1.21
  -2   6 -39   -0.01    0.51
   0   6 -39    6.63    1.00
   2   6 -39    5.74    0.93
   4   6 -39    1.36    0.63
   6   6 -39    0.29    0.50
   8   6 -39    4.46    0.81
  -1   7 -39    0.28    0.58
   1   7 -39    3.55    0.88
   3   7 -39    4.23    0.88
   5   7 -39    3.38    0.82
   9  -7 -38    0.61    0.54
  11  -7 -38    2.01    0.69
  13  -7 -38    1.83    0.69
   6  -6 -38    1.14    0.52
   8  -6 -38    2.87    0.70
  10  -6 -38    0.91    0.53
  12  -6 -38    2.41    0.71
  14  -6 -38    7.21    1.05
  16  -6 -38    0.13    0.49
   3  -5 -38    9.27    0.92
   5  -5 -38   12.76    1.16
   7  -5 -38    5.85    0.84
   9  -5 -38    3.87    0.77
  11  -5 -38    0.65    0.48
  13  -5 -38    0.77    0.53
  15  -5 -38   16.14    1.52
  17  -5 -38    3.23    0.82
  19  -5 -38    6.57    1.06
   0  -4 -38    1.40    0.47
   2  -4 -38    0.55    0.38
   4  -4 -38    6.98    0.83
   6  -4 -38    1.77    0.54
   8  -4 -38    5.21    0.77
  10  -4 -38    0.02    0.38
  12  -4 -38   10.42    1.13
  14  -4 -38    4.67    0.84
  16  -4 -38    4.87    0.84
  18  -4 -38    9.12    1.16
  20  -4 -38    1.34    0.66
  -5  -3 -38    0.08    0.36
  -3  -3 -38    2.37    0.54
  -1  -3 -38    0.04    0.28
   1  -3 -38    0.41    0.34
   3  -3 -38    2.97    0.58
   5  -3 -38    4.05    0.64
   7  -3 -38    0.64    0.44
   9  -3 -38    0.57    0.43
  11  -3 -38    1.19    0.51
  13  -3 -38    0.47    0.44
  15  -3 -38    0.99    0.53
  17  -3 -38    3.68    0.80
  19  -3 -38    6.67    1.01
  21  -3 -38    5.17    0.96
  23  -3 -38   35.14    2.49
  -8  -2 -38   -0.19    0.35
  -6  -2 -38   -0.30    0.34
  -4  -2 -38    1.12    0.42
  -2  -2 -38    4.03    0.61
   0  -2 -38    0.39    0.36
   2  -2 -38    3.43    0.60
   4  -2 -38    8.53    0.91
   6  -2 -38    0.13    0.31
   8  -2 -38    5.29    0.77
  10  -2 -38    1.36    0.54
  12  -2 -38   13.77    1.26
  14  -2 -38    0.69    0.48
  16  -2 -38    4.36    0.80
  18  -2 -38    0.23    0.48
  20  -2 -38    3.15    0.79
  22  -2 -38    0.34    0.55
  24  -2 -38    1.04    0.62
 -11  -1 -38    0.37    0.47
  -9  -1 -38    2.20    0.58
  -7  -1 -38    4.16    0.70
  -5  -1 -38   20.66    1.51
  -3  -1 -38    4.59    0.67
  -1  -1 -38    1.20    0.45
   1  -1 -38    1.22    0.43
   3  -1 -38   11.65    1.04
   5  -1 -38    0.69    0.40
   7  -1 -38    0.15    0.34
   9  -1 -38    1.13    0.47
  11  -1 -38   -0.41    0.33
  13  -1 -38   -0.31    0.38
  15  -1 -38    2.20    0.64
  17  -1 -38    0.28    0.48
  19  -1 -38   -0.34    0.41
  21  -1 -38    1.23    0.57
  23  -1 -38    0.39    0.52
  25  -1 -38    1.47    0.68
 -14   0 -38    6.02    0.93
 -12   0 -38   -0.25    0.40
 -10   0 -38    0.35    0.44
  -8   0 -38    0.40    0.42
  -6   0 -38    2.82    0.64
  -4   0 -38   71.16    3.72
  -2   0 -38   -0.12    0.33
   0   0 -38   15.78    1.19
   2   0 -38    1.29    0.44
   4   0 -38   30.76    1.86
   6   0 -38    5.79    0.75
   8   0 -38    8.25    0.92
  10   0 -38   15.91    1.27
  12   0 -38    0.48    0.40
  14   0 -38   49.95    2.77
  16   0 -38    0.40    0.47
  18   0 -38   18.37    1.49
  20   0 -38   17.98    1.48
  22   0 -38    0.93    0.52
  24   0 -38    8.09    1.06
  26   0 -38    1.77    0.70
 -15   1 -38   19.06    1.56
 -13   1 -38    1.59    0.62
 -11   1 -38    0.45    0.46
  -9   1 -38    1.85    0.62
  -7   1 -38    1.67    0.60
  -5   1 -38   22.39    1.60
  -3   1 -38    4.40    0.70
  -1   1 -38    1.48    0.47
   1   1 -38    1.25    0.43
   3   1 -38   12.50    1.07
   5   1 -38    1.61    0.48
   7   1 -38    0.71    0.39
   9   1 -38    0.19    0.39
  11   1 -38    0.41    0.38
  13   1 -38    0.57    0.40
  15   1 -38    1.83    0.55
  17   1 -38   -0.13    0.35
  19   1 -38    0.08    0.43
  21   1 -38    1.83    0.59
  23   1 -38    0.12    0.49
 -14   2 -38    3.11    0.81
 -12   2 -38    0.56    0.53
 -10   2 -38    0.55    0.50
  -8   2 -38   -0.60    0.37
  -6   2 -38   -0.27    0.37
  -4   2 -38    0.18    0.40
  -2   2 -38    3.34    0.66
   0   2 -38    0.01    0.34
   2   2 -38    4.08    0.68
   4   2 -38   10.28    0.99
   6   2 -38    0.33    0.34
   8   2 -38    6.64    0.79
  10   2 -38    1.41    0.47
  12   2 -38   15.05    1.19
  14   2 -38    1.42    0.51
  16   2 -38    3.59    0.70
  18   2 -38    0.15    0.37
  20   2 -38    0.79    0.49
 -11   3 -38   -0.11    0.47
  -9   3 -38   -0.16    0.39
  -7   3 -38    1.26    0.59
  -5   3 -38    0.17    0.38
  -3   3 -38    2.21    0.62
  -1   3 -38   -0.22    0.35
   1   3 -38    0.04    0.37
   3   3 -38    2.06    0.56
   5   3 -38    3.41    0.65
   7   3 -38    0.28    0.38
   9   3 -38    0.71    0.42
  11   3 -38    0.86    0.45
  13   3 -38    0.05    0.35
  15   3 -38    0.16    0.37
  17   3 -38    2.72    0.62
 -10   4 -38    0.10    0.51
  -8   4 -38    1.51    0.63
  -6   4 -38    0.07    0.45
  -4   4 -38   -0.13    0.43
  -2   4 -38    2.30    0.66
   0   4 -38    1.46    0.56
   2   4 -38    0.44    0.44
   4   4 -38    7.39    0.92
   6   4 -38    1.80    0.55
   8   4 -38    3.96    0.71
  10   4 -38    0.57    0.41
  12   4 -38    8.05    0.93
  14   4 -38    6.25    0.81
  -9   5 -38    0.03    0.55
  -7   5 -38    1.72    0.70
  -5   5 -38    1.41    0.64
  -3   5 -38    0.28    0.47
  -1   5 -38   13.97    1.38
   1   5 -38    9.00    1.08
   3   5 -38    7.13    0.97
   5   5 -38   12.03    1.19
   7   5 -38    4.99    0.82
   9   5 -38    5.37    0.81
  11   5 -38    0.03    0.39
  -6   6 -38    0.66    0.62
  -4   6 -38    4.39    0.93
  -2   6 -38    7.23    1.06
   0   6 -38    1.14    0.60
   2   6 -38    1.02    0.57
   4   6 -38    3.15    0.75
   6   6 -38    1.83    0.62
   8   6 -38    2.15    0.67
  -1   7 -38   10.40    1.27
   1   7 -38   -0.35    0.43
   3   7 -38    0.19    0.54
   5   7 -38   -0.44    0.47
   9  -7 -37    0.27    0.48
  11  -7 -37    0.40    0.53
  13  -7 -37    0.55    0.54
  15  -7 -37    1.21    0.63
   6  -6 -37    2.37    0.62
   8  -6 -37    0.22    0.44
  10  -6 -37    1.53    0.59
  12  -6 -37    0.53    0.48
  14  -6 -37    2.27    0.72
  16  -6 -37    0.51    0.53
   3  -5 -37   -0.18    0.35
   5  -5 -37    0.26    0.42
   7  -5 -37   -0.06    0.34
   9  -5 -37    1.82    0.60
  11  -5 -37    2.02    0.64
  13  -5 -37    0.29    0.46
  15  -5 -37    0.69    0.52
  17  -5 -37    2.03    0.70
  19  -5 -37    2.57    0.71
  -2  -4 -37    4.94    0.67
   0  -4 -37    0.72    0.39
   2  -4 -37   -0.17    0.32
   4  -4 -37    0.94    0.41
   6  -4 -37    0.49    0.42
   8  -4 -37    5.46    0.84
  10  -4 -37    0.01    0.38
  12  -4 -37    0.46    0.47
  14  -4 -37   14.77    1.33
  16  -4 -37    6.29    0.95
  18  -4 -37    1.38    0.58
  20  -4 -37    4.80    0.91
  22  -4 -37    1.29    0.61
  -5  -3 -37    1.09    0.43
  -3  -3 -37    7.34    0.81
  -1  -3 -37    0.45    0.38
   1  -3 -37   16.47    1.19
   3  -3 -37   13.09    1.06
   5  -3 -37   20.91    1.41
   7  -3 -37    6.70    0.84
   9  -3 -37    1.74    0.54
  11  -3 -37   -0.17    0.35
  13  -3 -37   -0.20    0.39
  15  -3 -37   31.13    2.07
  17  -3 -37    0.38    0.47
  19  -3 -37    4.95    0.91
  21  -3 -37   23.16    1.86
  23  -3 -37   15.46    1.54
  -8  -2 -37    0.21    0.40
  -6  -2 -37    0.11    0.33
  -4  -2 -37   10.90    0.97
  -2  -2 -37    2.78    0.55
   0  -2 -37    4.65    0.67
   2  -2 -37   53.71    2.95
   4  -2 -37    5.22    0.70
   6  -2 -37    1.07    0.44
   8  -2 -37   11.27    1.05
  10  -2 -37    1.20    0.49
  12  -2 -37   10.60    1.10
  14  -2 -37    0.03    0.38
  16  -2 -37    0.06    0.42
  18  -2 -37   10.11    1.13
  20  -2 -37    5.09    0.92
  22  -2 -37    1.88    0.69
  24  -2 -37    1.26    0.63
 -11  -1 -37    6.91    0.90
  -9  -1 -37   -0.18    0.35
  -7  -1 -37    0.50    0.45
  -5  -1 -37   33.24    2.06
  -3  -1 -37    1.89    0.49
  -1  -1 -37   29.40    1.76
   1  -1 -37   14.11    1.12
   3  -1 -37    0.88    0.38
   5  -1 -37    6.06    0.76
   7  -1 -37    3.99    0.63
   9  -1 -37    0.17    0.37
  11  -1 -37   -0.04    0.37
  13  -1 -37   10.07    1.01
  15  -1 -37    4.81    0.80
  17  -1 -37    4.54    0.83
  19  -1 -37    0.46    0.48
  21  -1 -37    7.75    1.05
  23  -1 -37    3.09    0.77
  25  -1 -37    5.09    0.97
 -14   0 -37   -0.16    0.44
 -12   0 -37    0.60    0.46
 -10   0 -37    0.60    0.46
  -8   0 -37    0.27    0.39
  -6   0 -37    0.14    0.38
  -4   0 -37    3.46    0.62
  -2   0 -37   -0.13    0.32
   0   0 -37    0.82    0.39
   2   0 -37    0.02    0.30
   4   0 -37    0.68    0.35
   6   0 -37    0.37    0.35
   8   0 -37   -0.05    0.31
  10   0 -37    0.13    0.34
  12   0 -37    0.44    0.36
  14   0 -37    0.33    0.40
  16   0 -37   -0.21    0.37
  18   0 -37   -0.30    0.37
  20   0 -37   -0.20    0.37
  22   0 -37    0.54    0.49
  24   0 -37    0.01    0.47
  26   0 -37    0.03    0.51
 -13   1 -37    1.28    0.57
 -11   1 -37    6.40    0.90
  -9   1 -37    1.34    0.53
  -7   1 -37    0.55    0.45
  -5   1 -37   33.85    2.14
  -3   1 -37    1.60    0.49
  -1   1 -37   26.42    1.77
   1   1 -37   16.54    1.21
   3   1 -37    0.39    0.35
   5   1 -37    6.00    0.74
   7   1 -37    3.56    0.61
   9   1 -37    0.41    0.38
  11   1 -37    0.20    0.36
  13   1 -37    6.72    0.85
  15   1 -37    4.17    0.71
  17   1 -37    4.89    0.75
  19   1 -37    0.54    0.47
  21   1 -37    7.31    0.97
  23   1 -37    2.21    0.70
 -12   2 -37    0.79    0.56
 -10   2 -37    1.07    0.53
  -8   2 -37   -0.15    0.41
  -6   2 -37   -0.03    0.38
  -4   2 -37    8.59    0.98
  -2   2 -37    1.73    0.54
   0   2 -37    7.92    0.86
   2   2 -37   57.07    3.03
   4   2 -37    5.11    0.71
   6   2 -37    1.23    0.45
   8   2 -37   11.32    1.03
  10   2 -37    1.45    0.46
  12   2 -37   10.42    1.01
  14   2 -37    0.79    0.44
  16   2 -37   -0.18    0.36
  18   2 -37    7.20    0.89
  20   2 -37    6.09    0.84
 -11   3 -37    0.18    0.51
  -9   3 -37   -0.22    0.43
  -7   3 -37    2.40    0.66
  -5   3 -37    0.63    0.48
  -3   3 -37    7.04    0.91
  -1   3 -37    0.89    0.46
   1   3 -37   16.33    1.28
   3   3 -37   11.91    1.12
   5   3 -37   18.20    1.40
   7   3 -37    6.59    0.81
   9   3 -37    1.11    0.45
  11   3 -37   -0.20    0.34
  13   3 -37    0.42    0.38
  15   3 -37   29.25    1.87
  17   3 -37   -0.59    0.30
 -10   4 -37   -0.19    0.43
  -8   4 -37    2.96    0.76
  -6   4 -37    8.06    1.07
  -4   4 -37    8.63    1.05
  -2   4 -37    7.31    0.95
   0   4 -37    1.14    0.51
   2   4 -37   -0.02    0.36
   4   4 -37    0.67    0.44
   6   4 -37    0.09    0.39
   8   4 -37    6.19    0.84
  10   4 -37    0.10    0.35
  12   4 -37    0.30    0.36
  14   4 -37    9.81    1.03
  -7   5 -37    6.58    1.05
  -5   5 -37    3.54    0.82
  -3   5 -37    6.95    0.99
  -1   5 -37   -0.09    0.44
   1   5 -37    0.35    0.48
   3   5 -37   -0.57    0.37
   5   5 -37    0.16    0.40
   7   5 -37    0.40    0.44
   9   5 -37    0.51    0.45
  11   5 -37    0.93    0.51
  -6   6 -37    0.05    0.54
  -4   6 -37    8.50    1.17
  -2   6 -37    0.93    0.61
   0   6 -37    3.97    0.83
   2   6 -37    0.11    0.45
   4   6 -37    0.46    0.51
   6   6 -37    2.14    0.67
   8   6 -37   -0.18    0.42
  -1   7 -37    0.05    0.53
   1   7 -37   -0.75    0.45
   3   7 -37    0.13    0.52
   5   7 -37    3.76    0.81
   9  -7 -36    3.51    0.79
  11  -7 -36    2.54    0.73
  13  -7 -36    9.29    1.19
  15  -7 -36    4.84    0.92
   6  -6 -36    0.48    0.44
   8  -6 -36    3.58    0.73
  10  -6 -36    0.39    0.48
  12  -6 -36    0.83    0.55
  14  -6 -36    9.41    1.12
  16  -6 -36    2.62    0.76
  18  -6 -36    2.35    0.70
   1  -5 -36    0.52    0.39
   3  -5 -36    1.57    0.51
   5  -5 -36    2.35    0.59
   7  -5 -36    1.40    0.53
   9  -5 -36    3.39    0.70
  11  -5 -36    1.10    0.55
  13  -5 -36    1.33    0.58
  15  -5 -36    0.62    0.50
  17  -5 -36    2.55    0.69
  19  -5 -36    0.93    0.53
  -2  -4 -36   -0.07    0.33
   0  -4 -36   -0.01    0.31
   2  -4 -36    0.46    0.36
   4  -4 -36   15.46    1.18
   6  -4 -36    0.65    0.41
   8  -4 -36    8.22    0.92
  10  -4 -36    0.41    0.43
  12  -4 -36   -0.32    0.35
  14  -4 -36    0.80    0.50
  16  -4 -36    3.39    0.75
  18  -4 -36   -0.09    0.39
  20  -4 -36    0.16    0.46
  22  -4 -36    1.08    0.57
  -5  -3 -36    0.55    0.38
  -3  -3 -36    0.98    0.43
  -1  -3 -36   24.40    1.55
   1  -3 -36   18.41    1.32
   3  -3 -36   43.86    2.53
   5  -3 -36    8.65    0.91
   7  -3 -36    1.97    0.53
   9  -3 -36   12.27    1.11
  11  -3 -36    0.48    0.43
  13  -3 -36    6.59    0.92
  15  -3 -36    2.96    0.68
  17  -3 -36    3.93    0.80
  19  -3 -36    0.72    0.54
  21  -3 -36    3.62    0.83
  23  -3 -36    0.15    0.54
  -8  -2 -36    6.64    0.79
  -6  -2 -36    0.09    0.36
  -4  -2 -36    6.35    0.76
  -2  -2 -36   16.29    1.24
   0  -2 -36   21.93    1.48
   2  -2 -36   29.29    1.74
   4  -2 -36  131.95    6.44
   6  -2 -36    7.63    0.81
   8  -2 -36  104.87    5.17
  10  -2 -36   18.42    1.40
  12  -2 -36    4.10    0.72
  14  -2 -36    1.86    0.60
  16  -2 -36    0.14    0.41
  18  -2 -36    0.50    0.46
  20  -2 -36    1.11    0.58
  22  -2 -36    9.32    1.17
  24  -2 -36    0.87    0.61
  26  -2 -36    1.59    0.69
 -11  -1 -36    0.57    0.46
  -9  -1 -36    0.27    0.40
  -7  -1 -36    7.46    0.86
  -5  -1 -36   33.66    2.00
  -3  -1 -36   16.80    1.23
  -1  -1 -36   16.04    1.18
   1  -1 -36    0.64    0.38
   3  -1 -36    9.35    0.92
   5  -1 -36    3.53    0.60
   7  -1 -36   24.58    1.58
   9  -1 -36    0.49    0.40
  11  -1 -36   29.97    1.87
  13  -1 -36   15.64    1.32
  15  -1 -36    1.06    0.49
  17  -1 -36   13.56    1.27
  19  -1 -36    1.02    0.58
  21  -1 -36    7.74    1.03
  23  -1 -36    3.54    0.82
  25  -1 -36    0.68    0.58
  27  -1 -36    5.32    1.01
 -14   0 -36    9.51    1.06
 -12   0 -36   12.68    1.16
 -10   0 -36   31.80    2.04
  -8   0 -36    1.04    0.47
  -6   0 -36    0.84    0.46
  -4   0 -36  137.13    6.52
  -2   0 -36    0.78    0.41
   0   0 -36   61.68    3.27
   2   0 -36   35.90    2.12
   4   0 -36    2.06    0.50
   6   0 -36    2.74    0.56
   8   0 -36    0.30    0.37
  10   0 -36   47.57    2.69
  12   0 -36   57.84    3.16
  14   0 -36   55.11    3.06
  16   0 -36    5.10    0.79
  18   0 -36    0.26    0.41
  20   0 -36    1.64    0.62
  22   0 -36    0.12    0.44
  24   0 -36    6.05    0.96
  26   0 -36    2.88    0.75
 -13   1 -36   -0.34    0.44
 -11   1 -36   -0.10    0.39
  -9   1 -36    0.13    0.40
  -7   1 -36    6.39    0.85
  -5   1 -36   31.62    2.03
  -3   1 -36   15.09    1.23
  -1   1 -36   16.33    1.22
   1   1 -36    1.33    0.43
   3   1 -36    9.45    0.93
   5   1 -36    1.61    0.47
   7   1 -36   22.61    1.54
   9   1 -36    1.08    0.44
  11   1 -36   27.62    1.79
  13   1 -36   18.08    1.32
  15   1 -36    0.24    0.39
  17   1 -36   12.85    1.18
  19   1 -36    1.05    0.53
  21   1 -36    7.09    0.93
  23   1 -36    2.39    0.70
 -12   2 -36   11.61    1.23
 -10   2 -36    3.22    0.71
  -8   2 -36    4.73    0.81
  -6   2 -36    0.41    0.43
  -4   2 -36    6.90    0.86
  -2   2 -36   19.82    1.41
   0   2 -36   24.68    1.61
   2   2 -36   26.72    1.74
   4   2 -36  139.27    6.50
   6   2 -36    4.55    0.71
   8   2 -36  104.00    5.12
  10   2 -36   19.13    1.35
  12   2 -36    4.22    0.69
  14   2 -36    0.99    0.46
  16   2 -36   -0.08    0.36
  18   2 -36    0.29    0.42
  20   2 -36    0.09    0.42
 -11   3 -36    0.07    0.47
  -9   3 -36    1.49    0.59
  -7   3 -36    0.74    0.49
  -5   3 -36    0.33    0.43
  -3   3 -36    1.32    0.49
  -1   3 -36   25.85    1.71
   1   3 -36   20.03    1.45
   3   3 -36   47.23    2.64
   5   3 -36    9.74    0.96
   7   3 -36    2.63    0.57
   9   3 -36   11.36    1.04
  11   3 -36    0.56    0.42
  13   3 -36    7.55    0.85
  15   3 -36    2.23    0.55
  17   3 -36    3.11    0.63
 -10   4 -36    5.51    0.94
  -8   4 -36    0.51    0.49
  -6   4 -36    4.79    0.84
  -4   4 -36    0.04    0.44
  -2   4 -36    0.90    0.50
   0   4 -36    0.84    0.46
   2   4 -36    0.13    0.40
   4   4 -36   14.74    1.23
   6   4 -36    0.23    0.38
   8   4 -36    8.26    0.92
  10   4 -36    0.50    0.40
  12   4 -36   -0.12    0.36
  14   4 -36    1.67    0.51
  -7   5 -36    1.86    0.68
  -5   5 -36   43.18    2.67
  -3   5 -36    0.51    0.50
  -1   5 -36    0.80    0.54
   1   5 -36    1.68    0.61
   3   5 -36    0.78    0.48
   5   5 -36    3.04    0.65
   7   5 -36    0.32    0.45
   9   5 -36    3.08    0.65
  11   5 -36    1.32    0.53
  -6   6 -36    0.88    0.66
  -4   6 -36    0.09    0.54
  -2   6 -36    2.02    0.70
   0   6 -36    4.93    0.87
   2   6 -36   15.79    1.44
   4   6 -36    0.09    0.47
   6   6 -36    0.09    0.44
   8   6 -36    4.00    0.75
  -1   7 -36   15.41    1.51
   1   7 -36    0.77    0.61
   3   7 -36    0.37    0.55
   5   7 -36    8.48    1.08
   9  -7 -35    1.01    0.53
  11  -7 -35    1.94    0.68
  13  -7 -35    3.28    0.76
  15  -7 -35    4.40    0.89
   6  -6 -35    0.40    0.40
   8  -6 -35    1.26    0.53
  10  -6 -35    1.93    0.63
  12  -6 -35    8.01    1.05
  14  -6 -35    4.03    0.82
  16  -6 -35   16.72    1.55
  18  -6 -35    0.31    0.47
   1  -5 -35    0.51    0.38
   3  -5 -35    5.18    0.72
   5  -5 -35    0.31    0.37
   7  -5 -35    1.97    0.56
   9  -5 -35    3.43    0.71
  11  -5 -35    6.79    0.93
  13  -5 -35   -0.12    0.40
  15  -5 -35    8.59    1.10
  17  -5 -35    3.49    0.80
  19  -5 -35    1.72    0.68
  21  -5 -35    5.75    1.00
  -2  -4 -35   -0.42    0.29
   0  -4 -35   -0.42    0.29
   2  -4 -35    0.12    0.35
   4  -4 -35    1.40    0.47
   6  -4 -35    0.37    0.39
   8  -4 -35    0.50    0.40
  10  -4 -35    0.00    0.37
  12  -4 -35    4.38    0.77
  14  -4 -35   15.68    1.42
  16  -4 -35    4.37    0.83
  18  -4 -35    0.53    0.48
  20  -4 -35    2.07    0.68
  22  -4 -35    3.06    0.81
  -5  -3 -35    0.95    0.43
  -3  -3 -35   -0.23    0.30
  -1  -3 -35    1.92    0.47
   1  -3 -35    0.30    0.34
   3  -3 -35    1.60    0.45
   5  -3 -35    7.59    0.86
   7  -3 -35   12.35    1.10
   9  -3 -35    0.62    0.41
  11  -3 -35    4.76    0.76
  13  -3 -35   -0.17    0.38
  15  -3 -35    3.75    0.75
  17  -3 -35    2.83    0.73
  19  -3 -35    0.39    0.48
  21  -3 -35    0.45    0.51
  23  -3 -35    4.58    0.94
  -8  -2 -35    4.44    0.68
  -6  -2 -35   -0.10    0.31
  -4  -2 -35    3.29    0.56
  -2  -2 -35    5.43    0.68
   0  -2 -35    1.76    0.46
   2  -2 -35   58.38    3.16
   4  -2 -35    1.42    0.44
   6  -2 -35    2.88    0.59
   8  -2 -35   28.75    1.85
  10  -2 -35    4.38    0.70
  12  -2 -35    0.25    0.38
  14  -2 -35    6.03    0.87
  16  -2 -35    5.21    0.84
  18  -2 -35    0.60    0.48
  20  -2 -35    8.87    1.12
  22  -2 -35    0.20    0.50
  24  -2 -35    1.54    0.68
  26  -2 -35    0.27    0.55
 -11  -1 -35    2.57    0.61
  -9  -1 -35    6.04    0.79
  -7  -1 -35   14.41    1.15
  -5  -1 -35    6.66    0.79
  -3  -1 -35   26.98    1.67
  -1  -1 -35    5.85    0.73
   1  -1 -35    6.00    0.70
   3  -1 -35    0.05    0.32
   5  -1 -35    4.32    0.65
   7  -1 -35   18.37    1.34
   9  -1 -35    9.31    0.98
  11  -1 -35    0.92    0.42
  13  -1 -35   31.19    1.96
  15  -1 -35    9.21    1.00
  17  -1 -35   -0.04    0.38
  19  -1 -35    0.65    0.53
  21  -1 -35    9.24    1.12
  23  -1 -35    4.52    0.86
  25  -1 -35    1.45    0.64
  27  -1 -35    2.45    0.79
 -14   0 -35    0.11    0.46
 -12   0 -35   -0.48    0.35
 -10   0 -35    0.32    0.41
  -8   0 -35   -0.14    0.33
  -6   0 -35    0.00    0.35
  -4   0 -35    3.95    0.64
  -2   0 -35    0.98    0.42
   2   0 -35    0.82    0.39
   4   0 -35    0.49    0.36
   6   0 -35    0.27    0.33
   8   0 -35   -0.21    0.32
  10   0 -35   -0.60    0.29
  12   0 -35   -0.41    0.32
  14   0 -35    0.89    0.46
  16   0 -35   -0.12    0.36
  18   0 -35   -0.19    0.38
  20   0 -35   -0.21    0.39
  22   0 -35    0.84    0.52
  24   0 -35   -0.11    0.46
  26   0 -35   -0.06    0.50
 -13   1 -35   22.96    1.76
 -11   1 -35    2.42    0.62
  -9   1 -35    5.52    0.81
  -7   1 -35   15.90    1.25
  -5   1 -35    7.51    0.87
  -3   1 -35   26.56    1.71
  -1   1 -35    6.63    0.79
   1   1 -35    5.32    0.70
   3   1 -35    0.71    0.37
   5   1 -35    5.43    0.69
   7   1 -35   21.42    1.39
   9   1 -35    9.87    0.96
  11   1 -35    0.78    0.40
  13   1 -35   29.63    1.87
  15   1 -35    6.75    0.85
  17   1 -35   -0.02    0.39
  19   1 -35    0.29    0.46
  21   1 -35    8.10    1.00
  23   1 -35    5.85    0.89
 -12   2 -35    3.27    0.74
 -10   2 -35   -0.10    0.38
  -8   2 -35    4.27    0.75
  -6   2 -35    0.33    0.43
  -4   2 -35    2.49    0.58
  -2   2 -35    6.02    0.79
   0   2 -35    1.75    0.49
   2   2 -35   58.68    3.22
   6   2 -35    3.27    0.60
   8   2 -35   28.75    1.81
  10   2 -35    3.58    0.62
  12   2 -35    0.44    0.39
  14   2 -35    8.58    0.90
  16   2 -35    4.71    0.71
  18   2 -35    0.17    0.36
  20   2 -35   11.29    1.08
 -11   3 -35    0.51    0.50
  -9   3 -35    4.44    0.83
  -7   3 -35   -0.22    0.36
  -5   3 -35    0.51    0.44
  -3   3 -35    0.09    0.38
  -1   3 -35    1.51    0.51
   1   3 -35   -0.14    0.34
   3   3 -35    0.98    0.46
   5   3 -35    9.17    0.94
   7   3 -35   13.01    1.06
   9   3 -35   -0.08    0.32
  11   3 -35    4.91    0.69
  13   3 -35    0.43    0.32
  15   3 -35    4.14    0.66
  17   3 -35    4.69    0.72
 -10   4 -35    4.68    0.90
  -8   4 -35    7.32    1.01
  -6   4 -35    5.68    0.89
  -4   4 -35   12.38    1.22
  -2   4 -35   -0.30    0.33
   0   4 -35    0.12    0.39
   2   4 -35    0.27    0.37
   4   4 -35    1.09    0.48
   6   4 -35    0.41    0.42
   8   4 -35    0.78    0.44
  10   4 -35    0.10    0.35
  12   4 -35    2.74    0.60
  14   4 -35   15.06    1.20
  -7   5 -35   12.14    1.32
  -5   5 -35    8.95    1.12
  -3   5 -35    0.69    0.53
  -1   5 -35    8.81    1.05
   1   5 -35   -0.01    0.37
   3   5 -35    5.46    0.82
   5   5 -35   -0.17    0.34
   7   5 -35    1.82    0.55
   9   5 -35    6.24    0.82
  11   5 -35    5.56    0.79
  -4   6 -35    5.46    0.97
  -2   6 -35    1.09    0.59
   0   6 -35   -0.24    0.43
   2   6 -35    0.81    0.52
   4   6 -35    0.12    0.47
   6   6 -35    0.21    0.46
   8   6 -35    1.36    0.55
  -1   7 -35    2.61    0.78
   1   7 -35    1.77    0.68
   3   7 -35   -0.11    0.47
  12  -8 -34    3.91    0.85
   9  -7 -34    0.55    0.50
  11  -7 -34    0.18    0.49
  13  -7 -34    4.16    0.85
  15  -7 -34    2.47    0.72
   4  -6 -34    0.49    0.42
   6  -6 -34   -0.07    0.37
   8  -6 -34    4.09    0.75
  10  -6 -34    2.79    0.70
  12  -6 -34    9.05    1.10
  14  -6 -34    4.51    0.85
  16  -6 -34   10.20    1.21
  18  -6 -34    5.80    1.02
   1  -5 -34    8.08    0.84
   3  -5 -34    6.34    0.78
   5  -5 -34    3.93    0.66
   7  -5 -34    0.22    0.37
   9  -5 -34    0.37    0.42
  11  -5 -34    0.32    0.47
  13  -5 -34    1.08    0.52
  15  -5 -34    3.02    0.74
  17  -5 -34    2.98    0.75
  19  -5 -34    3.08    0.79
  21  -5 -34    4.09    0.88
  -2  -4 -34   -0.22    0.28
   0  -4 -34    7.60    0.78
   2  -4 -34    1.81    0.48
   4  -4 -34   22.45    1.54
   6  -4 -34   -0.03    0.35
   8  -4 -34   10.67    1.06
  10  -4 -34    0.50    0.46
  12  -4 -34    3.80    0.73
  14  -4 -34   11.57    1.14
  16  -4 -34    7.07    0.96
  18  -4 -34    0.30    0.46
  20  -4 -34    2.07    0.69
  22  -4 -34    0.10    0.52
  -5  -3 -34    3.81    0.60
  -3  -3 -34    6.74    0.71
  -1  -3 -34    3.74    0.56
   1  -3 -34    7.90    0.81
   3  -3 -34    3.84    0.61
   5  -3 -34    5.29    0.71
   7  -3 -34    0.31    0.37
   9  -3 -34    6.20    0.79
  11  -3 -34    2.24    0.59
  13  -3 -34    2.37    0.61
  15  -3 -34   13.29    1.24
  17  -3 -34    0.45    0.46
  19  -3 -34    4.18    0.82
  21  -3 -34    3.43    0.77
  23  -3 -34    4.21    0.89
  25  -3 -34    0.26    0.54
  -8  -2 -34    0.54    0.40
  -6  -2 -34    6.83    0.78
  -4  -2 -34    2.80    0.54
  -2  -2 -34    3.01    0.54
   0  -2 -34    8.77    0.82
   2  -2 -34   20.43    1.38
   4  -2 -34   -0.17    0.31
   6  -2 -34    4.15    0.66
   8  -2 -34    0.93    0.44
  10  -2 -34    5.48    0.76
  12  -2 -34   10.68    1.06
  14  -2 -34    9.31    1.04
  16  -2 -34    4.54    0.78
  18  -2 -34    0.62    0.49
  20  -2 -34    2.46    0.73
  22  -2 -34    2.54    0.73
  24  -2 -34    1.39    0.59
  26  -2 -34    0.16    0.51
 -11  -1 -34    0.17    0.39
  -9  -1 -34   10.70    1.02
  -7  -1 -34    0.08    0.35
  -5  -1 -34    0.51    0.39
  -3  -1 -34    2.31    0.49
  -1  -1 -34    0.21    0.33
   1  -1 -34    0.22    0.34
   3  -1 -34    0.50    0.36
   5  -1 -34   14.67    1.12
   7  -1 -34   16.31    1.23
   9  -1 -34   39.05    2.24
  11  -1 -34    5.44    0.76
  13  -1 -34   60.97    3.20
  15  -1 -34   12.28    1.14
  17  -1 -34    8.58    1.01
  19  -1 -34    0.87    0.54
  21  -1 -34    0.58    0.50
  23  -1 -34    0.90    0.56
  25  -1 -34    4.15    0.88
  27  -1 -34    0.60    0.59
 -14   0 -34   12.45    1.18
 -12   0 -34    5.55    0.79
 -10   0 -34   22.54    1.62
  -8   0 -34    0.55    0.43
  -6   0 -34   37.46    2.23
  -4   0 -34    1.36    0.46
  -2   0 -34   44.85    2.51
   0   0 -34   54.81    2.91
   2   0 -34    0.91    0.41
   4   0 -34   66.57    3.48
   6   0 -34   12.35    1.02
   8   0 -34   42.82    2.38
  10   0 -34    7.06    0.81
  12   0 -34   26.76    1.72
  14   0 -34    6.67    0.88
  16   0 -34    1.14    0.48
  18   0 -34    9.90    1.07
  20   0 -34    0.54    0.46
  22   0 -34   13.53    1.31
  24   0 -34    5.57    0.92
  26   0 -34    0.78    0.60
 -13   1 -34    6.94    0.91
 -11   1 -34   -0.57    0.31
  -9   1 -34   12.66    1.15
  -7   1 -34    0.15    0.38
  -5   1 -34    0.17    0.36
  -3   1 -34    1.20    0.46
  -1   1 -34    0.16    0.35
   1   1 -34    0.29    0.34
   3   1 -34    0.16    0.33
   5   1 -34   15.14    1.12
   7   1 -34   17.75    1.25
   9   1 -34   36.77    2.18
  11   1 -34    6.18    0.77
  13   1 -34   60.67    3.12
  15   1 -34   12.32    1.09
  17   1 -34    6.64    0.87
  19   1 -34    1.61    0.56
  21   1 -34    0.81    0.46
  23   1 -34    1.12    0.54
 -12   2 -34    5.54    0.89
 -10   2 -34    5.44    0.83
  -8   2 -34    1.09    0.48
  -6   2 -34    7.33    0.91
  -4   2 -34    3.77    0.66
  -2   2 -34    4.76    0.72
   0   2 -34    8.81    0.89
   2   2 -34   22.52    1.46
   4   2 -34   -0.40    0.28
   6   2 -34    5.43    0.71
   8   2 -34    0.48    0.35
  10   2 -34    4.86    0.68
  12   2 -34   10.36    0.99
  14   2 -34    9.30    0.94
  16   2 -34    2.89    0.59
  18   2 -34    0.17    0.37
  20   2 -34    1.79    0.56
 -11   3 -34    1.03    0.55
  -9   3 -34    0.26    0.43
  -7   3 -34    0.38    0.43
  -5   3 -34    4.47    0.76
  -3   3 -34    5.47    0.78
  -1   3 -34    2.54    0.60
   1   3 -34    8.77    0.95
   3   3 -34    5.26    0.74
   5   3 -34    5.19    0.70
   7   3 -34    0.10    0.34
   9   3 -34    4.63    0.70
  11   3 -34    1.82    0.50
  13   3 -34    2.08    0.51
  15   3 -34   10.19    1.00
  17   3 -34    0.46    0.38
 -10   4 -34    9.23    1.16
  -8   4 -34    0.53    0.53
  -6   4 -34    2.62    0.66
  -4   4 -34   -0.12    0.39
  -2   4 -34   -0.04    0.38
   0   4 -34    6.50    0.86
   2   4 -34    1.67    0.53
   4   4 -34   23.87    1.62
   6   4 -34   -0.04    0.33
   8   4 -34   11.13    1.04
  10   4 -34    0.64    0.41
  12   4 -34    4.49    0.68
  14   4 -34    8.02    0.88
  -7   5 -34    0.24    0.47
  -5   5 -34   32.70    2.16
  -3   5 -34   -0.02    0.42
  -1   5 -34    3.54    0.74
   1   5 -34    9.19    1.04
   3   5 -34    6.72    0.88
   5   5 -34    4.45    0.74
   7   5 -34    0.43    0.41
   9   5 -34   -0.28    0.36
  11   5 -34    0.73    0.45
  -4   6 -34    4.72    0.90
  -2   6 -34    3.93    0.81
   0   6 -34    3.31    0.78
   2   6 -34    9.31    1.10
   4   6 -34    1.16    0.52
   6   6 -34    0.00    0.41
   8   6 -34    2.87    0.66
  18   6 -34    8.54    1.16
  -1   7 -34    1.20    0.65
   1   7 -34    3.18    0.77
   3   7 -34    3.50    0.75
  15   7 -34    1.98    0.74
  12  -8 -33   11.48    1.27
  14  -8 -33    3.31    0.84
   9  -7 -33    0.00    0.44
  11  -7 -33    0.09    0.45
  13  -7 -33    3.38    0.80
  15  -7 -33    1.83    0.69
  17  -7 -33    1.22    0.64
   4  -6 -33    6.13    0.79
   6  -6 -33   12.22    1.13
   8  -6 -33    1.45    0.54
  10  -6 -33    1.69    0.59
  12  -6 -33    4.38    0.79
  14  -6 -33    0.46    0.50
  16  -6 -33    7.56    1.07
  18  -6 -33    2.40    0.75
   1  -5 -33    0.26    0.35
   3  -5 -33    1.23    0.44
   5  -5 -33    0.15    0.34
   7  -5 -33    0.43    0.41
   9  -5 -33    1.78    0.57
  11  -5 -33    0.07    0.43
  13  -5 -33    5.96    0.89
  15  -5 -33    0.19    0.43
  17  -5 -33    0.22    0.45
  19  -5 -33    1.54    0.62
  21  -5 -33    1.25    0.62
  -2  -4 -33    0.27    0.33
   0  -4 -33    0.03    0.30
   2  -4 -33    4.63    0.64
   4  -4 -33    0.72    0.40
   6  -4 -33    0.02    0.36
   8  -4 -33    0.93    0.43
  10  -4 -33    0.23    0.40
  12  -4 -33    2.03    0.62
  14  -4 -33    0.83    0.48
  16  -4 -33    4.14    0.78
  18  -4 -33    0.64    0.48
  20  -4 -33   -0.11    0.46
  22  -4 -33    2.23    0.74
  24  -4 -33    1.25    0.62
  -5  -3 -33    7.38    0.78
  -3  -3 -33   18.21    1.23
  -1  -3 -33   21.40    1.37
   1  -3 -33    2.38    0.49
   3  -3 -33    4.24    0.61
   5  -3 -33   12.47    1.03
   7  -3 -33   46.07    2.66
   9  -3 -33    0.98    0.45
  11  -3 -33   23.59    1.65
  13  -3 -33    8.23    0.96
  15  -3 -33    6.54    0.90
  17  -3 -33    3.47    0.76
  19  -3 -33    5.18    0.86
  21  -3 -33    8.37    1.09
  23  -3 -33    1.95    0.69
  25  -3 -33    0.36    0.56
  -8  -2 -33    2.74    0.57
  -6  -2 -33    9.96    0.90
  -4  -2 -33    0.04    0.30
  -2  -2 -33    0.87    0.38
   0  -2 -33    5.67    0.68
   2  -2 -33    0.85    0.37
   4  -2 -33   11.31    0.96
   6  -2 -33    3.61    0.63
   8  -2 -33    2.24    0.56
  10  -2 -33    2.14    0.56
  12  -2 -33    2.45    0.60
  14  -2 -33    5.11    0.80
  16  -2 -33   20.07    1.55
  18  -2 -33   12.04    1.23
  20  -2 -33    5.51    0.91
  22  -2 -33    6.05    0.98
  24  -2 -33    7.66    1.09
  26  -2 -33    2.01    0.69
 -11  -1 -33    4.72    0.72
  -9  -1 -33    0.47    0.38
  -7  -1 -33   26.22    1.63
  -5  -1 -33   11.98    1.03
  -3  -1 -33    1.70    0.47
  -1  -1 -33    0.11    0.33
   1  -1 -33   13.02    1.01
   3  -1 -33   11.16    0.95
   5  -1 -33   13.26    1.03
   7  -1 -33   46.45    2.48
   9  -1 -33    9.82    0.96
  11  -1 -33    8.04    0.92
  13  -1 -33   27.96    1.72
  15  -1 -33    0.14    0.39
  17  -1 -33    1.63    0.57
  19  -1 -33   -0.23    0.42
  21  -1 -33    2.39    0.70
  23  -1 -33    0.31    0.49
  25  -1 -33    2.76    0.74
  27  -1 -33    3.59    0.85
 -14   0 -33    0.39    0.45
 -12   0 -33    0.01    0.39
 -10   0 -33    0.28    0.39
  -8   0 -33   -0.46    0.30
  -6   0 -33    0.69    0.41
  -4   0 -33   -0.03    0.33
  -2   0 -33    1.70    0.48
   0   0 -33    1.92    0.47
   2   0 -33   -0.15    0.29
   6   0 -33   -0.01    0.33
   8   0 -33    0.26    0.34
  10   0 -33    0.19    0.36
  12   0 -33    0.27    0.40
  14   0 -33    0.28    0.39
  16   0 -33    0.41    0.41
  18   0 -33   -0.10    0.39
  20   0 -33    0.17    0.44
  22   0 -33    0.31    0.50
  24   0 -33    0.44    0.50
  26   0 -33    0.24    0.53
 -13   1 -33    1.20    0.56
 -11   1 -33    4.37    0.73
  -9   1 -33    0.17    0.37
  -7   1 -33   25.28    1.68
  -5   1 -33   12.31    1.11
  -3   1 -33    2.33    0.53
  -1   1 -33    0.65    0.38
   1   1 -33   12.16    1.03
   3   1 -33   12.60    1.00
   5   1 -33   13.03    1.02
   7   1 -33   44.81    2.46
   9   1 -33   10.55    0.96
  11   1 -33    9.94    0.93
  13   1 -33   21.92    1.56
  15   1 -33    0.12    0.36
  17   1 -33    3.66    0.68
  19   1 -33    0.67    0.45
  21   1 -33    1.48    0.56
  23   1 -33    0.60    0.47
 -12   2 -33   16.06    1.42
 -10   2 -33    3.52    0.71
  -8   2 -33    3.47    0.67
  -6   2 -33    6.53    0.88
  -4   2 -33    0.59    0.37
  -2   2 -33   -0.14    0.35
   0   2 -33    4.91    0.70
   2   2 -33    0.90    0.40
   4   2 -33    9.95    0.93
   6   2 -33    2.95    0.57
   8   2 -33    1.73    0.47
  10   2 -33    1.06    0.43
  12   2 -33    2.28    0.53
  14   2 -33    5.00    0.70
  16   2 -33   18.53    1.40
  18   2 -33   11.62    1.06
  20   2 -33    5.56    0.78
 -11   3 -33    0.10    0.45
  -9   3 -33    7.90    0.99
  -7   3 -33    3.65    0.70
  -5   3 -33    9.07    1.00
  -3   3 -33   16.10    1.34
  -1   3 -33   21.76    1.50
   1   3 -33    2.12    0.55
   3   3 -33    3.25    0.62
   5   3 -33   11.51    1.03
   7   3 -33   48.00    2.66
   9   3 -33    0.50    0.41
  11   3 -33   22.48    1.51
  13   3 -33    7.18    0.81
  15   3 -33    6.73    0.81
  17   3 -33    4.23    0.67
 -10   4 -33    0.83    0.55
  -8   4 -33    0.23    0.48
  -6   4 -33   10.03    1.12
  -4   4 -33   18.28    1.46
  -2   4 -33    1.43    0.55
   0   4 -33    0.68    0.45
   2   4 -33    4.64    0.71
   4   4 -33   -0.01    0.34
   6   4 -33    0.21    0.37
   8   4 -33    0.60    0.39
  10   4 -33   -0.09    0.31
  12   4 -33    2.57    0.57
  14   4 -33   -0.02    0.35
  -7   5 -33    0.22    0.49
  -5   5 -33    0.72    0.55
  -3   5 -33    2.51    0.68
  -1   5 -33    0.44    0.43
   1   5 -33   -0.24    0.38
   3   5 -33    0.83    0.47
   5   5 -33    0.30    0.39
   7   5 -33    0.28    0.39
   9   5 -33    1.18    0.49
  11   5 -33    0.96    0.47
  19   5 -33    0.78    0.57
  21   5 -33    1.23    0.63
  -4   6 -33   10.04    1.19
  -2   6 -33    1.03    0.57
   0   6 -33    1.63    0.61
   2   6 -33    0.12    0.45
   4   6 -33    7.51    0.96
   6   6 -33   13.78    1.23
   8   6 -33    1.38    0.56
  16   6 -33    8.60    1.10
  18   6 -33    1.39    0.64
  -1   7 -33    3.88    0.86
   1   7 -33    0.24    0.50
   3   7 -33   17.84    1.46
  13   7 -33    4.45    0.87
  15   7 -33    1.92    0.70
  12  -8 -32   11.67    1.29
  14  -8 -32    1.32    0.64
   9  -7 -32    3.75    0.75
  11  -7 -32    0.21    0.47
  13  -7 -32    1.47    0.65
  15  -7 -32    4.48    0.91
  17  -7 -32    0.80    0.58
   4  -6 -32    5.67    0.76
   6  -6 -32    0.42    0.43
   8  -6 -32   10.22    1.08
  10  -6 -32    2.73    0.67
  12  -6 -32    9.67    1.11
  14  -6 -32   -0.01    0.45
  16  -6 -32    4.04    0.84
  18  -6 -32    0.63    0.53
  20  -6 -32    2.27    0.70
   1  -5 -32    7.71    0.80
   3  -5 -32    2.26    0.55
   5  -5 -32   -0.01    0.35
   7  -5 -32    0.58    0.42
   9  -5 -32    0.88    0.52
  11  -5 -32    0.54    0.45
  13  -5 -32    0.79    0.47
  15  -5 -32    3.10    0.75
  17  -5 -32    6.65    1.00
  19  -5 -32    1.19    0.60
  21  -5 -32    0.18    0.51
  -2  -4 -32    2.87    0.53
   0  -4 -32   49.34    2.74
   2  -4 -32   15.06    1.14
   4  -4 -32    2.32    0.53
   6  -4 -32    8.47    0.88
   8  -4 -32    1.12    0.47
  10  -4 -32    5.89    0.82
  12  -4 -32    1.17    0.53
  14  -4 -32   15.48    1.34
  16  -4 -32    0.57    0.47
  18  -4 -32    3.71    0.79
  20  -4 -32    0.35    0.52
  22  -4 -32    0.70    0.59
  24  -4 -32    2.51    0.79
  -5  -3 -32    4.01    0.58
  -3  -3 -32    0.78    0.34
  -1  -3 -32    2.74    0.50
   1  -3 -32    4.79    0.64
   3  -3 -32    6.50    0.74
   5  -3 -32    0.06    0.34
   7  -3 -32   30.06    1.92
   9  -3 -32   21.82    1.50
  11  -3 -32    7.68    0.90
  13  -3 -32   35.47    2.06
  15  -3 -32   10.09    1.08
  17  -3 -32    3.10    0.70
  19  -3 -32    1.10    0.54
  21  -3 -32    2.03    0.65
  23  -3 -32    1.48    0.66
  25  -3 -32   15.47    1.56
  -8  -2 -32    0.78    0.39
  -6  -2 -32    4.61    0.63
  -4  -2 -32    1.61    0.45
  -2  -2 -32    3.52    0.55
   0  -2 -32   16.50    1.16
   2  -2 -32    4.68    0.63
   4  -2 -32    7.26    0.77
   6  -2 -32    1.57    0.48
   8  -2 -32    4.14    0.67
  10  -2 -32   26.50    1.74
  12  -2 -32    0.09    0.40
  14  -2 -32    2.40    0.61
  16  -2 -32    6.33    0.90
  18  -2 -32    0.61    0.46
  20  -2 -32   15.47    1.39
  22  -2 -32   -0.17    0.42
  24  -2 -32    9.73    1.15
  26  -2 -32    5.07    0.97
 -11  -1 -32   11.06    1.01
  -9  -1 -32    2.12    0.52
  -7  -1 -32   17.91    1.29
  -5  -1 -32    4.41    0.64
  -3  -1 -32   15.35    1.12
  -1  -1 -32   14.78    1.11
   1  -1 -32    0.59    0.36
   3  -1 -32    0.79    0.38
   5  -1 -32   17.28    1.23
   7  -1 -32    2.65    0.53
   9  -1 -32    5.53    0.73
  11  -1 -32    0.78    0.43
  13  -1 -32    1.17    0.52
  15  -1 -32    3.85    0.70
  17  -1 -32   12.76    1.19
  19  -1 -32    4.05    0.75
  21  -1 -32   11.83    1.22
  23  -1 -32    1.75    0.66
  25  -1 -32    0.70    0.58
  27  -1 -32    0.68    0.56
 -14   0 -32    1.63    0.56
 -12   0 -32   18.79    1.43
 -10   0 -32   -0.12    0.37
  -8   0 -32   38.13    2.25
  -6   0 -32   69.60    3.66
  -4   0 -32    1.84    0.50
  -2   0 -32    9.82    0.91
   0   0 -32    8.14    0.81
   2   0 -32    2.43    0.49
   4   0 -32    1.99    0.47
   6   0 -32    0.31    0.34
   8   0 -32    8.30    0.84
  10   0 -32    0.27    0.38
  12   0 -32   18.32    1.33
  14   0 -32   -0.01    0.35
  16   0 -32    2.83    0.63
  18   0 -32    0.09    0.41
  20   0 -32   10.58    1.13
  22   0 -32   12.16    1.22
  24   0 -32   -0.50    0.42
  26   0 -32    5.19    0.91
 -13   1 -32    5.26    0.79
 -11   1 -32    6.90    0.92
  -9   1 -32    1.91    0.55
  -7   1 -32   18.00    1.35
  -5   1 -32    3.41    0.62
  -3   1 -32   15.23    1.16
  -1   1 -32   16.11    1.18
   1   1 -32    0.81    0.38
   3   1 -32    0.80    0.38
   5   1 -32   16.02    1.20
   7   1 -32    1.48    0.44
   9   1 -32    4.35    0.65
  11   1 -32    0.18    0.35
  13   1 -32    2.35    0.55
  15   1 -32    3.73    0.65
  17   1 -32   11.33    1.08
  19   1 -32    3.72    0.68
  21   1 -32   11.36    1.12
  23   1 -32    1.63    0.57
 -12   2 -32    3.34    0.70
 -10   2 -32   22.91    1.67
  -8   2 -32    0.71    0.46
  -6   2 -32    4.55    0.71
  -4   2 -32    1.96    0.54
  -2   2 -32    3.51    0.61
   0   2 -32   15.88    1.21
   2   2 -32    6.18    0.72
   4   2 -32    6.67    0.76
   6   2 -32    1.27    0.43
   8   2 -32    4.62    0.65
  10   2 -32   24.59    1.65
  12   2 -32    0.14    0.33
  14   2 -32    2.68    0.55
  16   2 -32    7.85    0.86
  18   2 -32    0.45    0.38
  20   2 -32   13.80    1.21
 -11   3 -32   13.88    1.31
  -9   3 -32    7.49    0.95
  -7   3 -32    1.31    0.51
  -5   3 -32    3.54    0.68
  -3   3 -32   -0.14    0.33
  -1   3 -32    2.36    0.56
   1   3 -32    4.81    0.72
   3   3 -32    7.23    0.81
   5   3 -32   -0.14    0.32
   7   3 -32   30.73    1.90
   9   3 -32   21.96    1.44
  11   3 -32    5.94    0.74
  13   3 -32   27.45    1.78
  15   3 -32   10.03    0.94
  17   3 -32    4.26    0.67
 -10   4 -32   -0.13    0.44
  -8   4 -32    2.71    0.69
  -6   4 -32    0.18    0.42
  -4   4 -32   70.88    3.84
  -2   4 -32    3.45    0.69
   0   4 -32   54.68    2.97
   2   4 -32   15.19    1.23
   4   4 -32    2.15    0.56
   6   4 -32    7.63    0.84
   8   4 -32    0.59    0.39
  10   4 -32    5.79    0.74
  12   4 -32    1.34    0.45
  14   4 -32   15.75    1.22
  -7   5 -32    1.11    0.59
  -5   5 -32   -0.17    0.41
  -3   5 -32   15.63    1.40
  -1   5 -32    0.25    0.44
   1   5 -32    8.76    0.98
   3   5 -32    3.30    0.66
   5   5 -32   -0.22    0.37
   7   5 -32    0.86    0.44
   9   5 -32    0.44    0.39
  11   5 -32    0.13    0.38
  15   5 -32    3.49    0.73
  17   5 -32    8.01    1.00
  19   5 -32    0.84    0.52
  21   5 -32   -0.19    0.56
  -4   6 -32    0.36    0.54
  -2   6 -32   32.92    2.18
   0   6 -32    0.72    0.51
   2   6 -32   12.35    1.21
   4   6 -32    6.60    0.87
   6   6 -32    0.13    0.41
   8   6 -32   12.20    1.10
  14   6 -32    0.04    0.44
  16   6 -32    2.03    0.64
  18   6 -32   -0.35    0.49
  20   6 -32    0.91    0.64
  -1   7 -32    3.16    0.81
   1   7 -32    0.15    0.46
   3   7 -32    0.00    0.47
  11   7 -32   -0.23    0.44
  13   7 -32    2.01    0.66
  15   7 -32    3.67    0.83
  17   7 -32    0.21    0.57
  12   8 -32   13.51    1.38
  12  -8 -31    3.91    0.86
  14  -8 -31    1.40    0.64
   7  -7 -31    7.62    0.96
   9  -7 -31    1.63    0.59
  11  -7 -31    3.58    0.80
  13  -7 -31   25.21    1.89
  15  -7 -31    2.38    0.72
  17  -7 -31    4.58    0.91
   4  -6 -31    2.58    0.59
   6  -6 -31    0.45    0.42
   8  -6 -31    0.25    0.41
  10  -6 -31    0.29    0.44
  12  -6 -31    0.89    0.51
  14  -6 -31    0.03    0.46
  16  -6 -31    6.74    0.99
  18  -6 -31    1.96    0.68
  20  -6 -31    0.50    0.54
   1  -5 -31    8.61    0.83
   3  -5 -31    1.19    0.45
   5  -5 -31    2.82    0.59
   7  -5 -31    6.46    0.82
   9  -5 -31    2.60    0.61
  11  -5 -31    1.33    0.54
  13  -5 -31   -0.01    0.42
  15  -5 -31    8.56    1.08
  17  -5 -31    0.71    0.50
  19  -5 -31    0.91    0.53
  21  -5 -31    0.00    0.46
  -2  -4 -31   -0.29    0.28
   0  -4 -31    0.94    0.37
   2  -4 -31    4.98    0.66
   4  -4 -31    1.75    0.47
   6  -4 -31   20.60    1.38
   8  -4 -31    5.69    0.78
  10  -4 -31   10.76    1.10
  12  -4 -31   23.99    1.63
  14  -4 -31    6.53    0.88
  16  -4 -31   10.51    1.15
  18  -4 -31    9.15    1.10
  20  -4 -31    0.72    0.55
  22  -4 -31    0.65    0.56
  24  -4 -31    1.42    0.65
  -5  -3 -31    0.44    0.35
  -3  -3 -31    5.48    0.62
  -1  -3 -31   16.12    1.16
   1  -3 -31   10.15    0.89
   3  -3 -31   27.04    1.70
   5  -3 -31   15.17    1.18
   7  -3 -31    0.52    0.41
   9  -3 -31    0.17    0.39
  11  -3 -31    2.48    0.61
  13  -3 -31   41.82    2.35
  15  -3 -31    3.16    0.68
  17  -3 -31    0.54    0.44
  19  -3 -31   -0.03    0.47
  21  -3 -31    0.16    0.47
  23  -3 -31   -0.33    0.47
  25  -3 -31    1.25    0.66
  -8  -2 -31    3.20    0.55
  -6  -2 -31   22.25    1.44
  -4  -2 -31    0.23    0.33
  -2  -2 -31    0.06    0.31
   0  -2 -31   -0.09    0.29
   2  -2 -31    0.13    0.32
   6  -2 -31    0.12    0.33
   8  -2 -31    1.26    0.48
  10  -2 -31    3.39    0.64
  12  -2 -31    0.28    0.41
  14  -2 -31    2.23    0.60
  16  -2 -31    0.17    0.42
  18  -2 -31    0.27    0.43
  20  -2 -31    1.65    0.63
  22  -2 -31    3.83    0.80
  24  -2 -31    3.58    0.81
  26  -2 -31    2.87    0.80
  28  -2 -31    2.82    0.80
 -13  -1 -31   15.97    1.23
 -11  -1 -31    3.36    0.60
  -9  -1 -31    0.03    0.35
  -7  -1 -31    4.01    0.62
  -5  -1 -31    0.29    0.36
  -3  -1 -31   21.07    1.37
  -1  -1 -31    0.42    0.33
   1  -1 -31   27.83    1.67
   3  -1 -31   10.92    0.89
   5  -1 -31    1.12    0.41
   7  -1 -31   23.78    1.43
   9  -1 -31    2.56    0.56
  11  -1 -31    1.70    0.53
  13  -1 -31   43.19    2.46
  15  -1 -31   22.04    1.55
  17  -1 -31   12.67    1.21
  19  -1 -31   -0.25    0.43
  21  -1 -31    8.23    1.04
  23  -1 -31    0.01    0.49
  25  -1 -31    4.33    0.87
  27  -1 -31    2.24    0.75
  29  -1 -31   -0.26    0.50
 -14   0 -31   -0.35    0.36
 -12   0 -31    0.04    0.35
 -10   0 -31   -0.10    0.36
  -8   0 -31    0.25    0.36
  -6   0 -31    1.12    0.41
  -4   0 -31    0.23    0.34
  -2   0 -31    0.18    0.33
   0   0 -31    0.54    0.34
   2   0 -31   -0.13    0.28
   4   0 -31    0.10    0.30
   6   0 -31   -0.33    0.27
   8   0 -31    0.17    0.34
  10   0 -31   -0.07    0.32
  12   0 -31   -0.08    0.35
  14   0 -31    0.10    0.37
  16   0 -31    0.47    0.41
  18   0 -31    0.47    0.46
  20   0 -31    0.22    0.46
  22   0 -31    0.08    0.46
  24   0 -31    0.81    0.53
  26   0 -31    0.41    0.49
 -13   1 -31   15.86    1.30
 -11   1 -31    2.14    0.59
  -9   1 -31   -0.04    0.36
  -7   1 -31    5.98    0.75
  -5   1 -31    0.04    0.38
  -3   1 -31   20.91    1.41
  -1   1 -31    0.42    0.34
   1   1 -31   29.01    1.71
   3   1 -31    8.54    0.84
   5   1 -31    0.73    0.39
   7   1 -31   20.31    1.36
   9   1 -31    2.96    0.55
  11   1 -31    1.97    0.51
  13   1 -31   44.68    2.40
  15   1 -31   20.55    1.46
  17   1 -31   15.58    1.17
  19   1 -31    0.21    0.41
  21   1 -31    9.02    0.98
  23   1 -31    0.93    0.51
 -12   2 -31    0.49    0.48
 -10   2 -31    0.74    0.47
  -8   2 -31    1.81    0.56
  -6   2 -31   21.88    1.56
  -4   2 -31    0.44    0.40
  -2   2 -31    1.28    0.45
   0   2 -31    0.43    0.36
   2   2 -31   -0.04    0.32
   4   2 -31   44.12    2.38
   6   2 -31    0.33    0.34
   8   2 -31    1.39    0.44
  10   2 -31    2.84    0.54
  12   2 -31   -0.28    0.29
  14   2 -31    3.42    0.57
  16   2 -31    0.17    0.35
  18   2 -31    0.35    0.38
  20   2 -31    3.92    0.66
 -11   3 -31    0.41    0.44
  -9   3 -31    1.65    0.56
  -7   3 -31    4.03    0.70
  -5   3 -31    0.96    0.48
  -3   3 -31    4.12    0.70
  -1   3 -31   18.89    1.33
   1   3 -31   11.33    1.02
   3   3 -31   29.57    1.79
   5   3 -31   16.37    1.21
   7   3 -31    0.29    0.36
   9   3 -31   -0.01    0.33
  11   3 -31    3.07    0.55
  13   3 -31   34.04    2.11
  15   3 -31    3.11    0.56
  17   3 -31    0.08    0.34
 -10   4 -31    2.45    0.70
  -8   4 -31    0.65    0.54
  -6   4 -31    6.29    0.87
  -4   4 -31   25.96    1.77
  -2   4 -31    0.02    0.37
   0   4 -31    0.96    0.46
   2   4 -31    5.71    0.75
   4   4 -31    1.40    0.49
   6   4 -31   19.33    1.35
   8   4 -31    5.93    0.74
  10   4 -31   12.52    1.01
  12   4 -31   23.34    1.48
  14   4 -31    3.87    0.66
  18   4 -31    8.12    0.99
  20   4 -31    0.35    0.53
  22   4 -31    0.04    0.47
  24   4 -31    1.32    0.67
  -7   5 -31    0.87    0.55
  -5   5 -31    0.14    0.47
  -3   5 -31   34.40    2.23
  -1   5 -31   -0.11    0.36
   1   5 -31    8.90    0.99
   3   5 -31    1.80    0.55
   5   5 -31    1.46    0.52
   7   5 -31    7.40    0.83
   9   5 -31    2.02    0.53
  11   5 -31    1.49    0.49
  13   5 -31    0.26    0.42
  15   5 -31   10.60    1.09
  17   5 -31   -0.10    0.46
  19   5 -31    0.58    0.54
  21   5 -31   -0.10    0.46
  23   5 -31    1.99    0.73
  -4   6 -31    0.19    0.46
  -2   6 -31    2.66    0.70
   0   6 -31    0.50    0.47
   2   6 -31    2.49    0.62
   4   6 -31    2.25    0.62
   6   6 -31    0.29    0.42
   8   6 -31   -0.26    0.34
  12   6 -31    0.09    0.42
  14   6 -31    0.39    0.48
  16   6 -31    5.36    0.91
  18   6 -31    0.37    0.55
  20   6 -31    0.24    0.55
   1   7 -31   -0.22    0.41
   3   7 -31    3.46    0.74
  11   7 -31    2.93    0.72
  13   7 -31   26.49    1.91
  15   7 -31    2.25    0.75
  17   7 -31    5.96    0.99
  10   8 -31    2.16    0.71
  12   8 -31    1.97    0.70
  14   8 -31    1.29    0.69
  12  -8 -30    1.16    0.62
  14  -8 -30    4.85    0.93
   7  -7 -30    4.97    0.81
   9  -7 -30    1.44    0.56
  11  -7 -30    1.35    0.60
  13  -7 -30    2.06    0.65
  15  -7 -30    1.31    0.61
  17  -7 -30    5.09    0.92
   4  -6 -30    0.26    0.40
   6  -6 -30    0.35    0.41
   8  -6 -30    0.68    0.44
  10  -6 -30    0.65    0.49
  12  -6 -30    2.26    0.66
  14  -6 -30    4.39    0.83
  16  -6 -30    1.89    0.62
  18  -6 -30    2.04    0.67
  20  -6 -30    1.07    0.61
   1  -5 -30    5.54    0.69
   3  -5 -30    0.09    0.34
   5  -5 -30    3.76    0.63
   7  -5 -30    9.57    1.00
   9  -5 -30    9.18    0.98
  11  -5 -30    4.64    0.76
  13  -5 -30    6.60    0.91
  15  -5 -30   32.54    2.16
  17  -5 -30    1.13    0.56
  19  -5 -30   14.66    1.47
  21  -5 -30    9.46    1.16
  23  -5 -30    5.52    0.97
  -2  -4 -30   16.51    1.13
   0  -4 -30   13.28    1.00
   2  -4 -30    6.47    0.75
   4  -4 -30    4.19    0.62
   6  -4 -30    0.08    0.38
   8  -4 -30    2.03    0.54
  10  -4 -30    1.03    0.48
  12  -4 -30    3.33    0.67
  14  -4 -30    0.12    0.44
  16  -4 -30    0.44    0.46
  18  -4 -30    6.80    0.94
  20  -4 -30    9.44    1.15
  22  -4 -30    2.20    0.71
  24  -4 -30    6.70    1.06
 -19  -3 -30    1.74    0.81
 -17  -3 -30    1.06    0.71
  -5  -3 -30    0.35    0.33
  -3  -3 -30    5.91    0.65
  -1  -3 -30   -0.11    0.29
   1  -3 -30   15.64    1.15
   3  -3 -30   13.56    1.07
   5  -3 -30   17.71    1.23
   7  -3 -30    9.91    0.96
   9  -3 -30    0.80    0.44
  11  -3 -30   11.34    1.10
  13  -3 -30    0.59    0.43
  15  -3 -30    0.64    0.43
  17  -3 -30    1.97    0.62
  19  -3 -30    1.60    0.60
  21  -3 -30    0.25    0.50
  23  -3 -30    7.07    1.05
  25  -3 -30    0.33    0.57
 -22  -2 -30    0.79    0.71
 -20  -2 -30    0.99    0.74
 -18  -2 -30    1.56    0.71
 -16  -2 -30    2.25    0.71
 -10  -2 -30   10.64    0.94
  -8  -2 -30    1.02    0.39
  -6  -2 -30    2.03    0.46
  -4  -2 -30    5.75    0.67
  -2  -2 -30   -0.41    0.24
   0  -2 -30   20.01    1.32
   2  -2 -30    8.27    0.79
   4  -2 -30   15.43    1.15
   6  -2 -30    7.31    0.81
   8  -2 -30    0.10    0.38
  10  -2 -30    0.83    0.46
  12  -2 -30    4.70    0.73
  14  -2 -30    0.09    0.38
  16  -2 -30    0.61    0.48
  18  -2 -30   10.06    1.06
  20  -2 -30    8.00    1.05
  22  -2 -30    9.26    1.14
  24  -2 -30    2.78    0.79
  26  -2 -30   -0.08    0.56
  28  -2 -30    0.36    0.57
 -21  -1 -30    1.83    0.77
 -19  -1 -30    1.10    0.64
 -17  -1 -30    1.25    0.66
 -15  -1 -30    1.19    0.59
 -13  -1 -30    5.67    0.72
 -11  -1 -30    3.98    0.63
  -9  -1 -30    0.14    0.35
  -7  -1 -30   13.41    1.05
  -5  -1 -30    4.78    0.65
  -3  -1 -30    4.35    0.61
  -1  -1 -30   21.09    1.37
   1  -1 -30    1.43    0.42
   3  -1 -30   72.89    3.47
   5  -1 -30    0.81    0.39
   7  -1 -30    4.27    0.64
   9  -1 -30    1.59    0.48
  11  -1 -30    2.15    0.56
  13  -1 -30    5.79    0.77
  15  -1 -30    0.45    0.45
  17  -1 -30    0.79    0.46
  19  -1 -30   -0.16    0.39
  21  -1 -30    5.42    0.86
  23  -1 -30    0.58    0.52
  25  -1 -30    0.76    0.53
  27  -1 -30    0.73    0.54
  29  -1 -30    6.76    1.05
 -22   0 -30    1.91    0.84
 -20   0 -30    5.94    1.03
 -18   0 -30   22.79    1.80
 -16   0 -30    6.50    0.97
 -14   0 -30   11.07    1.03
 -12   0 -30    6.58    0.80
 -10   0 -30   11.09    1.02
  -8   0 -30    6.81    0.80
  -6   0 -30   10.33    0.96
  -4   0 -30    4.33    0.63
  -2   0 -30   10.99    0.94
   0   0 -30   -0.08    0.28
   2   0 -30   16.49    1.13
   4   0 -30   27.41    1.68
   6   0 -30    4.41    0.61
   8   0 -30    8.13    0.82
  10   0 -30   90.17    4.39
  12   0 -30   10.78    1.02
  14   0 -30   48.92    2.78
  16   0 -30    7.30    0.86
  18   0 -30   28.93    1.79
  20   0 -30   24.96    1.77
  22   0 -30    3.57    0.75
  24   0 -30   12.95    1.28
  26   0 -30   21.52    1.67
 -21   1 -30    0.78    0.77
 -19   1 -30    0.88    0.67
 -17   1 -30    1.66    0.68
 -13   1 -30    4.68    0.74
 -11   1 -30    3.57    0.66
  -9   1 -30   -0.77    0.29
  -7   1 -30   13.19    1.13
  -5   1 -30    5.61    0.72
  -3   1 -30    5.18    0.68
  -1   1 -30   22.46    1.43
   1   1 -30    2.46    0.48
   3   1 -30   66.38    3.45
   5   1 -30    1.38    0.43
   7   1 -30    4.55    0.63
   9   1 -30    1.48    0.46
  11   1 -30    1.07    0.44
  13   1 -30    5.55    0.72
  15   1 -30    0.49    0.41
  17   1 -30   -0.10    0.33
  19   1 -30    0.41    0.39
  21   1 -30    6.22    0.83
  23   1 -30    0.22    0.42
 -12   2 -30    0.70    0.48
 -10   2 -30   10.23    1.05
  -8   2 -30    0.44    0.41
  -6   2 -30    1.61    0.50
  -4   2 -30    6.62    0.78
  -2   2 -30   -0.08    0.33
   0   2 -30   21.20    1.41
   2   2 -30    7.26    0.79
   4   2 -30   16.65    1.18
   6   2 -30    9.46    0.86
   8   2 -30    1.06    0.40
  10   2 -30    0.32    0.35
  12   2 -30    4.41    0.64
  14   2 -30   -0.23    0.30
  16   2 -30   -0.01    0.32
  18   2 -30    6.77    0.83
  20   2 -30    8.12    0.91
 -11   3 -30    3.30    0.73
  -9   3 -30    0.16    0.39
  -7   3 -30   15.00    1.21
  -5   3 -30    0.25    0.40
  -3   3 -30    6.27    0.80
  -1   3 -30    0.33    0.36
   1   3 -30   18.85    1.30
   3   3 -30   14.71    1.14
   5   3 -30   17.11    1.23
   7   3 -30   10.34    0.94
   9   3 -30    0.91    0.41
  11   3 -30   11.07    0.95
  13   3 -30    0.85    0.38
  15   3 -30    0.30    0.34
  17   3 -30    1.31    0.46
  -8   4 -30    0.09    0.41
  -6   4 -30   15.17    1.31
  -4   4 -30    1.69    0.56
  -2   4 -30   18.29    1.36
   0   4 -30   12.33    1.15
   2   4 -30    6.43    0.81
   4   4 -30    4.58    0.69
   6   4 -30    0.07    0.36
   8   4 -30    1.30    0.45
  10   4 -30    0.65    0.38
  12   4 -30    2.70    0.55
  14   4 -30    0.43    0.37
  16   4 -30   -0.26    0.38
  18   4 -30    5.80    0.84
  20   4 -30   11.09    1.13
  22   4 -30    1.03    0.59
  24   4 -30    8.09    1.10
  26   4 -30    5.09    1.00
  -7   5 -30    2.79    0.73
  -5   5 -30   18.59    1.50
  -3   5 -30    2.69    0.67
  -1   5 -30    0.22    0.41
   1   5 -30    7.44    0.88
   3   5 -30    0.13    0.40
   5   5 -30    2.69    0.59
   7   5 -30   10.89    1.01
   9   5 -30    9.70    0.93
  11   5 -30    4.75    0.69
  13   5 -30    6.97    0.86
  15   5 -30   32.52    2.08
  17   5 -30    1.27    0.56
  19   5 -30   19.97    1.52
  21   5 -30    9.55    1.16
  23   5 -30    7.32    1.09
  -4   6 -30    1.17    0.58
  -2   6 -30    8.79    1.06
   0   6 -30    1.27    0.55
   2   6 -30    0.08    0.40
   4   6 -30    0.34    0.43
   6   6 -30    0.80    0.45
   8   6 -30    0.04    0.39
  10   6 -30    0.59    0.48
  12   6 -30    1.12    0.54
  14   6 -30    5.71    0.87
  16   6 -30    1.75    0.60
  18   6 -30    1.33    0.64
  20   6 -30    0.48    0.51
   1   7 -30    4.88    0.85
   3   7 -30    1.30    0.58
   9   7 -30    0.26    0.48
  11   7 -30    0.39    0.48
  13   7 -30    1.69    0.60
  15   7 -30    0.49    0.51
  17   7 -30    5.39    0.94
   8   8 -30    0.36    0.53
  10   8 -30    0.14    0.51
  12   8 -30   -0.27    0.51
  14   8 -30    4.26    0.90
   9   9 -30    0.50    0.61
  12  -8 -29    1.79    0.68
  14  -8 -29    0.79    0.57
  16  -8 -29    0.18    0.51
   7  -7 -29    4.96    0.77
   9  -7 -29    0.27    0.47
  11  -7 -29    0.62    0.51
  13  -7 -29    0.84    0.53
  15  -7 -29    1.49    0.59
  17  -7 -29    3.62    0.84
  19  -7 -29    0.95    0.54
 -14  -6 -29    2.59    0.82
 -12  -6 -29    9.59    1.16
 -10  -6 -29    0.49    0.62
   4  -6 -29    1.92    0.54
   6  -6 -29    0.47    0.43
   8  -6 -29    1.77    0.56
  10  -6 -29   -0.26    0.42
  12  -6 -29    0.44    0.50
  14  -6 -29    1.27    0.56
  16  -6 -29    0.62    0.52
  18  -6 -29    2.09    0.70
  20  -6 -29    2.82    0.75
 -19  -5 -29    0.00    0.84
 -17  -5 -29    4.11    1.03
 -15  -5 -29   20.32    1.73
 -11  -5 -29    2.97    0.75
  -9  -5 -29    0.69    0.55
   1  -5 -29   -0.19    0.31
   3  -5 -29   15.31    1.17
   5  -5 -29    2.27    0.54
   7  -5 -29    7.88    0.91
   9  -5 -29    7.27    0.87
  11  -5 -29    0.20    0.42
  13  -5 -29   11.30    1.17
  15  -5 -29    1.43    0.53
  17  -5 -29    1.06    0.51
  19  -5 -29    0.88    0.48
  21  -5 -29    1.22    0.58
  23  -5 -29    2.89    0.82
 -20  -4 -29    1.68    0.88
 -18  -4 -29    0.98    0.81
 -16  -4 -29   -0.14    0.68
 -14  -4 -29    2.76    0.90
 -12  -4 -29   -0.85    0.62
 -10  -4 -29   23.09    1.63
  -8  -4 -29    0.06    0.44
  -2  -4 -29    0.93    0.35
   0  -4 -29   14.87    1.04
   2  -4 -29    0.28    0.33
   4  -4 -29    2.39    0.52
   6  -4 -29    1.37    0.50
   8  -4 -29    1.24    0.50
  10  -4 -29    3.37    0.65
  12  -4 -29    3.38    0.67
  14  -4 -29    1.04    0.54
  16  -4 -29    3.05    0.70
  18  -4 -29    0.84    0.52
  20  -4 -29    5.22    0.87
  22  -4 -29    1.41    0.60
  24  -4 -29    1.03    0.59
 -21  -3 -29    8.06    1.26
 -19  -3 -29    1.68    0.82
 -17  -3 -29    6.43    1.03
 -15  -3 -29    5.77    0.98
 -13  -3 -29   -0.66    0.58
 -11  -3 -29    3.52    0.76
  -9  -3 -29   -0.11    0.56
  -7  -3 -29   18.82    1.19
  -5  -3 -29    0.48    0.33
  -3  -3 -29   35.64    2.02
  -1  -3 -29   14.97    1.08
   1  -3 -29   26.88    1.58
   3  -3 -29   79.22    3.96
   5  -3 -29    1.63    0.47
   7  -3 -29   34.40    2.00
   9  -3 -29    0.45    0.43
  11  -3 -29    7.97    0.89
  13  -3 -29   -0.30    0.35
  15  -3 -29    5.90    0.85
  17  -3 -29    4.76    0.80
  19  -3 -29    2.52    0.69
  21  -3 -29    8.85    1.11
  23  -3 -29    2.41    0.70
  25  -3 -29   10.96    1.28
  27  -3 -29   12.96    1.43
 -22  -2 -29    2.41    0.88
 -20  -2 -29    0.65    0.66
 -18  -2 -29    1.17    0.68
 -16  -2 -29    0.54    0.63
 -14  -2 -29    0.47    0.59
 -12  -2 -29    0.26    0.57
 -10  -2 -29    4.21    0.47
  -8  -2 -29    0.20    0.33
  -6  -2 -29   21.75    1.43
  -4  -2 -29   11.53    0.89
  -2  -2 -29    5.20    0.61
   0  -2 -29    9.18    0.83
   2  -2 -29   31.37    1.84
   4  -2 -29   16.86    1.19
   6  -2 -29   19.95    1.29
   8  -2 -29    4.05    0.65
  10  -2 -29    0.48    0.41
  12  -2 -29    5.72    0.81
  14  -2 -29    4.49    0.72
  16  -2 -29    2.57    0.62
  18  -2 -29    0.53    0.48
  20  -2 -29    7.41    0.98
  22  -2 -29    0.27    0.50
  24  -2 -29    0.84    0.55
  26  -2 -29    2.91    0.82
  28  -2 -29    2.01    0.69
 -23  -1 -29    4.26    1.11
 -21  -1 -29    1.00    0.69
 -19  -1 -29    4.78    0.91
 -17  -1 -29    0.58    0.60
 -15  -1 -29    0.10    0.55
 -13  -1 -29    2.53    0.43
 -11  -1 -29    0.66    0.28
  -9  -1 -29    1.44    0.46
  -7  -1 -29    4.30    0.61
  -5  -1 -29    0.48    0.34
  -3  -1 -29    1.92    0.45
  -1  -1 -29    0.78    0.34
   1  -1 -29    6.19    0.66
   3  -1 -29   24.64    1.46
   5  -1 -29   11.72    0.94
   7  -1 -29    3.19    0.56
   9  -1 -29    5.94    0.74
  11  -1 -29    2.03    0.54
  13  -1 -29    6.51    0.82
  15  -1 -29   12.96    1.15
  17  -1 -29    0.14    0.41
  19  -1 -29    0.25    0.43
  21  -1 -29    2.05    0.61
  23  -1 -29    3.85    0.79
  25  -1 -29    0.80    0.52
  27  -1 -29    1.21    0.59
  29  -1 -29    0.57    0.56
 -22   0 -29    1.39    0.76
 -20   0 -29    1.19    0.72
 -18   0 -29    1.12    0.67
 -16   0 -29    0.07    0.50
 -14   0 -29    0.93    0.32
 -12   0 -29    0.16    0.28
 -10   0 -29    0.45    0.27
  -8   0 -29    0.45    0.36
  -6   0 -29    0.44    0.36
  -4   0 -29    0.64    0.36
  -2   0 -29    0.47    0.32
   0   0 -29   -0.02    0.28
   2   0 -29    0.06    0.30
   4   0 -29    0.62    0.33
   6   0 -29    0.22    0.32
   8   0 -29    0.22    0.34
  10   0 -29    0.55    0.38
  12   0 -29    0.19    0.38
  14   0 -29   -0.05    0.35
  16   0 -29   -0.02    0.37
  18   0 -29    0.48    0.42
  20   0 -29    0.19    0.40
  22   0 -29    0.57    0.49
  24   0 -29    0.74    0.50
  26   0 -29    0.55    0.54
 -23   1 -29    2.18    0.94
 -21   1 -29   -0.05    0.64
 -19   1 -29    4.32    0.93
 -17   1 -29    0.07    0.56
 -15   1 -29    0.74    0.57
 -13   1 -29    2.69    0.45
 -11   1 -29    0.09    0.29
  -9   1 -29    0.91    0.45
  -7   1 -29    4.68    0.69
  -5   1 -29   -0.18    0.32
  -3   1 -29    2.07    0.48
  -1   1 -29    0.84    0.35
   1   1 -29    6.18    0.68
   3   1 -29   22.09    1.44
   5   1 -29   12.11    0.94
   7   1 -29    2.69    0.51
   9   1 -29    7.54    0.76
  11   1 -29    2.39    0.52
  13   1 -29    6.95    0.80
  15   1 -29   11.09    1.03
  17   1 -29    1.03    0.44
  19   1 -29    0.99    0.46
  21   1 -29    0.87    0.46
  23   1 -29    4.28    0.75
 -22   2 -29    1.71    0.84
 -20   2 -29    0.09    0.64
 -18   2 -29    0.24    0.59
 -16   2 -29    0.57    0.59
 -14   2 -29    1.02    0.58
 -12   2 -29    0.61    0.33
 -10   2 -29    4.68    0.73
  -8   2 -29    0.29    0.39
  -6   2 -29   26.39    1.63
  -4   2 -29   10.09    0.97
  -2   2 -29    4.70    0.68
   0   2 -29   10.01    0.90
   2   2 -29   35.60    1.93
   4   2 -29   16.97    1.18
   6   2 -29   17.23    1.22
   8   2 -29    4.84    0.63
  10   2 -29    0.52    0.36
  12   2 -29    7.81    0.78
  14   2 -29    3.24    0.57
  16   2 -29    2.90    0.56
  18   2 -29    0.67    0.42
  20   2 -29    6.55    0.83
 -21   3 -29   10.89    1.36
 -19   3 -29    0.49    0.65
 -17   3 -29    4.37    0.91
 -15   3 -29    4.98    0.88
 -13   3 -29    0.57    0.52
 -11   3 -29    3.12    0.52
  -9   3 -29    1.01    0.49
  -7   3 -29   17.88    1.36
  -5   3 -29    0.24    0.38
  -3   3 -29   36.03    2.19
  -1   3 -29   16.86    1.23
   1   3 -29   25.51    1.66
   3   3 -29   82.49    4.03
   5   3 -29    1.86    0.47
   7   3 -29   34.19    1.95
   9   3 -29    0.87    0.40
  11   3 -29    6.34    0.71
  13   3 -29    0.90    0.38
  15   3 -29    6.36    0.74
  17   3 -29    3.84    0.61
  19   3 -29    2.24    0.59
  21   3 -29    9.78    1.03
  23   3 -29    2.01    0.64
  25   3 -29   10.30    1.21
 -20   4 -29    0.49    0.71
 -18   4 -29    1.53    0.70
 -16   4 -29    2.00    0.71
 -14   4 -29    5.45    0.89
 -12   4 -29    1.08    0.57
  -8   4 -29   -0.09    0.36
  -6   4 -29   10.90    1.11
  -4   4 -29   28.07    1.82
  -2   4 -29   -0.37    0.35
   0   4 -29   14.56    1.18
   2   4 -29    0.46    0.39
   4   4 -29    2.53    0.57
   6   4 -29    1.57    0.49
   8   4 -29    0.83    0.44
  10   4 -29    3.89    0.60
  12   4 -29    2.25    0.48
  14   4 -29    0.86    0.29
  16   4 -29    2.54    0.62
  18   4 -29    1.22    0.49
  20   4 -29    2.15    0.67
  22   4 -29    0.03    0.48
  24   4 -29    0.30    0.56
  26   4 -29    0.43    0.60
 -17   5 -29    4.63    1.04
 -15   5 -29   20.36    1.69
  -7   5 -29    0.89    0.55
  -5   5 -29    1.05    0.54
  -3   5 -29    4.06    0.75
  -1   5 -29    1.28    0.51
   1   5 -29    0.25    0.42
   3   5 -29   17.93    1.32
   5   5 -29    3.08    0.60
   7   5 -29    9.71    0.93
   9   5 -29    6.30    0.76
  11   5 -29    0.18    0.26
  13   5 -29   12.96    1.15
  15   5 -29   -0.08    0.37
  17   5 -29    0.76    0.51
  19   5 -29    0.64    0.52
  21   5 -29    0.38    0.50
  23   5 -29    1.71    0.72
  -4   6 -29    0.64    0.50
  -2   6 -29    2.90    0.68
   0   6 -29    0.30    0.45
   2   6 -29   12.02    1.17
   4   6 -29    3.69    0.67
   6   6 -29   -0.11    0.36
   8   6 -29    0.16    0.43
  10   6 -29    0.16    0.37
  12   6 -29   -0.26    0.40
  14   6 -29    0.47    0.45
  16   6 -29    0.94    0.51
  18   6 -29    1.06    0.55
  20   6 -29    4.09    0.84
   1   7 -29   17.70    1.44
   3   7 -29    6.45    0.88
   7   7 -29    3.36    0.71
   9   7 -29    0.02    0.44
  11   7 -29   -0.39    0.40
  13   7 -29    0.12    0.45
  15   7 -29    0.83    0.56
  17   7 -29    3.85    0.83
   8   8 -29    8.30    1.02
  10   8 -29    6.43    0.96
  12   8 -29    2.44    0.73
  14   8 -29    0.22    0.55
   9   9 -29   19.29    1.66
  11   9 -29    4.32    0.95
 -12  -8 -28    0.74    0.65
 -10  -8 -28    4.08    0.92
  12  -8 -28    2.35    0.73
  14  -8 -28   -0.07    0.50
  16  -8 -28    2.11    0.70
 -15  -7 -28    0.94    0.74
 -13  -7 -28    0.51    0.68
 -11  -7 -28    1.13    0.69
  -9  -7 -28    5.85    0.95
  -7  -7 -28    7.29    1.01
  -5  -7 -28    1.09    0.61
   7  -7 -28    4.32    0.73
   9  -7 -28   11.29    1.16
  11  -7 -28   18.96    1.50
  13  -7 -28    1.84    0.62
  15  -7 -28   39.28    2.60
  17  -7 -28    3.28    0.80
  19  -7 -28   16.18    1.59
 -18  -6 -28    2.06    1.03
 -14  -6 -28    1.03    0.69
 -12  -6 -28    1.38    0.67
 -10  -6 -28    0.26    0.55
  -8  -6 -28    1.98    0.67
  -6  -6 -28   -0.33    0.50
  -4  -6 -28   -0.21    0.46
   4  -6 -28    1.94    0.53
   6  -6 -28    7.90    0.87
   8  -6 -28    0.30    0.43
  10  -6 -28    0.54    0.51
  12  -6 -28    1.29    0.57
  14  -6 -28   16.69    1.41
  16  -6 -28    3.00    0.74
  18  -6 -28   11.92    1.32
  20  -6 -28   17.15    1.66
 -19  -5 -28   -0.07    0.82
 -17  -5 -28   -0.21    0.79
 -15  -5 -28    0.45    0.82
 -13  -5 -28   12.12    1.26
 -11  -5 -28    1.25    0.63
  -9  -5 -28    2.04    0.63
  -7  -5 -28    0.66    0.54
  -5  -5 -28   30.60    1.89
  -3  -5 -28    1.24    0.52
   1  -5 -28   38.83    2.16
   3  -5 -28    0.36    0.35
   5  -5 -28   22.90    1.49
   7  -5 -28   13.17    1.08
   9  -5 -28    0.26    0.42
  11  -5 -28    1.23    0.53
  13  -5 -28    9.47    1.05
  15  -5 -28   -0.10    0.43
  17  -5 -28    0.82    0.52
  19  -5 -28    1.16    0.56
  21  -5 -28    2.69    0.73
  23  -5 -28    2.97    0.81
 -20  -4 -28    1.61    0.89
 -18  -4 -28   12.95    1.42
 -16  -4 -28   -0.82    0.61
 -14  -4 -28    2.43    0.82
 -10  -4 -28    5.00    0.79
  -8  -4 -28    0.86    0.53
  -6  -4 -28    0.31    0.45
  -4  -4 -28    0.35    0.46
  -2  -4 -28    0.18    0.30
   0  -4 -28    0.17    0.34
   2  -4 -28    0.01    0.33
   4  -4 -28    1.11    0.42
   6  -4 -28    1.62    0.51
   8  -4 -28    5.95    0.78
  10  -4 -28    0.67    0.45
  12  -4 -28    5.45    0.81
  14  -4 -28    0.21    0.43
  16  -4 -28    4.02    0.76
  18  -4 -28   -0.19    0.41
  20  -4 -28    2.12    0.65
  22  -4 -28    2.91    0.77
  24  -4 -28    0.91    0.60
 -23  -3 -28    0.13    0.75
 -21  -3 -28    0.25    0.73
 -19  -3 -28    0.13    0.69
 -17  -3 -28    7.93    1.11
 -15  -3 -28   11.88    1.25
 -13  -3 -28    5.57    0.92
 -11  -3 -28    9.13    1.06
  -9  -3 -28   11.45    1.09
  -7  -3 -28    0.28    0.26
  -5  -3 -28    1.21    0.32
  -3  -3 -28    6.37    0.65
  -1  -3 -28    0.20    0.29
   1  -3 -28    5.29    0.62
   3  -3 -28    7.93    0.77
   5  -3 -28    3.49    0.60
   7  -3 -28    0.81    0.42
   9  -3 -28   30.96    1.94
  11  -3 -28    7.77    0.89
  13  -3 -28    3.82    0.71
  15  -3 -28   12.40    1.18
  17  -3 -28    0.60    0.45
  19  -3 -28    1.34    0.57
  21  -3 -28    3.13    0.73
  23  -3 -28    2.45    0.72
  25  -3 -28    0.60    0.55
  27  -3 -28    3.59    0.89
 -22  -2 -28    1.15    0.77
 -20  -2 -28   10.24    1.27
 -18  -2 -28    1.25    0.67
 -16  -2 -28    4.66    0.92
 -14  -2 -28    8.70    1.06
 -12  -2 -28    0.40    0.58
 -10  -2 -28    7.99    0.59
  -8  -2 -28    2.49    0.38
  -6  -2 -28    2.82    0.39
  -4  -2 -28    0.12    0.29
  -2  -2 -28    0.38    0.31
   0  -2 -28    0.03    0.28
   2  -2 -28   30.22    1.70
   4  -2 -28    2.21    0.49
   6  -2 -28   64.83    3.26
   8  -2 -28    3.95    0.62
  10  -2 -28   50.58    2.73
  12  -2 -28    1.00    0.49
  14  -2 -28   10.68    1.07
  16  -2 -28    4.19    0.72
  18  -2 -28    8.00    1.01
  20  -2 -28    8.10    1.04
  22  -2 -28    3.15    0.76
  24  -2 -28   14.45    1.43
  26  -2 -28    3.01    0.82
  28  -2 -28    0.03    0.53
 -23  -1 -28    2.05    0.83
 -21  -1 -28    2.44    0.84
 -19  -1 -28    0.00    0.55
 -17  -1 -28    7.25    1.01
 -15  -1 -28    0.36    0.54
 -13  -1 -28   11.37    0.74
 -11  -1 -28    9.09    0.64
  -9  -1 -28   12.45    0.71
  -7  -1 -28    0.84    0.30
  -5  -1 -28    9.92    0.88
  -3  -1 -28    3.04    0.49
  -1  -1 -28    3.47    0.52
   1  -1 -28    1.18    0.39
   3  -1 -28   41.49    2.14
   5  -1 -28    0.85    0.39
   7  -1 -28    0.52    0.36
   9  -1 -28    9.50    0.90
  11  -1 -28    3.45    0.63
  13  -1 -28   19.51    1.39
  15  -1 -28    3.38    0.68
  17  -1 -28   14.41    1.20
  19  -1 -28    3.08    0.69
  21  -1 -28   14.03    1.30
  23  -1 -28    3.35    0.76
  25  -1 -28    5.07    0.88
  27  -1 -28    1.58    0.65
  29  -1 -28    1.12    0.63
 -24   0 -28    3.21    0.97
 -22   0 -28    0.23    0.64
 -20   0 -28    0.42    0.63
 -18   0 -28    2.10    0.74
 -16   0 -28    1.42    0.61
 -14   0 -28   13.10    0.81
 -12   0 -28    4.30    0.49
 -10   0 -28   75.74    2.81
  -8   0 -28   69.57    2.54
  -6   0 -28    2.91    0.54
  -4   0 -28   53.95    2.89
  -2   0 -28    4.16    0.57
   0   0 -28    2.87    0.49
   2   0 -28    0.37    0.32
   4   0 -28   19.36    1.24
   6   0 -28    6.58    0.70
   8   0 -28    1.53    0.44
  10   0 -28    1.81    0.49
  12   0 -28   11.37    1.02
  14   0 -28   12.60    1.10
  16   0 -28    3.80    0.68
  18   0 -28   15.56    1.29
  20   0 -28    5.78    0.81
  22   0 -28   16.84    1.35
  24   0 -28    0.03    0.47
  26   0 -28    2.22    0.66
 -23   1 -28    3.26    0.97
 -21   1 -28    1.72    0.80
 -19   1 -28   -0.21    0.56
 -17   1 -28    7.73    1.04
 -15   1 -28    0.08    0.52
 -13   1 -28   11.79    0.78
 -11   1 -28    9.28    0.67
  -9   1 -28   11.99    0.75
  -7   1 -28    1.40    0.33
  -5   1 -28    9.75    0.93
  -3   1 -28    3.24    0.54
  -1   1 -28    3.75    0.56
   1   1 -28    1.44    0.41
   3   1 -28   39.21    2.13
   5   1 -28    1.43    0.42
   7   1 -28    0.51    0.35
   9   1 -28   10.26    0.89
  11   1 -28    3.34    0.58
  13   1 -28   18.83    1.33
  15   1 -28    4.63    0.67
  17   1 -28   14.23    1.12
  19   1 -28    3.99    0.68
  21   1 -28   13.58    1.21
  23   1 -28    4.40    0.76
 -22   2 -28    1.52    0.82
 -20   2 -28    7.64    1.19
 -18   2 -28    1.56    0.73
 -16   2 -28    6.85    0.98
 -14   2 -28    9.52    1.06
 -12   2 -28    1.08    0.36
 -10   2 -28    8.51    0.65
  -8   2 -28    1.95    0.39
  -6   2 -28    2.13    0.53
  -4   2 -28   -0.20    0.32
  -2   2 -28    0.50    0.36
   0   2 -28    0.12    0.31
   2   2 -28   29.72    1.74
   4   2 -28    2.05    0.46
   6   2 -28   60.33    3.21
   8   2 -28    4.46    0.61
  10   2 -28   49.40    2.64
  12   2 -28    0.23    0.34
  14   2 -28   11.13    0.94
  16   2 -28    4.43    0.64
  18   2 -28    8.86    0.91
  20   2 -28   10.60    0.98
 -23   3 -28    0.00    0.74
 -21   3 -28    0.85    0.73
 -19   3 -28    0.52    0.64
 -17   3 -28    8.58    1.13
 -15   3 -28   10.91    1.19
 -13   3 -28    5.93    0.85
 -11   3 -28    8.55    0.69
  -9   3 -28   12.17    0.79
  -7   3 -28    0.10    0.28
  -5   3 -28    1.90    0.52
  -3   3 -28    6.97    0.81
  -1   3 -28    0.31    0.37
   1   3 -28    5.24    0.68
   3   3 -28    7.38    0.79
   5   3 -28    3.98    0.60
   7   3 -28    0.21    0.34
   9   3 -28   31.74    1.85
  11   3 -28    8.49    0.80
  13   3 -28    4.91    0.63
  15   3 -28   12.51    0.72
  17   3 -28    0.16    0.23
  19   3 -28    0.84    0.47
  21   3 -28    4.08    0.74
  23   3 -28    4.22    0.81
  25   3 -28    0.21    0.48
  27   3 -28    3.38    0.85
 -20   4 -28    1.35    0.77
 -18   4 -28   11.09    1.33
 -16   4 -28    0.89    0.58
 -14   4 -28    3.78    0.80
 -12   4 -28    0.29    0.50
 -10   4 -28    5.82    0.86
  -8   4 -28    1.13    0.36
  -6   4 -28    0.20    0.30
  -4   4 -28    0.24    0.38
  -2   4 -28    0.55    0.43
   0   4 -28    0.02    0.38
   2   4 -28    0.07    0.37
   4   4 -28    0.34    0.40
   6   4 -28    1.78    0.50
   8   4 -28    8.57    0.81
  10   4 -28    0.38    0.35
  12   4 -28    5.26    0.48
  14   4 -28    0.18    0.25
  16   4 -28    3.19    0.63
  18   4 -28    0.83    0.51
  20   4 -28    1.89    0.60
  22   4 -28    4.80    0.82
  24   4 -28    0.22    0.53
  26   4 -28    3.36    0.85
 -19   5 -28    0.03    0.69
 -17   5 -28    1.90    0.77
 -15   5 -28    1.13    0.69
 -13   5 -28   13.69    1.37
 -11   5 -28    0.80    0.49
  -9   5 -28    0.95    0.55
  -7   5 -28    1.83    0.43
  -5   5 -28   29.48    2.00
  -3   5 -28    2.19    0.62
  -1   5 -28   31.02    1.94
   1   5 -28   42.34    2.36
   3   5 -28    0.52    0.42
   5   5 -28   20.49    1.47
   7   5 -28   12.29    1.07
   9   5 -28   -0.29    0.24
  11   5 -28    2.27    0.38
  13   5 -28   11.01    1.04
  15   5 -28   -0.16    0.35
  17   5 -28    0.29    0.42
  19   5 -28    0.56    0.45
  21   5 -28    2.17    0.67
  23   5 -28    1.78    0.68
 -18   6 -28    2.88    0.91
 -16   6 -28   10.17    1.34
 -14   6 -28    0.90    0.69
 -12   6 -28    0.18    0.54
 -10   6 -28    0.61    0.57
  -8   6 -28    2.00    0.67
  -4   6 -28   -0.74    0.37
  -2   6 -28   -0.24    0.41
   0   6 -28    0.03    0.40
   2   6 -28   24.16    1.64
   4   6 -28    2.51    0.59
   6   6 -28    7.59    0.86
   8   6 -28   -0.21    0.33
  10   6 -28    0.56    0.41
  12   6 -28    0.62    0.46
  14   6 -28   16.30    1.34
  16   6 -28    4.41    0.84
  18   6 -28   14.78    1.34
  20   6 -28   22.57    1.69
   1   7 -28    2.20    0.65
   3   7 -28   11.47    1.13
   7   7 -28    3.11    0.68
   9   7 -28   10.65    1.10
  11   7 -28   17.22    1.41
  13   7 -28    2.17    0.65
  15   7 -28   44.61    2.63
  17   7 -28    5.71    0.92
  19   7 -28   18.81    1.60
   6   8 -28   11.36    1.17
   8   8 -28    0.31    0.48
  10   8 -28   21.63    1.65
  12   8 -28    1.78    0.67
  14   8 -28    0.29    0.52
   9   9 -28   19.67    1.68
  11   9 -28    3.08    0.81
  -7  -9 -27    6.18    1.08
 -12  -8 -27   -0.46    0.62
 -10  -8 -27   12.94    1.37
  -8  -8 -27    0.92    0.71
  -6  -8 -27    6.49    1.02
  -4  -8 -27    0.22    0.58
  -2  -8 -27    0.24    0.59
  10  -8 -27   10.56    1.14
  12  -8 -27    4.73    0.86
  14  -8 -27    3.14    0.80
  16  -8 -27    0.90    0.57
 -15  -7 -27    1.28    0.76
 -13  -7 -27    6.02    1.00
 -11  -7 -27    3.91    0.86
  -9  -7 -27    6.84    1.03
  -7  -7 -27   24.70    1.79
  -5  -7 -27    0.60    0.58
  -3  -7 -27   12.87    1.24
  -1  -7 -27   -0.27    0.50
   1  -7 -27    1.67    0.64
   7  -7 -27    4.05    0.75
   9  -7 -27    1.55    0.58
  11  -7 -27    1.13    0.56
  13  -7 -27    2.81    0.72
  17  -7 -27    1.36    0.61
  19  -7 -27    6.64    1.03
 -18  -6 -27   -0.88    0.81
 -14  -6 -27    4.15    0.92
 -12  -6 -27    0.43    0.61
 -10  -6 -27    0.78    0.59
  -8  -6 -27    2.19    0.66
  -6  -6 -27    3.29    0.69
  -4  -6 -27    8.01    0.93
  -2  -6 -27    4.76    0.76
   0  -6 -27    0.86    0.50
   2  -6 -27   40.16    2.39
   4  -6 -27    6.23    0.79
   6  -6 -27    8.83    0.91
   8  -6 -27    4.04    0.72
  10  -6 -27    0.65    0.50
  12  -6 -27    6.05    0.87
  14  -6 -27    3.40    0.70
  16  -6 -27    8.13    1.05
  18  -6 -27   13.10    1.34
  20  -6 -27    1.18    0.57
  22  -6 -27    0.39    0.57
 -19  -5 -27   -0.88    0.79
 -17  -5 -27   -0.80    0.70
 -13  -5 -27    9.89    1.11
 -11  -5 -27    0.90    0.61
  -9  -5 -27    5.49    0.81
  -7  -5 -27    5.49    0.77
  -5  -5 -27    0.64    0.50
  -3  -5 -27    0.43    0.44
  -1  -5 -27    6.32    0.77
   1  -5 -27    5.12    0.48
   3  -5 -27   50.04    2.72
   5  -5 -27    2.38    0.55
   7  -5 -27    3.00    0.60
   9  -5 -27    9.79    1.03
  11  -5 -27    3.02    0.67
  13  -5 -27    0.25    0.43
  15  -5 -27    4.11    0.79
  17  -5 -27   29.47    2.07
  19  -5 -27    0.32    0.49
  21  -5 -27   10.37    1.23
  23  -5 -27   11.02    1.33
 -22  -4 -27    3.27    1.06
 -20  -4 -27    0.39    0.78
 -18  -4 -27    1.53    0.77
 -16  -4 -27   -0.63    0.61
 -14  -4 -27    0.91    0.73
 -10  -4 -27    4.31    0.73
  -8  -4 -27   15.21    1.22
  -6  -4 -27    0.95    0.52
  -4  -4 -27    5.07    0.45
  -2  -4 -27   27.05    1.17
   0  -4 -27    0.09    0.26
   2  -4 -27   34.52    1.99
   4  -4 -27   12.49    1.04
   6  -4 -27    1.29    0.47
   8  -4 -27   21.87    1.47
  10  -4 -27    8.78    0.95
  12  -4 -27   41.68    2.49
  14  -4 -27   43.39    2.62
  16  -4 -27    1.28    0.54
  18  -4 -27    1.44    0.58
  20  -4 -27    0.37    0.46
  22  -4 -27    4.96    0.91
  24  -4 -27    0.64    0.57
  26  -4 -27    1.01    0.66
 -23  -3 -27   16.65    1.74
 -21  -3 -27    3.37    1.00
 -19  -3 -27    3.25    0.92
 -17  -3 -27    2.00    0.80
 -15  -3 -27    1.68    0.71
 -13  -3 -27    1.93    0.70
 -11  -3 -27    1.67    0.65
  -7  -3 -27    5.67    0.48
  -5  -3 -27   13.15    0.71
  -3  -3 -27   17.87    0.83
  -1  -3 -27   15.39    0.76
   1  -3 -27    8.09    0.77
   3  -3 -27   34.45    1.96
   5  -3 -27    5.74    0.71
   7  -3 -27   10.10    0.95
   9  -3 -27    3.79    0.64
  11  -3 -27    0.12    0.40
  13  -3 -27    0.06    0.42
  15  -3 -27    0.59    0.42
  17  -3 -27    0.76    0.48
  19  -3 -27    0.30    0.47
  21  -3 -27    1.65    0.60
  23  -3 -27   26.11    1.93
  25  -3 -27    2.55    0.78
  27  -3 -27    6.93    1.07
 -24  -2 -27    8.33    1.32
 -22  -2 -27    3.61    0.99
 -20  -2 -27    1.02    0.72
 -18  -2 -27    8.38    1.11
 -16  -2 -27    0.05    0.56
 -14  -2 -27    0.54    0.60
 -12  -2 -27    5.10    0.81
 -10  -2 -27    1.30    0.34
  -8  -2 -27   34.92    1.42
  -6  -2 -27    3.45    0.41
  -4  -2 -27    1.80    0.41
  -2  -2 -27   12.01    0.92
   0  -2 -27    7.37    0.72
   2  -2 -27   10.07    0.83
   4  -2 -27    9.41    0.85
   6  -2 -27    5.06    0.64
   8  -2 -27    3.96    0.64
  10  -2 -27    3.40    0.62
  12  -2 -27   30.93    1.88
  14  -2 -27   35.94    2.20
  16  -2 -27    0.22    0.43
  18  -2 -27    6.84    0.91
  20  -2 -27   10.80    1.17
  22  -2 -27   10.45    1.18
  24  -2 -27    6.13    0.96
  26  -2 -27    1.28    0.64
  28  -2 -27    0.84    0.62
 -23  -1 -27    0.94    0.72
 -21  -1 -27    0.83    0.64
 -19  -1 -27    1.76    0.73
 -17  -1 -27    2.45    0.74
 -15  -1 -27    1.88    0.64
 -13  -1 -27    3.61    0.45
 -11  -1 -27   11.57    0.72
  -9  -1 -27    8.35    0.59
  -7  -1 -27   30.38    1.26
  -5  -1 -27    7.50    0.51
  -3  -1 -27   42.57    2.28
  -1  -1 -27    5.95    0.62
   1  -1 -27   23.34    1.45
   3  -1 -27    4.40    0.58
   5  -1 -27   16.12    1.13
   7  -1 -27    2.26    0.48
   9  -1 -27    3.01    0.56
  11  -1 -27    0.00    0.35
  13  -1 -27   -0.02    0.38
  15  -1 -27    1.47    0.50
  17  -1 -27    7.89    0.93
  19  -1 -27    4.07    0.75
  21  -1 -27   28.27    1.96
  23  -1 -27   12.12    1.26
  25  -1 -27    2.37    0.70
  27  -1 -27    9.13    1.16
 -24   0 -27    0.50    0.75
 -22   0 -27    0.99    0.71
 -20   0 -27    0.45    0.62
 -18   0 -27    1.45    0.63
 -16   0 -27   -0.74    0.50
 -14   0 -27   -0.13    0.27
 -12   0 -27   -0.02    0.27
 -10   0 -27    0.43    0.27
  -8   0 -27    0.59    0.28
  -6   0 -27    0.08    0.26
  -4   0 -27    1.88    0.47
  -2   0 -27    0.30    0.30
   0   0 -27    0.35    0.29
   2   0 -27    0.22    0.28
   4   0 -27    0.21    0.29
   6   0 -27   -0.17    0.28
   8   0 -27    0.40    0.36
  10   0 -27   -0.12    0.31
  12   0 -27    0.14    0.37
  14   0 -27   -0.19    0.36
  16   0 -27   -0.36    0.36
  18   0 -27    0.15    0.37
  20   0 -27    0.14    0.42
  22   0 -27    0.72    0.48
  24   0 -27    0.18    0.44
  26   0 -27    0.51    0.49
 -23   1 -27    0.59    0.72
 -21   1 -27    2.18    0.80
 -19   1 -27    2.00    0.76
 -17   1 -27    5.21    0.89
 -15   1 -27    2.08    0.65
 -13   1 -27    3.84    0.48
 -11   1 -27   12.81    0.77
  -9   1 -27    7.57    0.60
  -7   1 -27   31.11    1.31
  -5   1 -27    7.48    0.55
  -3   1 -27   41.76    2.33
  -1   1 -27    5.13    0.63
   1   1 -27   24.15    1.47
   3   1 -27    7.30    0.68
   5   1 -27   16.38    1.12
   7   1 -27    2.74    0.50
   9   1 -27    2.91    0.52
  11   1 -27   -0.51    0.30
  13   1 -27    0.48    0.38
  15   1 -27    0.92    0.44
  17   1 -27    8.27    0.89
  19   1 -27    5.41    0.75
  21   1 -27   30.58    1.91
  23   1 -27   14.12    1.23
 -24   2 -27    8.41    1.37
 -22   2 -27    3.23    0.95
 -20   2 -27    0.79    0.64
 -18   2 -27    8.84    1.16
 -16   2 -27    0.85    0.57
 -14   2 -27    1.44    0.59
 -12   2 -27    5.70    0.55
 -10   2 -27    1.53    0.38
  -8   2 -27   35.99    1.50
  -6   2 -27    4.54    0.46
  -4   2 -27    1.46    0.32
  -2   2 -27   13.28    1.03
   0   2 -27    9.34    0.85
   2   2 -27   11.16    0.90
   4   2 -27   10.28    0.87
   6   2 -27    4.60    0.60
   8   2 -27    5.07    0.64
  10   2 -27    2.43    0.50
  12   2 -27   29.56    1.75
  14   2 -27   35.27    2.05
  16   2 -27    0.65    0.39
  18   2 -27    6.01    0.75
  20   2 -27   11.61    1.03
 -23   3 -27   13.19    1.65
 -21   3 -27    3.15    0.96
 -19   3 -27    2.93    0.86
 -17   3 -27    1.70    0.72
 -15   3 -27    0.95    0.58
 -13   3 -27    0.76    0.53
 -11   3 -27    2.00    0.41
  -9   3 -27    3.28    0.46
  -7   3 -27    5.65    0.54
  -5   3 -27   13.35    0.78
  -3   3 -27   17.03    0.88
  -1   3 -27   16.35    1.18
   1   3 -27    9.82    0.90
   3   3 -27   35.66    2.02
   5   3 -27    6.69    0.72
   7   3 -27    9.14    0.86
   9   3 -27    2.45    0.51
  11   3 -27    0.37    0.34
  13   3 -27    0.09    0.25
  15   3 -27   -0.06    0.22
  17   3 -27    0.27    0.25
  19   3 -27    0.30    0.39
  21   3 -27    1.86    0.57
  23   3 -27   27.62    1.87
  25   3 -27    3.75    0.84
  27   3 -27    5.74    0.99
 -22   4 -27    3.45    0.99
 -20   4 -27    1.32    0.78
 -18   4 -27   -0.04    0.61
 -16   4 -27    0.03    0.53
 -14   4 -27    2.37    0.70
 -12   4 -27    4.55    0.81
 -10   4 -27    2.83    0.69
  -8   4 -27   14.68    0.88
  -6   4 -27    2.34    0.42
  -4   4 -27    3.74    0.46
  -2   4 -27   29.91    1.28
   0   4 -27    0.49    0.43
   2   4 -27   38.22    2.12
   4   4 -27   15.58    1.14
   6   4 -27    0.57    0.40
   8   4 -27   21.14    1.38
  10   4 -27    8.61    0.59
  12   4 -27   44.33    1.68
  14   4 -27   45.98    1.76
  16   4 -27    1.01    0.45
  18   4 -27    0.49    0.42
  20   4 -27    0.01    0.38
  22   4 -27    6.53    0.92
  24   4 -27    0.48    0.52
  26   4 -27    3.46    0.82
 -19   5 -27   -0.36    0.61
 -17   5 -27    0.91    0.65
 -15   5 -27    1.22    0.67
 -13   5 -27   10.43    1.18
 -11   5 -27    1.04    0.56
  -9   5 -27    4.20    0.77
  -7   5 -27    3.91    0.76
  -5   5 -27    0.46    0.32
  -3   5 -27    0.02    0.28
  -1   5 -27    7.59    0.88
   1   5 -27    7.24    0.83
   3   5 -27   54.37    2.85
   5   5 -27    2.58    0.56
   7   5 -27    3.55    0.60
   9   5 -27   10.64    0.68
  11   5 -27    4.45    0.69
  13   5 -27    0.90    0.43
  15   5 -27    5.54    0.78
  17   5 -27   32.34    2.01
  19   5 -27    0.65    0.50
  21   5 -27   12.29    1.23
  23   5 -27   15.97    1.43
 -18   6 -27    0.48    0.71
 -16   6 -27   -0.13    0.59
 -14   6 -27    5.34    0.99
 -12   6 -27    1.49    0.68
 -10   6 -27   -0.87    0.48
  -8   6 -27    2.33    0.69
  -6   6 -27    2.88    0.70
  -4   6 -27    9.45    1.02
  -2   6 -27    5.65    0.57
   0   6 -27    0.27    0.43
   2   6 -27   42.40    2.44
   4   6 -27    6.80    0.83
   6   6 -27    8.62    0.63
   8   6 -27    4.02    0.69
  10   6 -27   -0.16    0.34
  12   6 -27    6.22    0.83
  14   6 -27    1.22    0.55
  16   6 -27    7.99    0.98
  18   6 -27   13.73    1.29
  20   6 -27   -0.17    0.50
  22   6 -27    0.15    0.50
 -15   7 -27    0.18    0.69
 -13   7 -27    4.30    0.99
 -11   7 -27    4.01    0.95
  -9   7 -27    9.14    1.16
  -7   7 -27   27.22    2.00
  -5   7 -27    0.57    0.55
   1   7 -27    2.12    0.63
   3   7 -27    4.55    0.75
   5   7 -27    2.66    0.61
   7   7 -27    3.69    0.69
   9   7 -27    1.08    0.50
  11   7 -27   -0.02    0.40
  13   7 -27    3.02    0.70
  15   7 -27   -0.13    0.41
  17   7 -27    1.07    0.56
  19   7 -27   10.18    1.17
 -12   8 -27    0.23    0.65
 -10   8 -27   10.48    1.38
   6   8 -27    0.63    0.52
   8   8 -27    1.14    0.51
  10   8 -27    7.64    1.03
  12   8 -27    2.57    0.74
  14   8 -27    4.17    0.86
  16   8 -27   -0.05    0.50
   9   9 -27    5.80    0.96
  11   9 -27    1.38    0.65
  -7  -9 -26    0.45    0.72
  -5  -9 -26    1.54    0.78
  -3  -9 -26    4.34    0.96
  -1  -9 -26    1.18    0.77
   1  -9 -26   13.44    1.46
 -12  -8 -26    1.34    0.72
 -10  -8 -26    3.40    0.90
  -8  -8 -26   -0.29    0.58
  -6  -8 -26    0.28    0.62
  -4  -8 -26    1.13    0.65
  -2  -8 -26    5.09    0.92
   0  -8 -26    4.40    0.84
   2  -8 -26    2.89    0.80
   4  -8 -26   14.00    1.36
  10  -8 -26    1.45    0.60
  12  -8 -26    0.80    0.57
  14  -8 -26    1.98    0.70
  16  -8 -26    1.57    0.69
 -15  -7 -26    0.54    0.70
 -13  -7 -26   27.15    2.09
 -11  -7 -26    2.95    0.78
  -9  -7 -26    3.26    0.80
  -7  -7 -26    4.45    0.82
  -5  -7 -26   18.15    1.54
  -3  -7 -26    5.85    0.87
  -1  -7 -26    0.95    0.57
   1  -7 -26   12.88    1.19
   3  -7 -26    0.26    0.54
   5  -7 -26    4.94    0.81
   7  -7 -26    0.56    0.51
   9  -7 -26   -0.14    0.43
  11  -7 -26   10.21    1.11
  13  -7 -26    1.74    0.62
  15  -7 -26    2.38    0.71
  17  -7 -26    0.91    0.60
  19  -7 -26    2.20    0.69
 -18  -6 -26    0.75    0.94
 -16  -6 -26    1.29    0.76
 -14  -6 -26   -0.10    0.58
 -12  -6 -26    3.44    0.79
 -10  -6 -26    5.44    0.85
  -8  -6 -26    1.53    0.63
  -6  -6 -26    0.56    0.50
  -4  -6 -26    0.55    0.50
  -2  -6 -26    0.64    0.50
   0  -6 -26    2.81    0.66
   2  -6 -26   12.17    1.08
   4  -6 -26   12.29    0.75
   6  -6 -26    1.08    0.44
   8  -6 -26   15.31    1.24
  10  -6 -26    8.55    0.96
  12  -6 -26   15.54    1.36
  14  -6 -26    2.92    0.73
  16  -6 -26    1.86    0.62
  18  -6 -26    7.81    1.07
  20  -6 -26   19.42    1.63
  22  -6 -26    1.05    0.64
 -21  -5 -26   -0.24    0.79
 -19  -5 -26    0.07    0.78
 -17  -5 -26    2.00    0.89
 -13  -5 -26    3.81    0.79
 -11  -5 -26   -0.16    0.51
  -9  -5 -26    8.76    0.97
  -7  -5 -26   20.97    1.50
  -5  -5 -26   43.67    2.57
  -3  -5 -26   16.07    1.38
  -1  -5 -26    1.25    0.31
   1  -5 -26   43.09    1.65
   3  -5 -26    5.65    0.50
   5  -5 -26   25.37    1.58
   7  -5 -26    6.90    0.83
   9  -5 -26   15.09    1.22
  11  -5 -26   17.48    1.38
  13  -5 -26   10.92    1.14
  15  -5 -26    1.86    0.61
  19  -5 -26    1.70    0.64
  21  -5 -26    6.13    0.97
  23  -5 -26    2.62    0.77
 -22  -4 -26    0.59    0.82
 -20  -4 -26    2.01    0.89
 -18  -4 -26    0.70    0.75
 -16  -4 -26   -0.38    0.68
 -14  -4 -26    0.08    0.66
 -10  -4 -26    0.36    0.51
  -8  -4 -26    7.24    0.84
  -6  -4 -26    0.92    0.50
  -4  -4 -26    0.20    0.30
  -2  -4 -26    0.72    0.26
   0  -4 -26    0.84    0.30
   2  -4 -26    4.75    0.44
   4  -4 -26   25.04    1.07
   6  -4 -26   49.52    2.62
   8  -4 -26   -0.35    0.36
  10  -4 -26   67.49    3.44
  16  -4 -26    3.00    0.69
  18  -4 -26   -0.52    0.39
  20  -4 -26    5.88    0.92
  22  -4 -26    1.46    0.63
  24  -4 -26   -0.01    0.53
  26  -4 -26    1.31    0.68
 -23  -3 -26    2.42    0.95
 -21  -3 -26    0.60    0.74
 -19  -3 -26    8.31    1.19
 -17  -3 -26    1.17    0.75
 -15  -3 -26    0.92    0.66
 -13  -3 -26   16.83    1.39
 -11  -3 -26    3.74    0.79
  -7  -3 -26    0.62    0.28
  -5  -3 -26    1.18    0.29
  -3  -3 -26    1.04    0.28
  -1  -3 -26   13.78    0.73
   1  -3 -26    8.40    0.54
   3  -3 -26    7.37    0.74
   5  -3 -26    8.71    0.86
   7  -3 -26    9.28    0.90
   9  -3 -26    2.95    0.61
  11  -3 -26    3.07    0.64
  13  -3 -26   24.36    1.64
  15  -3 -26    1.59    0.56
  17  -3 -26    1.37    0.53
  19  -3 -26    0.89    0.54
  21  -3 -26    0.57    0.51
  23  -3 -26    8.92    1.11
  25  -3 -26    0.14    0.58
  27  -3 -26    1.86    0.72
 -24  -2 -26   13.26    1.59
 -22  -2 -26   10.36    1.32
 -20  -2 -26    6.89    1.13
 -18  -2 -26   29.15    1.95
 -16  -2 -26    0.06    0.53
 -14  -2 -26   14.91    1.28
 -12  -2 -26    4.04    0.75
 -10  -2 -26    5.24    0.49
  -8  -2 -26   26.21    1.13
  -6  -2 -26    6.33    0.49
  -4  -2 -26    0.39    0.31
  -2  -2 -26    1.03    0.28
   0  -2 -26    8.95    0.52
   2  -2 -26    4.24    0.56
   4  -2 -26    0.62    0.36
   6  -2 -26    8.42    0.82
   8  -2 -26    1.02    0.42
  10  -2 -26   13.48    1.08
  12  -2 -26    1.93    0.55
  16  -2 -26    2.15    0.58
  18  -2 -26    1.04    0.52
  20  -2 -26    1.21    0.54
  22  -2 -26    0.05    0.45
  24  -2 -26    2.06    0.69
  26  -2 -26   -0.04    0.49
  28  -2 -26    3.37    0.86
 -23  -1 -26    0.04    0.68
 -21  -1 -26    2.92    0.88
 -19  -1 -26   10.05    1.19
 -17  -1 -26   23.36    1.73
 -15  -1 -26    0.18    0.54
 -13  -1 -26    3.87    0.46
 -11  -1 -26    0.01    0.28
  -9  -1 -26    0.44    0.29
  -7  -1 -26    9.10    0.59
  -5  -1 -26    0.49    0.26
  -3  -1 -26    1.15    0.28
  -1  -1 -26    7.71    0.48
   1  -1 -26    5.33    0.59
   3  -1 -26    3.75    0.52
   5  -1 -26   14.02    1.05
   7  -1 -26   10.23    0.84
   9  -1 -26   27.99    1.73
  11  -1 -26    1.34    0.46
  13  -1 -26   27.93    1.75
  15  -1 -26    8.10    0.90
  17  -1 -26    3.24    0.68
  19  -1 -26    7.85    0.97
  21  -1 -26    1.56    0.55
  23  -1 -26    3.32    0.76
  25  -1 -26    8.69    1.10
  27  -1 -26    1.39    0.61
 -24   0 -26    3.78    1.04
 -22   0 -26    3.19    0.94
 -20   0 -26    0.81    0.60
 -18   0 -26   57.02    3.36
 -16   0 -26    1.72    0.68
 -14   0 -26    0.89    0.34
 -12   0 -26   12.98    0.75
 -10   0 -26   17.96    0.90
  -8   0 -26    8.63    0.58
  -6   0 -26    1.37    0.32
  -4   0 -26   57.72    2.10
  -2   0 -26   -0.21    0.19
   0   0 -26   35.50    1.95
   2   0 -26   49.01    2.59
   4   0 -26   39.41    2.12
   6   0 -26   44.59    2.30
   8   0 -26   35.84    1.98
  10   0 -26   23.78    1.49
  12   0 -26    0.00    0.37
  14   0 -26    0.48    0.43
  16   0 -26   38.18    2.22
  18   0 -26    0.04    0.37
  20   0 -26   11.50    1.09
  22   0 -26    0.25    0.41
  24   0 -26    2.99    0.69
  26   0 -26    1.99    0.62
 -23   1 -26    0.91    0.76
 -21   1 -26    5.88    1.06
 -19   1 -26    9.24    1.20
 -17   1 -26   20.14    1.68
 -15   1 -26    0.38    0.53
 -13   1 -26    3.65    0.48
 -11   1 -26    0.02    0.26
  -9   1 -26    0.82    0.31
  -7   1 -26    9.88    0.62
  -5   1 -26    0.38    0.26
  -3   1 -26    1.22    0.29
  -1   1 -26    7.84    0.75
   1   1 -26    4.47    0.58
   3   1 -26    4.49    0.56
   5   1 -26   16.09    1.08
   7   1 -26    9.07    0.82
   9   1 -26   29.61    1.70
  11   1 -26    0.86    0.42
  13   1 -26   29.07    1.69
  15   1 -26    6.73    0.80
  17   1 -26    5.21    0.71
  19   1 -26    9.38    0.93
  21   1 -26    0.80    0.44
  23   1 -26    4.62    0.74
 -24   2 -26   13.80    1.65
 -22   2 -26    8.56    1.30
 -20   2 -26    7.26    1.15
 -18   2 -26   25.90    1.96
 -16   2 -26    0.48    0.57
 -14   2 -26   12.34    1.21
 -12   2 -26    5.47    0.54
 -10   2 -26    5.05    0.52
  -8   2 -26   26.41    1.18
  -6   2 -26    5.43    0.50
  -4   2 -26    0.49    0.29
  -2   2 -26    1.39    0.34
   0   2 -26    9.28    0.85
   2   2 -26    6.30    0.67
   4   2 -26    0.19    0.32
   6   2 -26    8.85    0.80
   8   2 -26    0.61    0.38
  10   2 -26   12.15    0.98
  12   2 -26    1.01    0.41
  14   2 -26    2.00    0.49
  16   2 -26    1.29    0.46
  18   2 -26    1.15    0.30
  20   2 -26    1.46    0.34
  22   2 -26    0.26    0.43
  24   2 -26    3.17    0.69
  26   2 -26   -0.21    0.42
 -23   3 -26    2.15    0.87
 -21   3 -26    1.34    0.76
 -19   3 -26    7.39    1.16
 -17   3 -26    1.09    0.69
 -15   3 -26    1.31    0.61
 -13   3 -26   16.79    1.36
 -11   3 -26    5.15    0.76
  -9   3 -26    8.06    0.64
  -7   3 -26    0.73    0.31
  -5   3 -26    0.93    0.34
  -3   3 -26    1.52    0.34
  -1   3 -26   14.79    0.78
   1   3 -26    9.31    0.56
   3   3 -26    7.25    0.77
   5   3 -26   11.35    0.93
   7   3 -26   11.20    0.89
   9   3 -26    2.50    0.52
  11   3 -26    2.91    0.51
  13   3 -26   22.12    1.02
  15   3 -26    2.13    0.34
  17   3 -26    2.60    0.38
  19   3 -26    1.58    0.51
  21   3 -26   -0.24    0.35
  23   3 -26    9.52    1.07
  25   3 -26    1.04    0.61
  27   3 -26    0.68    0.62
 -22   4 -26   -0.11    0.67
 -20   4 -26    3.11    0.89
 -18   4 -26    0.02    0.58
 -16   4 -26    0.61    0.56
 -14   4 -26    1.18    0.60
 -12   4 -26    5.68    0.83
 -10   4 -26    1.14    0.55
  -8   4 -26    6.14    0.59
  -6   4 -26   -0.20    0.28
  -4   4 -26    1.23    0.34
  -2   4 -26    0.33    0.29
   0   4 -26    1.67    0.50
   2   4 -26    4.82    0.44
   4   4 -26   24.57    1.55
   6   4 -26   49.19    2.60
   8   4 -26    0.46    0.36
  10   4 -26   64.58    2.32
  12   4 -26    3.58    0.41
  14   4 -26    6.52    0.78
  16   4 -26    4.33    0.67
  18   4 -26    0.12    0.35
  20   4 -26    5.32    0.83
  22   4 -26    0.42    0.48
  24   4 -26    0.72    0.57
  26   4 -26    3.03    0.81
 -21   5 -26    0.09    0.65
 -19   5 -26   -0.67    0.56
 -17   5 -26    2.85    0.83
 -15   5 -26    0.83    0.65
 -13   5 -26    3.24    0.78
 -11   5 -26    0.85    0.56
  -9   5 -26    9.75    1.07
  -7   5 -26   19.93    1.56
  -5   5 -26   48.07    1.92
  -3   5 -26   18.50    0.98
  -1   5 -26    0.68    0.45
   1   5 -26   44.17    1.71
   3   5 -26    4.51    0.46
   5   5 -26   26.38    1.62
   7   5 -26    6.11    0.51
   9   5 -26   14.53    0.80
  11   5 -26   19.59    1.36
  13   5 -26   14.42    1.15
  15   5 -26    2.17    0.56
  17   5 -26    0.69    0.47
  19   5 -26    0.81    0.48
  21   5 -26    5.41    0.88
  23   5 -26    1.42    0.66
  25   5 -26    0.96    0.63
 -18   6 -26    1.73    0.81
 -16   6 -26    0.70    0.68
 -14   6 -26   -0.38    0.58
 -12   6 -26    4.09    0.87
 -10   6 -26    6.20    0.94
  -8   6 -26    1.26    0.59
  -6   6 -26    0.28    0.53
  -4   6 -26    2.84    0.67
  -2   6 -26    0.26    0.31
   0   6 -26    2.85    0.44
   2   6 -26   10.71    0.73
   4   6 -26   12.98    1.09
   6   6 -26    0.63    0.28
   8   6 -26   11.23    1.04
  10   6 -26    6.02    0.80
  12   6 -26   14.63    1.22
  14   6 -26    2.10    0.60
  16   6 -26    1.52    0.53
  18   6 -26    8.48    1.03
  20   6 -26   18.80    1.55
  22   6 -26    0.36    0.55
 -15   7 -26    0.24    0.67
 -13   7 -26   29.24    2.22
 -11   7 -26    4.25    0.91
  -9   7 -26    4.41    0.89
  -7   7 -26    4.40    0.90
  -5   7 -26   17.89    1.57
  -3   7 -26    5.81    0.85
  -1   7 -26    1.63    0.57
   1   7 -26    9.50    1.05
   3   7 -26    0.43    0.44
   5   7 -26    3.52    0.68
   7   7 -26    0.28    0.40
   9   7 -26   -0.12    0.39
  11   7 -26    9.09    1.02
  13   7 -26    0.57    0.46
  15   7 -26    1.45    0.59
  17   7 -26    0.13    0.51
  19   7 -26   -0.26    0.45
 -12   8 -26    0.02    0.70
 -10   8 -26    6.67    1.10
  -8   8 -26   -0.05    0.61
  -4   8 -26    1.80    0.65
  -2   8 -26    4.46    0.84
   6   8 -26    1.59    0.60
   8   8 -26   25.69    1.78
  10   8 -26    0.39    0.50
  12   8 -26    0.94    0.55
  14   8 -26    2.26    0.66
  16   8 -26    0.91    0.58
  -7   9 -26    0.67    0.64
   9   9 -26    2.51    0.71
  11   9 -26    3.21    0.78
  -9  -9 -25    0.10    0.69
  -7  -9 -25    5.22    1.00
  -5  -9 -25    6.23    1.06
  -3  -9 -25    1.37    0.76
  -1  -9 -25   12.79    1.39
   1  -9 -25    2.25    0.82
   3  -9 -25   -0.29    0.67
   5  -9 -25    1.98    0.81
 -12  -8 -25   11.25    1.31
 -10  -8 -25    2.06    0.81
  -8  -8 -25    0.07    0.60
  -6  -8 -25    5.68    1.00
  -4  -8 -25    0.51    0.58
  -2  -8 -25    3.77    0.83
   0  -8 -25    1.30    0.68
   2  -8 -25    0.32    0.60
   4  -8 -25    2.44    0.74
  10  -8 -25    0.77    0.55
  12  -8 -25   21.06    1.66
  14  -8 -25    2.16    0.69
  16  -8 -25    3.14    0.84
 -15  -7 -25    0.18    0.66
 -13  -7 -25    1.74    0.73
 -11  -7 -25    8.40    1.05
  -9  -7 -25    6.39    0.98
  -7  -7 -25   -0.52    0.48
  -5  -7 -25    0.61    0.54
  -3  -7 -25    0.14    0.51
  -1  -7 -25   -0.26    0.50
   1  -7 -25    2.70    0.70
   3  -7 -25    8.80    1.00
   7  -7 -25    1.39    0.56
   9  -7 -25    8.44    0.99
  11  -7 -25    1.71    0.59
  13  -7 -25    0.27    0.49
  15  -7 -25    1.88    0.66
  17  -7 -25    1.11    0.62
  19  -7 -25    1.51    0.61
 -16  -6 -25    8.58    1.20
 -14  -6 -25    0.03    0.60
 -12  -6 -25    3.00    0.74
 -10  -6 -25    3.40    0.75
  -8  -6 -25    0.72    0.55
  -6  -6 -25    6.73    0.87
  -4  -6 -25   -0.01    0.44
  -2  -6 -25   37.80    2.24
   0  -6 -25    0.50    0.50
   2  -6 -25   30.67    1.94
   4  -6 -25    3.95    0.47
   6  -6 -25    3.48    0.64
   8  -6 -25    1.68    0.55
  10  -6 -25    0.47    0.46
  12  -6 -25    0.74    0.48
  14  -6 -25    2.40    0.67
  16  -6 -25    1.23    0.58
  18  -6 -25    0.53    0.51
  20  -6 -25    5.78    0.93
  22  -6 -25    0.08    0.50
 -21  -5 -25   -0.60    0.82
 -19  -5 -25    3.59    1.02
 -17  -5 -25    7.28    1.17
 -13  -5 -25    0.79    0.61
 -11  -5 -25    0.46    0.55
  -9  -5 -25    0.45    0.50
  -7  -5 -25    8.42    0.95
  -5  -5 -25   12.29    1.07
  -3  -5 -25   55.44    3.08
  -1  -5 -25   29.47    1.27
   1  -5 -25    7.60    0.56
   3  -5 -25   16.25    0.84
   5  -5 -25   15.66    1.16
   7  -5 -25    5.48    0.78
   9  -5 -25   25.07    1.66
  11  -5 -25    2.19    0.59
  13  -5 -25   33.79    2.23
  15  -5 -25    0.63    0.49
  17  -5 -25    6.18    0.91
  19  -5 -25    2.89    0.74
  21  -5 -25    2.43    0.71
  23  -5 -25   14.06    1.48
 -22  -4 -25    2.42    0.97
 -20  -4 -25    0.13    0.76
 -18  -4 -25   -0.25    0.64
 -16  -4 -25   -1.11    0.60
 -14  -4 -25    1.24    0.76
 -12  -4 -25    5.02    0.83
 -10  -4 -25    0.10    0.50
  -8  -4 -25   18.98    1.36
  -6  -4 -25   60.93    3.27
  -4  -4 -25    7.84    0.53
  -2  -4 -25   18.33    0.87
   0  -4 -25   13.22    0.72
   2  -4 -25    0.03    0.25
   4  -4 -25    0.41    0.29
   6  -4 -25    0.14    0.36
   8  -4 -25    0.81    0.46
  10  -4 -25    4.91    0.76
  12  -4 -25    0.43    0.44
  14  -4 -25   26.36    1.78
  16  -4 -25   -0.57    0.34
  18  -4 -25    0.72    0.50
  20  -4 -25    0.73    0.51
  22  -4 -25    0.13    0.52
  24  -4 -25    0.56    0.59
  26  -4 -25    0.57    0.59
 -23  -3 -25    0.14    0.73
 -21  -3 -25    0.13    0.63
 -19  -3 -25   -0.04    0.64
 -17  -3 -25    2.17    0.80
 -15  -3 -25    3.19    0.82
 -13  -3 -25   10.01    1.08
 -11  -3 -25   13.45    1.23
  -7  -3 -25   18.85    0.88
  -5  -3 -25   33.77    1.36
  -3  -3 -25   12.56    0.68
  -1  -3 -25   57.30    2.06
   1  -3 -25   13.37    0.70
   3  -3 -25   16.67    0.79
   5  -3 -25   54.52    2.77
   7  -3 -25    0.51    0.40
   9  -3 -25    2.45    0.56
  11  -3 -25   25.09    1.64
  13  -3 -25    4.81    0.76
  15  -3 -25    6.26    0.84
  17  -3 -25    9.66    1.04
  19  -3 -25    7.40    0.96
  21  -3 -25   11.54    1.21
  23  -3 -25   11.32    1.26
  25  -3 -25    3.15    0.84
  27  -3 -25    1.79    0.74
 -24  -2 -25    0.49    0.81
 -22  -2 -25    6.11    1.10
 -20  -2 -25    0.54    0.66
 -18  -2 -25    8.67    1.14
 -16  -2 -25   -0.54    0.52
 -14  -2 -25    3.04    0.74
 -12  -2 -25    0.40    0.59
 -10  -2 -25   64.54    2.33
  -8  -2 -25   50.32    1.91
  -6  -2 -25   61.08    2.17
  -4  -2 -25    9.99    0.56
  -2  -2 -25   34.20    1.31
   0  -2 -25   11.81    0.61
   2  -2 -25   75.84    2.58
   4  -2 -25   12.93    0.63
   6  -2 -25    4.87    0.62
   8  -2 -25    8.51    0.85
  10  -2 -25    0.71    0.43
  12  -2 -25   -0.82    0.31
  14  -2 -25   16.06    1.28
  16  -2 -25    3.08    0.67
  18  -2 -25   15.63    1.27
  20  -2 -25    2.89    0.69
  22  -2 -25    1.02    0.58
  24  -2 -25   10.29    1.18
  26  -2 -25    2.15    0.72
  28  -2 -25    2.82    0.78
 -23  -1 -25    1.47    0.78
 -21  -1 -25    2.05    0.82
 -19  -1 -25   18.28    1.68
 -17  -1 -25    6.72    0.96
 -15  -1 -25    0.13    0.50
 -13  -1 -25    3.61    0.44
 -11  -1 -25    5.44    0.50
  -9  -1 -25    3.32    0.40
  -7  -1 -25   40.37    1.55
  -5  -1 -25    0.21    0.24
  -3  -1 -25    8.77    0.52
  -1  -1 -25    1.61    0.28
   1  -1 -25    5.51    0.38
   3  -1 -25    1.03    0.35
   5  -1 -25    2.72    0.47
   7  -1 -25    4.79    0.61
   9  -1 -25   10.66    0.91
  11  -1 -25    0.21    0.38
  13  -1 -25    2.23    0.56
  15  -1 -25   13.01    1.12
  17  -1 -25    5.05    0.78
  19  -1 -25    3.41    0.70
  21  -1 -25    1.17    0.56
  23  -1 -25    5.27    0.84
  25  -1 -25   -0.01    0.47
  27  -1 -25    1.76    0.68
 -24   0 -25    0.66    0.74
 -22   0 -25    0.63    0.73
 -20   0 -25    1.17    0.65
 -18   0 -25    0.74    0.63
 -16   0 -25   -0.24    0.44
 -14   0 -25    0.07    0.43
 -12   0 -25   -0.27    0.25
 -10   0 -25    0.39    0.28
  -8   0 -25    0.04    0.25
  -6   0 -25   -0.33    0.24
  -4   0 -25    1.05    0.27
  -2   0 -25   -0.15    0.20
   0   0 -25    1.62    0.37
   2   0 -25    1.31    0.36
   4   0 -25    0.98    0.32
   6   0 -25    0.00    0.29
   8   0 -25   -0.13    0.28
  10   0 -25    0.47    0.36
  12   0 -25   -0.30    0.33
  14   0 -25    0.32    0.40
  16   0 -25    0.69    0.44
  18   0 -25    0.65    0.43
  20   0 -25    0.16    0.38
  22   0 -25   -0.11    0.41
  24   0 -25    0.52    0.46
  26   0 -25    0.74    0.53
 -25   1 -25    0.83    0.82
 -23   1 -25    1.24    0.77
 -21   1 -25    3.27    0.92
 -19   1 -25   19.67    1.67
 -17   1 -25    5.57    0.93
 -15   1 -25    0.60    0.54
 -13   1 -25    4.47    0.50
 -11   1 -25    5.80    0.53
  -9   1 -25    3.20    0.43
  -7   1 -25   41.12    1.58
  -5   1 -25    0.26    0.24
  -3   1 -25    9.20    0.56
  -1   1 -25    1.63    0.29
   1   1 -25    6.35    0.65
   3   1 -25    0.86    0.33
   5   1 -25    3.28    0.51
   7   1 -25    3.87    0.57
   9   1 -25    9.72    0.86
  11   1 -25    0.40    0.37
  13   1 -25    1.33    0.44
  15   1 -25   11.98    1.02
  17   1 -25    5.83    0.74
  19   1 -25    2.72    0.60
  21   1 -25    1.89    0.55
  23   1 -25    2.94    0.65
 -24   2 -25    1.61    0.88
 -22   2 -25    7.09    1.17
 -20   2 -25   -0.47    0.55
 -18   2 -25    6.63    1.05
 -16   2 -25    0.10    0.52
 -14   2 -25    4.79    0.81
 -12   2 -25    0.19    0.30
 -10   2 -25   62.82    2.39
  -8   2 -25   52.38    1.99
  -6   2 -25   57.79    2.22
  -4   2 -25    8.51    0.59
  -2   2 -25   34.45    1.37
   0   2 -25   13.08    0.66
   2   2 -25   82.18    3.54
   4   2 -25   11.95    0.95
   6   2 -25    4.57    0.58
   8   2 -25    8.50    0.81
  10   2 -25    0.03    0.34
  12   2 -25   -0.04    0.34
  14   2 -25   15.89    1.14
  16   2 -25    3.43    0.41
  18   2 -25   13.72    0.77
  20   2 -25    3.79    0.44
  22   2 -25    2.06    0.55
  24   2 -25   11.05    1.10
  26   2 -25    1.01    0.57
 -23   3 -25    1.86    0.83
 -21   3 -25    1.20    0.75
 -19   3 -25    1.14    0.68
 -17   3 -25    1.64    0.72
 -15   3 -25    3.65    0.79
 -13   3 -25    8.85    1.02
 -11   3 -25   13.41    1.18
  -9   3 -25   23.71    1.16
  -7   3 -25   19.13    0.96
  -5   3 -25   37.42    1.49
  -3   3 -25   12.86    0.74
  -1   3 -25   60.31    2.14
   1   3 -25   13.87    0.72
   3   3 -25   16.45    0.79
   5   3 -25   51.54    2.75
   7   3 -25    0.39    0.35
   9   3 -25    2.91    0.52
  11   3 -25   24.11    1.06
  13   3 -25    4.30    0.43
  15   3 -25    5.32    0.48
  17   3 -25    9.06    0.62
  19   3 -25    5.24    0.76
  21   3 -25    8.87    0.99
  23   3 -25   11.24    1.12
  25   3 -25    3.03    0.71
  27   3 -25    1.86    0.72
 -22   4 -25    2.42    0.90
 -20   4 -25    0.91    0.67
 -18   4 -25    0.02    0.58
 -16   4 -25    0.75    0.60
 -14   4 -25    2.59    0.72
 -12   4 -25    4.98    0.83
 -10   4 -25    0.97    0.50
  -8   4 -25   18.81    1.00
  -6   4 -25   64.88    2.41
  -4   4 -25    7.49    0.61
  -2   4 -25   18.38    0.93
   0   4 -25   15.45    1.14
   2   4 -25    0.31    0.26
   4   4 -25    0.40    0.40
   6   4 -25    0.27    0.35
   8   4 -25    0.73    0.27
  10   4 -25    5.63    0.48
  12   4 -25   -0.18    0.21
  14   4 -25   25.60    1.65
  16   4 -25    0.20    0.35
  18   4 -25    0.06    0.36
  20   4 -25   -0.18    0.36
  22   4 -25   -0.14    0.43
  24   4 -25    0.29    0.49
  26   4 -25    0.41    0.60
 -21   5 -25   -0.88    0.61
 -19   5 -25    2.11    0.83
 -17   5 -25    8.45    1.15
 -15   5 -25    1.32    0.69
 -13   5 -25   -0.25    0.46
 -11   5 -25    0.27    0.45
  -9   5 -25    0.55    0.49
  -7   5 -25   10.15    1.03
  -5   5 -25   12.23    0.80
  -3   5 -25   59.53    2.27
  -1   5 -25   31.79    1.95
   1   5 -25    7.60    0.59
   3   5 -25   15.87    0.85
   5   5 -25   15.78    0.81
   7   5 -25    7.38    0.55
   9   5 -25   24.13    1.09
  11   5 -25    2.22    0.53
  13   5 -25   39.60    2.20
  15   5 -25    0.74    0.42
  17   5 -25    6.88    0.87
  19   5 -25    3.14    0.67
  21   5 -25    2.27    0.64
  23   5 -25   18.03    1.49
  25   5 -25    5.80    0.97
 -18   6 -25    3.68    1.00
 -16   6 -25   10.32    1.32
 -14   6 -25   -0.34    0.55
 -12   6 -25    1.77    0.72
 -10   6 -25    5.78    0.91
  -8   6 -25   -0.12    0.45
  -6   6 -25    6.33    0.91
  -4   6 -25    0.53    0.48
  -2   6 -25   36.30    1.60
   0   6 -25    0.08    0.28
   2   6 -25   30.79    1.36
   4   6 -25    3.82    0.44
   6   6 -25    2.68    0.39
   8   6 -25    1.01    0.44
  10   6 -25    0.37    0.39
  12   6 -25    0.14    0.36
  14   6 -25    1.83    0.54
 -17   7 -25    0.16    0.72
 -15   7 -25   -0.03    0.65
 -13   7 -25    1.85    0.74
 -11   7 -25    8.36    1.13
  -9   7 -25    6.46    1.02
  -7   7 -25    1.16    0.65
  -5   7 -25   -0.21    0.50
  -3   7 -25    0.04    0.42
  -1   7 -25    0.24    0.48
   1   7 -25    1.85    0.62
   3   7 -25    8.60    0.65
   5   7 -25   41.88    2.43
   7   7 -25    1.24    0.46
   9   7 -25    6.42    0.84
  11   7 -25    0.02    0.41
  13   7 -25   -0.13    0.39
 -14   8 -25    3.83    1.03
 -12   8 -25   12.47    1.47
 -10   8 -25    0.91    0.73
  -8   8 -25   -0.25    0.55
  -4   8 -25    0.17    0.50
  -2   8 -25    2.96    0.74
   0   8 -25    1.43    0.63
   2   8 -25    0.99    0.51
   6   8 -25    6.72    0.88
   8   8 -25   -0.11    0.42
  10   8 -25   -0.18    0.43
  12   8 -25   20.58    1.59
  -7   9 -25    5.29    1.01
  -5   9 -25    3.95    0.93
  -3   9 -25    0.13    0.54
  -1   9 -25   11.37    1.30
   9   9 -25    0.01    0.50
  11   9 -25    1.69    0.67
  13   9 -25    0.56    0.55
   0 -10 -24    2.11    0.89
   2 -10 -24    0.15    0.76
   4 -10 -24    2.02    0.89
  -9  -9 -24    0.77    0.75
  -7  -9 -24    2.60    0.91
  -5  -9 -24    3.71    0.91
  -3  -9 -24    1.99    0.80
  -1  -9 -24    2.73    0.83
   1  -9 -24    0.93    0.74
   3  -9 -24    1.11    0.71
   5  -9 -24    3.20    0.86
 -14  -8 -24    6.48    1.06
 -12  -8 -24    0.25    0.64
 -10  -8 -24    3.05    0.87
  -8  -8 -24    4.26    0.91
  -6  -8 -24    1.98    0.72
  -4  -8 -24   -0.03    0.55
  -2  -8 -24    5.70    0.92
   0  -8 -24   11.61    1.23
   2  -8 -24   -0.05    0.56
   4  -8 -24   18.44    1.58
  10  -8 -24    2.38    0.67
  12  -8 -24    5.20    0.88
  14  -8 -24    1.33    0.64
  16  -8 -24    0.87    0.56
  18  -8 -24    4.43    0.90
 -17  -7 -24   -0.35    0.65
 -15  -7 -24    2.40    0.84
 -13  -7 -24    2.63    0.78
 -11  -7 -24    3.00    0.76
  -9  -7 -24    0.57    0.62
  -7  -7 -24    7.92    1.01
  -5  -7 -24    8.45    1.01
  -3  -7 -24   13.91    1.28
  -1  -7 -24    5.77    0.87
   1  -7 -24   17.05    1.46
   3  -7 -24    2.28    0.66
   7  -7 -24   24.51    1.65
   9  -7 -24    3.06    0.67
  11  -7 -24    0.62    0.49
  13  -7 -24    0.80    0.55
  15  -7 -24    2.32    0.67
  17  -7 -24   10.73    1.21
  19  -7 -24    0.74    0.61
 -16  -6 -24    0.29    0.59
 -14  -6 -24    0.40    0.58
 -12  -6 -24    2.37    0.71
 -10  -6 -24    4.62    0.82
  -8  -6 -24    1.19    0.59
  -6  -6 -24    3.23    0.68
  -4  -6 -24   25.13    1.67
  -2  -6 -24    1.13    0.53
   0  -6 -24   38.37    2.33
   2  -6 -24   12.25    0.74
   4  -6 -24   10.62    0.94
   6  -6 -24    7.68    0.85
   8  -6 -24    4.56    0.73
  10  -6 -24    7.80    0.96
  12  -6 -24    1.29    0.56
  14  -6 -24    9.91    1.11
  16  -6 -24    0.81    0.56
  18  -6 -24    5.45    0.90
  20  -6 -24    0.56    0.54
  22  -6 -24   14.05    1.44
 -21  -5 -24   -0.42    0.70
 -19  -5 -24   27.08    2.14
 -17  -5 -24    5.94    1.10
 -15  -5 -24   16.33    1.48
 -13  -5 -24    6.07    0.91
 -11  -5 -24    1.37    0.59
  -9  -5 -24    0.34    0.46
  -7  -5 -24   26.13    1.68
  -5  -5 -24    5.98    0.79
  -3  -5 -24   -0.49    0.41
  -1  -5 -24    8.69    0.59
   1  -5 -24   -0.50    0.23
   3  -5 -24   11.24    0.68
   5  -5 -24   39.66    2.15
   7  -5 -24   48.86    2.60
   9  -5 -24    2.94    0.64
  11  -5 -24   43.61    2.58
  13  -5 -24    1.57    0.52
  15  -5 -24    1.49    0.54
  17  -5 -24    0.17    0.43
  19  -5 -24    6.34    0.93
  21  -5 -24    1.05    0.58
  23  -5 -24    3.43    0.82
  25  -5 -24    0.78    0.57
 -22  -4 -24    9.56    1.38
 -20  -4 -24    0.87    0.71
 -18  -4 -24   30.81    2.21
 -16  -4 -24    1.03    0.77
 -12  -4 -24    3.69    0.71
 -10  -4 -24    0.10    0.49
  -8  -4 -24   14.74    1.19
  -6  -4 -24   13.53    1.14
  -4  -4 -24   71.41    2.56
  -2  -4 -24    6.88    0.49
   0  -4 -24    7.85    0.53
   2  -4 -24   24.08    1.03
   4  -4 -24   31.35    1.82
   6  -4 -24   -0.07    0.36
   8  -4 -24   17.73    1.33
  10  -4 -24   17.18    1.38
  12  -4 -24    4.41    0.74
  14  -4 -24   65.23    3.47
  16  -4 -24    0.25    0.43
  18  -4 -24    4.44    0.81
  20  -4 -24    2.99    0.73
  22  -4 -24    5.76    0.94
  24  -4 -24   -0.61    0.45
  26  -4 -24    1.87    0.72
 -23  -3 -24    0.50    0.77
 -21  -3 -24    0.86    0.80
 -19  -3 -24   -0.53    0.52
 -17  -3 -24    0.53    0.62
 -15  -3 -24    0.82    0.66
 -13  -3 -24   -0.16    0.60
 -11  -3 -24    5.61    0.85
  -9  -3 -24    0.72    0.50
  -7  -3 -24    3.01    0.37
  -5  -3 -24    0.19    0.23
  -3  -3 -24    0.69    0.25
  -1  -3 -24   17.36    0.81
   1  -3 -24   30.79    1.20
   3  -3 -24   73.31    2.56
   5  -3 -24   32.92    1.86
   7  -3 -24   -0.36    0.32
   9  -3 -24   22.57    1.51
  11  -3 -24    4.41    0.67
  13  -3 -24   -0.58    0.38
  15  -3 -24   13.22    1.19
  17  -3 -24    1.89    0.60
  19  -3 -24    4.80    0.82
  21  -3 -24    0.28    0.51
  23  -3 -24    7.08    1.01
  25  -3 -24    1.93    0.69
  27  -3 -24    0.61    0.61
 -24  -2 -24    0.90    0.81
 -22  -2 -24    1.74    0.80
 -20  -2 -24    0.90    0.64
 -18  -2 -24   -0.12    0.58
 -16  -2 -24    2.72    0.73
 -14  -2 -24    0.60    0.61
 -12  -2 -24    9.10    0.97
 -10  -2 -24   17.76    0.86
  -8  -2 -24   10.42    0.62
  -6  -2 -24   13.97    0.95
  -4  -2 -24   34.01    1.32
  -2  -2 -24    6.38    0.44
   0  -2 -24    8.96    0.51
   2  -2 -24  119.61    3.91
   4  -2 -24   19.03    0.82
   6  -2 -24   45.51    2.38
   8  -2 -24    2.22    0.51
  10  -2 -24    4.02    0.64
  12  -2 -24    4.96    0.74
  14  -2 -24   19.94    1.41
  16  -2 -24   -0.38    0.39
  18  -2 -24   16.83    1.34
  20  -2 -24    0.65    0.50
  22  -2 -24   -0.29    0.43
  24  -2 -24    0.61    0.54
  26  -2 -24   15.26    1.47
  28  -2 -24    2.88    0.80
  30  -2 -24    7.38    1.12
 -25  -1 -24    8.40    1.25
 -23  -1 -24    1.60    0.77
 -21  -1 -24    0.46    0.61
 -19  -1 -24    1.43    0.71
 -17  -1 -24    0.59    0.55
 -15  -1 -24    1.75    0.63
 -13  -1 -24   -0.02    0.26
 -11  -1 -24    6.22    0.52
  -9  -1 -24   12.09    0.70
  -7  -1 -24   35.58    1.41
  -5  -1 -24    9.32    0.57
  -3  -1 -24    2.29    0.32
  -1  -1 -24    1.55    0.26
   1  -1 -24   23.82    0.93
   3  -1 -24   82.45    4.09
   5  -1 -24   41.03    2.14
   7  -1 -24   -0.18    0.27
   9  -1 -24   21.38    1.42
  11  -1 -24    5.41    0.73
  13  -1 -24   34.61    1.97
  15  -1 -24   11.91    1.09
  17  -1 -24    6.59    0.86
  19  -1 -24   15.51    1.32
  21  -1 -24    1.27    0.53
  23  -1 -24    1.60    0.58
  25  -1 -24    1.40    0.58
  27  -1 -24    0.16    0.53
 -24   0 -24   37.99    2.73
 -22   0 -24    3.63    0.96
 -20   0 -24   41.44    2.71
 -18   0 -24   -0.66    0.46
 -16   0 -24    2.67    0.67
 -14   0 -24   80.30    4.26
 -12   0 -24    1.23    0.34
 -10   0 -24   16.22    0.84
  -8   0 -24    4.45    0.43
  -6   0 -24    0.06    0.25
  -4   0 -24    1.07    0.29
  -2   0 -24    3.59    0.33
   0   0 -24    8.38    0.45
   2   0 -24   30.29    1.73
   4   0 -24   16.59    1.09
   6   0 -24    0.87    0.35
   8   0 -24    1.47    0.44
  10   0 -24    9.94    0.88
  12   0 -24   59.12    2.95
  14   0 -24   65.67    3.37
  16   0 -24   15.72    1.21
  18   0 -24   -0.14    0.36
  20   0 -24    9.22    0.97
  22   0 -24    0.29    0.42
  24   0 -24   17.27    1.39
  26   0 -24    1.45    0.58
 -25   1 -24    7.37    1.29
 -23   1 -24    2.10    0.86
 -21   1 -24    1.00    0.67
 -19   1 -24    1.29    0.69
 -17   1 -24   -0.17    0.51
 -15   1 -24    1.39    0.58
 -13   1 -24   -0.39    0.44
 -11   1 -24    5.53    0.52
  -9   1 -24   11.52    0.72
  -7   1 -24   36.04    1.44
  -5   1 -24    9.73    0.60
  -3   1 -24    1.90    0.32
  -1   1 -24    1.28    0.26
   1   1 -24   25.94    1.07
   3   1 -24   85.48    4.11
   5   1 -24   42.52    2.15
   7   1 -24    0.00    0.31
   9   1 -24   22.82    1.41
  11   1 -24    7.68    0.77
  13   1 -24   31.15    1.87
  15   1 -24   11.31    1.00
  17   1 -24    7.21    0.81
  19   1 -24   17.21    1.27
  21   1 -24    1.37    0.50
  23   1 -24    1.13    0.51
 -24   2 -24    1.89    0.90
 -22   2 -24    0.45    0.65
 -20   2 -24    0.04    0.65
 -18   2 -24    1.16    0.65
 -16   2 -24    1.66    0.66
 -14   2 -24    1.52    0.58
 -12   2 -24    7.02    0.90
 -10   2 -24   17.70    0.91
  -8   2 -24    9.05    0.65
  -6   2 -24   13.42    0.77
  -4   2 -24   34.07    1.38
  -2   2 -24    6.63    0.49
   0   2 -24    8.96    0.54
   2   2 -24  117.82    3.88
   4   2 -24   17.52    1.21
   6   2 -24   43.94    2.34
   8   2 -24    2.97    0.52
  10   2 -24    3.70    0.56
  12   2 -24    6.98    0.73
  14   2 -24   18.01    1.25
  16   2 -24    0.04    0.23
  18   2 -24   16.84    0.84
  20   2 -24    0.41    0.27
  22   2 -24    0.20    0.42
  24   2 -24    0.27    0.43
  26   2 -24   15.88    1.37
 -23   3 -24    0.62    0.78
 -21   3 -24    0.46    0.63
 -19   3 -24    0.35    0.61
 -17   3 -24    1.42    0.67
 -15   3 -24    1.32    0.64
 -13   3 -24    0.34    0.49
 -11   3 -24    4.94    0.77
  -9   3 -24    0.18    0.29
  -7   3 -24    2.56    0.41
  -5   3 -24    0.46    0.30
  -3   3 -24    0.16    0.26
  -1   3 -24   16.34    0.84
   1   3 -24   31.19    1.22
   3   3 -24   74.49    2.56
   5   3 -24   31.89    1.85
   7   3 -24   -0.09    0.31
   9   3 -24   23.77    1.01
  11   3 -24    3.42    0.38
  13   3 -24    0.22    0.23
  15   3 -24   12.11    0.70
  17   3 -24    1.62    0.50
  19   3 -24    4.92    0.71
  21   3 -24    0.31    0.38
  23   3 -24    6.78    0.90
  25   3 -24    1.72    0.62
  27   3 -24   -0.07    0.49
 -22   4 -24    9.05    1.36
 -20   4 -24    0.29    0.61
 -18   4 -24   30.49    2.19
 -16   4 -24    1.17    0.62
 -14   4 -24    3.90    0.79
 -12   4 -24    3.79    0.73
 -10   4 -24    0.06    0.44
  -8   4 -24   13.87    0.85
  -6   4 -24   13.53    0.81
  -4   4 -24   75.48    2.71
  -2   4 -24    7.36    0.58
   0   4 -24    8.96    0.87
   2   4 -24   22.39    1.03
   4   4 -24   31.01    1.86
   6   4 -24   -0.03    0.23
   8   4 -24   18.85    0.89
  10   4 -24   21.12    0.93
  12   4 -24    5.67    0.48
  14   4 -24   62.76    3.29
  16   4 -24   -0.52    0.32
  18   4 -24    6.02    0.78
  20   4 -24    2.34    0.60
  22   4 -24    5.66    0.86
  24   4 -24    0.16    0.52
  26   4 -24    0.87    0.59
  28   4 -24   -0.51    0.54
 -21   5 -24    1.04    0.81
 -19   5 -24   31.98    2.25
 -17   5 -24    6.64    1.10
 -15   5 -24   17.19    1.58
 -13   5 -24    7.53    1.00
 -11   5 -24    0.70    0.54
  -9   5 -24    0.05    0.45
  -7   5 -24   22.84    1.69
  -5   5 -24    6.31    0.57
  -3   5 -24   -0.34    0.26
  -1   5 -24   10.33    0.99
   1   5 -24    0.28    0.26
   3   5 -24   10.99    0.69
   5   5 -24   36.56    1.48
   7   5 -24   46.57    1.76
   9   5 -24    2.25    0.35
  11   5 -24   44.38    2.46
  13   5 -24   -0.09    0.34
  15   5 -24    0.54    0.39
  25   5 -24    0.58    0.54
 -18   6 -24   11.11    1.41
 -16   6 -24    0.37    0.63
 -14   6 -24    0.50    0.63
 -12   6 -24    2.02    0.74
 -10   6 -24    4.30    0.87
  -8   6 -24    1.66    0.61
  -6   6 -24    2.93    0.71
  -4   6 -24   26.94    1.81
  -2   6 -24    0.09    0.42
   0   6 -24   39.45    1.66
   2   6 -24   12.66    0.77
   4   6 -24    8.62    0.63
   6   6 -24    6.16    0.52
   8   6 -24    3.89    0.65
  10   6 -24    9.11    0.89
  12   6 -24    0.47    0.42
  18   6 -24    6.30    0.86
  20   6 -24    0.57    0.49
 -17   7 -24   -0.42    0.65
 -15   7 -24    4.72    0.97
 -13   7 -24    2.95    0.87
 -11   7 -24    3.26    0.86
  -9   7 -24    0.70    0.58
  -7   7 -24    7.86    1.08
  -5   7 -24    8.39    1.08
  -3   7 -24   18.15    1.40
  -1   7 -24    6.35    0.86
   1   7 -24   19.21    1.48
   3   7 -24    1.83    0.38
   5   7 -24    1.13    0.44
   7   7 -24   22.39    1.57
   9   7 -24    0.97    0.45
  11   7 -24    0.45    0.41
  15   7 -24    1.05    0.52
  17   7 -24    8.73    1.05
  19   7 -24   -0.16    0.45
 -14   8 -24    3.53    1.04
 -12   8 -24    0.06    0.62
 -10   8 -24    3.07    0.91
  -8   8 -24    5.28    1.04
  -4   8 -24    0.45    0.53
  -2   8 -24    4.05    0.82
   0   8 -24    9.37    1.12
   2   8 -24    0.47    0.48
   6   8 -24   -0.09    0.39
   8   8 -24   13.80    1.22
  10   8 -24    0.98    0.50
  16   8 -24    0.31    0.53
  -7   9 -24    3.31    0.88
  -5   9 -24    3.50    0.91
  -3   9 -24    0.36    0.53
  -1   9 -24    1.21    0.68
   1   9 -24    0.28    0.54
   9   9 -24    0.14    0.50
  11   9 -24    0.66    0.56
  -2 -10 -23   -0.83    0.65
   0 -10 -23    2.02    0.85
   2 -10 -23    2.09    0.93
   4 -10 -23    3.13    0.96
   6 -10 -23    7.03    1.23
  -9  -9 -23    0.77    0.73
  -7  -9 -23    1.87    0.82
  -5  -9 -23    1.10    0.75
  -3  -9 -23    6.07    1.04
  -1  -9 -23    3.22    0.83
   1  -9 -23    0.49    0.68
   3  -9 -23    0.67    0.69
   5  -9 -23   -0.05    0.62
  15  -9 -23    1.97    0.71
 -14  -8 -23    2.74    0.87
 -12  -8 -23    0.40    0.66
 -10  -8 -23   -0.28    0.59
  -8  -8 -23    8.22    1.09
  -6  -8 -23   -0.10    0.52
  -4  -8 -23    0.05    0.54
  -2  -8 -23    5.76    0.92
   0  -8 -23   -0.29    0.56
   2  -8 -23    0.70    0.61
   4  -8 -23    2.51    0.74
  10  -8 -23    6.28    0.92
  12  -8 -23    5.08    0.87
  14  -8 -23    5.19    0.91
  16  -8 -23    0.43    0.58
  18  -8 -23    0.20    0.56
 -17  -7 -23    3.91    1.01
 -15  -7 -23    4.71    0.95
 -13  -7 -23    2.00    0.74
 -11  -7 -23    1.61    0.67
  -9  -7 -23    1.06    0.65
  -7  -7 -23    5.72    0.88
  -5  -7 -23    0.49    0.57
  -3  -7 -23    1.18    0.58
  -1  -7 -23    1.52    0.61
   1  -7 -23    2.08    0.66
   3  -7 -23    0.57    0.56
   7  -7 -23    2.85    0.64
   9  -7 -23   13.42    1.24
  11  -7 -23    4.95    0.83
  13  -7 -23   17.24    1.43
  15  -7 -23    0.84    0.55
  17  -7 -23    5.79    0.95
  19  -7 -23    0.30    0.58
  21  -7 -23    1.19    0.60
 -20  -6 -23   -0.95    0.82
 -16  -6 -23    7.59    1.09
 -14  -6 -23   -0.44    0.56
 -12  -6 -23    0.34    0.57
 -10  -6 -23    7.94    0.99
  -8  -6 -23    0.65    0.53
  -6  -6 -23    2.79    0.66
  -4  -6 -23    9.60    0.98
  -2  -6 -23    6.24    0.84
   0  -6 -23   -0.23    0.45
   2  -6 -23    1.34    0.35
   4  -6 -23   44.63    2.33
   6  -6 -23    3.63    0.64
   8  -6 -23   18.98    1.43
  10  -6 -23    3.59    0.70
  12  -6 -23    6.66    0.88
  14  -6 -23    0.36    0.46
  16  -6 -23    1.55    0.62
  18  -6 -23    0.88    0.53
  20  -6 -23    8.18    1.11
  22  -6 -23    9.93    1.22
 -21  -5 -23   -0.88    0.77
 -19  -5 -23    5.99    1.13
 -15  -5 -23    2.59    0.76
 -13  -5 -23    1.98    0.68
 -11  -5 -23   10.53    1.06
  -9  -5 -23   12.25    1.13
  -7  -5 -23   25.82    1.71
  -5  -5 -23    5.29    0.75
  -3  -5 -23    1.51    0.56
  -1  -5 -23    0.11    0.26
   1  -5 -23    9.74    0.61
   3  -5 -23    2.59    0.38
   5  -5 -23    0.43    0.43
   7  -5 -23    0.65    0.45
   9  -5 -23    1.14    0.52
  13  -5 -23    1.11    0.54
  15  -5 -23   12.55    1.22
  17  -5 -23    3.84    0.75
  19  -5 -23    5.22    0.86
  21  -5 -23   -0.02    0.45
  23  -5 -23   10.87    1.26
  25  -5 -23    1.62    0.69
 -22  -4 -23    6.73    1.21
 -20  -4 -23   12.74    1.50
 -18  -4 -23    1.05    0.77
 -16  -4 -23    6.84    1.09
 -12  -4 -23    7.17    0.89
 -10  -4 -23   21.91    1.62
  -8  -4 -23   23.68    1.62
  -6  -4 -23   34.14    2.06
  -4  -4 -23    4.06    0.40
  -2  -4 -23    0.23    0.24
   0  -4 -23    2.48    0.34
   2  -4 -23    0.62    0.28
   4  -4 -23    2.06    0.49
   6  -4 -23    0.40    0.40
   8  -4 -23   39.83    2.19
  10  -4 -23   73.77    3.69
  12  -4 -23   22.51    1.60
  14  -4 -23    1.14    0.51
  16  -4 -23   14.01    1.28
  18  -4 -23    2.21    0.63
  20  -4 -23    3.46    0.75
  22  -4 -23    4.52    0.86
  24  -4 -23   16.48    1.58
  26  -4 -23    1.44    0.67
 -23  -3 -23    1.09    0.88
 -21  -3 -23    4.68    1.01
 -19  -3 -23    3.48    0.90
 -17  -3 -23    2.62    0.83
 -15  -3 -23    2.69    0.78
 -13  -3 -23   -0.67    0.53
  -9  -3 -23   19.68    1.41
  -7  -3 -23   34.36    1.38
  -5  -3 -23    8.56    0.55
  -3  -3 -23   13.17    0.70
  -1  -3 -23    1.27    0.28
   1  -3 -23   41.83    1.52
   3  -3 -23    7.35    0.50
   5  -3 -23   29.22    1.69
   7  -3 -23   -0.03    0.35
   9  -3 -23    1.53    0.49
  11  -3 -23    9.88    0.97
  13  -3 -23   29.13    1.85
  15  -3 -23    1.88    0.60
  17  -3 -23    1.07    0.55
  19  -3 -23    2.78    0.68
  21  -3 -23    0.82    0.57
  23  -3 -23   16.32    1.47
  25  -3 -23    0.11    0.50
  27  -3 -23    5.40    0.98
  29  -3 -23    0.63    0.68
 -24  -2 -23    2.10    0.89
 -22  -2 -23   -0.36    0.66
 -20  -2 -23    0.96    0.70
 -18  -2 -23    0.81    0.66
 -16  -2 -23    6.22    0.94
 -14  -2 -23   -0.25    0.54
 -12  -2 -23    4.89    0.79
 -10  -2 -23    0.13    0.25
  -8  -2 -23    4.67    0.43
  -6  -2 -23    1.80    0.36
  -4  -2 -23    0.06    0.22
  -2  -2 -23    0.50    0.25
   0  -2 -23    0.10    0.21
   2  -2 -23   52.43    1.81
   4  -2 -23   51.88    2.41
   6  -2 -23    2.08    0.44
   8  -2 -23    0.46    0.37
  10  -2 -23    0.45    0.40
  12  -2 -23   22.23    1.48
  14  -2 -23   10.81    1.04
  16  -2 -23    8.36    0.96
  18  -2 -23   12.09    1.12
  20  -2 -23    1.28    0.54
  22  -2 -23    8.33    1.04
  24  -2 -23   10.51    1.20
  26  -2 -23    1.25    0.59
  28  -2 -23    1.39    0.65
  30  -2 -23    0.08    0.57
 -25  -1 -23   10.45    1.41
 -23  -1 -23    1.86    0.77
 -21  -1 -23   12.02    1.37
 -19  -1 -23    3.58    0.85
 -17  -1 -23    0.83    0.57
 -15  -1 -23   57.27    3.23
 -13  -1 -23    1.29    0.33
 -11  -1 -23   30.92    1.29
  -9  -1 -23    5.29    0.48
  -7  -1 -23   10.45    0.60
  -5  -1 -23    5.52    0.45
  -3  -1 -23    0.58    0.23
  -1  -1 -23    2.06    0.28
   1  -1 -23    4.86    0.58
   3  -1 -23   33.60    1.86
   5  -1 -23    1.40    0.39
   7  -1 -23    0.64    0.36
   9  -1 -23    8.85    0.87
  11  -1 -23   -0.32    0.37
  13  -1 -23  124.28    5.77
  15  -1 -23    1.96    0.56
  17  -1 -23   76.90    3.97
  19  -1 -23    7.78    0.90
  21  -1 -23    3.11    0.69
  23  -1 -23    5.24    0.86
  25  -1 -23    3.30    0.75
  27  -1 -23    0.72    0.58
 -24   0 -23    1.40    0.80
 -22   0 -23    0.97    0.71
 -20   0 -23    1.08    0.69
 -18   0 -23    0.83    0.54
 -16   0 -23    1.44    0.54
 -14   0 -23    0.66    0.49
 -12   0 -23    0.01    0.26
 -10   0 -23    0.34    0.27
  -8   0 -23    0.02    0.25
  -6   0 -23   -0.03    0.25
  -4   0 -23    0.28    0.22
  -2   0 -23    0.02    0.19
   0   0 -23    0.27    0.18
   2   0 -23    0.95    0.33
   4   0 -23    0.31    0.29
   6   0 -23    0.09    0.29
   8   0 -23   -0.45    0.28
  10   0 -23   -0.03    0.36
  12   0 -23    0.18    0.37
  14   0 -23    0.26    0.39
  16   0 -23    0.65    0.44
  18   0 -23    0.17    0.42
  20   0 -23    0.11    0.39
  22   0 -23    0.13    0.42
  24   0 -23    1.26    0.54
 -25   1 -23   11.17    1.53
 -23   1 -23    1.27    0.79
 -21   1 -23   14.95    1.49
 -19   1 -23    3.62    0.86
 -17   1 -23    0.41    0.53
 -15   1 -23   54.50    3.22
 -13   1 -23    1.14    0.57
 -11   1 -23   31.74    1.34
  -9   1 -23    6.68    0.52
  -7   1 -23    9.67    0.62
  -5   1 -23    5.84    0.47
  -3   1 -23    0.52    0.24
  -1   1 -23    1.82    0.28
   1   1 -23    7.81    0.41
   5   1 -23    2.33    0.45
   7   1 -23    0.70    0.37
   9   1 -23   10.06    0.89
  11   1 -23    0.06    0.36
  13   1 -23  117.69    5.67
  15   1 -23    2.45    0.52
  17   1 -23   77.31    3.88
  19   1 -23    5.69    0.77
  21   1 -23    3.35    0.62
  23   1 -23    8.14    0.89
 -24   2 -23    1.28    0.83
 -22   2 -23    1.06    0.74
 -20   2 -23    0.17    0.61
 -18   2 -23    2.00    0.71
 -16   2 -23    5.03    0.89
 -14   2 -23   -0.10    0.47
 -12   2 -23    4.32    0.74
 -10   2 -23    0.20    0.28
  -8   2 -23    4.57    0.48
  -6   2 -23    1.02    0.33
  -4   2 -23    0.20    0.26
  -2   2 -23    0.03    0.26
   0   2 -23    0.28    0.24
   2   2 -23   52.28    1.80
   4   2 -23   46.20    2.53
   6   2 -23    3.29    0.50
   8   2 -23    0.12    0.35
  10   2 -23   -0.05    0.34
  12   2 -23   21.65    0.95
  14   2 -23   12.02    0.66
  16   2 -23    8.80    0.59
  18   2 -23    8.28    0.60
  20   2 -23    1.14    0.48
  22   2 -23    8.04    0.89
  24   2 -23   11.47    1.08
  26   2 -23   -0.19    0.49
 -23   3 -23    0.15    0.73
 -21   3 -23    3.90    0.97
 -19   3 -23    3.31    0.85
 -17   3 -23    4.45    0.86
 -15   3 -23    2.76    0.73
 -13   3 -23   -0.36    0.43
 -11   3 -23    2.41    0.61
  -9   3 -23   19.52    1.00
  -7   3 -23   37.37    1.51
  -5   3 -23   10.62    0.67
  -3   3 -23   14.26    0.78
  -1   3 -23    1.13    0.33
   1   3 -23   40.78    1.54
   3   3 -23    7.48    0.50
   5   3 -23   31.12    1.71
   7   3 -23    0.55    0.37
   9   3 -23    1.10    0.28
  11   3 -23    8.72    0.57
  13   3 -23   28.31    1.19
  15   3 -23    1.50    0.32
  17   3 -23    0.97    0.41
  19   3 -23    3.21    0.61
  21   3 -23    1.01    0.45
  23   3 -23   13.77    1.23
  25   3 -23    0.44    0.44
  27   3 -23    3.86    0.82
 -22   4 -23    7.73    1.24
 -20   4 -23   16.39    1.60
 -18   4 -23    0.78    0.61
 -16   4 -23    9.29    1.13
 -14   4 -23    4.40    0.80
 -12   4 -23    5.86    0.88
 -10   4 -23   24.18    1.69
  -8   4 -23   25.61    1.20
  -6   4 -23   33.92    1.49
  -4   4 -23    4.09    0.47
  -2   4 -23    0.12    0.29
   0   4 -23    2.07    0.51
   2   4 -23    0.64    0.29
   4   4 -23    2.24    0.51
   6   4 -23    0.10    0.24
   8   4 -23   38.60    1.47
  10   4 -23   70.87    2.49
  12   4 -23   24.04    1.03
  14   4 -23   -0.48    0.28
  16   4 -23   15.09    1.17
  22   4 -23    4.67    0.78
  24   4 -23   18.49    1.49
  26   4 -23    0.90    0.55
  28   4 -23    7.31    1.10
 -21   5 -23    0.71    0.73
 -19   5 -23    6.45    1.09
 -17   5 -23    2.21    0.75
 -15   5 -23    1.96    0.73
 -13   5 -23    1.80    0.67
 -11   5 -23    8.38    1.04
  -9   5 -23   15.30    1.30
  -7   5 -23   25.44    1.78
  -5   5 -23    5.24    0.54
  -3   5 -23    1.72    0.38
  -1   5 -23    0.24    0.41
   1   5 -23    8.58    0.62
   3   5 -23    2.06    0.37
   5   5 -23    0.79    0.28
   7   5 -23    0.08    0.23
   9   5 -23    1.20    0.31
  11   5 -23    2.90    0.57
  17   5 -23    3.42    0.64
  19   5 -23    5.30    0.78
  21   5 -23   -0.28    0.38
 -20   6 -23    1.09    0.75
 -18   6 -23    3.67    0.99
 -16   6 -23    8.35    1.18
 -14   6 -23    0.22    0.60
 -12   6 -23   -0.67    0.47
 -10   6 -23    8.60    1.08
  -8   6 -23    0.69    0.54
  -6   6 -23    1.20    0.58
  -4   6 -23    8.71    1.02
   0   6 -23    0.30    0.29
   2   6 -23    1.26    0.26
   4   6 -23   41.17    1.62
   6   6 -23    2.78    0.38
   8   6 -23   19.75    1.38
  14   6 -23   -0.44    0.31
  16   6 -23    0.07    0.40
  18   6 -23    0.09    0.40
  20   6 -23    9.44    1.06
  22   6 -23   10.28    1.16
 -17   7 -23    4.34    1.06
 -15   7 -23    4.48    0.99
 -13   7 -23    1.34    0.70
 -11   7 -23    2.18    0.75
  -9   7 -23    2.47    0.73
  -7   7 -23    5.42    0.94
  -5   7 -23    1.33    0.63
  -3   7 -23    0.18    0.41
  -1   7 -23    1.21    0.57
   1   7 -23    1.86    0.57
   3   7 -23    0.54    0.30
   5   7 -23    0.37    0.42
   7   7 -23    0.96    0.47
  13   7 -23   15.39    1.30
  15   7 -23    1.18    0.54
  17   7 -23    5.86    0.88
  19   7 -23    0.62    0.57
 -14   8 -23    4.80    1.06
 -12   8 -23    0.32    0.65
 -10   8 -23    0.53    0.66
  -8   8 -23    6.92    1.12
  -4   8 -23   -0.10    0.47
  -2   8 -23    5.11    0.91
   0   8 -23   -0.09    0.46
   2   8 -23    0.53    0.58
   4   8 -23    0.93    0.49
   6   8 -23   15.67    1.29
   8   8 -23    0.90    0.49
  12   8 -23    5.01    0.85
  14   8 -23    3.50    0.77
  16   8 -23   -0.45    0.37
  -7   9 -23    1.87    0.68
  -5   9 -23    0.59    0.58
  -3   9 -23    4.35    0.93
  -1   9 -23    1.32    0.67
   1   9 -23    1.04    0.57
   9   9 -23    1.67    0.62
  13   9 -23    0.26    0.51
  -2  10 -23    0.15    0.59
  -2 -10 -22    0.09    0.72
   0 -10 -22   -0.23    0.69
   2 -10 -22    0.22    0.77
   4 -10 -22    0.20    0.72
   6 -10 -22    3.01    0.97
  -9  -9 -22   -0.59    0.59
  -7  -9 -22   -1.03    0.57
  -5  -9 -22    0.21    0.60
  -3  -9 -22    5.34    1.01
  -1  -9 -22    2.19    0.77
   1  -9 -22    9.31    1.26
   3  -9 -22    2.33    0.81
   5  -9 -22    5.04    0.99
  13  -9 -22    2.27    0.73
  15  -9 -22    0.80    0.59
 -14  -8 -22    0.31    0.65
 -12  -8 -22    3.28    0.90
 -10  -8 -22    0.22    0.63
  -8  -8 -22   -0.01    0.57
  -6  -8 -22    0.37    0.57
  -4  -8 -22    2.49    0.76
  -2  -8 -22    1.06    0.65
   0  -8 -22   16.46    1.47
   2  -8 -22    3.19    0.79
   4  -8 -22    1.11    0.67
  10  -8 -22    5.46    0.88
  12  -8 -22    0.51    0.54
  14  -8 -22    1.62    0.63
  16  -8 -22    0.57    0.54
  18  -8 -22    2.95    0.83
 -17  -7 -22    0.57    0.70
 -15  -7 -22   -0.24    0.60
 -13  -7 -22    5.40    0.93
 -11  -7 -22   10.55    1.20
  -9  -7 -22    2.80    0.72
  -7  -7 -22    0.90    0.62
  -5  -7 -22    0.31    0.52
  -3  -7 -22    4.71    0.82
  -1  -7 -22    2.45    0.68
   1  -7 -22   13.12    1.22
   3  -7 -22    1.55    0.61
   5  -7 -22    9.95    0.97
   7  -7 -22   11.76    1.12
   9  -7 -22    0.42    0.47
  11  -7 -22   11.25    1.11
  13  -7 -22    3.47    0.77
  15  -7 -22    0.07    0.49
  17  -7 -22    4.18    0.85
  19  -7 -22   12.26    1.34
  21  -7 -22    7.18    1.07
 -20  -6 -22    1.55    0.99
 -16  -6 -22    0.81    0.70
 -14  -6 -22    0.36    0.58
 -12  -6 -22   16.03    1.41
 -10  -6 -22    3.84    0.79
  -8  -6 -22   12.55    1.14
  -6  -6 -22   -0.15    0.44
  -4  -6 -22    3.14    0.65
  -2  -6 -22    7.43    0.88
   0  -6 -22    6.30    0.80
   2  -6 -22   32.21    1.34
   4  -6 -22    6.67    0.78
   6  -6 -22    2.27    0.57
   8  -6 -22   11.60    1.08
  10  -6 -22    6.96    0.89
  12  -6 -22    5.33    0.82
  14  -6 -22    2.50    0.68
  16  -6 -22    2.89    0.74
  18  -6 -22   -0.33    0.42
  20  -6 -22    1.86    0.64
  22  -6 -22    0.87    0.59
 -21  -5 -22    0.39    0.86
 -19  -5 -22    4.58    1.08
 -15  -5 -22    0.24    0.59
 -13  -5 -22    8.19    1.01
 -11  -5 -22    0.23    0.51
  -9  -5 -22   11.33    1.08
  -7  -5 -22    1.93    0.58
  -5  -5 -22    0.67    0.52
  -3  -5 -22    5.95    0.76
  -1  -5 -22    0.97    0.29
   1  -5 -22    0.36    0.28
   3  -5 -22    5.78    0.68
   5  -5 -22    8.19    0.84
   7  -5 -22    6.01    0.77
   9  -5 -22    3.60    0.68
  11  -5 -22   19.72    1.50
  13  -5 -22    0.71    0.49
  15  -5 -22    3.39    0.70
  17  -5 -22   11.91    1.20
  19  -5 -22    0.37    0.49
  21  -5 -22    2.32    0.72
  23  -5 -22    8.24    1.11
  25  -5 -22    2.76    0.84
 -22  -4 -22   -0.33    0.78
 -20  -4 -22    0.46    0.77
 -18  -4 -22    0.18    0.71
 -16  -4 -22    1.64    0.81
 -12  -4 -22    0.30    0.51
 -10  -4 -22   25.14    1.74
  -8  -4 -22   13.35    1.17
  -6  -4 -22   38.45    2.23
  -4  -4 -22   15.67    0.76
  -2  -4 -22    5.25    0.44
   0  -4 -22   36.31    1.42
   2  -4 -22   31.44    1.27
   4  -4 -22   41.32    2.24
   6  -4 -22   24.27    1.49
   8  -4 -22    0.42    0.45
  10  -4 -22   27.69    1.73
  12  -4 -22   12.51    1.14
  14  -4 -22    8.19    0.98
  16  -4 -22    7.99    0.97
  18  -4 -22   -0.08    0.44
  20  -4 -22   13.53    1.30
  22  -4 -22    6.15    0.96
  24  -4 -22    5.64    0.98
  26  -4 -22   18.88    1.77
 -23  -3 -22    0.93    0.84
 -21  -3 -22    3.71    0.98
 -19  -3 -22    7.18    1.14
 -17  -3 -22    0.66    0.60
 -15  -3 -22    1.64    0.73
 -13  -3 -22    0.63    0.63
  -9  -3 -22    7.44    0.88
  -7  -3 -22   49.37    1.81
  -5  -3 -22    3.71    0.36
  -3  -3 -22    9.15    0.55
  -1  -3 -22    3.11    0.35
   1  -3 -22    6.92    0.49
   3  -3 -22   16.98    0.78
   5  -3 -22    1.36    0.42
   7  -3 -22    2.81    0.55
   9  -3 -22    5.55    0.73
  11  -3 -22   11.53    1.06
  13  -3 -22    0.17    0.47
  15  -3 -22    6.35    0.86
  17  -3 -22    3.07    0.67
  19  -3 -22    7.11    0.93
  21  -3 -22    3.98    0.78
  23  -3 -22    2.84    0.75
  25  -3 -22    1.20    0.62
  27  -3 -22    0.82    0.64
  29  -3 -22    1.63    0.77
 -24  -2 -22    1.30    0.80
 -22  -2 -22    1.10    0.80
 -20  -2 -22    0.33    0.69
 -18  -2 -22    6.10    0.98
 -16  -2 -22    9.82    1.08
 -14  -2 -22   25.14    1.72
 -12  -2 -22    2.10    0.67
 -10  -2 -22    4.63    0.44
  -8  -2 -22   -0.08    0.22
  -6  -2 -22   17.98    0.82
  -4  -2 -22   28.93    1.15
  -2  -2 -22   57.20    2.01
   0  -2 -22   11.22    0.59
   2  -2 -22   40.77    1.47
   4  -2 -22    2.03    0.41
   6  -2 -22   20.71    1.36
   8  -2 -22   17.43    1.24
  10  -2 -22    3.58    0.60
  12  -2 -22   14.86    1.14
  14  -2 -22    5.67    0.78
  16  -2 -22    9.26    0.98
  18  -2 -22    5.68    0.82
  20  -2 -22    2.93    0.69
  22  -2 -22    0.38    0.52
  24  -2 -22    1.32    0.64
  26  -2 -22    0.98    0.61
  28  -2 -22    0.32    0.61
  30  -2 -22    0.89    0.62
 -25  -1 -22    3.26    0.97
 -23  -1 -22    1.95    0.79
 -21  -1 -22    3.70    0.89
 -19  -1 -22    0.99    0.60
 -17  -1 -22   29.68    1.98
 -15  -1 -22   19.04    1.46
 -13  -1 -22    5.75    0.50
 -11  -1 -22   12.13    0.68
  -9  -1 -22   15.51    0.77
  -7  -1 -22   38.48    1.46
  -5  -1 -22   22.37    0.97
  -3  -1 -22    0.06    0.20
  -1  -1 -22   25.24    0.99
   1  -1 -22    0.72    0.32
   3  -1 -22    1.32    0.37
   5  -1 -22    4.66    0.57
   7  -1 -22    0.97    0.37
   9  -1 -22    8.07    0.78
  11  -1 -22    3.08    0.56
  15  -1 -22    0.27    0.41
  19  -1 -22    5.50    0.79
  21  -1 -22    3.74    0.72
  23  -1 -22    9.81    1.09
  25  -1 -22    0.98    0.56
  27  -1 -22    2.25    0.70
 -24   0 -22    2.46    0.95
 -22   0 -22   18.79    1.75
 -20   0 -22    0.70    0.69
 -18   0 -22    4.90    0.85
 -16   0 -22   51.06    2.96
 -14   0 -22   10.41    1.03
 -12   0 -22   14.08    0.79
 -10   0 -22    4.13    0.43
  -8   0 -22    0.17    0.25
  -6   0 -22    3.33    0.38
  -4   0 -22   46.95    1.70
  -2   0 -22   -0.16    0.20
   0   0 -22    0.82    0.21
   2   0 -22   11.52    0.85
   4   0 -22   10.02    0.81
   6   0 -22    5.39    0.64
   8   0 -22    0.17    0.33
  10   0 -22    2.08    0.49
  12   0 -22   60.70    3.03
  14   0 -22    1.18    0.48
  16   0 -22   54.32    2.96
  18   0 -22   14.65    1.18
  20   0 -22   10.67    1.03
  22   0 -22   19.06    1.44
  24   0 -22    6.76    0.92
 -25   1 -22    5.04    1.16
 -23   1 -22    1.62    0.84
 -21   1 -22    5.37    1.02
 -19   1 -22    0.48    0.60
 -17   1 -22   32.04    2.04
 -15   1 -22   20.16    1.52
 -13   1 -22    5.37    0.79
 -11   1 -22   12.56    0.73
  -9   1 -22   15.33    0.81
  -7   1 -22   38.90    1.50
  -5   1 -22   22.90    1.01
  -3   1 -22    0.02    0.21
  -1   1 -22   26.51    1.02
   1   1 -22    1.33    0.23
   3   1 -22    1.86    0.41
   5   1 -22    4.61    0.59
   7   1 -22    1.39    0.41
   9   1 -22    6.60    0.73
  11   1 -22    2.23    0.51
  13   1 -22    5.16    0.65
  15   1 -22    0.50    0.40
  17   1 -22   10.10    0.79
  19   1 -22    4.85    0.46
  21   1 -22    3.06    0.40
  23   1 -22   10.91    0.98
 -24   2 -22    3.02    0.94
 -22   2 -22    2.41    0.83
 -20   2 -22    0.62    0.67
 -18   2 -22    4.93    0.91
 -16   2 -22    9.30    1.11
 -14   2 -22   23.28    1.69
 -12   2 -22    2.63    0.64
 -10   2 -22    4.33    0.48
  -8   2 -22    0.10    0.26
  -6   2 -22   18.48    0.89
  -4   2 -22   28.44    1.21
  -2   2 -22   57.19    2.07
   0   2 -22   12.15    0.62
   2   2 -22   41.07    1.46
   4   2 -22    1.00    0.39
   6   2 -22   20.93    1.34
   8   2 -22   19.53    1.25
  10   2 -22    3.57    0.37
  12   2 -22   12.74    0.70
  14   2 -22    5.35    0.46
  16   2 -22    8.62    0.58
  18   2 -22    3.57    0.41
  20   2 -22    1.95    0.50
  22   2 -22   -0.14    0.31
  24   2 -22    2.02    0.57
  26   2 -22   -0.49    0.44
 -23   3 -22    0.74    0.72
 -21   3 -22    4.43    1.00
 -19   3 -22   11.00    1.26
 -17   3 -22   -0.42    0.48
 -15   3 -22    2.09    0.70
 -13   3 -22    0.05    0.47
 -11   3 -22   19.61    1.44
  -9   3 -22    8.73    0.65
  -7   3 -22   50.22    1.93
  -5   3 -22    3.63    0.43
  -3   3 -22    9.62    0.64
  -1   3 -22    2.53    0.39
   1   3 -22    8.17    0.80
   3   3 -22   15.38    0.78
   5   3 -22    0.69    0.39
   7   3 -22    4.13    0.38
   9   3 -22    5.76    0.45
  11   3 -22   11.70    0.66
  13   3 -22    1.44    0.29
  15   3 -22    5.98    0.48
  17   3 -22    2.22    0.50
  19   3 -22    7.18    0.78
  21   3 -22    1.86    0.56
  23   3 -22    1.64    0.55
  25   3 -22    0.25    0.48
  27   3 -22   -0.46    0.46
 -22   4 -22    2.12    0.81
 -20   4 -22    0.18    0.55
 -18   4 -22    0.94    0.63
 -16   4 -22    1.36    0.64
 -14   4 -22    6.34    0.92
 -12   4 -22    0.37    0.48
 -10   4 -22   28.19    1.83
  -8   4 -22   13.54    1.18
  -6   4 -22   38.50    1.62
  -4   4 -22   16.58    0.86
  -2   4 -22    6.16    0.51
   0   4 -22   37.74    2.11
   2   4 -22   33.28    1.31
   4   4 -22   41.26    1.57
   6   4 -22   23.48    1.01
   8   4 -22    1.10    0.28
  10   4 -22   25.59    1.10
  12   4 -22   11.79    0.67
  26   4 -22   21.99    1.68
  28   4 -22    0.55    0.59
 -21   5 -22    0.14    0.66
 -19   5 -22    4.31    1.00
 -17   5 -22    0.47    0.56
 -15   5 -22   -0.16    0.50
 -13   5 -22    9.49    1.09
 -11   5 -22   -0.44    0.43
  -9   5 -22   11.22    1.15
  -7   5 -22    0.67    0.52
  -5   5 -22    1.89    0.40
  -3   5 -22    5.14    0.54
  -1   5 -22    0.46    0.43
   1   5 -22    0.61    0.30
   3   5 -22    5.02    0.37
   5   5 -22    7.25    0.54
   7   5 -22    4.26    0.44
   9   5 -22    2.89    0.37
  13   5 -22   -0.13    0.31
  15   5 -22    1.54    0.46
  17   5 -22   10.98    1.02
  19   5 -22    0.89    0.45
  21   5 -22    1.72    0.60
  23   5 -22    6.65    0.95
  25   5 -22    4.52    0.84
 -20   6 -22    1.01    0.77
 -18   6 -22   -0.32    0.61
 -16   6 -22    3.15    0.84
 -14   6 -22    1.36    0.61
 -12   6 -22   16.02    1.51
 -10   6 -22    3.74    0.82
  -8   6 -22   10.22    1.15
  -6   6 -22   -0.35    0.39
  -4   6 -22    2.78    0.68
   0   6 -22    3.21    0.46
   2   6 -22   31.89    1.10
   4   6 -22    6.52    0.52
   6   6 -22    1.68    0.32
   8   6 -22   10.19    0.94
  12   6 -22    5.24    0.72
  14   6 -22    2.07    0.55
  16   6 -22    2.97    0.63
  18   6 -22    0.76    0.47
  20   6 -22    0.76    0.50
  22   6 -22    0.77    0.53
 -17   7 -22    0.29    0.67
 -15   7 -22    0.33    0.61
 -13   7 -22    6.02    1.04
 -11   7 -22   11.64    1.30
  -9   7 -22    2.74    0.79
  -7   7 -22    0.37    0.58
  -5   7 -22   -0.05    0.49
  -3   7 -22    5.35    0.84
  -1   7 -22    2.10    0.66
   1   7 -22   13.62    1.23
   3   7 -22    0.08    0.27
   5   7 -22    6.93    0.83
   7   7 -22   11.27    1.02
  11   7 -22    9.50    0.95
  13   7 -22    2.09    0.58
  15   7 -22    0.40    0.46
  17   7 -22    4.91    0.81
  19   7 -22   10.96    1.19
  21   7 -22    7.33    1.04
 -14   8 -22    0.39    0.69
 -12   8 -22    4.79    1.01
 -10   8 -22    0.42    0.65
  -8   8 -22    0.07    0.58
  -4   8 -22    4.22    0.84
  -2   8 -22    2.18    0.71
   0   8 -22   15.08    1.40
   2   8 -22    1.97    0.65
   4   8 -22    0.02    0.38
   6   8 -22    0.54    0.44
  10   8 -22    2.84    0.67
  12   8 -22    0.92    0.49
  14   8 -22    1.37    0.59
  16   8 -22    0.55    0.52
  -7   9 -22    0.68    0.62
  -5   9 -22   -0.11    0.54
  -3   9 -22    5.92    1.01
  -1   9 -22   -0.03    0.50
   1   9 -22    9.95    1.20
   7   9 -22   -0.24    0.43
  11   9 -22    3.73    0.79
  13   9 -22    1.14    0.63
  -2  10 -22    0.47    0.62
  -2 -10 -21    0.63    0.79
   0 -10 -21   -0.51    0.71
   2 -10 -21   -0.48    0.71
   4 -10 -21    1.93    0.87
   6 -10 -21   12.37    1.51
  -9  -9 -21   -0.63    0.62
  -7  -9 -21    3.20    0.87
  -5  -9 -21    3.51    0.89
  -3  -9 -21    5.81    1.05
  -1  -9 -21   -0.26    0.62
   1  -9 -21    0.39    0.63
   3  -9 -21   11.60    1.33
  13  -9 -21    3.53    0.83
  15  -9 -21    2.44    0.74
 -14  -8 -21    8.55    1.18
 -12  -8 -21   -0.40    0.59
 -10  -8 -21    5.45    0.95
  -8  -8 -21    0.58    0.62
  -6  -8 -21    3.77    0.82
  -4  -8 -21    2.73    0.77
  -2  -8 -21    3.07    0.78
   0  -8 -21    8.72    1.10
   2  -8 -21    3.05    0.76
  10  -8 -21    6.28    0.91
  12  -8 -21    4.34    0.82
  14  -8 -21    0.10    0.50
  16  -8 -21    3.64    0.83
  18  -8 -21    1.03    0.67
 -17  -7 -21    2.87    0.93
 -15  -7 -21    3.53    0.90
 -13  -7 -21    0.14    0.55
 -11  -7 -21    1.71    0.71
  -9  -7 -21    0.87    0.59
  -7  -7 -21    0.78    0.59
  -5  -7 -21    4.74    0.82
  -3  -7 -21    0.86    0.54
  -1  -7 -21    5.02    0.82
   1  -7 -21    0.64    0.53
   3  -7 -21    0.19    0.50
   5  -7 -21    1.98    0.58
   7  -7 -21    0.89    0.50
   9  -7 -21    1.43    0.56
  11  -7 -21    0.60    0.48
  13  -7 -21    1.06    0.55
  15  -7 -21    0.33    0.49
  17  -7 -21    4.25    0.83
  19  -7 -21    1.34    0.62
  21  -7 -21    1.02    0.62
 -20  -6 -21    1.19    0.98
 -18  -6 -21    1.70    0.82
 -16  -6 -21   10.02    1.20
 -14  -6 -21    0.91    0.62
 -12  -6 -21    1.69    0.64
 -10  -6 -21    0.50    0.59
  -8  -6 -21    4.73    0.79
  -6  -6 -21    5.84    0.85
  -4  -6 -21    0.23    0.49
  -2  -6 -21    0.41    0.47
   0  -6 -21    1.09    0.55
   2  -6 -21    7.02    0.56
   4  -6 -21   31.02    1.80
   6  -6 -21    2.23    0.57
   8  -6 -21    5.64    0.81
  10  -6 -21   14.71    1.25
  12  -6 -21    0.63    0.49
  14  -6 -21    8.39    1.03
  16  -6 -21   -0.09    0.44
  18  -6 -21    3.16    0.75
  20  -6 -21    1.66    0.64
  22  -6 -21   12.07    1.38
 -21  -5 -21    5.04    1.17
 -19  -5 -21   -0.11    0.75
 -15  -5 -21    1.32    0.66
 -13  -5 -21    0.62    0.57
 -11  -5 -21    0.05    0.50
  -9  -5 -21    0.07    0.48
  -7  -5 -21    4.64    0.73
  -5  -5 -21    9.07    0.95
  -3  -5 -21    1.05    0.55
  -1  -5 -21    3.51    0.39
   1  -5 -21    9.01    0.59
   3  -5 -21    0.27    0.35
   5  -5 -21    0.03    0.40
   7  -5 -21   11.36    1.01
   9  -5 -21    9.57    0.99
  11  -5 -21    8.28    0.97
  13  -5 -21    2.86    0.64
  15  -5 -21    0.79    0.52
  17  -5 -21    0.90    0.50
  19  -5 -21    0.11    0.49
  21  -5 -21    0.31    0.53
  23  -5 -21    4.69    0.90
  25  -5 -21    0.80    0.58
 -22  -4 -21    0.80    0.87
 -20  -4 -21    1.42    0.77
 -18  -4 -21    2.64    0.89
 -16  -4 -21    0.69    0.64
 -14  -4 -21   -0.04    0.52
 -12  -4 -21   24.22    1.77
 -10  -4 -21    0.26    0.49
  -8  -4 -21    3.51    0.64
  -6  -4 -21   14.25    1.22
  -4  -4 -21   -0.19    0.19
  -2  -4 -21   10.88    0.62
   0  -4 -21    2.57    0.34
   2  -4 -21    1.23    0.31
   4  -4 -21    7.24    0.72
   6  -4 -21    8.86    0.89
   8  -4 -21    3.27    0.64
  10  -4 -21   -0.32    0.42
  12  -4 -21    8.56    0.95
  14  -4 -21    9.76    1.01
  16  -4 -21   13.47    1.23
  18  -4 -21    2.81    0.70
  20  -4 -21   10.99    1.18
  22  -4 -21    0.54    0.53
  24  -4 -21    0.43    0.57
  26  -4 -21    3.59    0.88
 -23  -3 -21    9.02    1.32
 -21  -3 -21   -0.01    0.61
 -19  -3 -21    1.66    0.75
 -17  -3 -21    5.11    0.94
 -15  -3 -21   19.21    1.50
 -13  -3 -21    0.36    0.63
 -11  -3 -21    7.45    0.90
  -9  -3 -21    9.14    0.97
  -7  -3 -21   22.30    0.95
  -5  -3 -21    0.55    0.22
  -3  -3 -21   16.94    0.80
  -1  -3 -21   15.25    0.74
   1  -3 -21    1.42    0.30
   3  -3 -21   43.85    2.29
   5  -3 -21   34.60    1.93
   7  -3 -21    5.80    0.71
   9  -3 -21   87.75    4.34
  11  -3 -21   29.90    1.87
  13  -3 -21   12.56    1.15
  15  -3 -21    1.50    0.57
  17  -3 -21   19.67    1.58
  19  -3 -21   17.32    1.42
  21  -3 -21    1.41    0.59
  23  -3 -21    1.95    0.66
  25  -3 -21    1.08    0.63
  27  -3 -21    2.77    0.80
  29  -3 -21    4.57    0.98
 -24  -2 -21    4.10    1.01
 -22  -2 -21    6.24    1.11
 -20  -2 -21   -0.43    0.60
 -18  -2 -21   10.54    1.17
 -16  -2 -21    0.38    0.57
 -14  -2 -21   -0.13    0.56
 -12  -2 -21   -0.06    0.58
 -10  -2 -21   14.99    0.75
  -8  -2 -21    1.69    0.36
  -6  -2 -21    5.64    0.43
  -4  -2 -21   40.88    1.50
  -2  -2 -21   45.26    1.60
   0  -2 -21   17.03    0.75
   2  -2 -21    4.61    0.36
   4  -2 -21   62.22    2.98
   6  -2 -21   27.61    1.65
   8  -2 -21   17.91    1.18
  10  -2 -21    9.01    0.92
  12  -2 -21    1.38    0.50
  14  -2 -21    0.66    0.48
  16  -2 -21    5.73    0.81
  18  -2 -21    0.04    0.45
  20  -2 -21    1.69    0.64
  22  -2 -21    0.33    0.52
  24  -2 -21    3.56    0.80
  26  -2 -21    1.17    0.66
  28  -2 -21    1.19    0.65
  30  -2 -21    0.76    0.63
 -25  -1 -21    0.49    0.72
 -23  -1 -21    4.46    0.98
 -21  -1 -21    2.70    0.81
 -19  -1 -21    0.24    0.58
 -17  -1 -21   47.66    3.00
 -15  -1 -21   -0.50    0.51
 -13  -1 -21   27.12    1.20
 -11  -1 -21   85.22    2.97
  -9  -1 -21    8.43    0.55
  -7  -1 -21   93.11    3.21
  -5  -1 -21    4.76    0.40
  -3  -1 -21    7.46    0.46
  -1  -1 -21    4.54    0.51
   1  -1 -21    0.54    0.18
   3  -1 -21    0.50    0.30
   5  -1 -21    1.15    0.36
   7  -1 -21   -0.08    0.30
   9  -1 -21   10.57    0.89
  11  -1 -21    0.63    0.41
  13  -1 -21    5.37    0.72
  15  -1 -21    0.01    0.41
  17  -1 -21   13.20    1.17
  19  -1 -21    6.49    0.86
  21  -1 -21    0.08    0.43
  23  -1 -21    6.13    0.86
  25  -1 -21    3.01    0.72
  27  -1 -21    0.42    0.51
 -26   0 -21   -0.31    0.70
 -24   0 -21    1.14    0.78
 -22   0 -21    0.50    0.70
 -20   0 -21    0.25    0.58
 -18   0 -21    0.95    0.57
 -16   0 -21    0.60    0.46
 -14   0 -21   -0.44    0.47
 -12   0 -21    0.33    0.27
 -10   0 -21   -0.03    0.24
  -8   0 -21    0.04    0.24
  -6   0 -21    0.04    0.23
  -4   0 -21    0.66    0.23
  -2   0 -21    1.28    0.23
   0   0 -21    0.06    0.16
   2   0 -21    0.35    0.29
   4   0 -21    0.13    0.26
   6   0 -21    0.23    0.31
   8   0 -21   -0.24    0.31
  10   0 -21   -0.03    0.35
  12   0 -21    0.32    0.39
  14   0 -21    0.06    0.39
  16   0 -21    0.03    0.39
  18   0 -21    0.42    0.44
  20   0 -21    0.56    0.44
  22   0 -21    0.77    0.48
  24   0 -21    0.44    0.49
 -25   1 -21    1.51    0.88
 -23   1 -21    4.22    1.03
 -21   1 -21    2.50    0.83
 -19   1 -21    0.58    0.64
 -17   1 -21   53.14    3.05
 -15   1 -21    0.14    0.52
 -13   1 -21   26.90    1.82
 -11   1 -21   84.27    3.00
  -9   1 -21    7.28    0.54
  -7   1 -21   94.13    3.25
  -5   1 -21    4.84    0.43
  -3   1 -21    6.26    0.45
  -1   1 -21    5.05    0.37
   1   1 -21    0.85    0.20
   3   1 -21    0.16    0.30
   5   1 -21    1.40    0.40
   7   1 -21   -0.18    0.32
   9   1 -21   10.79    0.87
  11   1 -21   -0.05    0.36
  13   1 -21    5.55    0.69
  15   1 -21    0.83    0.27
  17   1 -21   12.88    0.73
  19   1 -21    6.92    0.52
  21   1 -21    0.09    0.25
  23   1 -21    4.83    0.69
 -24   2 -21    2.00    0.88
 -22   2 -21    8.71    1.23
 -20   2 -21   -0.01    0.55
 -18   2 -21    9.62    1.17
 -16   2 -21    0.57    0.54
 -14   2 -21    1.03    0.55
 -12   2 -21   -0.12    0.47
 -10   2 -21   14.00    0.81
  -8   2 -21    1.07    0.31
  -6   2 -21    5.63    0.48
  -4   2 -21   41.22    1.58
  -2   2 -21   43.20    1.65
   0   2 -21   17.54    0.78
   2   2 -21    5.70    0.38
   4   2 -21   55.51    2.96
   6   2 -21   28.35    1.64
   8   2 -21   16.59    1.13
  10   2 -21   11.04    0.61
  12   2 -21    1.14    0.28
  14   2 -21    0.97    0.27
  16   2 -21    4.92    0.45
  18   2 -21    0.11    0.23
  20   2 -21    2.31    0.52
  22   2 -21   -0.08    0.36
  24   2 -21    3.34    0.65
  26   2 -21    0.30    0.48
 -23   3 -21    6.19    1.16
 -21   3 -21    0.13    0.65
 -19   3 -21    3.00    0.76
 -17   3 -21    5.94    0.91
 -15   3 -21   18.28    1.48
 -13   3 -21    0.15    0.45
 -11   3 -21    6.98    0.90
  -9   3 -21   12.36    0.74
  -7   3 -21   22.52    1.06
  -5   3 -21    0.61    0.30
  -3   3 -21   18.13    0.90
  -1   3 -21   15.19    0.80
   1   3 -21    2.60    0.51
   3   3 -21   44.19    1.62
   5   3 -21   36.31    1.96
   7   3 -21    7.12    0.48
   9   3 -21   89.99    2.97
  11   3 -21   29.98    1.22
  13   3 -21   12.74    0.70
  15   3 -21    1.32    0.29
  23   3 -21    1.46    0.55
  25   3 -21    0.74    0.48
  27   3 -21    1.03    0.61
 -22   4 -21    0.70    0.74
 -20   4 -21    0.54    0.64
 -18   4 -21    4.61    0.92
 -16   4 -21    0.57    0.59
 -14   4 -21    1.37    0.56
 -12   4 -21   26.33    1.83
 -10   4 -21   -0.41    0.39
  -8   4 -21    3.02    0.63
  -6   4 -21   14.24    0.85
  -4   4 -21   -0.39    0.25
  -2   4 -21   10.95    0.69
   0   4 -21    2.73    0.56
   2   4 -21    0.78    0.30
   4   4 -21    6.51    0.49
   6   4 -21   10.17    0.60
   8   4 -21    3.76    0.41
  10   4 -21   -0.15    0.21
  12   4 -21    9.40    0.79
  14   4 -21    8.83    0.84
  16   4 -21   13.64    1.04
  18   4 -21    2.72    0.54
  20   4 -21   12.26    1.05
  22   4 -21    0.60    0.44
  28   4 -21    1.19    0.63
 -21   5 -21    6.26    1.15
 -19   5 -21    0.52    0.64
 -17   5 -21    5.45    0.98
 -15   5 -21    1.53    0.62
 -13   5 -21    0.68    0.57
 -11   5 -21   -0.21    0.47
  -9   5 -21    0.23    0.46
  -7   5 -21    4.56    0.75
  -5   5 -21   10.16    1.01
  -3   5 -21    0.98    0.36
  -1   5 -21    3.21    0.59
   1   5 -21    8.73    0.61
   3   5 -21    0.00    0.19
   5   5 -21    0.10    0.21
   7   5 -21    9.61    0.60
   9   5 -21    9.95    0.84
  11   5 -21   10.04    0.88
  13   5 -21    1.86    0.48
  15   5 -21    0.83    0.41
  17   5 -21   -0.24    0.30
  19   5 -21    0.06    0.40
  21   5 -21    0.10    0.40
  23   5 -21    5.77    0.85
  25   5 -21    0.04    0.50
 -20   6 -21    2.24    0.91
 -18   6 -21    1.89    0.81
 -16   6 -21   11.52    1.35
 -14   6 -21    0.82    0.62
 -12   6 -21    2.53    0.77
 -10   6 -21    2.75    0.69
  -8   6 -21    5.74    0.87
  -6   6 -21    9.39    1.03
  -4   6 -21    0.23    0.49
   0   6 -21    0.36    0.31
   2   6 -21    6.79    0.45
   4   6 -21   28.52    1.23
   6   6 -21    1.40    0.30
  10   6 -21   15.50    1.13
  12   6 -21    1.59    0.48
  14   6 -21    7.77    0.88
  16   6 -21    0.20    0.40
  18   6 -21    3.24    0.69
  20   6 -21    1.47    0.59
  22   6 -21   17.88    1.44
  24   6 -21    0.58    0.54
 -17   7 -21    1.63    0.84
 -15   7 -21    3.00    0.88
 -13   7 -21   -0.06    0.60
 -11   7 -21    2.90    0.76
  -9   7 -21    1.32    0.69
  -7   7 -21    0.06    0.51
  -5   7 -21    4.59    0.86
  -3   7 -21    0.53    0.53
  -1   7 -21    3.65    0.75
   1   7 -21    0.27    0.28
   3   7 -21    0.39    0.27
   5   7 -21    2.02    0.47
   9   7 -21    0.61    0.43
  11   7 -21    0.55    0.40
  13   7 -21    0.26    0.43
  15   7 -21    0.27    0.43
  17   7 -21    2.53    0.65
  19   7 -21    1.29    0.58
  21   7 -21    0.87    0.61
 -14   8 -21    7.76    1.21
 -12   8 -21   -0.40    0.50
 -10   8 -21    3.54    0.94
  -8   8 -21    0.22    0.62
  -4   8 -21    1.60    0.61
  -2   8 -21    3.15    0.74
   0   8 -21    6.28    0.97
   2   8 -21    2.85    0.70
   4   8 -21   22.93    1.53
   8   8 -21    3.44    0.67
  10   8 -21    5.38    0.78
  12   8 -21    4.38    0.78
  14   8 -21    0.60    0.50
  16   8 -21    5.23    0.86
  18   8 -21    0.51    0.56
 -11   9 -21    1.80    0.87
  -7   9 -21    2.46    0.80
  -5   9 -21    4.68    0.97
  -3   9 -21    8.14    1.12
  -1   9 -21    0.13    0.52
   1   9 -21    0.30    0.52
   9   9 -21    9.10    1.03
  11   9 -21   -0.37    0.48
  13   9 -21    4.04    0.85
  -4  10 -21    2.22    0.76
  -2  10 -21    0.68    0.65
   0  10 -21    0.41    0.56
  -2 -10 -20    1.68    0.84
   0 -10 -20    0.14    0.70
   2 -10 -20    0.07    0.71
   4 -10 -20    3.06    0.96
 -11  -9 -20    1.05    0.80
  -9  -9 -20    0.49    0.72
  -7  -9 -20   11.23    1.28
  -5  -9 -20    5.51    1.03
  -3  -9 -20    5.23    1.00
  -1  -9 -20    1.29    0.73
   1  -9 -20    8.85    1.16
   3  -9 -20    1.20    0.70
  13  -9 -20    0.04    0.55
  15  -9 -20    0.82    0.61
 -14  -8 -20    1.91    0.79
 -12  -8 -20    4.97    1.00
 -10  -8 -20   -0.31    0.56
  -8  -8 -20    1.52    0.76
  -6  -8 -20    5.63    0.94
  -4  -8 -20   -0.06    0.57
  -2  -8 -20    1.24    0.66
   0  -8 -20    1.85    0.72
   2  -8 -20   -0.03    0.56
  10  -8 -20    1.57    0.61
  12  -8 -20    1.71    0.61
  14  -8 -20    6.27    0.97
  16  -8 -20    1.62    0.66
  18  -8 -20    1.43    0.68
 -17  -7 -20    4.04    0.98
 -15  -7 -20    0.85    0.70
 -13  -7 -20    1.37    0.69
 -11  -7 -20    0.15    0.58
  -9  -7 -20    1.09    0.59
  -7  -7 -20   -0.29    0.48
  -5  -7 -20    3.89    0.79
  -3  -7 -20    3.45    0.73
  -1  -7 -20   10.61    1.15
   1  -7 -20   -0.02    0.48
   5  -7 -20    1.75    0.53
   7  -7 -20    2.81    0.64
   9  -7 -20    1.23    0.55
  11  -7 -20    5.91    0.86
  13  -7 -20    7.87    1.01
  15  -7 -20    0.18    0.45
  17  -7 -20   12.00    1.27
  19  -7 -20   -0.16    0.48
  21  -7 -20   10.40    1.26
 -18  -6 -20    1.45    0.79
 -16  -6 -20   16.51    1.56
 -14  -6 -20    2.41    0.75
 -12  -6 -20    2.51    0.72
 -10  -6 -20   10.89    1.12
  -8  -6 -20    3.88    0.73
  -6  -6 -20    0.95    0.53
  -4  -6 -20   24.81    1.70
  -2  -6 -20    0.42    0.51
   0  -6 -20   18.02    1.41
   2  -6 -20    0.22    0.29
   4  -6 -20   -0.40    0.36
   6  -6 -20    3.76    0.65
   8  -6 -20    0.52    0.46
  10  -6 -20    1.99    0.60
  12  -6 -20    0.81    0.52
  14  -6 -20    1.79    0.61
  16  -6 -20    0.11    0.47
  18  -6 -20    3.39    0.79
  20  -6 -20    6.81    1.03
  22  -6 -20    2.23    0.71
 -21  -5 -20   -0.47    0.69
 -19  -5 -20    2.07    0.87
 -15  -5 -20   -0.27    0.52
 -13  -5 -20    4.32    0.79
 -11  -5 -20    1.72    0.59
  -9  -5 -20   35.03    2.15
  -7  -5 -20   10.92    1.00
  -5  -5 -20    4.87    0.75
  -3  -5 -20    2.01    0.59
  -1  -5 -20   -0.07    0.22
   1  -5 -20   19.24    0.92
   3  -5 -20   69.68    3.57
   5  -5 -20   13.26    1.03
   7  -5 -20   32.84    1.95
   9  -5 -20    1.49    0.56
  11  -5 -20    1.13    0.55
  13  -5 -20    1.31    0.54
  15  -5 -20   -0.29    0.39
  17  -5 -20    5.39    0.85
  19  -5 -20   10.18    1.15
  21  -5 -20    2.10    0.70
  23  -5 -20    0.43    0.54
  25  -5 -20   14.23    1.51
 -24  -4 -20    7.08    1.31
 -22  -4 -20    0.16    0.79
 -20  -4 -20    2.21    0.90
 -18  -4 -20   12.28    1.32
 -16  -4 -20   17.98    1.59
 -14  -4 -20   -0.03    0.51
 -12  -4 -20   -0.27    0.47
 -10  -4 -20    5.88    0.82
  -8  -4 -20    2.34    0.61
  -6  -4 -20   41.05    2.37
  -4  -4 -20    2.07    0.30
  -2  -4 -20   35.32    1.37
   0  -4 -20   -0.23    0.21
   2  -4 -20   60.45    2.17
   4  -4 -20    9.47    0.85
   6  -4 -20   25.35    1.55
   8  -4 -20    0.61    0.44
  10  -4 -20   14.95    1.20
  12  -4 -20    3.12    0.65
  14  -4 -20   11.42    1.12
  16  -4 -20    3.56    0.70
  18  -4 -20    0.20    0.48
  20  -4 -20    0.97    0.54
  22  -4 -20    8.58    1.10
  24  -4 -20    0.74    0.60
  26  -4 -20    2.45    0.79
 -25  -3 -20   13.03    1.57
 -23  -3 -20    0.82    0.76
 -21  -3 -20    4.16    0.99
 -19  -3 -20    2.69    0.84
 -17  -3 -20   -0.21    0.62
 -15  -3 -20    5.41    0.90
 -13  -3 -20    4.77    0.82
 -11  -3 -20   -0.06    0.50
  -9  -3 -20   10.40    0.99
  -7  -3 -20   21.69    0.92
  -5  -3 -20    0.23    0.21
  -3  -3 -20    5.40    0.42
  -1  -3 -20    0.16    0.21
   1  -3 -20    2.56    0.32
   3  -3 -20   28.11    1.62
   5  -3 -20    5.24    0.64
   7  -3 -20    4.92    0.66
   9  -3 -20    1.09    0.45
  11  -3 -20    3.64    0.64
  13  -3 -20   27.66    1.77
  15  -3 -20    0.10    0.47
  21  -3 -20    1.01    0.58
  23  -3 -20    7.75    1.03
  25  -3 -20    7.92    1.11
  27  -3 -20    0.28    0.57
  29  -3 -20    1.64    0.77
 -24  -2 -20    5.95    1.17
 -22  -2 -20    0.42    0.68
 -20  -2 -20    3.58    0.85
 -18  -2 -20    1.43    0.74
 -16  -2 -20    3.75    0.81
 -14  -2 -20   26.56    1.76
 -12  -2 -20   32.33    2.04
 -10  -2 -20   16.10    0.79
  -8  -2 -20   90.29    4.24
  -6  -2 -20    5.75    0.43
  -4  -2 -20    7.35    0.47
  -2  -2 -20   17.66    0.77
   0  -2 -20    0.67    0.23
   2  -2 -20    2.56    0.30
   4  -2 -20   22.85    1.34
   6  -2 -20   16.29    1.09
   8  -2 -20   19.72    1.28
  10  -2 -20    0.55    0.39
  12  -2 -20   17.97    1.33
  14  -2 -20   10.79    1.02
  16  -2 -20   36.57    2.32
  18  -2 -20    0.22    0.47
  20  -2 -20   45.50    2.68
  22  -2 -20   25.02    1.78
  24  -2 -20    9.90    1.13
  26  -2 -20   15.44    1.45
  28  -2 -20    2.49    0.80
  30  -2 -20    3.08    0.86
 -25  -1 -20   10.53    1.41
 -23  -1 -20    1.66    0.74
 -21  -1 -20    8.55    1.20
 -19  -1 -20    2.77    0.77
 -17  -1 -20   -0.87    0.48
 -15  -1 -20    5.78    0.86
 -13  -1 -20    0.52    0.30
 -11  -1 -20   45.95    1.74
  -9  -1 -20   46.96    1.69
  -7  -1 -20  237.78    7.77
  -5  -1 -20   29.75    1.21
  -3  -1 -20   52.66    1.82
  -1  -1 -20   40.04    2.06
   1  -1 -20   30.99    1.15
   3  -1 -20   17.53    1.11
   5  -1 -20    7.02    0.66
   7  -1 -20    7.08    0.70
   9  -1 -20    4.88    0.63
  11  -1 -20    0.41    0.40
  13  -1 -20   12.68    1.04
  15  -1 -20   11.38    1.02
  17  -1 -20    3.83    0.70
  19  -1 -20    6.28    0.84
  21  -1 -20    1.10    0.54
  23  -1 -20    1.07    0.55
  25  -1 -20   -0.14    0.49
  27  -1 -20    0.82    0.55
 -26   0 -20    0.36    0.76
 -24   0 -20    2.51    0.89
 -22   0 -20    1.30    0.77
 -20   0 -20    9.69    1.16
 -18   0 -20   21.90    1.68
 -16   0 -20   71.67    3.91
 -14   0 -20   14.26    1.22
 -12   0 -20    1.84    0.37
 -10   0 -20   10.05    0.62
  -8   0 -20  101.01    3.50
  -6   0 -20   44.27    1.64
  -4   0 -20   44.15    1.60
  -2   0 -20  181.00    5.90
   0   0 -20   10.15    0.47
   2   0 -20    1.26    0.34
   4   0 -20    0.07    0.28
   6   0 -20   45.37    2.31
   8   0 -20   33.77    1.91
  10   0 -20    5.81    0.66
  12   0 -20  179.29    8.37
  14   0 -20    1.39    0.48
  16   0 -20    8.32    0.87
  18   0 -20   -0.13    0.40
  20   0 -20    8.54    0.94
  22   0 -20    2.64    0.62
  24   0 -20    2.84    0.67
 -25   1 -20   12.30    1.52
 -23   1 -20    1.91    0.81
 -21   1 -20   10.97    1.30
 -19   1 -20    2.07    0.74
 -17   1 -20    0.18    0.53
 -15   1 -20    5.07    0.82
 -13   1 -20    0.91    0.54
 -11   1 -20   44.54    1.77
  -9   1 -20   41.70    1.70
  -7   1 -20  234.28    7.80
  -5   1 -20   32.58    1.26
  -3   1 -20   49.74    1.84
  -1   1 -20   40.03    1.45
   1   1 -20   33.63    1.19
   3   1 -20   18.51    1.14
   5   1 -20    6.48    0.66
   7   1 -20    7.92    0.73
   9   1 -20    6.21    0.65
  11   1 -20    0.86    0.42
  13   1 -20   11.45    0.65
  15   1 -20   11.04    0.62
  17   1 -20    2.84    0.36
  19   1 -20    4.28    0.44
  21   1 -20    0.33    0.26
  23   1 -20    0.51    0.39
 -24   2 -20    5.74    1.16
 -22   2 -20    0.85    0.73
 -20   2 -20    4.31    0.91
 -18   2 -20    0.74    0.62
 -16   2 -20    3.77    0.79
 -14   2 -20   26.30    1.73
 -12   2 -20   34.55    2.07
 -10   2 -20   15.85    0.86
  -8   2 -20   87.51    3.15
  -6   2 -20    5.94    0.51
  -4   2 -20    8.09    0.54
  -2   2 -20   17.50    0.81
   0   2 -20    0.93    0.28
   2   2 -20    3.41    0.33
   4   2 -20   22.90    1.38
   6   2 -20   15.35    1.07
   8   2 -20   18.79    0.84
  10   2 -20   -0.14    0.21
  12   2 -20   19.32    0.87
  14   2 -20   10.84    0.62
  16   2 -20   41.26    1.54
  18   2 -20   -0.08    0.22
  20   2 -20   46.52    2.50
  22   2 -20   24.76    1.63
  24   2 -20    9.68    0.99
  26   2 -20   16.03    1.35
 -25   3 -20   11.12    1.50
 -23   3 -20    0.39    0.68
 -21   3 -20    5.13    1.00
 -19   3 -20    2.99    0.85
 -17   3 -20    0.70    0.59
 -15   3 -20    5.01    0.85
 -13   3 -20    4.41    0.80
 -11   3 -20   -0.19    0.44
  -9   3 -20   10.72    0.71
  -7   3 -20   20.90    1.02
  -5   3 -20   -0.08    0.26
  -3   3 -20    5.81    0.51
  -1   3 -20    0.84    0.30
   1   3 -20    2.00    0.48
   3   3 -20   27.92    1.15
   5   3 -20    5.63    0.45
   7   3 -20    6.58    0.47
   9   3 -20    0.27    0.24
  11   3 -20    2.37    0.33
  13   3 -20   26.41    1.57
  15   3 -20    0.37    0.34
  19   3 -20    2.63    0.52
  27   3 -20    0.14    0.50
 -24   4 -20    7.65    1.31
 -22   4 -20    0.33    0.63
 -20   4 -20    1.38    0.70
 -18   4 -20   12.60    1.34
 -16   4 -20   18.65    1.57
 -14   4 -20    0.28    0.47
 -12   4 -20    0.13    0.45
 -10   4 -20    7.11    0.86
  -8   4 -20    2.92    0.64
  -6   4 -20   42.60    1.72
  -4   4 -20    2.56    0.40
  -2   4 -20   35.51    1.46
   0   4 -20    0.31    0.37
   2   4 -20   59.55    2.19
   4   4 -20   10.65    0.62
   6   4 -20   23.29    1.03
   8   4 -20    1.10    0.28
  10   4 -20   15.35    1.05
  12   4 -20    2.75    0.34
  14   4 -20    9.47    0.88
  16   4 -20    2.35    0.51
  18   4 -20    1.23    0.42
  20   4 -20    1.34    0.49
  22   4 -20    5.77    0.84
  24   4 -20    1.06    0.50
  26   4 -20    1.47    0.61
 -21   5 -20    1.10    0.70
 -19   5 -20    4.27    0.96
 -17   5 -20    0.27    0.55
 -15   5 -20    0.01    0.51
 -13   5 -20    4.89    0.86
 -11   5 -20    2.65    0.68
  -9   5 -20   33.70    2.21
  -7   5 -20    9.78    1.02
  -5   5 -20    5.71    0.77
  -3   5 -20    1.87    0.39
  -1   5 -20    0.08    0.37
   1   5 -20   20.38    0.77
   3   5 -20   71.58    2.08
   5   5 -20   12.43    0.68
   7   5 -20   33.22    1.83
   9   5 -20    1.37    0.30
  11   5 -20    0.33    0.35
  13   5 -20    0.35    0.36
  15   5 -20   -0.04    0.30
  17   5 -20    4.11    0.67
  19   5 -20   12.15    1.09
  21   5 -20    2.37    0.63
  23   5 -20    0.85    0.49
  25   5 -20   18.07    1.50
 -20   6 -20    7.40    1.27
 -18   6 -20    0.47    0.64
 -16   6 -20   20.71    1.68
 -14   6 -20    1.63    0.67
 -12   6 -20    1.58    0.65
 -10   6 -20    9.22    1.12
  -8   6 -20    5.13    0.83
  -6   6 -20   -0.07    0.40
  -4   6 -20   26.86    1.82
   0   6 -20   19.58    0.77
   2   6 -20   -0.12    0.20
   4   6 -20   -0.12    0.24
   6   6 -20    5.21    0.63
   8   6 -20   -0.17    0.29
  10   6 -20    2.94    0.56
  12   6 -20    0.93    0.43
  14   6 -20    1.85    0.52
  16   6 -20    0.36    0.40
  18   6 -20    5.01    0.78
  20   6 -20    9.38    1.02
  22   6 -20    2.09    0.61
  24   6 -20    8.67    1.09
 -17   7 -20    3.26    0.98
 -15   7 -20    2.45    0.83
 -13   7 -20    2.22    0.78
 -11   7 -20    0.31    0.54
  -9   7 -20    1.27    0.60
  -7   7 -20    0.25    0.53
  -5   7 -20    5.04    0.90
  -3   7 -20    4.39    0.78
  -1   7 -20   16.03    1.31
   1   7 -20   -0.23    0.24
   3   7 -20   22.00    1.07
   7   7 -20    2.70    0.57
   9   7 -20   -0.15    0.35
  11   7 -20    6.00    0.78
  13   7 -20    7.40    0.88
  15   7 -20    0.53    0.43
  17   7 -20   12.11    1.15
  19   7 -20   -0.08    0.42
  21   7 -20    8.83    1.09
 -14   8 -20    1.35    0.81
 -12   8 -20    5.19    1.03
 -10   8 -20   -0.47    0.55
  -8   8 -20    2.25    0.75
  -4   8 -20    0.36    0.53
  -2   8 -20    2.31    0.68
   0   8 -20    0.13    0.52
   2   8 -20    0.48    0.52
   4   8 -20    7.10    0.80
   6   8 -20   -0.10    0.38
   8   8 -20   -0.04    0.39
  10   8 -20    0.02    0.43
  12   8 -20    0.57    0.50
  14   8 -20    7.12    0.93
  16   8 -20    1.13    0.61
  18   8 -20    1.11    0.62
 -11   9 -20    0.85    0.76
  -7   9 -20    7.97    1.16
  -5   9 -20    4.53    0.92
  -3   9 -20    5.65    0.98
  -1   9 -20    0.83    0.62
   1   9 -20    7.18    1.06
   7   9 -20    1.49    0.60
   9   9 -20   -0.31    0.36
  11   9 -20    0.36    0.54
  13   9 -20    1.36    0.59
  -4  10 -20    1.93    0.79
  -2  10 -20    2.15    0.77
   0  10 -20    0.20    0.58
  -4 -10 -19    0.49    0.77
  -2 -10 -19    3.65    1.00
   0 -10 -19    5.30    1.12
   2 -10 -19    1.57    0.88
   4 -10 -19    8.98    1.34
 -11  -9 -19    3.06    0.94
  -9  -9 -19   -0.53    0.60
  -7  -9 -19    1.21    0.74
  -5  -9 -19   11.98    1.37
  -3  -9 -19   -0.67    0.54
  -1  -9 -19    4.66    0.96
   1  -9 -19    2.57    0.83
   3  -9 -19    0.33    0.61
  13  -9 -19    1.51    0.68
  15  -9 -19    4.13    0.90
 -14  -8 -19    0.35    0.64
 -12  -8 -19    6.14    1.06
 -10  -8 -19    1.79    0.74
  -8  -8 -19    0.56    0.60
  -6  -8 -19    5.56    0.95
  -4  -8 -19    1.55    0.68
  -2  -8 -19    0.13    0.57
   0  -8 -19    2.22    0.72
   2  -8 -19    0.23    0.56
   8  -8 -19    7.74    0.98
  10  -8 -19    8.12    1.02
  12  -8 -19    1.56    0.65
  14  -8 -19   10.31    1.19
  16  -8 -19    7.58    1.06
  18  -8 -19    4.76    0.95
 -17  -7 -19   -0.07    0.64
 -15  -7 -19    1.05    0.68
 -13  -7 -19   -0.29    0.55
 -11  -7 -19   -0.13    0.56
  -9  -7 -19    2.66    0.71
  -7  -7 -19    1.60    0.64
  -5  -7 -19    1.15    0.57
  -3  -7 -19    0.15    0.48
  -1  -7 -19    5.49    0.84
   1  -7 -19    0.22    0.47
   5  -7 -19   26.14    1.64
   7  -7 -19    0.16    0.45
   9  -7 -19   13.71    1.22
  11  -7 -19    0.57    0.49
  13  -7 -19    5.35    0.86
  15  -7 -19    5.09    0.87
  17  -7 -19    0.09    0.49
  19  -7 -19    1.09    0.58
  21  -7 -19    5.08    0.96
 -18  -6 -19    1.61    0.77
 -16  -6 -19    0.65    0.68
 -14  -6 -19    2.60    0.75
 -12  -6 -19   -0.35    0.49
 -10  -6 -19    2.07    0.68
  -8  -6 -19    0.04    0.46
  -6  -6 -19    0.30    0.46
  -4  -6 -19    1.48    0.59
  -2  -6 -19    5.94    0.84
   0  -6 -19    0.52    0.50
   2  -6 -19    0.36    0.39
   4  -6 -19    8.42    0.84
   6  -6 -19    5.73    0.75
   8  -6 -19    0.08    0.42
  10  -6 -19   27.58    1.77
  12  -6 -19    2.58    0.63
  14  -6 -19   -0.19    0.42
  16  -6 -19    0.43    0.50
  18  -6 -19    1.09    0.56
  20  -6 -19    2.35    0.69
  22  -6 -19    1.20    0.62
  24  -6 -19    6.37    1.07
 -21  -5 -19   -0.44    0.83
 -19  -5 -19   14.55    1.60
 -17  -5 -19    0.68    0.67
 -15  -5 -19    1.00    0.63
 -13  -5 -19    4.27    0.81
 -11  -5 -19    0.08    0.48
  -9  -5 -19    0.43    0.52
  -7  -5 -19    1.37    0.56
  -5  -5 -19    5.86    0.77
  -3  -5 -19   11.07    1.03
  -1  -5 -19    9.49    0.60
   1  -5 -19    0.14    0.26
   3  -5 -19   69.00    3.28
   5  -5 -19   -0.04    0.37
   7  -5 -19    6.38    0.80
   9  -5 -19   17.98    1.37
  11  -5 -19    4.29    0.75
  13  -5 -19    0.61    0.49
  15  -5 -19    8.28    0.98
  17  -5 -19    0.19    0.48
  19  -5 -19    0.87    0.52
  21  -5 -19    5.40    0.91
  23  -5 -19   10.50    1.25
  25  -5 -19    2.23    0.78
 -24  -4 -19    9.27    1.45
 -22  -4 -19   -0.18    0.75
 -20  -4 -19    2.61    0.93
 -18  -4 -19    4.62    0.99
 -14  -4 -19    2.18    0.66
 -12  -4 -19    2.85    0.66
 -10  -4 -19   12.58    1.13
  -8  -4 -19    7.66    0.88
  -6  -4 -19    0.40    0.49
  -4  -4 -19   21.48    0.91
  -2  -4 -19   13.31    0.70
   0  -4 -19   52.49    1.94
   2  -4 -19    5.98    0.64
   4  -4 -19   65.61    3.43
   6  -4 -19    4.12    0.63
   8  -4 -19   14.57    1.11
  10  -4 -19   -0.47    0.39
  12  -4 -19   -0.14    0.45
  14  -4 -19    0.30    0.46
  16  -4 -19    0.78    0.53
  18  -4 -19    2.52    0.67
  20  -4 -19    1.94    0.65
  22  -4 -19    2.38    0.71
  24  -4 -19   -0.02    0.51
  26  -4 -19    1.98    0.73
  28  -4 -19   12.59    1.44
 -25  -3 -19   15.44    1.70
 -23  -3 -19    0.92    0.85
 -21  -3 -19    8.08    1.18
 -19  -3 -19    0.46    0.71
 -17  -3 -19    7.70    1.03
 -15  -3 -19    8.99    1.04
 -11  -3 -19   26.73    1.72
  -9  -3 -19    6.81    0.84
  -7  -3 -19    9.82    0.56
  -5  -3 -19    1.72    0.27
  -3  -3 -19   27.27    1.11
  -1  -3 -19    8.05    0.50
   1  -3 -19   13.50    0.66
   3  -3 -19    0.45    0.31
   5  -3 -19   12.80    0.95
   7  -3 -19   53.07    2.74
   9  -3 -19   20.37    1.39
  11  -3 -19    6.96    0.84
  13  -3 -19    2.13    0.57
  15  -3 -19   30.44    1.84
  17  -3 -19    0.52    0.52
  19  -3 -19    1.76    0.58
  21  -3 -19    0.33    0.51
  23  -3 -19    4.46    0.86
  25  -3 -19   19.80    1.58
  27  -3 -19    2.00    0.72
  29  -3 -19    9.34    1.27
 -26  -2 -19    0.14    0.77
 -24  -2 -19    3.89    1.07
 -22  -2 -19    6.79    1.14
 -20  -2 -19    0.07    0.61
 -18  -2 -19    5.03    0.92
 -16  -2 -19   -0.36    0.49
 -14  -2 -19    1.09    0.64
 -12  -2 -19    6.51    0.85
 -10  -2 -19    0.17    0.23
  -8  -2 -19   44.33    2.10
  -6  -2 -19    0.84    0.24
  -4  -2 -19   13.47    0.65
  -2  -2 -19   10.12    0.53
   0  -2 -19    0.38    0.21
   2  -2 -19    8.73    0.48
   4  -2 -19   21.93    1.32
   6  -2 -19    0.45    0.32
   8  -2 -19    7.59    0.80
  10  -2 -19    5.70    0.68
  12  -2 -19    0.50    0.45
  14  -2 -19    3.70    0.67
  16  -2 -19    8.44    0.94
  18  -2 -19    0.94    0.56
  22  -2 -19    7.61    0.97
  24  -2 -19    5.31    0.87
  26  -2 -19    2.25    0.70
  28  -2 -19    3.17    0.81
  30  -2 -19    0.33    0.62
 -25  -1 -19    1.83    0.82
 -23  -1 -19    6.53    1.12
 -21  -1 -19    1.65    0.70
 -19  -1 -19    2.66    0.80
 -17  -1 -19    0.28    0.54
 -15  -1 -19    1.75    0.63
 -13  -1 -19    0.83    0.59
 -11  -1 -19    0.74    0.27
  -9  -1 -19   -0.01    0.22
  -7  -1 -19   37.57    1.36
  -5  -1 -19   16.14    0.72
  -3  -1 -19   13.70    0.63
  -1  -1 -19    0.70    0.20
   1  -1 -19   16.59    0.90
   3  -1 -19    1.99    0.21
   5  -1 -19    0.53    0.32
   7  -1 -19   24.13    1.40
   9  -1 -19  116.04    5.57
  11  -1 -19   11.61    0.95
  13  -1 -19   60.32    3.00
  15  -1 -19   20.10    1.41
  17  -1 -19    1.29    0.53
  19  -1 -19    0.23    0.46
  21  -1 -19   11.31    1.10
  23  -1 -19   24.41    1.71
  25  -1 -19    0.14    0.51
  27  -1 -19   13.97    1.35
 -26   0 -19    0.52    0.73
 -24   0 -19   -0.26    0.66
 -22   0 -19    0.81    0.76
 -20   0 -19   -0.14    0.50
 -18   0 -19    0.15    0.50
 -16   0 -19    0.70    0.55
 -14   0 -19    0.47    0.51
 -12   0 -19   -0.12    0.23
 -10   0 -19    0.14    0.26
  -8   0 -19    0.50    0.25
  -6   0 -19    0.26    0.21
  -4   0 -19    0.44    0.21
   0   0 -19    0.48    0.16
   2   0 -19    0.24    0.27
   4   0 -19    0.04    0.29
   6   0 -19   -0.15    0.29
   8   0 -19   -0.12    0.32
  10   0 -19   -0.20    0.33
  12   0 -19    0.93    0.43
  14   0 -19    0.03    0.40
  16   0 -19    0.40    0.43
  18   0 -19   -0.09    0.40
  20   0 -19    0.27    0.40
  22   0 -19    0.09    0.41
  24   0 -19    0.63    0.47
 -25   1 -19    1.90    0.87
 -23   1 -19    6.92    1.16
 -21   1 -19    1.62    0.70
 -19   1 -19    2.38    0.78
 -17   1 -19    0.71    0.56
 -15   1 -19    0.76    0.60
 -13   1 -19    0.40    0.52
 -11   1 -19    0.45    0.28
  -9   1 -19   -0.18    0.23
  -7   1 -19   34.53    1.38
  -5   1 -19   14.28    0.73
  -3   1 -19   14.45    0.67
  -1   1 -19    0.48    0.21
   1   1 -19   17.14    0.69
   3   1 -19    2.04    0.41
   5   1 -19    0.84    0.36
   7   1 -19   24.66    1.40
   9   1 -19  115.28    5.52
  11   1 -19   10.65    0.59
  13   1 -19   58.28    2.03
  15   1 -19   19.84    0.90
  17   1 -19    0.53    0.24
  19   1 -19    0.16    0.21
  21   1 -19   10.63    0.67
  23   1 -19   25.19    1.55
 -24   2 -19    2.71    0.96
 -22   2 -19    6.78    1.13
 -20   2 -19    0.15    0.56
 -18   2 -19    7.48    1.00
 -16   2 -19    0.25    0.52
 -14   2 -19    1.79    0.60
 -12   2 -19    7.16    0.85
 -10   2 -19    0.08    0.27
  -8   2 -19   39.98    1.62
  -6   2 -19    0.76    0.28
  -4   2 -19   12.99    0.69
  -2   2 -19    9.13    0.58
   0   2 -19    0.36    0.24
   2   2 -19    7.05    0.46
   4   2 -19   24.79    1.37
   6   2 -19   -0.16    0.36
   8   2 -19    9.80    0.55
  10   2 -19    4.04    0.39
  12   2 -19    0.36    0.24
  14   2 -19    5.20    0.43
  16   2 -19    7.66    0.54
  18   2 -19    1.47    0.31
  20   2 -19   13.74    1.04
  22   2 -19    5.50    0.74
  24   2 -19    4.04    0.67
  26   2 -19    0.82    0.52
 -25   3 -19   14.86    1.72
 -23   3 -19    0.87    0.81
 -21   3 -19    6.58    1.11
 -19   3 -19    1.44    0.73
 -17   3 -19    5.99    0.98
 -15   3 -19    8.84    1.06
 -13   3 -19    4.50    0.79
 -11   3 -19   24.66    1.72
  -9   3 -19    6.18    0.84
  -7   3 -19   11.38    0.69
  -5   3 -19    1.23    0.32
  -3   3 -19   27.73    1.19
  -1   3 -19    8.48    0.55
   1   3 -19   11.45    0.96
   3   3 -19   -0.30    0.23
   5   3 -19   12.58    0.66
   7   3 -19   52.94    1.88
   9   3 -19   21.08    0.92
  11   3 -19   10.01    0.79
  13   3 -19    1.73    0.29
  15   3 -19   28.15    1.58
  17   3 -19    0.29    0.32
  19   3 -19    1.54    0.44
  21   3 -19   -0.33    0.30
  23   3 -19    4.04    0.68
 -24   4 -19   12.26    1.54
 -22   4 -19   -0.12    0.66
 -20   4 -19    3.55    0.85
 -18   4 -19    5.20    0.96
 -16   4 -19    7.80    1.01
 -14   4 -19    3.89    0.75
 -12   4 -19    2.65    0.64
 -10   4 -19   12.12    1.12
  -8   4 -19    8.21    0.91
  -6   4 -19    0.28    0.28
  -4   4 -19   21.09    1.02
  -2   4 -19   14.74    0.80
   0   4 -19   54.82    2.82
   2   4 -19    6.86    0.40
   4   4 -19   70.33    2.41
   6   4 -19    4.13    0.40
   8   4 -19   12.35    0.97
  10   4 -19    0.28    0.22
  12   4 -19    1.07    0.27
  14   4 -19    0.64    0.36
  16   4 -19    1.17    0.41
  18   4 -19    2.57    0.53
  20   4 -19    1.77    0.53
  22   4 -19    3.21    0.66
  24   4 -19    0.02    0.44
  26   4 -19    1.42    0.62
  28   4 -19   12.74    1.28
 -21   5 -19    0.48    0.74
 -19   5 -19   13.64    1.51
 -17   5 -19    0.12    0.60
 -15   5 -19    1.32    0.60
 -13   5 -19    5.50    0.92
 -11   5 -19   -0.17    0.42
  -9   5 -19    0.23    0.47
  -7   5 -19    2.13    0.61
  -5   5 -19    5.97    0.78
  -3   5 -19   11.50    0.75
  -1   5 -19   11.36    0.98
   1   5 -19   -0.05    0.21
   3   5 -19   62.85    1.88
   5   5 -19    0.11    0.23
   7   5 -19    6.59    0.49
   9   5 -19   20.28    0.87
  11   5 -19    4.19    0.61
  13   5 -19    0.40    0.35
  15   5 -19    5.96    0.75
  17   5 -19    1.67    0.50
  19   5 -19   -0.38    0.32
  21   5 -19    4.08    0.73
  23   5 -19   12.29    1.14
  25   5 -19    1.19    0.57
  27   5 -19    0.12    0.54
 -20   6 -19    0.16    0.77
 -18   6 -19    1.73    0.78
 -16   6 -19    1.46    0.72
 -14   6 -19    2.34    0.77
 -12   6 -19   -0.15    0.47
 -10   6 -19    2.83    0.72
  -8   6 -19    0.74    0.50
  -6   6 -19    0.18    0.46
  -4   6 -19    1.85    0.58
   0   6 -19    1.16    0.31
   2   6 -19    0.32    0.21
   4   6 -19    6.66    0.75
   6   6 -19    5.93    0.47
   8   6 -19    0.21    0.35
  10   6 -19   24.85    1.59
  12   6 -19    2.51    0.56
  14   6 -19   -0.36    0.30
  16   6 -19    0.40    0.41
  18   6 -19    0.45    0.44
  20   6 -19    0.34    0.50
  22   6 -19    0.94    0.49
  24   6 -19    5.41    0.90
 -17   7 -19    0.84    0.73
 -15   7 -19    1.02    0.71
 -13   7 -19    0.58    0.60
 -11   7 -19    0.82    0.53
  -9   7 -19    0.88    0.61
  -7   7 -19    0.01    0.52
  -5   7 -19    0.49    0.49
  -3   7 -19    0.18    0.42
  -1   7 -19    5.06    0.83
   1   7 -19    0.51    0.27
   3   7 -19    0.31    0.25
   5   7 -19   26.38    1.55
   7   7 -19    0.42    0.40
   9   7 -19   12.15    1.06
  11   7 -19   -0.09    0.31
  13   7 -19    6.34    0.80
  15   7 -19    6.71    0.87
  17   7 -19    0.80    0.48
  19   7 -19    0.98    0.53
  21   7 -19    5.71    0.92
 -14   8 -19    0.75    0.75
 -12   8 -19    5.03    1.04
 -10   8 -19    2.46    0.80
  -8   8 -19    0.17    0.54
  -4   8 -19    2.53    0.74
  -2   8 -19   -0.60    0.44
   0   8 -19    0.50    0.51
   2   8 -19    0.23    0.50
   6   8 -19    0.36    0.40
   8   8 -19    8.79    0.93
  10   8 -19    9.14    0.97
  12   8 -19    0.10    0.45
  14   8 -19   12.63    1.19
  16   8 -19    6.67    0.95
  18   8 -19    5.49    0.89
 -11   9 -19    1.28    0.77
  -7   9 -19    0.74    0.66
  -5   9 -19   11.28    1.31
  -3   9 -19   -0.36    0.49
  -1   9 -19    2.88    0.78
   1   9 -19    2.67    0.77
   7   9 -19    1.79    0.58
   9   9 -19    2.84    0.72
  11   9 -19    1.71    0.61
  13   9 -19    0.82    0.58
  15   9 -19    5.12    0.90
  -4  10 -19    0.84    0.67
  -2  10 -19    6.22    1.09
   0  10 -19    5.03    1.02
  10  10 -19   -0.50    0.50
  -4 -10 -18    8.08    1.25
  -2 -10 -18   13.05    1.56
   0 -10 -18    0.04    0.74
   2 -10 -18   11.22    1.44
   4 -10 -18    1.20    0.86
 -11  -9 -18    0.72    0.76
  -9  -9 -18   -0.68    0.62
  -7  -9 -18    1.77    0.80
  -5  -9 -18   -0.26    0.65
  -3  -9 -18    2.19    0.80
  -1  -9 -18    3.18    0.86
   1  -9 -18    0.11    0.60
   3  -9 -18    0.93    0.71
  13  -9 -18    3.68    0.81
  15  -9 -18   12.53    1.36
 -14  -8 -18    2.09    0.84
 -12  -8 -18   -0.77    0.55
 -10  -8 -18   -0.11    0.63
  -8  -8 -18   -0.13    0.54
  -6  -8 -18    2.43    0.76
  -4  -8 -18    0.75    0.63
  -2  -8 -18    0.26    0.61
   0  -8 -18   -0.36    0.53
   2  -8 -18    5.47    0.94
   8  -8 -18    1.81    0.61
  10  -8 -18    4.89    0.82
  12  -8 -18    2.33    0.69
  14  -8 -18    3.16    0.77
  16  -8 -18    4.34    0.87
  18  -8 -18    0.40    0.56
 -17  -7 -18   13.05    1.50
 -15  -7 -18    1.50    0.72
 -13  -7 -18   13.86    1.40
 -11  -7 -18    1.54    0.71
  -9  -7 -18    5.45    0.92
  -7  -7 -18   19.20    1.53
  -5  -7 -18   -0.48    0.45
  -3  -7 -18   23.00    1.64
  -1  -7 -18    5.22    0.84
   1  -7 -18   25.94    1.73
   5  -7 -18    1.20    0.50
   7  -7 -18    5.46    0.78
   9  -7 -18    1.70    0.59
  11  -7 -18    1.92    0.63
  13  -7 -18   -0.20    0.42
  15  -7 -18    0.61    0.53
  17  -7 -18    2.79    0.74
  19  -7 -18    3.94    0.83
  21  -7 -18    5.14    0.93
 -18  -6 -18    5.60    1.01
 -16  -6 -18    9.44    1.20
 -14  -6 -18    1.74    0.68
 -12  -6 -18    3.85    0.81
 -10  -6 -18   -0.02    0.54
  -8  -6 -18   10.54    1.09
  -6  -6 -18    3.35    0.66
  -4  -6 -18    0.49    0.51
  -2  -6 -18    3.62    0.72
   0  -6 -18    3.16    0.68
   2  -6 -18    0.11    0.37
   4  -6 -18   -0.04    0.40
   6  -6 -18    1.95    0.56
   8  -6 -18    4.09    0.73
  10  -6 -18    9.70    1.04
  12  -6 -18    9.48    1.06
  14  -6 -18    7.01    0.92
  16  -6 -18    0.81    0.54
  18  -6 -18    1.97    0.65
  20  -6 -18    3.07    0.75
  22  -6 -18    0.32    0.57
  24  -6 -18    6.04    1.05
 -23  -5 -18   -0.85    0.78
 -21  -5 -18   -0.39    0.79
 -19  -5 -18   -0.04    0.79
 -17  -5 -18   -0.18    0.58
 -15  -5 -18    0.73    0.60
 -13  -5 -18    0.67    0.56
 -11  -5 -18    0.43    0.52
  -9  -5 -18    3.35    0.69
  -7  -5 -18    3.45    0.68
  -5  -5 -18    1.89    0.59
  -3  -5 -18    6.93    0.84
  -1  -5 -18    2.87    0.35
   1  -5 -18   22.32    1.00
   3  -5 -18   15.29    1.12
   5  -5 -18    1.39    0.47
   7  -5 -18   20.43    1.45
   9  -5 -18    8.68    0.92
  11  -5 -18   41.68    2.48
  13  -5 -18    0.94    0.53
  15  -5 -18    1.27    0.53
  17  -5 -18    2.24    0.66
  19  -5 -18    0.01    0.45
  21  -5 -18    0.00    0.50
  23  -5 -18    0.69    0.57
  25  -5 -18    4.40    0.96
 -24  -4 -18    0.83    0.91
 -22  -4 -18    1.07    0.84
 -20  -4 -18    8.71    1.26
 -18  -4 -18    6.87    1.11
 -14  -4 -18   10.24    1.09
 -12  -4 -18    4.02    0.75
 -10  -4 -18    5.96    0.83
  -8  -4 -18   21.07    1.52
  -6  -4 -18    3.39    0.64
  -4  -4 -18   17.00    0.77
  -2  -4 -18    5.50    0.42
   0  -4 -18    3.72    0.38
   2  -4 -18    4.71    0.55
   4  -4 -18    3.64    0.54
   6  -4 -18   83.11    4.00
   8  -4 -18    4.86    0.69
  10  -4 -18   37.31    2.18
  12  -4 -18   19.42    1.46
  14  -4 -18    0.97    0.56
  16  -4 -18   23.72    1.63
  18  -4 -18    4.83    0.81
  20  -4 -18   12.76    1.27
  22  -4 -18   19.94    1.61
  24  -4 -18   15.89    1.51
  26  -4 -18    7.14    1.10
  28  -4 -18    2.69    0.86
 -25  -3 -18    0.87    0.82
 -23  -3 -18   -0.44    0.73
 -21  -3 -18    2.78    0.92
 -19  -3 -18    2.16    0.80
 -17  -3 -18   14.60    1.43
 -15  -3 -18   -0.27    0.61
 -11  -3 -18    3.13    0.66
  -9  -3 -18    5.45    0.73
  -7  -3 -18   11.51    0.58
  -5  -3 -18    2.22    0.29
  -3  -3 -18    6.58    0.44
  -1  -3 -18    0.07    0.20
   1  -3 -18   16.06    0.74
   3  -3 -18   -0.24    0.26
   5  -3 -18    0.94    0.36
   7  -3 -18    3.29    0.56
   9  -3 -18    5.40    0.69
  11  -3 -18    3.27    0.62
  13  -3 -18   -0.28    0.42
  15  -3 -18    4.26    0.73
  17  -3 -18   -0.54    0.40
  19  -3 -18    1.44    0.57
  21  -3 -18    0.40    0.52
  23  -3 -18    0.54    0.53
  25  -3 -18    2.29    0.70
  27  -3 -18    3.39    0.85
  29  -3 -18    8.37    1.18
 -26  -2 -18    1.88    0.87
 -24  -2 -18    9.53    1.39
 -22  -2 -18    0.27    0.63
 -20  -2 -18    1.60    0.72
 -18  -2 -18    0.51    0.64
 -16  -2 -18    0.34    0.63
 -14  -2 -18   39.85    2.31
 -12  -2 -18   21.02    0.93
 -10  -2 -18   17.89    0.82
  -8  -2 -18  112.10    3.72
  -6  -2 -18   27.29    1.10
  -4  -2 -18   54.15    1.90
  -2  -2 -18   70.77    2.41
   0  -2 -18   10.24    0.54
   2  -2 -18   49.14    1.73
   4  -2 -18    5.71    0.60
   6  -2 -18    3.97    0.54
   8  -2 -18    7.85    0.73
  10  -2 -18   18.34    1.21
  14  -2 -18    0.85    0.49
  16  -2 -18   21.47    1.52
  18  -2 -18   25.52    1.72
  20  -2 -18    1.48    0.56
  22  -2 -18    6.35    0.92
  24  -2 -18    5.62    0.91
  26  -2 -18    0.68    0.57
  28  -2 -18    2.38    0.73
  30  -2 -18    0.42    0.61
 -25  -1 -18   23.31    2.07
 -23  -1 -18    0.14    0.62
 -21  -1 -18   40.17    2.64
 -19  -1 -18    6.69    1.03
 -17  -1 -18   14.98    1.29
 -15  -1 -18    3.35    0.73
 -13  -1 -18    9.47    0.97
 -11  -1 -18    3.77    0.39
  -9  -1 -18    0.35    0.24
  -7  -1 -18   46.31    1.68
  -5  -1 -18    7.96    0.47
  -3  -1 -18    5.07    0.50
  -1  -1 -18    3.78    0.29
   1  -1 -18   12.53    0.55
   3  -1 -18    6.92    0.39
   5  -1 -18    2.60    0.43
   7  -1 -18    5.49    0.63
   9  -1 -18    1.43    0.44
  11  -1 -18    1.57    0.46
  13  -1 -18   38.15    2.05
  15  -1 -18   16.16    1.19
  17  -1 -18   42.56    2.36
  19  -1 -18   13.01    1.15
  21  -1 -18   42.89    2.45
  23  -1 -18    1.44    0.54
  25  -1 -18   26.43    1.87
  27  -1 -18    0.63    0.55
 -26   0 -18    4.84    1.16
 -24   0 -18    3.59    0.95
 -22   0 -18    0.41    0.63
 -20   0 -18   -0.13    0.55
 -18   0 -18   -0.24    0.51
 -16   0 -18   13.89    1.27
 -14   0 -18   29.64    1.86
 -12   0 -18    5.38    0.77
 -10   0 -18    8.92    0.58
  -8   0 -18   35.53    1.37
  -6   0 -18    6.64    0.45
  -4   0 -18    7.77    0.48
  -2   0 -18    1.53    0.23
   0   0 -18    8.27    0.41
   2   0 -18    8.12    0.67
   4   0 -18   43.39    2.25
   6   0 -18   21.07    1.27
   8   0 -18    1.28    0.41
  10   0 -18   16.73    1.15
  12   0 -18  107.34    4.93
  14   0 -18   15.94    1.21
  16   0 -18   56.19    2.89
  18   0 -18   23.95    1.57
  20   0 -18    3.94    0.41
  22   0 -18    4.43    0.71
  24   0 -18   13.12    1.19
 -25   1 -18   27.61    2.20
 -23   1 -18    0.61    0.65
 -21   1 -18   41.92    2.66
 -19   1 -18    8.52    1.07
 -17   1 -18   15.61    1.38
 -15   1 -18    2.31    0.68
 -13   1 -18    8.18    0.95
 -11   1 -18    2.64    0.38
  -9   1 -18    0.38    0.27
  -7   1 -18   45.65    1.71
  -5   1 -18    7.59    0.50
  -3   1 -18    5.46    0.39
  -1   1 -18    4.20    0.32
   1   1 -18   13.45    0.58
   3   1 -18    7.43    0.66
   5   1 -18    1.85    0.41
   7   1 -18    5.58    0.62
   9   1 -18    1.13    0.44
  11   1 -18    0.87    0.25
  13   1 -18   34.54    1.34
  15   1 -18   14.59    0.73
  17   1 -18   39.76    1.54
  19   1 -18   11.37    0.67
  21   1 -18   41.94    1.63
  23   1 -18    0.65    0.38
 -26   2 -18    0.63    0.84
 -24   2 -18   14.76    1.58
 -22   2 -18    1.55    0.77
 -20   2 -18    0.10    0.57
 -18   2 -18    0.23    0.52
 -16   2 -18    1.03    0.58
 -14   2 -18   35.31    2.27
 -12   2 -18   19.68    1.49
 -10   2 -18   18.74    1.35
  -8   2 -18  110.86    3.82
  -6   2 -18   28.37    1.18
  -4   2 -18   54.24    1.97
  -2   2 -18   69.44    2.47
   0   2 -18   10.06    0.57
   2   2 -18   50.07    1.74
   4   2 -18    5.55    0.61
   6   2 -18    4.34    0.37
   8   2 -18    6.16    0.43
  10   2 -18   16.20    0.77
  12   2 -18   26.07    1.09
  14   2 -18    1.63    0.29
  16   2 -18   21.12    1.36
  18   2 -18   23.47    1.51
  24   2 -18    4.00    0.68
  26   2 -18   -0.14    0.42
 -25   3 -18    2.69    1.01
 -23   3 -18    1.43    0.77
 -21   3 -18    2.73    0.89
 -19   3 -18    1.07    0.63
 -17   3 -18   14.23    1.38
 -15   3 -18    0.19    0.46
 -13   3 -18   17.03    1.40
 -11   3 -18    4.00    0.70
  -9   3 -18    4.54    0.69
  -7   3 -18    9.79    0.67
  -5   3 -18    1.60    0.37
  -3   3 -18    6.57    0.52
  -1   3 -18    0.10    0.26
   1   3 -18   16.23    1.11
   3   3 -18    0.00    0.19
   5   3 -18    0.50    0.24
   7   3 -18    2.98    0.34
   9   3 -18    6.20    0.65
  11   3 -18    4.00    0.38
  13   3 -18   -0.06    0.21
  15   3 -18    4.46    0.41
  17   3 -18    0.09    0.30
  19   3 -18    0.45    0.35
  21   3 -18    0.07    0.33
  23   3 -18   -0.38    0.36
  25   3 -18    2.21    0.62
 -24   4 -18    1.52    0.88
 -22   4 -18    1.17    0.78
 -20   4 -18    7.65    1.17
 -18   4 -18    6.05    1.01
 -16   4 -18    0.45    0.57
 -14   4 -18   11.69    1.18
 -12   4 -18    2.58    0.69
 -10   4 -18    7.52    0.88
  -8   4 -18   21.39    1.56
  -6   4 -18    3.31    0.64
  -4   4 -18   15.94    0.87
  -2   4 -18    5.64    0.51
   0   4 -18    3.36    0.57
   2   4 -18    3.63    0.34
   4   4 -18    3.70    0.42
   6   4 -18   82.67    3.92
   8   4 -18    4.77    0.41
  10   4 -18   39.08    1.41
  12   4 -18   21.37    0.90
  14   4 -18    0.74    0.37
  16   4 -18   21.01    1.40
  18   4 -18    4.94    0.67
  20   4 -18   12.47    1.07
  22   4 -18   18.88    1.41
  24   4 -18   15.97    1.31
  26   4 -18    7.76    0.99
  28   4 -18    2.79    0.76
 -23   5 -18    0.81    0.75
 -21   5 -18    0.33    0.67
 -19   5 -18    0.09    0.62
 -17   5 -18    1.83    0.73
 -15   5 -18    0.19    0.50
 -13   5 -18    0.21    0.51
 -11   5 -18    0.35    0.47
  -9   5 -18    0.72    0.54
  -7   5 -18    2.58    0.63
  -5   5 -18    1.60    0.56
  -3   5 -18    7.72    0.89
  -1   5 -18    3.77    0.60
   1   5 -18   22.31    0.82
   3   5 -18   15.81    0.66
   5   5 -18    0.84    0.27
   7   5 -18   22.82    0.95
   9   5 -18    7.68    0.50
  11   5 -18   44.06    2.28
  13   5 -18    1.05    0.42
  15   5 -18   -0.12    0.30
  17   5 -18    3.04    0.60
  19   5 -18    0.67    0.42
  21   5 -18   -0.08    0.36
  23   5 -18   -0.38    0.37
  25   5 -18    7.09    0.96
  27   5 -18    1.81    0.69
 -20   6 -18    7.32    1.28
 -18   6 -18    5.16    1.07
 -16   6 -18   12.81    1.38
 -14   6 -18    2.35    0.75
 -12   6 -18    5.47    0.94
 -10   6 -18    0.12    0.43
  -8   6 -18   10.27    1.13
  -6   6 -18    1.75    0.63
  -4   6 -18   -0.41    0.40
   0   6 -18    4.32    0.42
   2   6 -18   -0.13    0.18
   4   6 -18   -0.28    0.22
   6   6 -18    1.20    0.28
   8   6 -18    2.42    0.50
  10   6 -18   11.52    0.93
  12   6 -18   10.14    0.95
  14   6 -18    8.54    0.86
  16   6 -18    0.52    0.41
  18   6 -18    2.89    0.62
  20   6 -18    3.00    0.66
  22   6 -18   -0.06    0.43
  24   6 -18    5.16    0.89
 -19   7 -18   -0.44    0.67
 -17   7 -18   19.77    1.81
 -15   7 -18    0.88    0.70
 -13   7 -18   14.00    1.49
 -11   7 -18    0.67    0.61
  -9   7 -18    7.26    1.06
  -7   7 -18   20.33    1.65
  -5   7 -18    0.67    0.55
  -3   7 -18   20.83    1.64
  -1   7 -18    4.09    0.76
   1   7 -18   23.63    1.10
   3   7 -18   11.74    1.18
   5   7 -18    1.26    0.45
   7   7 -18    5.04    0.66
   9   7 -18    1.37    0.47
  11   7 -18    1.58    0.49
  13   7 -18    0.19    0.41
  15   7 -18    1.05    0.49
  17   7 -18    0.73    0.47
  19   7 -18    2.39    0.65
  21   7 -18    1.70    0.63
 -16   8 -18    1.52    0.76
 -14   8 -18    1.95    0.85
 -12   8 -18   -0.58    0.54
 -10   8 -18    1.82    0.74
  -8   8 -18   -0.14    0.55
  -4   8 -18    2.18    0.70
  -2   8 -18    1.33    0.61
   0   8 -18   -0.23    0.44
   2   8 -18    5.61    0.90
   4   8 -18    5.19    0.70
   6   8 -18   15.11    1.21
   8   8 -18    0.48    0.42
  10   8 -18    4.64    0.76
  12   8 -18    2.28    0.61
  14   8 -18    3.43    0.72
  16   8 -18    4.42    0.84
  18   8 -18    0.35    0.47
 -11   9 -18    1.55    0.79
  -9   9 -18   -0.41    0.58
  -7   9 -18    2.33    0.79
  -5   9 -18   -0.47    0.50
  -3   9 -18    1.63    0.68
  -1   9 -18    2.26    0.75
   1   9 -18    0.34    0.54
   7   9 -18    1.17    0.56
   9   9 -18    0.15    0.47
  11   9 -18    2.23    0.67
  13   9 -18    4.98    0.85
  15   9 -18   11.27    1.24
  -4  10 -18    9.35    1.26
  -2  10 -18   15.17    1.56
   0  10 -18    1.54    0.71
  10  10 -18    1.47    0.63
  -4 -10 -17    1.13    0.80
  -2 -10 -17    3.34    1.01
   0 -10 -17    0.18    0.73
   2 -10 -17    3.43    1.00
   4 -10 -17    0.12    0.74
 -11  -9 -17    4.84    1.02
  -9  -9 -17    0.55    0.76
  -7  -9 -17    0.01    0.60
  -5  -9 -17    2.47    0.84
  -3  -9 -17    0.19    0.63
  -1  -9 -17    3.90    0.93
   1  -9 -17   11.58    1.34
   3  -9 -17    0.54    0.62
  13  -9 -17    0.22    0.56
  15  -9 -17    1.13    0.63
 -16  -8 -17    0.81    0.77
 -14  -8 -17    2.27    0.81
 -12  -8 -17    1.31    0.72
 -10  -8 -17   -0.30    0.58
  -8  -8 -17   -0.16    0.52
  -6  -8 -17    2.17    0.75
  -4  -8 -17   17.00    1.51
  -2  -8 -17    9.42    1.13
   0  -8 -17   12.96    1.30
   2  -8 -17    5.58    0.92
   8  -8 -17    0.58    0.49
  10  -8 -17    1.23    0.60
  12  -8 -17   12.10    1.26
  14  -8 -17   -0.19    0.47
  16  -8 -17    1.47    0.66
  18  -8 -17    2.27    0.77
 -19  -7 -17   -0.12    0.72
 -17  -7 -17    0.11    0.65
 -15  -7 -17   -0.34    0.53
 -13  -7 -17    1.14    0.64
 -11  -7 -17    1.37    0.70
  -9  -7 -17    3.12    0.75
  -7  -7 -17    1.34    0.60
  -5  -7 -17   -0.31    0.49
  -3  -7 -17    3.02    0.69
  -1  -7 -17    0.36    0.51
   1  -7 -17    0.51    0.54
   5  -7 -17    1.70    0.54
   7  -7 -17    5.74    0.81
   9  -7 -17    1.88    0.61
  11  -7 -17    1.70    0.61
  13  -7 -17    1.01    0.54
  15  -7 -17    0.56    0.54
  17  -7 -17    1.33    0.61
  19  -7 -17    0.52    0.57
  21  -7 -17    1.92    0.72
 -18  -6 -17    1.34    0.75
 -16  -6 -17    1.34    0.71
 -14  -6 -17    0.72    0.61
 -12  -6 -17    0.48    0.57
 -10  -6 -17    1.19    0.58
  -8  -6 -17   10.61    1.07
  -6  -6 -17   12.49    1.14
  -4  -6 -17   15.67    1.29
  -2  -6 -17    2.20    0.64
   0  -6 -17   21.40    1.54
   2  -6 -17    3.47    0.58
   4  -6 -17   52.00    2.59
   6  -6 -17   11.64    1.04
   8  -6 -17    2.94    0.65
  10  -6 -17   10.35    1.06
  12  -6 -17    6.90    0.88
  14  -6 -17    2.53    0.66
  16  -6 -17    1.49    0.61
  18  -6 -17    0.29    0.50
  20  -6 -17    1.37    0.61
  22  -6 -17    0.25    0.54
  24  -6 -17    6.64    1.08
 -23  -5 -17   -0.02    0.86
 -21  -5 -17    7.30    1.27
 -17  -5 -17   10.11    1.21
 -15  -5 -17   -0.50    0.50
 -13  -5 -17    3.85    0.78
 -11  -5 -17    1.03    0.54
  -9  -5 -17   10.58    1.05
  -7  -5 -17   39.80    2.37
  -5  -5 -17    6.32    0.80
  -3  -5 -17    0.56    0.52
  -1  -5 -17   20.51    0.96
   1  -5 -17    9.34    0.60
   3  -5 -17   22.48    1.43
   5  -5 -17    0.66    0.44
   7  -5 -17   -0.19    0.42
   9  -5 -17    0.51    0.50
  11  -5 -17    7.16    0.91
  13  -5 -17    0.00    0.46
  15  -5 -17   -0.03    0.43
  17  -5 -17    3.44    0.74
  19  -5 -17    0.45    0.52
  21  -5 -17    3.30    0.80
  23  -5 -17    4.37    0.88
  25  -5 -17    2.06    0.73
 -24  -4 -17    0.99    0.94
 -22  -4 -17    1.32    0.78
 -20  -4 -17    0.58    0.77
 -18  -4 -17    2.19    0.80
 -14  -4 -17    0.00    0.48
 -12  -4 -17    0.00    0.49
 -10  -4 -17    5.26    0.79
  -8  -4 -17    4.12    0.74
  -6  -4 -17    1.32    0.54
  -4  -4 -17   16.80    0.79
  -2  -4 -17    0.61    0.24
   0  -4 -17   18.35    0.83
   2  -4 -17    2.69    0.46
   4  -4 -17   -0.24    0.33
   6  -4 -17    1.86    0.50
   8  -4 -17   11.28    1.00
  10  -4 -17    0.81    0.49
  12  -4 -17    0.31    0.47
  14  -4 -17    3.55    0.72
  16  -4 -17    5.38    0.79
  18  -4 -17    6.88    0.91
  20  -4 -17    0.93    0.55
  22  -4 -17    1.27    0.61
  24  -4 -17    1.10    0.63
  26  -4 -17    1.06    0.69
  28  -4 -17    4.12    0.97
 -25  -3 -17    6.48    1.26
 -23  -3 -17    2.50    0.92
 -21  -3 -17    4.42    1.05
 -19  -3 -17   15.13    1.46
 -17  -3 -17    8.89    1.12
 -15  -3 -17   15.04    1.31
 -11  -3 -17   11.38    1.09
  -9  -3 -17   15.87    1.22
  -7  -3 -17   13.01    0.64
  -5  -3 -17  106.35    3.55
  -3  -3 -17   13.73    0.66
  -1  -3 -17   41.56    1.51
   1  -3 -17   16.90    0.78
   3  -3 -17   65.93    3.17
   5  -3 -17   19.37    1.21
   7  -3 -17   18.00    1.21
   9  -3 -17    1.10    0.46
  11  -3 -17   20.72    1.45
  13  -3 -17   13.47    1.18
  15  -3 -17   -0.05    0.49
  17  -3 -17    6.79    0.88
  19  -3 -17   19.55    1.49
  21  -3 -17    6.29    0.97
  23  -3 -17    1.86    0.69
  25  -3 -17    5.70    0.97
  27  -3 -17    7.63    1.11
  29  -3 -17   14.39    1.50
 -26  -2 -17    0.22    0.79
 -24  -2 -17   27.87    2.23
 -22  -2 -17    9.21    1.25
 -20  -2 -17    1.26    0.66
 -18  -2 -17   -0.08    0.56
 -16  -2 -17    9.27    1.07
 -14  -2 -17    9.60    1.04
 -12  -2 -17    0.71    0.25
 -10  -2 -17   15.15    0.72
  -8  -2 -17   42.12    1.51
  -6  -2 -17   11.00    0.55
  -4  -2 -17   44.71    1.59
  -2  -2 -17    1.30    0.24
   0  -2 -17    3.82    0.32
   2  -2 -17   51.79    1.85
   4  -2 -17    2.60    0.43
   6  -2 -17    0.19    0.31
   8  -2 -17    1.78    0.45
  10  -2 -17    6.37    0.73
  12  -2 -17    0.44    0.44
  14  -2 -17    0.97    0.48
  16  -2 -17   11.58    1.05
  18  -2 -17    2.74    0.66
  20  -2 -17   12.24    1.16
  22  -2 -17    4.75    0.82
  24  -2 -17    8.20    1.01
  26  -2 -17    2.26    0.70
  28  -2 -17    6.60    1.03
  30  -2 -17    0.73    0.65
 -25  -1 -17    5.84    1.17
 -23  -1 -17    0.59    0.70
 -21  -1 -17    6.15    1.01
 -19  -1 -17    8.21    1.09
 -17  -1 -17    1.07    0.60
 -15  -1 -17    0.17    0.60
 -13  -1 -17    6.62    0.89
 -11  -1 -17    9.61    0.59
  -9  -1 -17   28.20    1.13
  -7  -1 -17   15.74    0.75
  -5  -1 -17   45.85    1.65
  -3  -1 -17  101.87    4.60
  -1  -1 -17    1.28    0.21
   1  -1 -17   46.34    1.60
   3  -1 -17   35.55    1.27
   5  -1 -17    1.13    0.36
   9  -1 -17   66.77    3.20
  11  -1 -17    0.75    0.42
  13  -1 -17   20.39    1.40
  15  -1 -17    1.07    0.50
  19  -1 -17    4.89    0.76
  23  -1 -17    0.94    0.51
  25  -1 -17    4.01    0.79
  27  -1 -17    1.27    0.57
 -26   0 -17    0.83    0.80
 -24   0 -17    0.28    0.67
 -22   0 -17    1.43    0.68
 -20   0 -17    0.06    0.50
 -18   0 -17    0.07    0.53
 -16   0 -17    0.66    0.54
 -14   0 -17    0.49    0.50
 -12   0 -17    1.05    0.55
 -10   0 -17   -0.26    0.21
  -8   0 -17    0.79    0.24
  -6   0 -17   -0.18    0.20
  -4   0 -17    0.08    0.19
  -2   0 -17   -0.07    0.17
   0   0 -17    0.95    0.18
   2   0 -17   -0.24    0.27
   4   0 -17   -0.23    0.29
   6   0 -17    0.38    0.34
   8   0 -17   -0.06    0.33
  10   0 -17   -0.04    0.40
  12   0 -17    1.46    0.45
  14   0 -17   -0.45    0.38
  16   0 -17    0.18    0.23
  18   0 -17    0.09    0.22
  20   0 -17    0.37    0.24
  22   0 -17    0.60    0.43
  24   0 -17    0.47    0.44
 -25   1 -17    7.94    1.25
 -23   1 -17    0.78    0.73
 -21   1 -17    7.41    1.07
 -19   1 -17    6.88    0.99
 -17   1 -17    0.98    0.59
 -15   1 -17    1.14    0.62
 -13   1 -17    7.02    0.87
 -11   1 -17    9.59    0.93
  -9   1 -17   25.98    1.15
  -7   1 -17   17.80    0.81
  -5   1 -17   46.38    1.68
  -3   1 -17   95.43    3.30
  -1   1 -17    0.66    0.21
   1   1 -17   46.88    1.62
   3   1 -17   38.08    1.91
   5   1 -17    0.75    0.34
   7   1 -17   60.17    3.02
   9   1 -17   64.76    2.18
  11   1 -17    1.16    0.25
  13   1 -17   20.61    0.91
  15   1 -17    0.82    0.26
  17   1 -17    1.58    0.39
  19   1 -17    3.57    0.41
  21   1 -17    3.68    0.56
  23   1 -17    0.34    0.37
 -26   2 -17    0.51    0.75
 -24   2 -17   29.18    2.25
 -22   2 -17   12.01    1.39
 -20   2 -17    0.84    0.64
 -18   2 -17    0.59    0.59
 -16   2 -17    7.37    1.00
 -14   2 -17   11.12    1.11
 -12   2 -17    0.66    0.53
 -10   2 -17   13.45    1.17
  -8   2 -17   40.49    1.60
  -6   2 -17   10.46    0.63
  -4   2 -17   44.67    1.66
  -2   2 -17    1.71    0.29
   0   2 -17    4.45    0.37
   2   2 -17   54.92    1.86
   4   2 -17    2.78    0.45
   6   2 -17    0.17    0.21
   8   2 -17    1.99    0.29
  10   2 -17    7.78    0.48
  12   2 -17    0.18    0.39
  14   2 -17    0.42    0.22
  16   2 -17    8.50    0.55
  18   2 -17    1.74    0.31
  20   2 -17   11.43    0.92
  22   2 -17    5.71    0.70
 -25   3 -17    7.47    1.35
 -23   3 -17    2.50    0.93
 -21   3 -17    4.43    0.97
 -19   3 -17   18.72    1.61
 -17   3 -17    7.78    1.06
 -15   3 -17   15.33    1.35
 -13   3 -17   11.26    1.11
 -11   3 -17   11.77    1.10
  -9   3 -17   12.89    1.18
  -7   3 -17   12.47    0.73
  -5   3 -17  107.99    3.67
  -3   3 -17   14.68    0.77
  -1   3 -17   39.66    1.58
   1   3 -17   17.49    1.19
   3   3 -17   64.86    1.82
   5   3 -17   19.83    0.85
   7   3 -17   18.03    1.16
   9   3 -17    0.64    0.25
  11   3 -17   22.77    0.93
  13   3 -17   15.28    0.72
  15   3 -17    0.15    0.21
  17   3 -17    6.89    0.70
  19   3 -17   19.21    1.30
  21   3 -17    8.20    0.84
  23   3 -17    2.59    0.59
  25   3 -17    5.28    0.78
  27   3 -17    7.34    0.96
 -24   4 -17    0.13    0.71
 -22   4 -17    1.22    0.76
 -20   4 -17    0.02    0.56
 -18   4 -17    4.76    0.92
 -16   4 -17    1.36    0.61
 -14   4 -17    0.40    0.53
 -12   4 -17    0.00    0.42
 -10   4 -17    6.15    0.81
  -8   4 -17    4.75    0.75
  -6   4 -17    1.10    0.54
  -4   4 -17   18.71    0.92
  -2   4 -17    0.13    0.29
   0   4 -17   16.71    0.82
   2   4 -17    1.89    0.30
   4   4 -17   -0.05    0.27
   6   4 -17    2.13    0.34
   8   4 -17   10.97    0.60
  10   4 -17    1.04    0.26
  12   4 -17    0.30    0.23
  14   4 -17    4.79    0.60
  16   4 -17    4.13    0.60
  18   4 -17    4.73    0.68
  20   4 -17    0.31    0.37
  22   4 -17    0.50    0.44
  24   4 -17    0.63    0.43
  26   4 -17    0.37    0.50
  28   4 -17    3.47    0.81
 -23   5 -17    0.54    0.72
 -21   5 -17    6.43    1.18
 -19   5 -17    7.55    1.17
 -17   5 -17   10.51    1.27
 -15   5 -17   -0.19    0.46
 -13   5 -17    3.70    0.80
 -11   5 -17    0.03    0.46
  -9   5 -17    8.07    0.97
  -7   5 -17   40.31    2.44
  -5   5 -17    5.89    0.80
  -3   5 -17    1.18    0.55
  -1   5 -17   22.48    0.96
   1   5 -17    9.51    0.50
   3   5 -17   25.27    1.06
   5   5 -17    1.51    0.29
   7   5 -17   -0.07    0.21
   9   5 -17    1.14    0.38
  11   5 -17    7.64    0.75
  13   5 -17    0.34    0.34
  15   5 -17    0.42    0.36
  17   5 -17    2.55    0.58
  19   5 -17   -0.09    0.36
  21   5 -17    4.69    0.76
  23   5 -17    3.57    0.76
  25   5 -17    1.31    0.63
  27   5 -17    0.37    0.54
 -20   6 -17    5.08    1.11
 -18   6 -17    1.77    0.77
 -16   6 -17    2.31    0.77
 -14   6 -17   -0.02    0.49
 -12   6 -17   -0.09    0.49
 -10   6 -17    1.78    0.63
  -8   6 -17   10.59    1.11
  -6   6 -17   12.04    1.19
  -4   6 -17   16.76    1.38
  -2   6 -17    2.60    0.43
   0   6 -17   21.04    1.00
   2   6 -17    2.64    0.60
   4   6 -17   46.79    1.73
   6   6 -17   10.74    0.90
   8   6 -17    2.62    0.53
  10   6 -17   11.01    0.94
  12   6 -17    7.62    0.79
  14   6 -17    6.42    0.73
  16   6 -17    2.87    0.59
  18   6 -17    0.17    0.39
  20   6 -17    1.91    0.57
  22   6 -17    0.97    0.50
  24   6 -17    5.29    0.89
 -19   7 -17   -0.46    0.68
 -17   7 -17    0.35    0.67
 -15   7 -17    0.37    0.63
 -13   7 -17   -0.03    0.49
 -11   7 -17    2.83    0.80
  -9   7 -17    4.21    0.85
  -7   7 -17    1.93    0.67
  -5   7 -17    0.42    0.53
  -3   7 -17    2.79    0.69
  -1   7 -17   -0.33    0.40
   1   7 -17   -0.16    0.25
   3   7 -17    1.30    0.33
   5   7 -17    1.00    0.43
   7   7 -17    7.56    0.76
   9   7 -17    0.73    0.45
  11   7 -17    1.00    0.43
  13   7 -17    1.12    0.50
  15   7 -17    0.55    0.43
  17   7 -17    0.96    0.51
  19   7 -17    0.63    0.46
  21   7 -17    1.48    0.60
 -16   8 -17    3.40    0.96
 -14   8 -17    0.83    0.68
 -12   8 -17    2.33    0.79
 -10   8 -17    0.23    0.60
  -8   8 -17    0.18    0.59
  -4   8 -17   17.63    1.56
  -2   8 -17    8.08    1.07
   0   8 -17   11.68    1.25
   2   8 -17    4.04    0.82
   4   8 -17   17.14    1.27
   6   8 -17   13.80    1.13
   8   8 -17    0.30    0.39
  10   8 -17    2.66    0.65
  12   8 -17   13.25    1.17
  14   8 -17    1.21    0.51
  16   8 -17    1.32    0.58
  18   8 -17    3.38    0.77
 -11   9 -17    6.04    1.13
  -9   9 -17    0.21    0.69
  -7   9 -17   -0.07    0.56
  -5   9 -17    3.90    0.90
  -3   9 -17    1.16    0.62
  -1   9 -17    5.96    0.97
   1   9 -17   13.22    1.38
   7   9 -17    2.06    0.60
   9   9 -17    1.28    0.57
  11   9 -17   -0.60    0.42
  13   9 -17    0.22    0.51
  15   9 -17    1.42    0.62
  -4  10 -17    0.76    0.63
  -2  10 -17    4.55    0.98
   0  10 -17    1.24    0.68
  10  10 -17    0.88    0.60
  -4 -10 -16    2.14    0.91
  -2 -10 -16    2.06    0.93
   0 -10 -16   12.41    1.48
   2 -10 -16    2.66    0.89
   4 -10 -16    0.00    0.68
 -11  -9 -16    3.65    0.96
  -9  -9 -16    7.61    1.14
  -7  -9 -16    8.46    1.19
  -5  -9 -16    2.41    0.81
  -3  -9 -16    4.70    0.96
  -1  -9 -16    0.21    0.69
   1  -9 -16    0.30    0.62
  13  -9 -16   12.19    1.30
  15  -9 -16    0.98    0.64
 -16  -8 -16    0.84    0.74
 -14  -8 -16    1.11    0.75
 -12  -8 -16   -0.29    0.62
 -10  -8 -16    0.07    0.61
  -8  -8 -16    2.98    0.78
  -6  -8 -16   -0.11    0.56
  -4  -8 -16    4.79    0.90
  -2  -8 -16    0.60    0.61
   0  -8 -16    0.48    0.57
   8  -8 -16    8.01    0.95
  10  -8 -16    1.09    0.60
  12  -8 -16    0.42    0.51
  14  -8 -16    0.31    0.52
  16  -8 -16    1.08    0.59
  18  -8 -16    0.82    0.66
 -19  -7 -16    1.15    0.82
 -17  -7 -16    1.42    0.75
 -15  -7 -16    1.87    0.75
 -13  -7 -16    3.70    0.87
 -11  -7 -16    1.28    0.67
  -9  -7 -16    1.17    0.61
  -7  -7 -16   15.60    1.32
  -5  -7 -16    0.77    0.54
  -3  -7 -16   13.68    1.24
  -1  -7 -16   16.07    1.40
   1  -7 -16   14.30    1.27
   5  -7 -16    1.09    0.53
   7  -7 -16   37.52    2.13
   9  -7 -16    6.62    0.88
  11  -7 -16    0.57    0.55
  13  -7 -16    0.13    0.47
  15  -7 -16   -0.40    0.43
  17  -7 -16    1.04    0.59
  19  -7 -16    0.03    0.51
  21  -7 -16    0.90    0.59
 -18  -6 -16    8.13    1.18
 -16  -6 -16    0.64    0.65
 -14  -6 -16    3.99    0.82
 -12  -6 -16   -0.15    0.53
 -10  -6 -16   16.04    1.34
  -8  -6 -16   14.77    1.27
  -6  -6 -16    4.10    0.73
  -4  -6 -16    1.13    0.56
  -2  -6 -16   -0.07    0.49
   0  -6 -16    4.35    0.74
   2  -6 -16    7.28    0.79
   4  -6 -16   17.60    1.24
   6  -6 -16   27.99    1.73
   8  -6 -16   -0.11    0.47
  10  -6 -16    6.63    0.87
  12  -6 -16   14.03    1.22
  14  -6 -16    6.74    0.90
  16  -6 -16   31.69    2.08
  18  -6 -16    8.93    1.09
  20  -6 -16   16.69    1.54
  22  -6 -16    2.06    0.72
  24  -6 -16   -0.24    0.54
 -23  -5 -16    3.31    1.13
 -21  -5 -16   13.89    1.58
 -17  -5 -16   57.24    3.43
 -15  -5 -16    0.65    0.61
 -13  -5 -16   17.39    1.38
 -11  -5 -16   13.65    1.25
  -9  -5 -16    8.25    0.94
  -7  -5 -16    4.29    0.77
  -5  -5 -16    0.59    0.50
  -3  -5 -16    6.98    0.84
  -1  -5 -16   14.27    0.73
   1  -5 -16   26.06    1.43
   3  -5 -16    5.97    0.68
   5  -5 -16    1.19    0.49
   7  -5 -16    1.45    0.53
   9  -5 -16   19.42    1.43
  11  -5 -16   40.23    2.35
  13  -5 -16    0.75    0.52
  15  -5 -16    2.67    0.65
  17  -5 -16    2.51    0.65
  19  -5 -16    3.65    0.79
  21  -5 -16    0.34    0.53
  23  -5 -16    6.54    1.01
  25  -5 -16    1.03    0.66
 -24  -4 -16    0.69    0.93
 -22  -4 -16   11.55    1.41
 -20  -4 -16    8.99    1.26
 -18  -4 -16   11.81    1.31
 -14  -4 -16    0.37    0.55
 -12  -4 -16   29.72    1.88
 -10  -4 -16   -0.06    0.48
  -8  -4 -16    1.47    0.60
  -6  -4 -16   15.38    1.27
  -4  -4 -16    0.54    0.20
  -2  -4 -16    0.12    0.21
   0  -4 -16    0.53    0.23
   2  -4 -16   87.24    4.15
   4  -4 -16   80.22    3.91
   6  -4 -16   13.75    1.05
   8  -4 -16    0.68    0.45
  10  -4 -16    4.89    0.73
  12  -4 -16    7.73    0.89
  14  -4 -16   16.02    1.33
  16  -4 -16    2.91    0.69
  18  -4 -16   13.59    1.25
  20  -4 -16    4.26    0.80
  22  -4 -16    6.78    0.99
  24  -4 -16    1.15    0.66
  26  -4 -16    2.60    0.84
  28  -4 -16    0.28    0.68
 -25  -3 -16    0.23    0.86
 -23  -3 -16    2.18    0.93
 -21  -3 -16    3.83    0.97
 -19  -3 -16    0.63    0.64
 -17  -3 -16    2.41    0.75
 -15  -3 -16    1.65    0.71
 -13  -3 -16    9.18    1.01
 -11  -3 -16    5.58    0.80
  -9  -3 -16    2.42    0.59
  -7  -3 -16   -0.05    0.17
  -5  -3 -16   -0.05    0.16
  -3  -3 -16   -0.07    0.18
  -1  -3 -16    6.51    0.44
   1  -3 -16   12.07    0.61
   3  -3 -16   -0.12    0.28
   5  -3 -16    0.56    0.37
   7  -3 -16    3.92    0.57
   9  -3 -16    0.37    0.39
  11  -3 -16   34.37    1.96
  13  -3 -16    7.49    0.84
  15  -3 -16    3.23    0.70
  17  -3 -16   13.50    1.21
  19  -3 -16    0.78    0.52
  21  -3 -16   12.91    1.24
  23  -3 -16    0.72    0.60
  25  -3 -16    5.80    0.96
  27  -3 -16    0.66    0.62
  29  -3 -16    1.15    0.67
 -26  -2 -16    0.43    0.77
 -24  -2 -16    1.07    0.79
 -22  -2 -16    3.45    0.93
 -20  -2 -16    1.36    0.70
 -18  -2 -16    6.55    0.95
 -16  -2 -16    0.72    0.59
 -14  -2 -16    1.51    0.67
 -12  -2 -16    0.58    0.59
 -10  -2 -16    0.22    0.20
  -8  -2 -16   91.75    3.05
  -6  -2 -16    3.86    0.33
  -4  -2 -16    8.76    0.47
  -2  -2 -16   60.25    2.05
   0  -2 -16    1.06    0.21
   2  -2 -16    0.57    0.27
   4  -2 -16    3.62    0.49
   6  -2 -16   61.37    3.09
   8  -2 -16    3.15    0.52
  10  -2 -16   47.89    2.53
  12  -2 -16   82.70    4.16
  14  -2 -16    2.48    0.60
  16  -2 -16    5.20    0.77
  18  -2 -16    2.77    0.68
  20  -2 -16   13.19    1.21
  22  -2 -16    3.71    0.75
  24  -2 -16    1.97    0.67
  26  -2 -16    2.84    0.78
  28  -2 -16    1.51    0.66
  30  -2 -16    2.78    0.79
 -27  -1 -16    1.14    0.82
 -25  -1 -16    2.61    0.95
 -23  -1 -16    1.12    0.77
 -21  -1 -16    1.36    0.73
 -19  -1 -16    1.92    0.71
 -17  -1 -16    3.81    0.78
 -15  -1 -16    3.04    0.73
 -13  -1 -16    1.57    0.61
 -11  -1 -16    0.23    0.22
  -9  -1 -16    0.29    0.23
  -7  -1 -16    0.12    0.21
  -5  -1 -16   58.78    1.99
  -3  -1 -16   12.48    0.57
  -1  -1 -16   35.41    1.28
   1  -1 -16   20.30    0.80
   3  -1 -16   87.14    4.32
   5  -1 -16    0.06    0.30
   7  -1 -16   16.39    1.10
   9  -1 -16   13.51    1.00
  13  -1 -16   66.67    3.33
  15  -1 -16   35.97    2.08
  17  -1 -16    7.56    0.84
  19  -1 -16   31.57    1.87
  21  -1 -16    0.75    0.52
  23  -1 -16    1.20    0.54
  25  -1 -16   16.86    1.39
  27  -1 -16    1.67    0.66
 -26   0 -16    0.01    0.68
 -24   0 -16    2.11    0.91
 -22   0 -16   18.14    1.58
 -20   0 -16    3.88    0.83
 -18   0 -16    1.77    0.68
 -16   0 -16   59.25    3.35
 -14   0 -16   20.17    1.51
 -12   0 -16  141.84    6.98
 -10   0 -16    9.80    0.59
  -8   0 -16  312.80   10.18
  -6   0 -16   -0.25    0.19
  -4   0 -16   96.01    3.16
  -2   0 -16   29.64    1.52
   0   0 -16  129.70    4.16
   2   0 -16   21.02    1.21
   4   0 -16   77.10    3.77
   6   0 -16  153.10    7.03
   8   0 -16   -0.32    0.32
  10   0 -16   55.91    2.78
  12   0 -16  404.64   18.21
  14   0 -16    3.96    0.37
  16   0 -16   79.70    2.71
  18   0 -16   51.40    1.89
  20   0 -16    0.81    0.27
  22   0 -16    0.09    0.41
  24   0 -16    1.28    0.54
 -27   1 -16    3.32    1.05
 -25   1 -16    1.23    0.81
 -23   1 -16    1.27    0.77
 -21   1 -16    1.68    0.75
 -19   1 -16    2.11    0.71
 -17   1 -16    4.00    0.78
 -15   1 -16    3.63    0.73
 -13   1 -16    2.21    0.62
 -11   1 -16    0.62    0.47
  -9   1 -16    0.60    0.27
  -7   1 -16   -0.02    0.20
  -5   1 -16   54.70    2.01
  -3   1 -16   12.35    0.61
  -1   1 -16   36.75    1.32
   1   1 -16   21.38    0.81
   3   1 -16   89.85    4.33
   5   1 -16   -0.02    0.29
   7   1 -16   15.95    1.05
   9   1 -16   14.08    0.65
  11   1 -16  222.69    7.09
  13   1 -16   64.52    2.25
  15   1 -16   34.93    1.36
  17   1 -16    5.27    0.45
  19   1 -16   27.06    1.18
  21   1 -16    0.02    0.24
  23   1 -16    0.57    0.35
 -26   2 -16    1.45    0.85
 -24   2 -16    0.04    0.68
 -22   2 -16    4.43    0.96
 -20   2 -16    3.47    0.83
 -18   2 -16    6.75    0.98
 -16   2 -16    0.60    0.52
 -14   2 -16    0.80    0.52
 -12   2 -16   -0.38    0.48
 -10   2 -16    0.34    0.46
  -8   2 -16   93.53    3.16
  -6   2 -16    3.54    0.39
  -4   2 -16    7.34    0.51
  -2   2 -16   59.06    2.11
   0   2 -16    1.11    0.26
   2   2 -16    0.80    0.22
   4   2 -16    3.80    0.33
   6   2 -16   61.87    2.13
   8   2 -16    2.92    0.31
  10   2 -16   45.99    2.41
  12   2 -16   83.57    2.78
  14   2 -16    2.94    0.34
  16   2 -16    4.30    0.40
  18   2 -16    2.80    0.35
  20   2 -16   11.84    0.97
  22   2 -16    3.47    0.58
  24   2 -16    1.31    0.51
 -25   3 -16    0.27    0.76
 -23   3 -16    2.45    0.88
 -21   3 -16    2.27    0.85
 -19   3 -16   -0.34    0.47
 -17   3 -16    2.25    0.68
 -15   3 -16    1.66    0.64
 -13   3 -16    8.91    1.00
 -11   3 -16    7.87    0.88
  -9   3 -16    1.58    0.53
  -7   3 -16   -0.12    0.25
  -5   3 -16    0.11    0.26
  -3   3 -16    0.48    0.29
  -1   3 -16    6.21    0.49
   1   3 -16   12.90    0.95
   3   3 -16    0.10    0.20
   5   3 -16    0.43    0.26
   7   3 -16    4.21    0.36
   9   3 -16    0.33    0.21
  11   3 -16   32.45    1.24
  13   3 -16    6.15    0.44
  15   3 -16    3.98    0.38
  17   3 -16   14.27    1.04
  19   3 -16    0.16    0.33
  21   3 -16   12.12    1.04
  23   3 -16    1.34    0.46
  25   3 -16    5.24    0.81
  27   3 -16    0.59    0.49
 -24   4 -16    0.83    0.76
 -22   4 -16   15.45    1.55
 -20   4 -16   11.79    1.36
 -18   4 -16   12.40    1.31
 -16   4 -16   50.83    2.99
 -14   4 -16    0.61    0.50
 -12   4 -16   27.40    1.89
 -10   4 -16    0.19    0.42
  -8   4 -16    3.19    0.65
  -6   4 -16   15.47    1.23
  -4   4 -16    1.16    0.34
  -2   4 -16    0.18    0.32
   0   4 -16    0.35    0.25
   2   4 -16   84.64    2.41
   4   4 -16   80.57    3.90
   6   4 -16   13.54    0.69
   8   4 -16    0.74    0.26
  10   4 -16    4.88    0.40
  12   4 -16    7.31    0.70
  14   4 -16   16.81    1.15
  16   4 -16    2.57    0.53
  18   4 -16   13.31    1.05
  20   4 -16    4.80    0.69
  22   4 -16    5.35    0.80
  24   4 -16   -0.35    0.38
  26   4 -16    3.40    0.72
  28   4 -16    0.70    0.55
 -23   5 -16    4.48    1.10
 -21   5 -16   15.22    1.61
 -19   5 -16    0.61    0.61
 -17   5 -16   64.05    3.61
 -15   5 -16   -0.02    0.43
 -13   5 -16   16.06    1.45
 -11   5 -16   15.12    1.34
  -9   5 -16    7.09    0.92
  -7   5 -16    6.89    0.85
  -5   5 -16    0.98    0.51
  -3   5 -16    6.66    0.84
  -1   5 -16   13.58    0.71
   1   5 -16   24.07    0.86
   3   5 -16    5.30    0.36
   5   5 -16    1.77    0.33
   7   5 -16    1.79    0.29
   9   5 -16   19.98    1.29
  11   5 -16   41.91    2.14
  13   5 -16    0.05    0.33
  15   5 -16    1.38    0.46
  17   5 -16    1.16    0.45
  19   5 -16    3.55    0.66
  21   5 -16    0.15    0.37
  23   5 -16    6.49    0.88
  25   5 -16   -0.35    0.39
  27   5 -16    3.29    0.78
 -20   6 -16    4.22    1.08
 -18   6 -16    7.52    1.18
 -16   6 -16   -0.01    0.57
 -14   6 -16    2.88    0.79
 -12   6 -16    0.61    0.51
 -10   6 -16   15.85    1.40
  -8   6 -16   13.70    1.27
  -6   6 -16    3.15    0.73
  -4   6 -16    0.75    0.53
  -2   6 -16    0.15    0.27
   0   6 -16    4.52    0.43
   2   6 -16    8.36    0.57
   4   6 -16   16.84    0.80
   6   6 -16   28.86    1.60
   8   6 -16    0.14    0.32
  10   6 -16    6.70    0.74
  12   6 -16   13.53    1.03
  14   6 -16    6.05    0.75
  16   6 -16   32.42    1.89
  18   6 -16    8.55    0.93
  20   6 -16   17.20    1.35
  22   6 -16    1.59    0.58
  24   6 -16    0.59    0.53
 -19   7 -16    2.96    0.93
 -17   7 -16    1.86    0.73
 -15   7 -16    1.30    0.71
 -13   7 -16    4.17    0.92
 -11   7 -16    2.45    0.72
  -9   7 -16    0.98    0.58
  -7   7 -16   15.13    1.37
  -5   7 -16    0.13    0.49
  -3   7 -16   13.37    1.25
  -1   7 -16   18.39    1.45
   1   7 -16   14.61    1.29
   3   7 -16   25.02    1.14
   5   7 -16    1.93    0.46
   7   7 -16   33.22    1.92
   9   7 -16    5.97    0.73
  11   7 -16    0.06    0.36
  13   7 -16    0.75    0.45
  15   7 -16    0.45    0.41
  17   7 -16    1.90    0.59
  19   7 -16    0.50    0.49
  21   7 -16    0.25    0.49
 -16   8 -16    2.11    0.82
 -14   8 -16    0.34    0.66
 -12   8 -16   -0.39    0.53
 -10   8 -16    0.49    0.68
  -8   8 -16    3.06    0.86
  -4   8 -16    7.97    1.07
  -2   8 -16    0.64    0.53
   0   8 -16    0.17    0.46
   2   8 -16   -0.36    0.43
   4   8 -16    3.20    0.59
   6   8 -16    2.49    0.57
   8   8 -16    5.81    0.80
  10   8 -16    1.49    0.52
  12   8 -16   -0.42    0.36
  14   8 -16    0.26    0.49
  16   8 -16   -0.45    0.47
  18   8 -16    0.72    0.52
 -11   9 -16    2.06    0.88
  -9   9 -16    8.06    1.25
  -7   9 -16   10.98    1.27
  -5   9 -16    2.98    0.84
  -3   9 -16    5.72    0.99
  -1   9 -16    0.04    0.48
   1   9 -16   -0.40    0.48
   7   9 -16    4.48    0.76
   9   9 -16    1.33    0.56
  11   9 -16    0.82    0.52
  13   9 -16   10.80    1.11
  15   9 -16    1.26    0.62
  -6  10 -16    0.91    0.67
  -4  10 -16    2.16    0.79
  -2  10 -16    0.94    0.72
   0  10 -16    9.48    1.30
  10  10 -16    1.14    0.58
  -6 -10 -15   -1.14    0.65
  -4 -10 -15    9.18    1.37
  -2 -10 -15    4.85    1.12
   0 -10 -15   18.81    1.78
   2 -10 -15   10.23    1.39
 -11  -9 -15    0.96    0.74
  -9  -9 -15    3.19    0.90
  -7  -9 -15    7.71    1.11
  -5  -9 -15    2.43    0.82
  -3  -9 -15    1.96    0.77
  -1  -9 -15    0.51    0.65
   1  -9 -15    0.13    0.61
  13  -9 -15    1.99    0.73
  15  -9 -15    3.36    0.88
 -16  -8 -15   -0.21    0.67
 -14  -8 -15   -0.21    0.65
 -12  -8 -15    0.60    0.67
 -10  -8 -15    8.78    1.17
  -8  -8 -15   -0.48    0.53
  -6  -8 -15    7.83    1.07
  -4  -8 -15    3.93    0.83
  -2  -8 -15   15.32    1.44
   0  -8 -15    5.69    0.93
   8  -8 -15    0.93    0.54
  10  -8 -15    3.86    0.77
  12  -8 -15    1.66    0.66
  14  -8 -15    1.25    0.62
  16  -8 -15    3.53    0.81
  18  -8 -15    0.19    0.60
 -19  -7 -15   -0.17    0.65
 -17  -7 -15    0.60    0.68
 -15  -7 -15    4.52    0.90
 -13  -7 -15    0.95    0.68
 -11  -7 -15    0.80    0.59
  -9  -7 -15    0.11    0.58
  -7  -7 -15    0.20    0.48
  -5  -7 -15    9.09    1.02
  -3  -7 -15    1.42    0.62
  -1  -7 -15    8.42    0.98
   5  -7 -15    0.74    0.49
   7  -7 -15    0.86    0.51
   9  -7 -15   12.21    1.18
  11  -7 -15    4.63    0.79
  13  -7 -15    0.40    0.53
  15  -7 -15    3.58    0.78
  17  -7 -15    2.36    0.72
  19  -7 -15    6.34    1.01
  21  -7 -15    0.58    0.62
 -20  -6 -15    1.13    0.81
 -18  -6 -15    0.32    0.66
 -16  -6 -15    0.06    0.59
 -14  -6 -15   -0.17    0.51
 -12  -6 -15    4.53    0.83
 -10  -6 -15    3.67    0.74
  -8  -6 -15    0.09    0.48
  -6  -6 -15    4.26    0.76
  -4  -6 -15   -0.05    0.47
  -2  -6 -15   -0.10    0.48
   0  -6 -15    2.83    0.65
   2  -6 -15   -0.18    0.35
   4  -6 -15    0.89    0.49
   6  -6 -15    0.57    0.52
   8  -6 -15    2.24    0.63
  10  -6 -15    6.32    0.87
  12  -6 -15    1.21    0.54
  14  -6 -15    1.56    0.59
  16  -6 -15    0.92    0.53
  18  -6 -15    5.45    0.90
  20  -6 -15   -0.60    0.45
  22  -6 -15    1.25    0.65
  24  -6 -15    2.18    0.77
 -23  -5 -15   -0.91    0.80
 -21  -5 -15    1.55    0.94
 -17  -5 -15   -0.06    0.57
 -15  -5 -15    4.32    0.85
 -13  -5 -15    8.39    0.98
 -11  -5 -15    0.14    0.52
  -9  -5 -15   69.96    3.87
  -7  -5 -15    1.71    0.59
  -5  -5 -15    9.44    0.97
  -3  -5 -15   10.20    1.00
  -1  -5 -15    0.45    0.25
   1  -5 -15   43.34    2.23
   3  -5 -15   15.85    1.12
   5  -5 -15    3.21    0.60
   7  -5 -15    2.46    0.61
   9  -5 -15    1.39    0.54
  11  -5 -15    4.00    0.72
  13  -5 -15    6.93    0.90
  15  -5 -15    6.55    0.89
  17  -5 -15    4.67    0.82
  19  -5 -15   12.17    1.27
  21  -5 -15   -0.32    0.46
  23  -5 -15   16.63    1.56
  25  -5 -15    0.14    0.56
 -24  -4 -15   -0.52    0.78
 -22  -4 -15    0.56    0.78
 -20  -4 -15    9.02    1.26
 -18  -4 -15   -0.52    0.58
 -16  -4 -15    7.40    0.97
 -14  -4 -15   28.97    1.89
 -12  -4 -15    1.81    0.66
 -10  -4 -15    4.99    0.75
  -8  -4 -15    2.36    0.62
  -6  -4 -15   12.71    1.07
  -4  -4 -15   31.36    1.22
  -2  -4 -15   11.17    0.58
   0  -4 -15    5.74    0.44
   2  -4 -15  109.71    4.99
   4  -4 -15   52.23    2.61
   6  -4 -15    2.98    0.54
   8  -4 -15    0.38    0.43
  10  -4 -15    8.21    0.90
  12  -4 -15   13.80    1.21
  14  -4 -15   11.05    1.07
  16  -4 -15    6.26    0.89
  18  -4 -15    0.78    0.51
  20  -4 -15    1.42    0.61
  22  -4 -15    0.36    0.54
  24  -4 -15   10.50    1.26
  26  -4 -15    4.08    0.91
  28  -4 -15    0.64    0.72
 -25  -3 -15    0.65    0.83
 -23  -3 -15    0.56    0.80
 -21  -3 -15   -0.20    0.69
 -19  -3 -15    0.49    0.64
 -17  -3 -15    0.26    0.60
 -15  -3 -15    2.45    0.78
 -13  -3 -15   -0.53    0.50
 -11  -3 -15    2.23    0.63
  -9  -3 -15    1.01    0.53
  -7  -3 -15    2.60    0.29
  -5  -3 -15    2.63    0.28
  -3  -3 -15    0.67    0.20
  -1  -3 -15   17.77    0.78
   1  -3 -15    7.96    0.64
   3  -3 -15   21.13    1.22
   5  -3 -15   12.20    0.92
   7  -3 -15    4.46    0.61
   9  -3 -15   27.32    1.71
  11  -3 -15   13.52    1.06
  13  -3 -15    0.01    0.43
  15  -3 -15   10.87    1.07
  17  -3 -15   16.08    1.30
  19  -3 -15   11.81    1.16
  21  -3 -15    0.63    0.52
  23  -3 -15    2.00    0.70
  25  -3 -15    7.25    1.06
  27  -3 -15    4.43    0.91
  29  -3 -15    1.82    0.78
 -26  -2 -15    4.50    1.14
 -24  -2 -15    1.36    0.85
 -22  -2 -15    2.49    0.82
 -20  -2 -15    1.12    0.66
 -18  -2 -15   10.21    1.17
 -16  -2 -15    2.07    0.69
 -14  -2 -15   22.56    1.61
 -12  -2 -15    2.34    0.65
 -10  -2 -15   19.26    1.05
  -8  -2 -15   10.73    0.54
  -6  -2 -15   12.77    0.62
  -4  -2 -15    2.37    0.26
  -2  -2 -15   75.38    2.53
   0  -2 -15   61.33    2.04
   2  -2 -15  115.99    5.63
   4  -2 -15    1.37    0.36
   6  -2 -15   10.37    0.82
   8  -2 -15    6.21    0.68
  10  -2 -15    9.12    0.90
  12  -2 -15   14.68    1.15
  14  -2 -15    0.36    0.49
  16  -2 -15   23.82    1.65
  18  -2 -15    8.48    0.96
  20  -2 -15   22.02    1.60
  22  -2 -15    2.33    0.66
  24  -2 -15    7.08    1.01
  26  -2 -15    1.34    0.64
  28  -2 -15    1.64    0.69
  30  -2 -15    3.93    0.90
 -27  -1 -15    1.57    0.85
 -25  -1 -15    1.38    0.78
 -23  -1 -15    1.17    0.81
 -21  -1 -15   -0.19    0.49
 -19  -1 -15    2.49    0.78
 -17  -1 -15    5.58    0.87
 -15  -1 -15    9.12    1.00
 -13  -1 -15    1.43    0.58
 -11  -1 -15   24.29    0.98
  -9  -1 -15   39.97    1.46
  -7  -1 -15    5.81    0.41
  -5  -1 -15   73.06    3.36
  -3  -1 -15   25.49    0.96
  -1  -1 -15   54.37    1.93
   1  -1 -15   35.95    1.25
   3  -1 -15    5.68    0.56
   5  -1 -15   22.22    1.33
   7  -1 -15  116.43    5.63
   9  -1 -15   33.56    1.88
  11  -1 -15    4.92    0.65
  13  -1 -15   74.83    3.76
  15  -1 -15   44.55    2.34
  17  -1 -15    9.88    0.98
  21  -1 -15   59.72    3.27
  23  -1 -15    3.86    0.73
  25  -1 -15    1.02    0.54
  27  -1 -15    0.99    0.61
 -26   0 -15    0.25    0.76
 -24   0 -15    1.01    0.78
 -22   0 -15   -0.08    0.55
 -20   0 -15   -0.16    0.47
 -18   0 -15    0.68    0.55
 -16   0 -15    0.14    0.55
 -14   0 -15   -0.03    0.49
 -12   0 -15   -0.31    0.43
 -10   0 -15   -0.11    0.21
  -8   0 -15    0.31    0.21
  -6   0 -15   -0.22    0.18
  -4   0 -15    0.16    0.17
  -2   0 -15    0.26    0.19
   2   0 -15    0.22    0.27
   4   0 -15    0.10    0.30
   6   0 -15    0.58    0.34
   8   0 -15    0.13    0.33
  10   0 -15    0.07    0.37
  12   0 -15    0.49    0.20
  14   0 -15    0.00    0.20
  16   0 -15    0.33    0.23
  18   0 -15    0.06    0.28
  20   0 -15    0.08    0.23
  22   0 -15    0.07    0.41
  24   0 -15    0.96    0.51
 -27   1 -15    0.77    0.82
 -25   1 -15    2.51    0.90
 -23   1 -15    3.75    0.90
 -21   1 -15    0.80    0.64
 -19   1 -15    4.02    0.84
 -17   1 -15    4.90    0.84
 -15   1 -15    9.39    0.99
 -13   1 -15    1.39    0.58
 -11   1 -15   18.81    1.44
  -9   1 -15   37.42    1.48
  -7   1 -15    5.26    0.42
  -5   1 -15   68.10    2.44
  -3   1 -15   25.49    1.00
  -1   1 -15   57.16    1.97
   1   1 -15   36.43    1.27
   3   1 -15    5.17    0.56
   5   1 -15   24.32    1.33
   7   1 -15  121.49    3.90
   9   1 -15   35.22    1.27
  11   1 -15    3.15    0.42
  13   1 -15   75.39    2.56
  15   1 -15   41.86    2.22
  17   1 -15    9.65    0.90
  21   1 -15   60.31    3.16
  23   1 -15    3.05    0.55
 -26   2 -15    3.74    1.10
 -24   2 -15   -0.34    0.62
 -22   2 -15    1.60    0.70
 -20   2 -15    0.05    0.59
 -18   2 -15   13.00    1.25
 -16   2 -15    1.78    0.65
 -14   2 -15   21.03    1.57
 -12   2 -15    2.05    0.62
 -10   2 -15   18.76    1.37
  -8   2 -15   10.28    0.63
  -6   2 -15   11.68    0.68
  -4   2 -15    2.53    0.33
  -2   2 -15   72.62    2.58
   0   2 -15   58.02    2.08
   2   2 -15  125.85    3.99
   4   2 -15    1.23    0.25
   6   2 -15    9.72    0.53
   8   2 -15    5.53    0.60
  10   2 -15   11.85    0.59
  12   2 -15   14.19    0.71
  14   2 -15    1.23    0.25
  16   2 -15   24.62    1.04
  18   2 -15    8.00    0.52
  20   2 -15   23.14    1.40
  22   2 -15    2.15    0.50
  24   2 -15    7.77    0.84
 -25   3 -15    0.61    0.84
 -23   3 -15    0.35    0.72
 -21   3 -15   -0.64    0.52
 -19   3 -15    0.20    0.56
 -17   3 -15    0.13    0.56
 -15   3 -15    3.71    0.76
 -13   3 -15    0.36    0.52
 -11   3 -15    2.72    0.60
  -9   3 -15    0.24    0.49
  -7   3 -15    3.70    0.67
  -5   3 -15    2.22    0.36
  -3   3 -15    0.54    0.31
  -1   3 -15   17.86    0.85
   1   3 -15    8.30    0.50
   3   3 -15   20.12    0.70
   5   3 -15   12.10    0.93
   7   3 -15    6.07    0.53
   9   3 -15   29.92    1.11
  11   3 -15   11.81    0.62
  13   3 -15    0.18    0.21
  15   3 -15   11.81    0.62
  17   3 -15   17.13    1.12
  19   3 -15   10.19    0.90
  21   3 -15    0.12    0.37
  23   3 -15    2.80    0.58
  25   3 -15    7.20    0.87
  27   3 -15    5.12    0.82
 -24   4 -15    0.10    0.73
 -22   4 -15    0.24    0.72
 -20   4 -15   12.61    1.40
 -18   4 -15    0.08    0.56
 -16   4 -15    8.27    1.03
 -14   4 -15   27.77    1.92
 -12   4 -15    3.92    0.73
 -10   4 -15    3.29    0.69
  -8   4 -15    1.90    0.57
  -6   4 -15   12.96    1.13
  -4   4 -15   31.73    1.34
  -2   4 -15   10.09    0.66
   0   4 -15    5.89    0.44
   2   4 -15  103.19    2.88
   4   4 -15   49.73    1.77
   6   4 -15    3.43    0.37
   8   4 -15    0.18    0.23
  10   4 -15    8.93    0.52
  12   4 -15   15.79    1.04
  14   4 -15   12.13    0.90
  16   4 -15    6.66    0.71
  18   4 -15    0.21    0.32
  20   4 -15    1.52    0.47
  22   4 -15    0.14    0.41
  24   4 -15   12.19    1.11
  26   4 -15    3.56    0.71
  28   4 -15    1.21    0.58
 -23   5 -15   -0.17    0.65
 -21   5 -15    3.27    0.90
 -19   5 -15    7.95    1.18
 -17   5 -15    1.90    0.70
 -15   5 -15    7.70    1.01
 -13   5 -15    9.92    1.10
 -11   5 -15    0.84    0.53
  -9   5 -15   73.58    4.02
  -7   5 -15    1.20    0.55
  -5   5 -15    9.68    1.00
  -3   5 -15    9.74    1.00
  -1   5 -15    0.37    0.33
   1   5 -15   42.23    1.67
   3   5 -15   16.50    0.66
   5   5 -15    3.07    0.35
   7   5 -15    2.93    0.34
   9   5 -15    2.44    0.48
  11   5 -15    3.51    0.55
  13   5 -15    8.49    0.80
  15   5 -15    6.95    0.75
  17   5 -15    5.85    0.71
  19   5 -15   13.94    1.11
  21   5 -15    0.81    0.45
  23   5 -15   15.35    1.33
  25   5 -15    0.32    0.46
  27   5 -15    1.62    0.68
 -22   6 -15    0.24    0.74
 -20   6 -15    0.87    0.79
 -18   6 -15   -0.11    0.57
 -16   6 -15    0.16    0.62
 -14   6 -15   -0.28    0.47
 -12   6 -15    4.09    0.82
 -10   6 -15    4.52    0.82
  -8   6 -15   -0.20    0.43
  -6   6 -15    3.19    0.73
  -4   6 -15    0.04    0.48
  -2   6 -15   -0.05    0.28
   0   6 -15    1.31    0.53
   2   6 -15    0.11    0.24
   4   6 -15    0.99    0.41
   6   6 -15   -0.25    0.31
   8   6 -15    1.74    0.47
  10   6 -15    5.45    0.68
  12   6 -15    0.58    0.38
  14   6 -15    0.37    0.33
  16   6 -15   -0.14    0.36
  18   6 -15    4.70    0.72
  20   6 -15   -0.24    0.38
  22   6 -15    1.72    0.58
  24   6 -15    2.71    0.69
 -19   7 -15    1.15    0.79
 -17   7 -15    0.56    0.62
 -15   7 -15    4.48    0.96
 -13   7 -15    0.62    0.63
 -11   7 -15    0.59    0.54
  -9   7 -15    2.08    0.65
  -7   7 -15   -0.34    0.43
  -5   7 -15    8.78    1.08
  -3   7 -15    0.52    0.51
  -1   7 -15    6.70    0.92
   1   7 -15    9.68    0.65
   3   7 -15    0.17    0.27
   5   7 -15    0.25    0.36
   7   7 -15    0.04    0.36
   9   7 -15   13.11    1.03
  11   7 -15    4.66    0.70
  13   7 -15    0.87    0.45
  15   7 -15    3.76    0.70
  17   7 -15    0.71    0.48
  19   7 -15    5.88    0.85
  21   7 -15    1.06    0.53
 -16   8 -15    1.12    0.73
 -14   8 -15    0.33    0.64
 -12   8 -15   -0.12    0.59
 -10   8 -15    9.65    1.28
  -8   8 -15    0.46    0.57
  -4   8 -15    3.95    0.82
  -2   8 -15   15.74    1.44
   0   8 -15    3.37    0.77
   2   8 -15    4.38    0.83
   4   8 -15    5.21    0.69
   6   8 -15    0.70    0.46
   8   8 -15    0.38    0.42
  10   8 -15    1.71    0.56
  12   8 -15    1.56    0.53
  14   8 -15    1.83    0.59
  16   8 -15    2.29    0.64
  18   8 -15   -0.04    0.47
 -11   9 -15    0.86    0.73
  -9   9 -15    4.19    1.03
  -7   9 -15    3.45    0.87
  -5   9 -15    3.16    0.83
  -3   9 -15    0.99    0.65
  -1   9 -15    1.14    0.62
   1   9 -15    0.14    0.52
   7   9 -15    0.55    0.48
   9   9 -15    1.91    0.57
  11   9 -15    1.56    0.61
  13   9 -15    2.44    0.68
  15   9 -15    6.11    0.91
  -6  10 -15    0.22    0.63
  -4  10 -15   11.79    1.37
  -2  10 -15    5.13    1.04
   0  10 -15   14.61    1.58
  10  10 -15    0.73    0.60
  -6 -10 -14   -0.56    0.69
  -4 -10 -14    2.82    0.92
  -2 -10 -14    1.10    0.85
   0 -10 -14    1.01    0.74
   2 -10 -14    0.68    0.74
 -11  -9 -14    0.58    0.74
  -9  -9 -14   -0.21    0.60
  -7  -9 -14    0.31    0.65
  -5  -9 -14    0.07    0.64
  -3  -9 -14    3.47    0.94
  -1  -9 -14   19.65    1.74
   1  -9 -14   20.97    1.73
  11  -9 -14    4.85    0.86
  13  -9 -14    0.18    0.56
  15  -9 -14    0.60    0.64
 -16  -8 -14    5.92    1.04
 -14  -8 -14    0.55    0.73
 -12  -8 -14    6.70    1.04
 -10  -8 -14   -0.43    0.56
  -8  -8 -14    0.02    0.58
  -6  -8 -14    1.00    0.62
  -4  -8 -14    6.58    0.97
  -2  -8 -14   -0.30    0.54
   0  -8 -14    2.87    0.77
   8  -8 -14    0.68    0.52
  10  -8 -14    0.52    0.57
  12  -8 -14    2.11    0.70
  14  -8 -14    2.78    0.76
  16  -8 -14    5.04    0.94
  18  -8 -14    0.76    0.65
 -19  -7 -14    0.81    0.77
 -17  -7 -14   23.81    1.98
 -15  -7 -14   -0.48    0.56
 -13  -7 -14   10.23    1.20
 -11  -7 -14    0.15    0.54
  -9  -7 -14   -0.14    0.50
  -7  -7 -14    1.42    0.61
  -5  -7 -14    0.41    0.52
  -3  -7 -14   -1.32    0.41
  -1  -7 -14   -0.03    0.48
   5  -7 -14   -0.03    0.48
   7  -7 -14    1.58    0.58
   9  -7 -14   41.24    2.42
  11  -7 -14   13.05    1.24
  13  -7 -14    3.49    0.75
  15  -7 -14    1.86    0.67
  17  -7 -14    6.75    1.00
  19  -7 -14    2.76    0.78
  21  -7 -14    0.95    0.64
 -22  -6 -14    0.98    0.96
 -20  -6 -14   -0.40    0.70
 -18  -6 -14    0.28    0.67
 -16  -6 -14    2.10    0.73
 -14  -6 -14    4.04    0.82
 -12  -6 -14   -0.10    0.53
 -10  -6 -14   10.66    1.08
  -8  -6 -14    4.79    0.79
  -6  -6 -14   -0.37    0.48
  -4  -6 -14   14.89    1.28
  -2  -6 -14    3.95    0.73
   0  -6 -14   11.32    1.10
   2  -6 -14    7.07    0.74
   4  -6 -14   43.93    2.35
   6  -6 -14    3.99    0.71
   8  -6 -14    2.14    0.61
  10  -6 -14   44.20    2.53
  12  -6 -14    3.58    0.73
  14  -6 -14    1.64    0.61
  16  -6 -14   -0.32    0.45
  18  -6 -14    0.75    0.59
  20  -6 -14    8.58    1.13
  22  -6 -14    0.07    0.56
  24  -6 -14    0.43    0.61
 -23  -5 -14   -0.53    0.82
 -21  -5 -14    6.55    1.20
 -17  -5 -14    1.44    0.69
 -15  -5 -14    1.21    0.64
 -13  -5 -14   -0.29    0.47
 -11  -5 -14   20.30    1.47
  -9  -5 -14    3.33    0.70
  -7  -5 -14    7.08    0.87
  -5  -5 -14    0.68    0.50
  -3  -5 -14    1.33    0.55
  -1  -5 -14   30.46    1.23
   1  -5 -14    0.78    0.35
   3  -5 -14    9.22    0.82
   5  -5 -14    1.02    0.47
   7  -5 -14    8.00    0.85
   9  -5 -14    3.87    0.70
  11  -5 -14    0.23    0.51
  13  -5 -14    0.04    0.46
  15  -5 -14   11.93    1.20
  17  -5 -14    5.01    0.84
  19  -5 -14    2.98    0.74
  21  -5 -14    0.07    0.52
  23  -5 -14    6.72    1.07
  25  -5 -14    0.26    0.60
 -24  -4 -14    0.63    0.84
 -22  -4 -14    0.36    0.72
 -20  -4 -14    1.78    0.82
 -18  -4 -14    2.76    0.90
 -16  -4 -14    7.72    0.97
 -14  -4 -14    4.64    0.84
 -12  -4 -14   -0.24    0.50
 -10  -4 -14   11.27    1.03
  -8  -4 -14   15.62    1.26
  -6  -4 -14    1.52    0.58
  -4  -4 -14   19.25    0.82
  -2  -4 -14    5.16    0.39
   0  -4 -14   11.65    0.62
   2  -4 -14   38.16    1.99
   4  -4 -14    0.68    0.39
   6  -4 -14   53.75    2.65
   8  -4 -14   19.45    1.37
  10  -4 -14   20.12    1.37
  12  -4 -14   -0.39    0.42
  14  -4 -14    4.72    0.77
  16  -4 -14    1.49    0.60
  18  -4 -14    2.83    0.69
  20  -4 -14    2.03    0.68
  22  -4 -14    0.69    0.60
  24  -4 -14    1.16    0.65
  26  -4 -14    5.70    1.06
  28  -4 -14    1.59    0.78
 -25  -3 -14    0.67    0.83
 -23  -3 -14    1.24    0.81
 -21  -3 -14    0.65    0.74
 -19  -3 -14    0.27    0.61
 -17  -3 -14    8.23    1.03
 -15  -3 -14    2.43    0.75
 -13  -3 -14    1.28    0.61
 -11  -3 -14    9.10    0.96
  -9  -3 -14   10.38    0.95
  -7  -3 -14    0.10    0.17
  -5  -3 -14    9.20    0.48
  -3  -3 -14   16.24    0.72
  -1  -3 -14    1.05    0.24
   1  -3 -14    1.22    0.31
   3  -3 -14    6.46    0.61
   5  -3 -14    0.35    0.33
   7  -3 -14    0.90    0.41
   9  -3 -14    4.41    0.62
  11  -3 -14   11.17    0.99
  13  -3 -14   14.35    1.14
  15  -3 -14    0.25    0.47
  17  -3 -14   27.61    1.81
  19  -3 -14    0.59    0.53
  21  -3 -14    5.09    0.87
  23  -3 -14   24.89    1.79
  25  -3 -14    0.79    0.62
  27  -3 -14    2.66    0.82
  29  -3 -14    0.28    0.65
 -26  -2 -14    2.37    0.94
 -24  -2 -14    1.39    0.82
 -22  -2 -14   35.68    2.43
 -20  -2 -14    5.64    0.99
 -18  -2 -14   16.44    1.40
 -16  -2 -14   34.84    2.27
 -14  -2 -14    5.96    0.89
 -12  -2 -14   54.32    2.98
 -10  -2 -14    0.91    0.23
  -8  -2 -14  104.44    3.42
  -6  -2 -14   -0.14    0.16
  -4  -2 -14   21.17    0.84
  -2  -2 -14   53.94    1.80
   0  -2 -14   28.22    1.04
   2  -2 -14    0.26    0.26
   4  -2 -14   26.11    1.44
   6  -2 -14    5.02    0.58
   8  -2 -14   34.45    1.95
  10  -2 -14    0.06    0.39
  12  -2 -14   16.02    1.18
  14  -2 -14   63.06    3.37
  18  -2 -14   16.10    1.32
  20  -2 -14   25.20    1.70
  22  -2 -14    0.28    0.51
  24  -2 -14    3.58    0.80
  26  -2 -14    0.33    0.59
  28  -2 -14    0.44    0.57
  30  -2 -14   12.81    1.37
 -27  -1 -14    2.53    0.92
 -25  -1 -14    1.98    0.84
 -23  -1 -14   -0.24    0.60
 -21  -1 -14    0.96    0.68
 -19  -1 -14    1.65    0.68
 -17  -1 -14    0.23    0.54
 -15  -1 -14    0.89    0.58
 -13  -1 -14    2.81    0.63
 -11  -1 -14    4.61    0.76
  -9  -1 -14   20.46    0.88
  -7  -1 -14    1.75    0.26
  -5  -1 -14   41.61    1.95
  -3  -1 -14   17.60    0.71
  -1  -1 -14   91.31    3.00
   1  -1 -14    7.98    0.42
   3  -1 -14   27.75    1.45
   5  -1 -14   99.58    4.73
   7  -1 -14    2.88    0.48
   9  -1 -14   65.77    3.31
  11  -1 -14   65.59    3.39
  13  -1 -14   26.95    1.61
  15  -1 -14   25.58    1.59
  17  -1 -14    0.49    0.47
  19  -1 -14   19.21    1.40
  23  -1 -14    2.14    0.63
  25  -1 -14    6.73    0.94
  27  -1 -14    3.12    0.77
 -26   0 -14    1.48    0.87
 -24   0 -14   10.94    1.38
 -22   0 -14   -0.18    0.57
 -20   0 -14    3.15    0.77
 -18   0 -14   32.86    2.16
 -16   0 -14   21.38    1.58
 -14   0 -14    2.10    0.61
 -12   0 -14   29.57    1.82
 -10   0 -14   -0.02    0.20
  -8   0 -14   18.61    0.83
  -6   0 -14   66.22    2.29
  -4   0 -14   23.66    0.91
  -2   0 -14   76.34    2.52
   0   0 -14  128.18    4.14
   2   0 -14   56.45    2.79
   4   0 -14   98.33    4.67
   6   0 -14   30.97    1.68
   8   0 -14   36.81    1.97
  10   0 -14    0.50    0.39
  12   0 -14   40.74    1.48
  14   0 -14   21.78    0.93
  16   0 -14    3.55    0.36
  18   0 -14   40.01    1.52
  20   0 -14   13.98    0.75
  22   0 -14    3.80    0.66
  24   0 -14    3.15    0.66
 -27   1 -14   -0.07    0.75
 -25   1 -14    0.60    0.68
 -23   1 -14    0.00    0.64
 -21   1 -14    0.54    0.60
 -19   1 -14    1.12    0.57
 -17   1 -14    0.40    0.55
 -15   1 -14    0.47    0.54
 -13   1 -14    1.02    0.53
 -11   1 -14    5.72    0.77
  -9   1 -14   21.62    0.94
  -7   1 -14    1.53    0.29
  -5   1 -14   37.55    1.44
  -3   1 -14   16.64    0.74
  -1   1 -14   90.47    3.04
   1   1 -14    7.99    0.41
   3   1 -14   25.04    1.44
   5   1 -14   99.49    4.70
   7   1 -14    3.59    0.30
   9   1 -14   66.59    2.26
  11   1 -14   68.65    2.31
  13   1 -14   27.68    1.55
  15   1 -14   24.41    0.98
  17   1 -14    0.55    0.24
  19   1 -14   17.74    0.84
  21   1 -14   25.52    1.08
 -26   2 -14    1.51    0.91
 -24   2 -14    1.29    0.79
 -22   2 -14   35.50    2.41
 -20   2 -14    7.52    1.06
 -18   2 -14   17.61    1.49
 -16   2 -14   40.52    2.37
 -14   2 -14    8.52    0.98
 -12   2 -14   55.12    2.98
 -10   2 -14    0.68    0.50
  -8   2 -14  101.70    3.52
  -6   2 -14    0.07    0.22
  -4   2 -14   20.35    0.89
  -2   2 -14   50.09    1.85
   0   2 -14   27.26    1.07
   2   2 -14    0.23    0.20
   4   2 -14   25.32    0.99
   6   2 -14    4.82    0.35
   8   2 -14   35.36    1.28
  10   2 -14   -0.08    0.18
  12   2 -14   15.30    0.72
  14   2 -14   65.26    2.23
  16   2 -14    0.96    0.26
  18   2 -14   16.17    0.77
  20   2 -14   23.66    1.44
  22   2 -14    1.36    0.44
  24   2 -14    2.31    0.59
 -25   3 -14    1.05    0.84
 -23   3 -14    1.17    0.70
 -21   3 -14    1.00    0.70
 -19   3 -14    0.76    0.57
 -15   3 -14    2.35    0.67
 -13   3 -14    1.62    0.59
 -11   3 -14   10.69    1.04
  -9   3 -14   10.74    0.99
  -7   3 -14    0.09    0.48
  -5   3 -14    8.09    0.57
  -3   3 -14   14.95    0.79
  -1   3 -14    0.57    0.29
   1   3 -14    0.96    0.24
   3   3 -14    6.37    0.35
   5   3 -14    0.17    0.21
   7   3 -14    0.66    0.24
   9   3 -14    4.87    0.37
  11   3 -14   11.29    0.60
  13   3 -14   13.60    0.66
  15   3 -14    0.25    0.31
  17   3 -14   29.77    1.60
  19   3 -14   -0.03    0.28
  21   3 -14    4.78    0.69
  23   3 -14   24.22    1.58
  25   3 -14    0.79    0.50
  27   3 -14    1.50    0.57
 -24   4 -14    0.40    0.68
 -22   4 -14    0.60    0.64
 -20   4 -14    2.28    0.79
 -18   4 -14    3.65    0.86
 -16   4 -14    6.84    0.96
 -14   4 -14    6.32    0.89
 -12   4 -14    0.59    0.49
 -10   4 -14    9.58    1.00
  -8   4 -14   15.39    1.24
  -6   4 -14    2.66    0.62
  -4   4 -14   16.32    1.32
  -2   4 -14    4.27    0.44
   0   4 -14   11.23    0.62
   2   4 -14   37.48    1.15
   4   4 -14    0.98    0.27
   6   4 -14   52.33    1.77
   8   4 -14   22.19    0.89
  10   4 -14   20.48    0.83
  12   4 -14    0.10    0.28
  14   4 -14    3.39    0.53
  16   4 -14    1.32    0.42
  18   4 -14    1.95    0.48
  20   4 -14    2.09    0.53
  22   4 -14    0.77    0.45
  24   4 -14    1.50    0.54
  26   4 -14    7.11    0.94
  28   4 -14    0.36    0.56
 -23   5 -14    0.25    0.73
 -21   5 -14    7.09    1.21
 -19   5 -14   11.45    1.34
 -17   5 -14    0.73    0.58
 -15   5 -14    1.61    0.65
 -13   5 -14   -0.51    0.39
 -11   5 -14   15.59    1.35
  -9   5 -14    3.22    0.70
  -7   5 -14    7.21    0.90
  -5   5 -14    0.59    0.48
  -3   5 -14    0.24    0.27
  -1   5 -14   32.22    1.66
   1   5 -14    0.13    0.21
   3   5 -14    7.58    0.43
   5   5 -14    0.79    0.27
   7   5 -14    7.61    0.49
   9   5 -14    4.86    0.58
  11   5 -14   -0.49    0.26
  13   5 -14    0.76    0.34
  15   5 -14   10.91    0.97
  17   5 -14    5.13    0.68
  19   5 -14    1.81    0.48
  21   5 -14    0.41    0.39
  23   5 -14    9.24    0.98
  25   5 -14    0.59    0.51
  27   5 -14    4.11    0.87
 -22   6 -14    0.40    0.79
 -20   6 -14    0.65    0.75
 -18   6 -14    0.50    0.70
 -16   6 -14    2.54    0.79
 -14   6 -14    5.25    0.92
 -12   6 -14   -0.20    0.43
 -10   6 -14   10.44    1.13
  -8   6 -14    4.35    0.79
  -6   6 -14    1.45    0.58
  -4   6 -14   15.86    1.32
  -2   6 -14    4.56    0.52
   0   6 -14   12.61    0.69
   2   6 -14    6.49    0.50
   4   6 -14   40.78    2.17
   6   6 -14    5.06    0.62
   8   6 -14    1.07    0.42
  10   6 -14   44.75    2.31
  12   6 -14    5.73    0.69
  14   6 -14    1.52    0.44
  16   6 -14   -0.02    0.35
  18   6 -14    0.50    0.44
  20   6 -14    7.59    0.91
  22   6 -14    0.04    0.38
  24   6 -14    0.51    0.48
 -19   7 -14    1.09    0.83
 -17   7 -14   26.21    2.14
 -15   7 -14   -0.32    0.57
 -13   7 -14   10.67    1.26
 -11   7 -14   -0.59    0.45
  -9   7 -14   -0.07    0.46
  -7   7 -14    0.64    0.54
  -5   7 -14    2.09    0.65
  -3   7 -14   -0.07    0.44
  -1   7 -14   -0.38    0.42
   1   7 -14   -0.25    0.23
   3   7 -14   17.99    0.92
   5   7 -14   -0.37    0.30
   7   7 -14    1.23    0.43
   9   7 -14   43.34    2.26
  11   7 -14   13.71    1.11
  13   7 -14    2.28    0.56
  15   7 -14    2.92    0.61
  17   7 -14    6.93    0.87
  19   7 -14    2.35    0.63
  21   7 -14    0.14    0.43
 -16   8 -14    4.70    1.07
 -14   8 -14   -0.42    0.55
 -12   8 -14    6.71    1.11
 -10   8 -14    0.29    0.61
  -8   8 -14   -0.25    0.55
  -4   8 -14    7.21    1.01
  -2   8 -14    0.34    0.52
   0   8 -14    2.29    0.67
   2   8 -14   15.53    1.43
   4   8 -14    0.61    0.41
   6   8 -14    5.27    0.72
   8   8 -14    0.66    0.44
  10   8 -14    0.09    0.40
  12   8 -14    0.97    0.47
  14   8 -14    0.76    0.50
  16   8 -14    7.63    0.93
  18   8 -14   -0.10    0.44
 -13   9 -14    0.56    0.75
 -11   9 -14    1.28    0.81
  -9   9 -14    0.98    0.69
  -7   9 -14   -0.26    0.54
  -5   9 -14    0.32    0.59
  -3   9 -14    3.88    0.90
  -1   9 -14   17.88    1.65
   1   9 -14   15.27    1.54
   7   9 -14    5.63    0.80
   9   9 -14    2.33    0.61
  11   9 -14    5.30    0.83
  13   9 -14    0.67    0.51
  15   9 -14   -0.20    0.46
  -6  10 -14   -0.22    0.62
  -4  10 -14    2.25    0.73
  -2  10 -14    0.84    0.71
   0  10 -14   -0.51    0.55
  10  10 -14    0.23    0.56
  -6 -10 -13   12.14    1.50
  -4 -10 -13    5.39    1.12
  -2 -10 -13    5.58    1.15
   0 -10 -13    4.19    1.07
   2 -10 -13    1.59    0.86
 -13  -9 -13    1.66    0.86
 -11  -9 -13    0.44    0.73
  -9  -9 -13    9.40    1.26
  -7  -9 -13    1.12    0.74
  -5  -9 -13   -0.34    0.56
  -3  -9 -13   10.20    1.29
  -1  -9 -13    0.16    0.62
   1  -9 -13    7.07    1.10
  11  -9 -13    3.99    0.80
  13  -9 -13    0.27    0.57
  15  -9 -13    4.89    0.98
  17  -9 -13    0.37    0.66
 -16  -8 -13    1.88    0.85
 -14  -8 -13    3.81    0.95
 -12  -8 -13   -0.10    0.62
 -10  -8 -13    0.88    0.68
  -8  -8 -13    7.23    1.01
  -6  -8 -13    0.65    0.63
  -4  -8 -13    6.14    0.98
  -2  -8 -13    0.89    0.64
   0  -8 -13    0.38    0.61
   8  -8 -13    0.98    0.52
  10  -8 -13   14.29    1.32
  12  -8 -13    0.14    0.54
  14  -8 -13    9.00    1.12
  16  -8 -13    8.98    1.15
  18  -8 -13    5.37    0.99
 -19  -7 -13   -0.07    0.74
 -17  -7 -13    1.48    0.77
 -15  -7 -13    6.05    1.00
 -13  -7 -13    0.56    0.64
 -11  -7 -13   18.06    1.56
  -9  -7 -13   25.69    1.85
  -7  -7 -13    2.23    0.64
  -5  -7 -13   -0.02    0.50
  -3  -7 -13   -0.19    0.51
  -1  -7 -13    0.22    0.50
   5  -7 -13   -0.04    0.46
   7  -7 -13    1.41    0.55
   9  -7 -13    2.11    0.64
  11  -7 -13    0.28    0.50
  13  -7 -13    0.24    0.53
  15  -7 -13   -0.58    0.43
  17  -7 -13    2.49    0.73
  19  -7 -13   -0.14    0.53
  21  -7 -13    0.32    0.58
 -20  -6 -13    8.82    1.27
 -18  -6 -13    8.33    1.18
 -16  -6 -13   -0.01    0.58
 -14  -6 -13    0.14    0.57
 -12  -6 -13    4.80    0.85
 -10  -6 -13    0.76    0.56
  -8  -6 -13   31.11    2.04
  -6  -6 -13    0.51    0.56
  -4  -6 -13    2.41    0.65
  -2  -6 -13   15.39    1.31
   2  -6 -13    2.53    0.53
   4  -6 -13    4.39    0.69
   6  -6 -13    1.09    0.53
   8  -6 -13    0.06    0.52
  10  -6 -13    0.27    0.51
  12  -6 -13    0.04    0.47
  14  -6 -13   10.63    1.16
  16  -6 -13    0.19    0.55
  18  -6 -13    0.02    0.51
  20  -6 -13    5.96    0.99
  22  -6 -13    0.54    0.61
  24  -6 -13    7.75    1.17
 -23  -5 -13   -2.34    0.70
 -21  -5 -13   -0.46    0.78
 -19  -5 -13    0.99    0.71
 -17  -5 -13    2.69    0.77
 -15  -5 -13    1.30    0.63
 -13  -5 -13    6.78    0.92
 -11  -5 -13    9.81    1.09
  -9  -5 -13    6.08    0.84
  -7  -5 -13    0.88    0.53
  -5  -5 -13   10.48    1.00
  -3  -5 -13    0.62    0.50
  -1  -5 -13   62.13    2.21
   1  -5 -13    0.10    0.31
   3  -5 -13    9.65    0.85
   5  -5 -13    6.63    0.77
   7  -5 -13    1.80    0.54
   9  -5 -13   29.06    1.89
  11  -5 -13    7.03    0.89
  13  -5 -13   16.49    1.37
  15  -5 -13    4.10    0.76
  17  -5 -13   -0.38    0.46
  19  -5 -13    0.59    0.55
  21  -5 -13    7.92    1.08
  23  -5 -13    1.50    0.73
  25  -5 -13    1.19    0.76
 -24  -4 -13    1.24    0.85
 -22  -4 -13    1.14    0.80
 -20  -4 -13    3.14    0.90
 -16  -4 -13   29.39    1.99
 -14  -4 -13    0.86    0.59
 -12  -4 -13    0.74    0.57
 -10  -4 -13    2.99    0.66
  -8  -4 -13    4.15    0.71
  -6  -4 -13   38.28    2.22
  -4  -4 -13   16.88    0.74
  -2  -4 -13   10.95    0.57
   0  -4 -13    0.14    0.26
   2  -4 -13   44.05    2.18
   4  -4 -13   30.74    1.73
   6  -4 -13    3.20    0.57
   8  -4 -13    0.33    0.41
  10  -4 -13    8.55    0.89
  12  -4 -13    2.17    0.58
  14  -4 -13    6.44    0.86
  16  -4 -13    1.34    0.58
  18  -4 -13   11.09    1.12
  20  -4 -13    0.95    0.60
  22  -4 -13   -0.26    0.54
  24  -4 -13    6.09    1.02
  26  -4 -13    0.92    0.71
  28  -4 -13    5.10    1.04
 -25  -3 -13    4.39    1.13
 -23  -3 -13    0.83    0.73
 -21  -3 -13    4.84    1.01
 -19  -3 -13    0.66    0.66
 -17  -3 -13   52.20    3.09
 -13  -3 -13   77.86    3.87
 -11  -3 -13    0.34    0.51
  -9  -3 -13  138.16    4.42
  -7  -3 -13    0.41    0.17
  -5  -3 -13   12.26    0.57
  -3  -3 -13    0.28    0.18
  -1  -3 -13    0.23    0.19
   1  -3 -13   25.47    1.41
   3  -3 -13    5.69    0.57
   5  -3 -13   -0.04    0.30
   7  -3 -13    2.25    0.47
   9  -3 -13   49.42    2.80
  11  -3 -13    4.80    0.68
  13  -3 -13    8.93    0.93
  15  -3 -13   26.36    1.68
  17  -3 -13    0.36    0.52
  19  -3 -13   30.00    1.99
  21  -3 -13   -0.14    0.50
  23  -3 -13    3.16    0.77
  25  -3 -13    2.54    0.77
  27  -3 -13    2.58    0.81
  29  -3 -13    0.10    0.65
 -26  -2 -13    1.00    0.81
 -24  -2 -13    0.19    0.68
 -22  -2 -13    1.56    0.79
 -20  -2 -13    0.92    0.62
 -18  -2 -13   11.64    1.21
 -16  -2 -13    1.51    0.70
 -14  -2 -13    2.48    0.68
 -12  -2 -13    4.65    0.73
 -10  -2 -13    3.14    0.30
  -8  -2 -13   37.03    1.35
  -6  -2 -13    7.74    0.42
  -4  -2 -13  112.82    3.61
  -2  -2 -13    9.47    0.49
   0  -2 -13   88.31    2.84
   2  -2 -13   95.10    4.29
   4  -2 -13  231.79   11.07
   6  -2 -13   56.86    3.02
   8  -2 -13   31.03    1.85
  10  -2 -13   16.39    1.20
  12  -2 -13    1.01    0.45
  14  -2 -13   11.85    1.02
  16  -2 -13   12.73    1.13
  18  -2 -13    2.35    0.64
  20  -2 -13    7.88    0.97
  22  -2 -13    4.73    0.82
  24  -2 -13    6.43    0.94
  26  -2 -13    7.87    1.07
  28  -2 -13    0.74    0.65
 -27  -1 -13    1.01    0.77
 -25  -1 -13    3.85    1.06
 -23  -1 -13    0.08    0.58
 -21  -1 -13   -0.12    0.59
 -19  -1 -13   27.76    2.02
 -17  -1 -13   31.27    2.14
 -15  -1 -13   19.93    1.47
 -13  -1 -13   -0.38    0.51
 -11  -1 -13   11.58    1.01
  -9  -1 -13   64.38    2.22
  -7  -1 -13   11.78    0.58
  -5  -1 -13    4.89    0.33
  -3  -1 -13   44.85    1.55
  -1  -1 -13   86.51    2.84
   1  -1 -13   53.81    1.80
   3  -1 -13   68.71    3.46
   5  -1 -13    1.15    0.37
   7  -1 -13    0.16    0.37
   9  -1 -13    6.86    0.71
  11  -1 -13    3.80    0.59
  13  -1 -13    2.85    0.57
  15  -1 -13   19.28    1.31
  17  -1 -13   13.99    1.17
  19  -1 -13   13.43    1.15
  21  -1 -13    1.07    0.53
  23  -1 -13    5.52    0.84
  25  -1 -13   10.35    1.11
  27  -1 -13    1.99    0.68
 -26   0 -13    0.25    0.67
 -24   0 -13   -0.22    0.58
 -22   0 -13    0.63    0.58
 -20   0 -13   -0.78    0.46
 -18   0 -13    0.65    0.55
 -16   0 -13    1.08    0.56
 -14   0 -13   -0.70    0.42
 -12   0 -13   -0.25    0.44
 -10   0 -13    0.08    0.47
  -8   0 -13    0.19    0.20
  -6   0 -13    0.09    0.18
  -4   0 -13    0.01    0.19
  -2   0 -13    0.14    0.18
   2   0 -13   -0.24    0.25
   4   0 -13   -0.21    0.30
   6   0 -13   -0.14    0.29
   8   0 -13   -0.14    0.31
  10   0 -13   -0.14    0.16
  12   0 -13    0.12    0.19
  14   0 -13    0.04    0.19
  16   0 -13    0.21    0.21
  18   0 -13    0.14    0.21
  20   0 -13   -0.36    0.22
  22   0 -13    0.26    0.43
  24   0 -13    0.23    0.46
 -27   1 -13    0.24    0.73
 -25   1 -13    4.75    1.11
 -23   1 -13   -0.05    0.64
 -21   1 -13   -0.14    0.58
 -19   1 -13   31.14    2.11
 -17   1 -13   34.11    2.21
 -15   1 -13   19.82    1.52
 -13   1 -13    0.56    0.49
 -11   1 -13   12.29    1.05
  -9   1 -13   63.97    2.26
  -7   1 -13   10.80    0.60
  -5   1 -13    4.56    0.36
  -3   1 -13   46.14    1.59
  -1   1 -13   86.35    2.88
   1   1 -13   52.29    1.82
   3   1 -13   72.04    3.47
   5   1 -13    1.48    0.23
   7   1 -13    0.62    0.19
   9   1 -13    6.82    0.42
  11   1 -13    3.10    0.30
  13   1 -13    2.83    0.30
  15   1 -13   17.52    0.78
  17   1 -13   14.34    0.71
  19   1 -13   11.61    0.66
  21   1 -13    0.52    0.26
  23   1 -13    5.25    0.65
 -26   2 -13    2.12    0.90
 -24   2 -13    0.71    0.70
 -22   2 -13    3.31    0.89
 -20   2 -13    0.06    0.58
 -18   2 -13   11.93    1.22
 -16   2 -13    0.87    0.57
 -14   2 -13    2.27    0.64
 -12   2 -13    3.52    0.71
 -10   2 -13    3.11    0.65
  -8   2 -13   37.26    2.12
  -6   2 -13    6.68    0.49
  -4   2 -13  106.20    3.68
  -2   2 -13    9.67    0.55
   0   2 -13   83.66    2.89
   2   2 -13   92.15    2.45
   4   2 -13  247.09    7.72
   6   2 -13   63.75    2.05
   8   2 -13   33.50    1.22
  10   2 -13   18.22    0.76
  12   2 -13    0.91    0.25
  14   2 -13   11.24    0.60
  16   2 -13   12.51    0.65
  18   2 -13    1.23    0.28
  20   2 -13    6.16    0.69
  22   2 -13    4.51    0.63
  24   2 -13    3.54    0.64
 -25   3 -13    3.27    1.05
 -23   3 -13    0.48    0.71
 -21   3 -13    3.77    0.95
 -19   3 -13    0.98    0.68
 -17   3 -13   55.48    3.16
 -15   3 -13   17.41    1.44
 -13   3 -13   72.29    3.93
 -11   3 -13    0.06    0.47
  -9   3 -13  132.85    6.59
  -7   3 -13    0.15    0.46
  -5   3 -13   11.20    0.68
  -3   3 -13   -0.14    0.26
  -1   3 -13    0.57    0.28
   1   3 -13   26.13    1.02
   3   3 -13    5.57    0.32
   5   3 -13   -0.18    0.20
   7   3 -13    2.00    0.28
   9   3 -13   55.31    1.86
  11   3 -13    4.97    0.39
  13   3 -13    8.45    0.50
  15   3 -13   25.68    1.45
  17   3 -13   -0.19    0.29
  19   3 -13   32.14    1.78
  21   3 -13   -0.21    0.35
  23   3 -13    2.20    0.54
  25   3 -13    1.09    0.53
  27   3 -13    0.98    0.51
 -24   4 -13    1.97    0.91
 -22   4 -13    1.34    0.72
 -20   4 -13    3.23    0.88
 -18   4 -13   -0.44    0.49
 -16   4 -13   33.19    2.11
 -14   4 -13    0.85    0.54
 -12   4 -13    0.90    0.52
 -10   4 -13    4.24    0.71
  -8   4 -13    5.04    0.74
  -6   4 -13   38.58    2.30
  -4   4 -13   14.15    1.20
  -2   4 -13   11.17    0.51
   0   4 -13    0.09    0.24
   2   4 -13   40.48    1.25
   4   4 -13   31.12    1.17
   6   4 -13    3.23    0.33
   8   4 -13    0.77    0.25
  10   4 -13    8.86    0.51
  12   4 -13    2.00    0.44
  14   4 -13    6.33    0.67
  16   4 -13    0.78    0.37
  18   4 -13    8.59    0.85
  20   4 -13    0.57    0.41
  22   4 -13   -0.08    0.38
  24   4 -13    5.76    0.81
  26   4 -13    0.11    0.44
  28   4 -13    5.88    0.91
 -23   5 -13    0.15    0.70
 -21   5 -13   -0.24    0.62
 -19   5 -13    0.43    0.59
 -17   5 -13    1.98    0.72
 -15   5 -13    0.03    0.48
 -13   5 -13    6.95    0.94
 -11   5 -13   11.87    1.14
  -9   5 -13    5.64    0.83
  -7   5 -13    0.18    0.46
  -5   5 -13   12.06    1.08
  -3   5 -13   -0.52    0.24
   1   5 -13   -0.04    0.21
   3   5 -13    9.07    0.46
   5   5 -13    7.52    0.48
   7   5 -13    2.03    0.29
   9   5 -13   33.99    1.75
  11   5 -13    6.93    0.73
  13   5 -13   17.29    1.17
  15   5 -13    3.00    0.55
  17   5 -13    0.19    0.34
  19   5 -13    0.57    0.37
  21   5 -13    6.10    0.80
  23   5 -13    0.77    0.50
  25   5 -13    1.43    0.55
  27   5 -13   -0.13    0.46
 -22   6 -13    1.35    0.73
 -20   6 -13    9.98    1.38
 -18   6 -13   11.74    1.38
 -16   6 -13   -0.21    0.52
 -14   6 -13    1.16    0.62
 -12   6 -13    6.51    0.93
 -10   6 -13    0.07    0.48
  -8   6 -13   32.48    2.11
  -6   6 -13    0.13    0.49
  -4   6 -13    3.54    0.70
   0   6 -13    2.81    0.38
   2   6 -13    0.64    0.29
   4   6 -13    4.55    0.55
   6   6 -13    0.72    0.36
   8   6 -13    0.38    0.33
  10   6 -13    0.64    0.37
  12   6 -13    0.82    0.37
  14   6 -13   11.33    0.97
  16   6 -13    0.98    0.41
  18   6 -13   -0.32    0.30
  20   6 -13    8.83    0.95
  22   6 -13   -0.25    0.38
  24   6 -13    7.27    0.97
 -19   7 -13    0.44    0.74
 -17   7 -13    1.49    0.77
 -15   7 -13    5.76    1.05
 -13   7 -13    1.26    0.67
 -11   7 -13   19.70    1.64
  -9   7 -13   25.61    1.90
  -7   7 -13    1.96    0.63
  -5   7 -13    0.85    0.53
  -3   7 -13    0.21    0.41
  -1   7 -13    0.62    0.49
   1   7 -13   -0.16    0.23
   3   7 -13    0.49    0.28
   5   7 -13    0.13    0.32
   7   7 -13    1.43    0.45
   9   7 -13    2.16    0.54
  11   7 -13    0.36    0.38
  13   7 -13    0.75    0.41
  15   7 -13   -0.45    0.35
  17   7 -13    2.35    0.59
  19   7 -13    0.16    0.39
  21   7 -13    0.50    0.48
 -16   8 -13    2.78    0.86
 -14   8 -13    3.02    0.90
 -12   8 -13    0.45    0.63
 -10   8 -13    0.69    0.70
  -8   8 -13    4.85    0.94
  -4   8 -13    5.08    0.91
  -2   8 -13    0.33    0.54
   0   8 -13    0.96    0.58
   2   8 -13    0.81    0.56
   4   8 -13    7.00    0.77
   6   8 -13    0.79    0.43
   8   8 -13    0.06    0.36
  10   8 -13   13.97    1.16
  12   8 -13   -0.56    0.30
  14   8 -13    7.42    0.94
  16   8 -13    9.02    1.00
  18   8 -13    4.35    0.81
 -13   9 -13    0.35    0.70
 -11   9 -13   -0.05    0.65
  -9   9 -13    8.02    1.23
  -7   9 -13   -0.60    0.51
  -5   9 -13    0.76    0.62
  -3   9 -13   10.24    1.25
  -1   9 -13   -0.08    0.49
   1   9 -13    4.32    0.92
   7   9 -13    0.34    0.45
   9   9 -13    0.09    0.44
  11   9 -13    3.55    0.72
  13   9 -13   -0.56    0.41
  15   9 -13    4.66    0.82
  -6  10 -13   10.25    1.36
  -4  10 -13    4.06    0.95
  -2  10 -13    5.09    1.05
   0  10 -13    4.35    0.98
  10  10 -13    0.45    0.53
  12  10 -13   -0.18    0.49
  -6 -10 -12    1.04    0.84
  -4 -10 -12    0.62    0.79
  -2 -10 -12    2.07    0.89
   0 -10 -12    0.62    0.77
   2 -10 -12    0.82    0.81
 -13  -9 -12    0.82    0.75
 -11  -9 -12    0.53    0.76
  -9  -9 -12   -0.25    0.65
  -7  -9 -12    8.29    1.20
  -5  -9 -12    1.53    0.74
  -3  -9 -12    6.01    1.05
  -1  -9 -12    6.05    1.05
   1  -9 -12    0.92    0.70
  11  -9 -12   -0.18    0.51
  13  -9 -12    5.16    0.94
  15  -9 -12    1.24    0.72
  17  -9 -12    7.25    1.15
 -16  -8 -12    0.66    0.74
 -14  -8 -12    6.29    1.07
 -12  -8 -12    0.67    0.63
 -10  -8 -12    5.81    1.01
  -8  -8 -12    7.32    1.03
  -6  -8 -12    3.83    0.83
  -4  -8 -12    8.61    1.14
  -2  -8 -12    0.18    0.59
   0  -8 -12    4.20    0.85
   8  -8 -12   22.29    1.57
  10  -8 -12   11.24    1.19
  12  -8 -12    5.66    0.91
  14  -8 -12    2.33    0.72
  16  -8 -12    0.45    0.63
  18  -8 -12   -0.81    0.50
  20  -8 -12    0.63    0.66
 -19  -7 -12   -0.08    0.69
 -17  -7 -12   -0.48    0.59
 -15  -7 -12    1.71    0.75
 -13  -7 -12    3.25    0.83
 -11  -7 -12   18.67    1.56
  -9  -7 -12    7.51    0.99
  -7  -7 -12    0.07    0.53
  -5  -7 -12    0.03    0.50
  -3  -7 -12   17.02    1.42
  -1  -7 -12   10.31    1.09
   5  -7 -12    0.57    0.48
   7  -7 -12    1.17    0.55
   9  -7 -12    3.90    0.76
  11  -7 -12    0.95    0.60
  13  -7 -12    6.07    0.90
  15  -7 -12    0.95    0.61
  17  -7 -12    1.87    0.73
  19  -7 -12   14.11    1.47
  21  -7 -12   -0.35    0.52
 -20  -6 -12    4.60    1.04
 -18  -6 -12    5.88    1.03
 -16  -6 -12    3.75    0.88
 -14  -6 -12    6.97    0.99
 -12  -6 -12    7.54    0.97
 -10  -6 -12   47.54    2.87
  -8  -6 -12    1.53    0.61
  -6  -6 -12    1.58    0.62
  -4  -6 -12   32.55    2.08
  -2  -6 -12    1.06    0.57
   0  -6 -12   58.93    2.80
   2  -6 -12   21.55    1.31
   4  -6 -12    2.18    0.56
   6  -6 -12   26.95    1.71
   8  -6 -12    7.19    0.90
  10  -6 -12   -0.03    0.48
  12  -6 -12    5.14    0.82
  14  -6 -12   19.66    1.54
  16  -6 -12    0.96    0.59
  18  -6 -12    2.18    0.71
  20  -6 -12    0.15    0.57
  22  -6 -12    5.86    1.02
  24  -6 -12    2.36    0.85
 -23  -5 -12   -0.16    0.80
 -21  -5 -12    1.50    0.91
 -19  -5 -12    0.47    0.65
 -17  -5 -12    9.79    1.21
 -15  -5 -12    2.69    0.73
 -13  -5 -12   13.77    1.26
 -11  -5 -12   15.74    1.35
  -9  -5 -12    9.48    1.00
  -7  -5 -12   11.21    1.03
  -5  -5 -12   -0.06    0.46
  -3  -5 -12   19.20    1.36
  -1  -5 -12   25.37    1.05
   1  -5 -12   13.30    0.94
   3  -5 -12  182.68    7.87
   5  -5 -12   15.54    1.09
   7  -5 -12   53.85    2.91
   9  -5 -12   41.08    2.39
  11  -5 -12    5.49    0.83
  13  -5 -12    1.27    0.58
  15  -5 -12   16.62    1.35
  17  -5 -12    1.58    0.63
  19  -5 -12    5.07    0.89
  21  -5 -12    1.38    0.67
  23  -5 -12    1.63    0.72
  25  -5 -12    1.60    0.78
 -24  -4 -12    3.00    0.99
 -22  -4 -12    8.13    1.29
 -20  -4 -12    0.85    0.70
 -16  -4 -12   24.77    1.79
 -14  -4 -12   46.21    2.66
 -12  -4 -12    1.51    0.61
 -10  -4 -12   54.76    3.07
  -8  -4 -12    4.89    0.73
  -6  -4 -12   18.35    1.29
  -4  -4 -12    0.01    0.14
  -2  -4 -12   73.17    2.47
   0  -4 -12   26.76    1.43
   2  -4 -12   21.58    1.24
   4  -4 -12   26.95    1.47
   6  -4 -12   29.82    1.70
   8  -4 -12   26.21    1.59
  10  -4 -12    8.99    0.92
  12  -4 -12    0.92    0.52
  14  -4 -12   47.82    2.71
  16  -4 -12    9.29    1.02
  18  -4 -12    5.68    0.87
  20  -4 -12    4.40    0.87
  22  -4 -12    1.12    0.66
  24  -4 -12    0.70    0.64
  26  -4 -12    1.37    0.81
  28  -4 -12    1.98    0.82
 -25  -3 -12    0.61    0.79
 -23  -3 -12    0.49    0.71
 -21  -3 -12   -0.40    0.64
 -19  -3 -12    0.05    0.62
 -17  -3 -12    4.73    0.89
 -13  -3 -12    5.90    0.84
 -11  -3 -12    2.26    0.59
  -9  -3 -12   17.09    0.72
  -7  -3 -12   12.90    0.61
  -5  -3 -12   21.80    0.89
  -3  -3 -12  100.36    3.28
  -1  -3 -12   13.77    0.63
   1  -3 -12   15.49    0.92
   3  -3 -12   71.86    3.38
   5  -3 -12    5.43    0.60
   7  -3 -12   14.66    1.04
   9  -3 -12    0.30    0.40
  11  -3 -12    3.13    0.59
  13  -3 -12    6.05    0.80
  15  -3 -12    4.10    0.70
  17  -3 -12    4.23    0.78
  19  -3 -12    8.25    1.02
  21  -3 -12    0.28    0.56
  23  -3 -12    9.19    1.10
  25  -3 -12    1.30    0.65
  27  -3 -12    4.42    0.94
  29  -3 -12    0.43    0.66
 -26  -2 -12    0.63    0.80
 -24  -2 -12    0.43    0.76
 -22  -2 -12    0.42    0.64
 -20  -2 -12    0.07    0.54
 -18  -2 -12    1.84    0.70
 -16  -2 -12    2.31    0.75
 -14  -2 -12    0.36    0.58
 -12  -2 -12    0.23    0.55
 -10  -2 -12   30.89    1.14
  -8  -2 -12   42.87    1.56
  -6  -2 -12    9.29    0.46
  -4  -2 -12    6.28    0.36
  -2  -2 -12   30.76    1.12
   0  -2 -12    9.56    0.49
   2  -2 -12    4.68    0.47
   4  -2 -12   14.91    1.00
   6  -2 -12   37.89    2.03
   8  -2 -12   61.22    3.20
  10  -2 -12   -0.12    0.37
  12  -2 -12    4.06    0.62
  14  -2 -12   16.85    1.28
  16  -2 -12    1.29    0.56
  18  -2 -12   38.33    2.39
  20  -2 -12    4.04    0.77
  22  -2 -12   16.55    1.39
  24  -2 -12   19.66    1.61
  26  -2 -12    9.51    1.17
  28  -2 -12   14.93    1.47
 -27  -1 -12    7.22    1.26
 -25  -1 -12    1.20    0.76
 -23  -1 -12    0.92    0.74
 -21  -1 -12    1.64    0.71
 -19  -1 -12   16.10    1.42
 -17  -1 -12    0.70    0.62
 -15  -1 -12   11.59    1.12
 -13  -1 -12   10.05    1.00
 -11  -1 -12    6.50    0.79
  -9  -1 -12  108.07    3.66
  -7  -1 -12   72.09    2.38
  -5  -1 -12   36.98    1.33
  -3  -1 -12    3.01    0.26
  -1  -1 -12   97.25    3.08
   1  -1 -12   58.62    1.96
   3  -1 -12   44.67    2.28
   5  -1 -12    0.58    0.32
   7  -1 -12   40.63    2.21
   9  -1 -12   10.39    0.92
  11  -1 -12   32.15    1.86
  13  -1 -12    3.10    0.58
  15  -1 -12    0.22    0.46
  17  -1 -12    3.61    0.68
  19  -1 -12    0.88    0.55
  21  -1 -12   55.68    3.10
  23  -1 -12    1.15    0.57
  25  -1 -12   11.45    1.17
  27  -1 -12    1.29    0.61
 -28   0 -12    4.67    1.16
 -26   0 -12   22.04    2.05
 -24   0 -12    0.40    0.66
 -22   0 -12   32.64    2.29
 -20   0 -12    0.87    0.57
 -18   0 -12   10.09    1.15
 -16   0 -12   49.22    2.96
 -14   0 -12    0.78    0.51
 -12   0 -12    0.73    0.52
 -10   0 -12    2.73    0.61
  -8   0 -12   73.97    2.57
  -6   0 -12   23.50    0.92
  -4   0 -12   13.17    0.59
  -2   0 -12    6.16    0.37
   0   0 -12  203.52    6.53
   2   0 -12  312.91   13.95
   4   0 -12    3.06    0.42
   6   0 -12   37.26    1.91
   8   0 -12    1.45    0.39
  10   0 -12   55.01    1.85
  12   0 -12  158.83    5.04
  14   0 -12    1.75    0.27
  16   0 -12    5.62    0.43
  18   0 -12    1.13    0.28
  20   0 -12    6.41    0.49
  22   0 -12    2.47    0.60
  24   0 -12    8.06    0.94
 -27   1 -12    7.04    1.28
 -25   1 -12    1.06    0.72
 -23   1 -12    1.07    0.75
 -21   1 -12    1.54    0.67
 -19   1 -12   18.10    1.47
 -17   1 -12    2.03    0.66
 -15   1 -12   11.12    1.11
 -13   1 -12    8.18    0.94
 -11   1 -12    5.69    0.73
  -9   1 -12  114.55    5.37
  -7   1 -12   69.09    2.41
  -5   1 -12   37.04    1.37
  -3   1 -12    3.62    0.31
  -1   1 -12   89.82    3.11
   1   1 -12   56.90    1.97
   3   1 -12   48.07    2.29
   5   1 -12    0.32    0.18
   7   1 -12   43.20    1.50
   9   1 -12   12.04    0.56
  11   1 -12   32.55    1.20
  13   1 -12    2.66    0.29
  15   1 -12    0.18    0.20
  17   1 -12    3.43    0.36
  19   1 -12    0.78    0.26
  21   1 -12   58.41    2.06
  23   1 -12    1.28    0.41
 -26   2 -12    1.56    0.82
 -24   2 -12    0.68    0.79
 -22   2 -12    1.02    0.65
 -20   2 -12    0.05    0.52
 -18   2 -12    2.96    0.74
 -16   2 -12    2.88    0.74
 -14   2 -12   -0.19    0.42
 -12   2 -12   -0.03    0.44
 -10   2 -12   27.51    1.78
  -8   2 -12   44.61    2.44
  -6   2 -12    9.29    0.55
  -4   2 -12    5.57    0.41
  -2   2 -12   29.04    1.17
   0   2 -12    8.87    0.52
   2   2 -12    3.69    0.25
   4   2 -12   14.63    0.97
   6   2 -12   39.23    1.35
   8   2 -12   65.47    2.14
  10   2 -12   -0.08    0.16
  12   2 -12    2.89    0.30
  14   2 -12   18.22    0.79
  16   2 -12    1.80    0.29
  18   2 -12   42.51    2.14
  20   2 -12    3.54    0.55
  22   2 -12   16.88    1.21
  24   2 -12   23.34    1.47
 -25   3 -12    0.98    0.75
 -23   3 -12   -0.19    0.62
 -21   3 -12    0.67    0.63
 -19   3 -12    1.29    0.65
 -17   3 -12    2.93    0.75
 -13   3 -12    6.19    0.85
 -11   3 -12    1.35    0.53
  -9   3 -12   15.34    1.23
  -7   3 -12   12.61    1.10
  -5   3 -12   22.32    1.00
  -3   3 -12   96.91    3.37
  -1   3 -12   13.80    0.53
   1   3 -12   14.87    0.56
   3   3 -12   70.48    1.91
   5   3 -12    5.18    0.36
   7   3 -12   14.83    0.67
   9   3 -12    1.11    0.23
  11   3 -12    2.37    0.30
  13   3 -12    5.94    0.42
  15   3 -12    2.35    0.44
  17   3 -12    4.38    0.58
  19   3 -12    9.79    0.86
  21   3 -12    0.52    0.40
  23   3 -12    7.16    0.81
  25   3 -12   -0.26    0.37
  27   3 -12    4.49    0.80
 -24   4 -12    3.21    0.99
 -22   4 -12   11.95    1.39
 -20   4 -12    0.96    0.68
 -18   4 -12   29.37    2.05
 -16   4 -12   23.95    1.81
 -14   4 -12   43.23    2.67
 -12   4 -12    2.87    0.65
 -10   4 -12   56.70    3.15
  -8   4 -12    5.27    0.75
  -6   4 -12   16.37    1.31
  -4   4 -12   -0.59    0.45
  -2   4 -12   70.02    2.02
   0   4 -12   26.05    1.03
   2   4 -12   20.74    0.73
   4   4 -12   24.18    0.97
   6   4 -12   29.04    1.10
   8   4 -12   27.10    1.01
  10   4 -12   10.34    0.54
  12   4 -12    0.69    0.33
  14   4 -12   53.24    2.49
  16   4 -12   10.25    0.84
  18   4 -12    5.07    0.68
  20   4 -12    6.17    0.74
  22   4 -12    1.41    0.49
  24   4 -12    2.65    0.63
  26   4 -12    0.57    0.49
  28   4 -12    2.05    0.68
 -23   5 -12    0.90    0.66
 -21   5 -12    1.51    0.74
 -19   5 -12    0.19    0.57
 -17   5 -12   12.15    1.31
 -15   5 -12    3.47    0.74
 -13   5 -12   14.68    1.29
 -11   5 -12   14.81    1.30
  -9   5 -12   10.98    1.08
  -7   5 -12    9.24    1.01
  -5   5 -12   -0.13    0.43
  -3   5 -12   16.64    0.83
  -1   5 -12   25.37    1.35
   1   5 -12   13.57    0.72
   3   5 -12  169.36    4.46
   5   5 -12   13.35    0.66
   7   5 -12   58.07    1.92
   9   5 -12   44.50    2.19
  11   5 -12    6.17    0.66
  13   5 -12    1.26    0.43
  15   5 -12   17.58    1.17
  17   5 -12    1.43    0.45
  19   5 -12    3.32    0.63
  21   5 -12    1.77    0.55
  23   5 -12    1.39    0.53
  25   5 -12    1.07    0.52
  27   5 -12    1.14    0.58
 -22   6 -12    0.28    0.63
 -20   6 -12    6.91    1.18
 -18   6 -12    6.93    1.14
 -16   6 -12    2.90    0.80
 -14   6 -12    7.21    1.03
 -12   6 -12    6.61    0.96
 -10   6 -12   53.27    3.04
  -8   6 -12    1.10    0.56
  -6   6 -12    3.37    0.73
  -4   6 -12   33.07    2.16
  -2   6 -12    0.37    0.31
   0   6 -12   53.77    2.00
   2   6 -12   17.59    0.90
   4   6 -12    1.40    0.41
   6   6 -12   27.25    1.53
   8   6 -12    6.69    0.69
  10   6 -12    0.40    0.34
  12   6 -12    5.78    0.68
  14   6 -12   20.98    1.37
  16   6 -12    1.50    0.47
  18   6 -12    3.43    0.64
  20   6 -12   -0.18    0.35
  22   6 -12    4.40    0.78
  24   6 -12    5.36    0.86
 -19   7 -12    0.13    0.69
 -17   7 -12    0.44    0.68
 -15   7 -12    2.22    0.77
 -13   7 -12    3.39    0.87
 -11   7 -12   18.59    1.58
  -9   7 -12    6.81    1.00
  -7   7 -12   -0.01    0.45
  -5   7 -12   -0.37    0.41
  -3   7 -12   17.77    1.43
  -1   7 -12   10.23    1.09
   1   7 -12    4.70    0.46
   3   7 -12    5.03    0.50
   5   7 -12    0.67    0.37
   7   7 -12    0.54    0.37
   9   7 -12    4.35    0.63
  11   7 -12    1.32    0.45
  13   7 -12    4.20    0.68
  15   7 -12    3.03    0.62
  17   7 -12    2.12    0.59
  19   7 -12   15.45    1.31
  21   7 -12    0.55    0.48
 -16   8 -12    0.25    0.65
 -14   8 -12    5.47    1.07
 -12   8 -12    0.10    0.62
 -10   8 -12    8.62    1.16
  -8   8 -12    6.65    1.08
  -4   8 -12    9.68    1.16
  -2   8 -12    0.48    0.50
   0   8 -12    4.03    0.83
   2   8 -12    5.07    0.85
   4   8 -12    8.73    0.85
   6   8 -12    0.95    0.43
   8   8 -12   20.33    1.37
  10   8 -12   13.31    1.10
  12   8 -12    4.22    0.71
  14   8 -12    3.08    0.67
  16   8 -12    0.98    0.53
  18   8 -12    0.13    0.47
 -13   9 -12    2.50    0.93
 -11   9 -12    1.04    0.73
  -9   9 -12    0.67    0.72
  -7   9 -12    7.98    1.15
  -5   9 -12    1.46    0.67
  -3   9 -12    3.35    0.86
  -1   9 -12    5.69    0.99
   1   9 -12    0.30    0.53
   5   9 -12    7.74    0.88
   7   9 -12    0.77    0.48
   9   9 -12    2.49    0.65
  11   9 -12    0.11    0.45
  13   9 -12    3.84    0.77
  15   9 -12    1.75    0.61
  -6  10 -12    0.70    0.67
  -4  10 -12    1.34    0.73
  -2  10 -12    0.40    0.65
   0  10 -12    0.09    0.62
  10  10 -12   -0.01    0.51
  12  10 -12   -0.52    0.49
  -6 -10 -11    5.73    1.16
  -4 -10 -11    0.15    0.70
  -2 -10 -11    0.21    0.79
   0 -10 -11    2.41    0.94
   2 -10 -11    0.82    0.78
 -13  -9 -11    1.79    0.85
 -11  -9 -11    4.41    1.02
  -9  -9 -11    0.61    0.69
  -7  -9 -11   -0.69    0.57
  -5  -9 -11    6.50    1.08
  -3  -9 -11    1.29    0.74
  -1  -9 -11    1.76    0.79
   1  -9 -11   14.66    1.53
  11  -9 -11    0.51    0.62
  13  -9 -11    3.57    0.84
  15  -9 -11    3.78    0.92
  17  -9 -11    1.38    0.76
 -16  -8 -11    4.97    1.05
 -14  -8 -11    1.56    0.77
 -12  -8 -11    1.38    0.73
 -10  -8 -11    1.97    0.73
  -8  -8 -11    8.53    1.10
  -6  -8 -11   12.17    1.27
  -4  -8 -11    2.73    0.80
  -2  -8 -11    2.64    0.76
   0  -8 -11    1.37    0.68
   8  -8 -11    4.97    0.84
  10  -8 -11    0.65    0.58
  12  -8 -11    4.61    0.88
  14  -8 -11    5.28    0.92
  16  -8 -11    0.72    0.67
  18  -8 -11    4.01    0.92
  20  -8 -11    4.97    1.04
 -19  -7 -11    5.65    1.13
 -17  -7 -11    0.78    0.68
 -15  -7 -11    3.66    0.88
 -13  -7 -11    1.44    0.68
 -11  -7 -11    0.28    0.58
  -9  -7 -11   17.39    1.52
  -7  -7 -11    1.49    0.64
  -5  -7 -11    4.46    0.81
  -3  -7 -11    2.71    0.70
  -1  -7 -11    1.03    0.60
   3  -7 -11    1.89    0.54
   5  -7 -11   42.52    2.39
   7  -7 -11   17.06    1.33
   9  -7 -11   65.63    3.44
  11  -7 -11    0.10    0.51
  13  -7 -11    0.12    0.53
  15  -7 -11    5.69    0.91
  17  -7 -11    0.59    0.63
  19  -7 -11    0.81    0.64
  21  -7 -11    2.17    0.82
 -20  -6 -11    3.10    0.93
 -18  -6 -11    2.97    0.87
 -16  -6 -11    2.07    0.74
 -14  -6 -11    7.03    0.97
 -12  -6 -11    9.29    1.06
 -10  -6 -11   63.67    3.46
  -8  -6 -11    1.85    0.63
  -6  -6 -11    2.14    0.68
  -4  -6 -11    4.58    0.78
  -2  -6 -11   10.98    1.07
   0  -6 -11   -0.31    0.33
   2  -6 -11    0.19    0.40
   4  -6 -11    2.06    0.56
   6  -6 -11    7.66    0.87
   8  -6 -11   11.89    1.12
  10  -6 -11    1.31    0.58
  12  -6 -11    1.79    0.63
  14  -6 -11    5.95    0.89
  16  -6 -11    0.47    0.56
  18  -6 -11    1.57    0.64
  20  -6 -11   -0.25    0.52
  22  -6 -11   -0.46    0.57
  24  -6 -11    1.22    0.74
 -23  -5 -11    0.58    0.85
 -21  -5 -11    2.68    0.98
 -19  -5 -11   -0.35    0.62
 -17  -5 -11    2.99    0.82
 -15  -5 -11    0.86    0.59
 -13  -5 -11   -0.15    0.51
 -11  -5 -11    1.12    0.60
  -9  -5 -11   20.52    1.47
  -7  -5 -11    0.72    0.53
  -5  -5 -11   11.87    1.06
  -3  -5 -11   20.86    0.91
  -1  -5 -11   79.66    2.78
   1  -5 -11    1.46    0.40
   3  -5 -11   66.10    3.12
   5  -5 -11   27.55    1.56
   7  -5 -11    3.78    0.67
   9  -5 -11   -0.18    0.46
  11  -5 -11   52.06    2.94
  13  -5 -11   44.80    2.60
  15  -5 -11   21.80    1.68
  17  -5 -11   25.66    1.83
  19  -5 -11    3.24    0.79
  21  -5 -11    0.23    0.58
  23  -5 -11   -0.54    0.56
  25  -5 -11    0.33    0.64
  27  -5 -11   -0.32    0.69
 -24  -4 -11    7.48    1.27
 -22  -4 -11   17.17    1.71
 -20  -4 -11    2.15    0.90
 -16  -4 -11    3.07    0.78
 -14  -4 -11    0.32    0.54
 -12  -4 -11   13.51    1.18
 -10  -4 -11    2.73    0.64
  -8  -4 -11    2.85    0.61
  -6  -4 -11    2.81    0.60
  -4  -4 -11    0.98    0.19
  -2  -4 -11   11.54    0.59
   0  -4 -11   23.74    1.33
   2  -4 -11    1.54    0.39
   4  -4 -11    8.92    0.76
   6  -4 -11  119.07    5.58
   8  -4 -11    0.10    0.41
  10  -4 -11   61.46    3.38
  12  -4 -11    5.83    0.80
  14  -4 -11   14.69    1.22
  16  -4 -11    1.09    0.56
  18  -4 -11   10.77    1.14
  20  -4 -11    0.15    0.54
  22  -4 -11   19.37    1.62
  24  -4 -11    1.93    0.76
  26  -4 -11    1.59    0.83
  28  -4 -11    4.68    1.02
 -25  -3 -11   -0.47    0.76
 -23  -3 -11    0.15    0.70
 -21  -3 -11    3.75    0.92
 -19  -3 -11    0.59    0.64
 -17  -3 -11    0.44    0.66
 -13  -3 -11    0.33    0.53
 -11  -3 -11   84.04    4.08
  -9  -3 -11   33.33    1.22
  -7  -3 -11    0.18    0.12
  -5  -3 -11   58.75    1.97
  -3  -3 -11   48.96    1.68
  -1  -3 -11    0.23    0.17
   1  -3 -11  243.51   10.78
   3  -3 -11   88.87    3.96
   5  -3 -11   40.21    2.04
   7  -3 -11   14.28    1.03
   9  -3 -11    0.08    0.38
  11  -3 -11   75.38    3.97
  13  -3 -11    2.70    0.63
  15  -3 -11    0.52    0.50
  17  -3 -11    0.47    0.54
  19  -3 -11    1.54    0.63
  21  -3 -11    5.73    0.91
  23  -3 -11    8.22    1.07
  25  -3 -11    0.24    0.61
  27  -3 -11   13.62    1.43
  29  -3 -11    4.46    0.99
 -26  -2 -11    0.57    0.77
 -24  -2 -11    0.23    0.72
 -22  -2 -11   -0.39    0.59
 -20  -2 -11    1.20    0.74
 -18  -2 -11    5.77    0.95
 -16  -2 -11    0.56    0.66
 -14  -2 -11    0.21    0.58
 -10  -2 -11   -0.66    0.41
  -8  -2 -11    2.24    0.24
  -6  -2 -11   32.23    1.16
  -4  -2 -11   19.53    0.75
  -2  -2 -11    5.32    0.34
   0  -2 -11   42.40    1.44
   2  -2 -11   13.81    0.86
   4  -2 -11   12.48    0.89
   6  -2 -11  252.02   11.74
   8  -2 -11    2.81    0.50
  10  -2 -11  118.82    5.71
  12  -2 -11    0.45    0.43
  14  -2 -11    6.49    0.77
  16  -2 -11    9.52    0.98
  20  -2 -11  124.15    6.20
  22  -2 -11   52.08    2.93
  24  -2 -11    7.45    0.99
  26  -2 -11    1.61    0.65
  28  -2 -11    2.40    0.75
 -27  -1 -11    0.74    0.79
 -25  -1 -11    0.95    0.73
 -23  -1 -11    2.75    0.88
 -21  -1 -11    1.23    0.64
 -19  -1 -11    6.49    0.99
 -17  -1 -11   13.67    1.35
 -15  -1 -11    8.37    1.00
 -13  -1 -11   14.76    1.20
 -11  -1 -11    2.49    0.61
  -9  -1 -11   17.24    0.74
  -7  -1 -11    2.03    0.25
  -5  -1 -11   48.15    1.59
  -3  -1 -11   27.03    0.99
  -1  -1 -11   59.54    1.96
   1  -1 -11  432.54   13.23
   3  -1 -11   85.72    4.11
   5  -1 -11    1.67    0.41
   7  -1 -11   11.47    0.93
   9  -1 -11   42.00    2.25
  11  -1 -11   38.39    2.11
  13  -1 -11   10.15    0.90
  15  -1 -11   16.70    0.74
  17  -1 -11    4.72    0.38
  19  -1 -11    0.41    0.53
  23  -1 -11    4.01    0.75
  25  -1 -11   12.45    1.28
  27  -1 -11    2.68    0.75
 -28   0 -11   -0.33    0.66
 -26   0 -11    1.16    0.76
 -24   0 -11    0.97    0.69
 -22   0 -11    0.56    0.62
 -20   0 -11    1.19    0.60
 -18   0 -11    0.04    0.47
 -16   0 -11   -0.07    0.52
 -14   0 -11   -0.06    0.52
 -12   0 -11    0.16    0.48
 -10   0 -11   -0.01    0.51
  -8   0 -11    0.13    0.20
  -6   0 -11   -0.09    0.17
  -4   0 -11   -0.26    0.18
  -2   0 -11   -0.11    0.17
   0   0 -11    0.43    0.14
   2   0 -11    0.06    0.24
   4   0 -11   -0.10    0.26
   6   0 -11    0.30    0.34
   8   0 -11    0.02    0.16
  10   0 -11   -0.27    0.15
  12   0 -11    0.05    0.18
  14   0 -11    0.26    0.44
  16   0 -11   -0.19    0.43
  18   0 -11    0.22    0.47
  20   0 -11   -0.08    0.41
  22   0 -11    0.40    0.43
  24   0 -11    1.15    0.51
 -27   1 -11    0.92    0.81
 -25   1 -11    1.57    0.75
 -23   1 -11    2.78    0.82
 -21   1 -11    2.66    0.76
 -19   1 -11    7.73    1.04
 -17   1 -11   15.02    1.37
 -15   1 -11   10.25    1.09
 -13   1 -11   13.37    1.16
 -11   1 -11    2.07    0.58
  -9   1 -11   16.35    1.16
  -7   1 -11    3.62    0.32
  -5   1 -11   41.61    1.61
  -3   1 -11   26.49    1.03
  -1   1 -11   56.68    1.99
   1   1 -11  407.42   13.33
   3   1 -11   87.78    4.11
   5   1 -11    1.25    0.23
   7   1 -11   12.40    0.87
   9   1 -11   42.83    1.48
  11   1 -11   39.63    1.38
  13   1 -11   10.12    0.54
  15   1 -11   15.76    0.74
  17   1 -11    4.64    0.40
  19   1 -11    0.15    0.23
  21   1 -11    4.39    0.57
  23   1 -11    4.46    0.59
 -26   2 -11    0.31    0.67
 -24   2 -11   -0.20    0.63
 -22   2 -11    0.63    0.67
 -20   2 -11    1.77    0.70
 -18   2 -11    7.80    0.97
 -16   2 -11    0.20    0.52
 -14   2 -11   -0.15    0.46
 -12   2 -11    1.14    0.53
 -10   2 -11   -0.64    0.41
  -8   2 -11    2.65    0.54
  -6   2 -11   31.50    1.23
  -4   2 -11   16.72    0.80
  -2   2 -11    4.65    0.39
   0   2 -11   39.81    1.47
   2   2 -11   13.42    0.49
   4   2 -11   12.87    0.59
   6   2 -11  261.69    8.01
   8   2 -11    2.22    0.30
  10   2 -11  123.18    3.84
  12   2 -11    0.44    0.20
  14   2 -11    4.29    0.38
  16   2 -11   10.33    0.56
  18   2 -11    4.98    0.58
  20   2 -11  132.66    5.76
  22   2 -11   51.01    2.65
  24   2 -11    8.08    0.83
 -27   3 -11    3.50    1.12
 -25   3 -11   -0.83    0.63
 -23   3 -11    0.37    0.65
 -21   3 -11    4.08    0.94
 -19   3 -11    0.29    0.52
 -17   3 -11    1.51    0.61
 -15   3 -11   46.95    2.79
 -13   3 -11    0.01    0.46
 -11   3 -11   75.67    4.13
  -9   3 -11   31.37    1.95
  -7   3 -11   -0.38    0.43
  -5   3 -11   52.38    2.99
  -3   3 -11   45.54    1.76
  -1   3 -11    0.09    0.18
   1   3 -11  235.95    6.12
   3   3 -11   81.87    2.23
   5   3 -11   39.95    1.36
   7   3 -11   15.26    0.64
   9   3 -11    0.35    0.19
  11   3 -11   83.02    2.64
  13   3 -11    2.42    0.30
  15   3 -11    0.30    0.28
  17   3 -11    0.25    0.35
  19   3 -11    1.63    0.43
  21   3 -11    6.44    0.72
  23   3 -11    8.34    0.88
  25   3 -11   -0.05    0.44
  27   3 -11   12.43    1.18
 -24   4 -11    7.79    1.25
 -22   4 -11   16.47    1.68
 -20   4 -11    3.13    0.86
 -18   4 -11    3.09    0.80
 -16   4 -11    4.39    0.80
 -14   4 -11    0.52    0.49
 -12   4 -11   12.50    1.15
 -10   4 -11    3.08    0.64
  -8   4 -11    2.59    0.59
  -6   4 -11    1.19    0.53
  -4   4 -11    0.94    0.51
  -2   4 -11   12.41    0.63
   0   4 -11   23.44    0.97
   2   4 -11    0.80    0.25
   4   4 -11    8.68    0.50
   6   4 -11  122.58    3.77
   8   4 -11    0.29    0.23
  10   4 -11   71.52    2.24
  12   4 -11    6.18    0.63
  14   4 -11   13.25    0.98
  16   4 -11    0.15    0.30
  18   4 -11   12.87    1.01
  20   4 -11    0.44    0.38
  22   4 -11   19.19    1.38
  24   4 -11    0.99    0.48
  26   4 -11    3.05    0.71
  28   4 -11    5.92    0.88
 -23   5 -11    0.31    0.67
 -21   5 -11    1.68    0.76
 -19   5 -11    0.49    0.57
 -17   5 -11    5.32    0.94
 -15   5 -11    0.87    0.53
 -13   5 -11    0.07    0.45
 -11   5 -11    0.92    0.54
  -9   5 -11   18.57    1.46
  -7   5 -11    1.76    0.54
  -5   5 -11   10.81    1.02
  -3   5 -11   20.76    0.93
  -1   5 -11   80.27    3.61
   1   5 -11    0.69    0.30
   3   5 -11   63.03    2.18
   5   5 -11   25.25    0.99
   7   5 -11    4.49    0.39
   9   5 -11   -0.09    0.27
  11   5 -11   56.84    2.72
  13   5 -11   43.77    2.35
  15   5 -11   26.05    1.54
  17   5 -11   25.40    1.60
  19   5 -11    3.39    0.61
  21   5 -11   -0.13    0.38
  23   5 -11    0.09    0.44
  25   5 -11    0.38    0.48
  27   5 -11    0.37    0.49
 -22   6 -11    4.62    1.08
 -20   6 -11    2.76    0.93
 -18   6 -11    3.35    0.92
 -16   6 -11    3.06    0.80
 -14   6 -11    7.17    1.01
 -12   6 -11    9.21    1.08
 -10   6 -11   63.05    3.58
  -8   6 -11    1.61    0.60
  -6   6 -11    2.93    0.66
  -4   6 -11    4.09    0.77
  -2   6 -11    9.47    0.76
   0   6 -11    0.45    0.28
   2   6 -11    0.04    0.25
   4   6 -11    1.42    0.42
   6   6 -11    8.00    0.71
   8   6 -11   12.80    0.96
  10   6 -11    1.09    0.39
  12   6 -11    2.24    0.50
  14   6 -11    6.54    0.74
  16   6 -11    1.34    0.47
  18   6 -11    0.84    0.44
  20   6 -11    0.32    0.43
  22   6 -11    0.50    0.46
  24   6 -11    0.24    0.47
 -19   7 -11    7.85    1.23
 -17   7 -11   -0.63    0.57
 -15   7 -11    4.22    0.95
 -13   7 -11    1.03    0.64
 -11   7 -11    0.43    0.55
  -9   7 -11   21.67    1.65
  -7   7 -11    2.40    0.70
  -5   7 -11    6.38    0.92
  -3   7 -11    3.37    0.72
  -1   7 -11    0.46    0.49
   1   7 -11    2.60    0.39
   3   7 -11    1.13    0.32
   5   7 -11   40.82    2.19
   7   7 -11   15.18    1.15
   9   7 -11   61.13    3.14
  11   7 -11    0.06    0.34
  13   7 -11    0.01    0.35
  15   7 -11    5.49    0.77
  17   7 -11    0.31    0.45
  19   7 -11    0.29    0.41
  21   7 -11    2.25    0.64
 -16   8 -11    6.32    1.12
 -14   8 -11    0.69    0.65
 -12   8 -11   -0.05    0.57
 -10   8 -11    5.03    0.96
  -8   8 -11    7.11    1.09
  -4   8 -11    1.66    0.62
  -2   8 -11    0.51    0.50
   0   8 -11   -0.47    0.37
   2   8 -11   11.96    0.76
   4   8 -11    0.10    0.35
   6   8 -11    9.08    0.90
   8   8 -11    4.84    0.70
  10   8 -11    0.99    0.46
  12   8 -11    3.63    0.68
  14   8 -11    5.36    0.81
  16   8 -11    1.30    0.54
  18   8 -11    1.77    0.63
 -13   9 -11    0.45    0.67
 -11   9 -11    3.06    0.91
  -9   9 -11    1.00    0.70
  -7   9 -11    0.58    0.60
  -5   9 -11    6.10    1.05
  -3   9 -11    0.17    0.52
  -1   9 -11    2.05    0.75
   1   9 -11   15.46    1.50
   5   9 -11    0.80    0.44
   7   9 -11    8.17    0.91
   9   9 -11   -0.10    0.43
  11   9 -11    1.81    0.56
  13   9 -11    1.80    0.60
  15   9 -11    3.66    0.77
  -8  10 -11    1.35    0.71
  -6  10 -11    4.00    1.01
  -4  10 -11    0.14    0.62
  -2  10 -11   -0.89    0.45
   0  10 -11    3.18    0.88
   8  10 -11    0.53    0.52
  10  10 -11    3.79    0.77
  12  10 -11    1.87    0.62
  -6 -10 -10   16.52    1.75
  -4 -10 -10    1.52    0.84
  -2 -10 -10    1.59    0.92
   0 -10 -10   14.44    1.64
   2 -10 -10    1.10    0.79
 -13  -9 -10   -0.32    0.71
 -11  -9 -10    0.66    0.77
  -9  -9 -10    1.21    0.77
  -7  -9 -10    0.64    0.68
  -5  -9 -10    0.46    0.65
  -3  -9 -10    1.21    0.75
  -1  -9 -10    0.08    0.63
   1  -9 -10    4.20    0.97
  11  -9 -10    2.32    0.75
  13  -9 -10    5.21    0.98
  15  -9 -10    0.90    0.73
  17  -9 -10    1.92    0.84
 -16  -8 -10    6.89    1.14
 -14  -8 -10    1.37    0.78
 -12  -8 -10    7.61    1.11
 -10  -8 -10    2.65    0.79
  -8  -8 -10    7.59    1.07
  -6  -8 -10   -0.08    0.57
  -4  -8 -10    8.10    1.09
  -2  -8 -10    3.80    0.83
   0  -8 -10    2.01    0.72
   8  -8 -10    4.75    0.85
  10  -8 -10    1.20    0.64
  12  -8 -10    1.69    0.68
  14  -8 -10    0.37    0.57
  16  -8 -10    2.87    0.83
  18  -8 -10    0.52    0.64
  20  -8 -10   -0.04    0.61
 -19  -7 -10    0.11    0.71
 -17  -7 -10    2.24    0.83
 -15  -7 -10    0.75    0.64
 -13  -7 -10    0.46    0.62
 -11  -7 -10   -0.24    0.52
  -9  -7 -10    1.17    0.62
  -7  -7 -10   27.50    1.91
  -5  -7 -10    8.52    1.06
  -3  -7 -10   33.21    2.22
  -1  -7 -10   58.46    3.32
   3  -7 -10   93.30    4.48
   5  -7 -10   -0.34    0.44
   7  -7 -10   10.49    1.02
   9  -7 -10   52.28    2.83
  11  -7 -10   13.37    1.27
  13  -7 -10    3.63    0.78
  15  -7 -10    1.22    0.62
  17  -7 -10   -0.14    0.55
  19  -7 -10   -0.50    0.54
  21  -7 -10   -0.79    0.56
 -20  -6 -10    4.54    1.00
 -16  -6 -10    1.47    0.69
 -14  -6 -10    6.44    0.96
 -12  -6 -10    7.95    1.01
 -10  -6 -10   21.74    1.63
  -8  -6 -10    5.83    0.87
  -6  -6 -10   12.41    1.11
  -4  -6 -10    8.51    0.98
  -2  -6 -10   12.43    1.15
   0  -6 -10   40.36    2.12
   2  -6 -10    0.16    0.40
   4  -6 -10    0.31    0.48
   6  -6 -10    4.58    0.72
   8  -6 -10    0.45    0.51
  10  -6 -10    2.61    0.64
  12  -6 -10    4.67    0.81
  14  -6 -10    4.98    0.82
  16  -6 -10    1.58    0.65
  18  -6 -10    4.53    0.86
  20  -6 -10   -0.85    0.47
  22  -6 -10    0.00    0.61
  24  -6 -10    3.28    0.93
 -23  -5 -10    0.19    0.82
 -19  -5 -10    1.95    0.80
 -17  -5 -10   -1.25    0.46
 -15  -5 -10    2.48    0.70
 -13  -5 -10    1.67    0.66
 -11  -5 -10    0.08    0.54
  -9  -5 -10   16.09    1.36
  -7  -5 -10   39.36    2.20
  -5  -5 -10   33.57    1.99
  -3  -5 -10    6.34    0.43
  -1  -5 -10    3.55    0.43
   1  -5 -10    0.07    0.33
   3  -5 -10    3.23    0.56
   5  -5 -10    8.03    0.80
   7  -5 -10    3.11    0.60
   9  -5 -10   30.00    1.80
  11  -5 -10    7.82    0.90
  13  -5 -10    1.52    0.59
  15  -5 -10    2.68    0.69
  17  -5 -10   10.67    1.13
  19  -5 -10    1.93    0.69
  21  -5 -10   -0.53    0.54
  23  -5 -10    4.01    0.91
  25  -5 -10    1.95    0.84
  27  -5 -10    3.99    1.05
 -26  -4 -10    1.49    0.89
 -24  -4 -10    1.28    0.88
 -22  -4 -10    6.36    1.18
 -20  -4 -10   -0.11    0.72
 -16  -4 -10   17.94    1.49
 -14  -4 -10    8.28    1.00
 -12  -4 -10    0.87    0.58
 -10  -4 -10   11.32    1.04
  -8  -4 -10   23.13    1.58
  -6  -4 -10    6.28    0.79
  -4  -4 -10    8.95    0.45
  -2  -4 -10   15.66    0.72
   0  -4 -10    1.17    0.33
   2  -4 -10   22.43    1.29
   4  -4 -10    0.86    0.40
   6  -4 -10    1.76    0.49
   8  -4 -10    0.64    0.43
  10  -4 -10    3.19    0.60
  12  -4 -10    0.14    0.46
  14  -4 -10    3.30    0.69
  16  -4 -10    5.57    0.85
  18  -4 -10    4.08    0.79
  20  -4 -10   11.46    1.25
  22  -4 -10   18.98    1.54
  24  -4 -10    0.38    0.62
  26  -4 -10   36.33    2.47
  28  -4 -10    5.78    1.09
 -27  -3 -10    3.24    1.07
 -25  -3 -10   -0.82    0.69
 -23  -3 -10    0.25    0.75
 -21  -3 -10    0.51    0.66
 -19  -3 -10    2.50    0.80
 -13  -3 -10    1.26    0.59
 -11  -3 -10    0.23    0.49
  -9  -3 -10    0.94    0.16
  -7  -3 -10    0.93    0.16
  -5  -3 -10   64.50    2.17
  -3  -3 -10    2.12    0.23
  -1  -3 -10  125.24    4.11
   1  -3 -10   36.85    1.78
   3  -3 -10   51.73    2.49
   5  -3 -10   16.73    1.06
   7  -3 -10   10.53    0.89
   9  -3 -10    8.59    0.84
  11  -3 -10    0.32    0.44
  13  -3 -10    9.00    0.93
  15  -3 -10   -0.04    0.45
  17  -3 -10    3.13    0.73
  19  -3 -10   12.37    1.19
  21  -3 -10   17.92    1.48
  23  -3 -10    0.67    0.61
  25  -3 -10    0.42    0.64
  27  -3 -10    1.27    0.69
  29  -3 -10    3.21    0.89
 -26  -2 -10    3.31    1.00
 -24  -2 -10    1.05    0.75
 -22  -2 -10    3.16    0.89
 -20  -2 -10    1.83    0.76
 -18  -2 -10    5.01    0.90
 -16  -2 -10    0.54    0.59
 -14  -2 -10    2.95    0.73
 -10  -2 -10    1.13    0.50
  -8  -2 -10   19.60    0.78
  -6  -2 -10  277.58    8.48
  -4  -2 -10    0.32    0.15
  -2  -2 -10  227.33    7.05
   0  -2 -10    0.12    0.18
   2  -2 -10    1.42    0.34
   4  -2 -10  166.76    7.19
   6  -2 -10   14.78    1.04
   8  -2 -10   81.90    4.04
  10  -2 -10    1.41    0.48
  12  -2 -10    3.59    0.62
  14  -2 -10    9.36    0.94
  16  -2 -10    4.39    0.71
  18  -2 -10    4.23    0.77
  24  -2 -10    1.03    0.63
  26  -2 -10    7.35    1.03
  28  -2 -10    6.56    1.05
 -27  -1 -10    0.54    0.77
 -25  -1 -10    8.30    1.28
 -23  -1 -10    6.72    1.07
 -21  -1 -10    2.29    0.77
 -19  -1 -10   24.46    1.91
 -17  -1 -10    7.07    0.98
 -15  -1 -10    2.37    0.70
 -13  -1 -10   15.08    1.27
 -11  -1 -10    6.48    0.77
  -9  -1 -10   11.53    0.57
  -7  -1 -10   22.81    1.14
  -5  -1 -10   12.35    0.56
  -3  -1 -10  245.75    7.68
  -1  -1 -10    0.13    0.16
   1  -1 -10   72.89    3.45
   3  -1 -10   -0.38    0.26
   5  -1 -10   73.25    3.69
   7  -1 -10    2.23    0.46
   9  -1 -10   25.02    1.52
  11  -1 -10    8.87    0.84
  13  -1 -10   19.40    1.30
  15  -1 -10   17.12    0.77
  17  -1 -10   29.88    1.21
  19  -1 -10    3.01    0.69
  21  -1 -10   18.79    1.45
  23  -1 -10    6.00    0.83
  25  -1 -10    4.17    0.80
 -28   0 -10    0.86    0.78
 -26   0 -10    1.20    0.86
 -24   0 -10    7.26    1.13
 -22   0 -10    0.44    0.58
 -20   0 -10   34.21    2.28
 -18   0 -10   39.38    2.46
 -16   0 -10   12.80    1.19
 -14   0 -10    4.14    0.74
 -12   0 -10    6.55    0.80
 -10   0 -10    9.01    0.87
  -8   0 -10    2.46    0.29
  -6   0 -10   10.29    0.53
  -4   0 -10  224.32    7.23
  -2   0 -10   14.46    0.59
   0   0 -10   32.51    1.11
   2   0 -10   62.83    3.05
   4   0 -10    0.67    0.30
   6   0 -10   51.65    2.57
   8   0 -10    2.96    0.27
  10   0 -10   -0.08    0.14
  12   0 -10   29.07    1.65
  14   0 -10   29.69    1.12
  16   0 -10    0.97    0.25
  18   0 -10   15.65    0.76
  20   0 -10    8.27    0.54
  22   0 -10   36.39    2.11
  24   0 -10   13.55    1.21
 -27   1 -10    0.49    0.71
 -25   1 -10    7.52    1.20
 -23   1 -10    6.39    1.09
 -21   1 -10    1.69    0.70
 -17   1 -10    8.11    0.99
 -15   1 -10    3.25    0.70
 -13   1 -10   15.20    1.32
 -11   1 -10    8.22    0.85
  -9   1 -10   11.71    0.96
  -7   1 -10   21.09    0.90
  -5   1 -10   12.22    0.60
  -3   1 -10  237.02    7.76
  -1   1 -10    0.27    0.17
   1   1 -10   73.37    2.47
   3   1 -10   -0.16    0.15
   5   1 -10   79.12    2.55
   7   1 -10    2.40    0.24
   9   1 -10   26.22    0.98
  11   1 -10    8.92    0.49
  13   1 -10   18.42    0.79
  15   1 -10   16.75    0.77
  17   1 -10   32.80    1.21
  19   1 -10    2.62    0.35
  21   1 -10   21.27    0.92
  23   1 -10    4.88    0.62
 -26   2 -10    1.51    0.84
 -24   2 -10    0.46    0.66
 -22   2 -10    3.95    0.92
 -20   2 -10    1.34    0.66
 -18   2 -10    3.35    0.77
 -16   2 -10    0.30    0.50
 -14   2 -10    2.83    0.63
 -12   2 -10   40.51    2.45
 -10   2 -10    1.46    0.53
  -8   2 -10   17.49    1.26
  -6   2 -10  243.72   12.37
  -4   2 -10   -0.19    0.23
  -2   2 -10  212.95    7.13
   0   2 -10    0.00    0.16
   2   2 -10    1.06    0.22
   4   2 -10  157.85    4.90
   6   2 -10   16.08    0.67
   8   2 -10   84.36    2.71
  10   2 -10    1.11    0.22
  12   2 -10    3.72    0.32
  14   2 -10   10.45    0.57
  16   2 -10    2.01    0.30
  18   2 -10    3.92    0.53
  20   2 -10    2.15    0.46
  22   2 -10    1.83    0.48
  24   2 -10    0.29    0.39
 -27   3 -10    2.78    1.04
 -25   3 -10    0.71    0.79
 -23   3 -10    1.19    0.77
 -21   3 -10    0.36    0.66
 -19   3 -10    3.77    0.83
 -15   3 -10    2.47    0.66
 -13   3 -10    1.05    0.53
 -11   3 -10    0.74    0.48
  -9   3 -10    0.95    0.47
  -7   3 -10    0.52    0.50
  -5   3 -10   58.65    3.28
  -3   3 -10    1.63    0.31
  -1   3 -10  124.05    3.35
   1   3 -10   33.51    1.03
   3   3 -10   49.39    1.40
   5   3 -10   16.85    0.68
   7   3 -10   11.45    0.54
   9   3 -10    9.44    0.49
  11   3 -10    0.24    0.19
  13   3 -10   10.12    0.54
  15   3 -10   -0.47    0.24
  17   3 -10    3.72    0.55
  19   3 -10   10.78    0.91
  21   3 -10   17.48    1.26
  23   3 -10    0.33    0.38
  25   3 -10   -0.05    0.36
  27   3 -10   -0.74    0.38
 -26   4 -10    0.79    0.81
 -24   4 -10    2.37    0.89
 -22   4 -10    5.71    1.11
 -20   4 -10    1.46    0.68
 -18   4 -10    1.78    0.69
 -16   4 -10   18.54    1.47
 -14   4 -10    9.68    1.02
 -12   4 -10    0.84    0.49
 -10   4 -10   10.82    1.04
  -8   4 -10   22.91    1.59
  -6   4 -10    7.52    0.85
  -4   4 -10    7.29    0.47
  -2   4 -10   16.59    1.26
   0   4 -10    1.67    0.30
   2   4 -10   22.99    0.77
   4   4 -10    1.08    0.26
   6   4 -10    2.47    0.29
   8   4 -10    0.49    0.23
  10   4 -10    2.42    0.29
  12   4 -10    0.37    0.31
  14   4 -10    2.85    0.51
  16   4 -10    4.84    0.62
  18   4 -10    4.15    0.62
  20   4 -10   13.37    1.04
  22   4 -10   18.06    1.31
  24   4 -10    0.19    0.40
  26   4 -10   36.65    2.21
  28   4 -10    5.29    0.87
 -23   5 -10    1.26    0.76
 -21   5 -10    4.32    0.97
 -19   5 -10    1.60    0.75
 -17   5 -10    0.04    0.52
 -15   5 -10    0.89    0.53
 -13   5 -10    1.11    0.57
 -11   5 -10   -0.53    0.38
  -9   5 -10   14.95    1.25
  -7   5 -10   36.23    2.21
  -5   5 -10   30.83    1.27
  -3   5 -10    4.78    0.78
  -1   5 -10    2.56    0.45
   1   5 -10   -0.33    0.23
   3   5 -10    2.80    0.36
   5   5 -10    6.98    0.46
   7   5 -10    2.75    0.31
   9   5 -10   30.41    1.60
  15   5 -10    1.94    0.50
  17   5 -10    7.43    0.82
  19   5 -10    2.04    0.51
  21   5 -10   -0.31    0.35
  23   5 -10    3.77    0.72
  25   5 -10    3.58    0.72
  27   5 -10    4.62    0.84
 -22   6 -10    3.26    1.00
 -20   6 -10    6.69    1.15
 -18   6 -10   15.55    1.55
 -16   6 -10    0.44    0.56
 -14   6 -10    6.55    0.99
 -12   6 -10    9.86    1.11
 -10   6 -10   20.20    1.61
  -8   6 -10    5.31    0.81
  -6   6 -10    8.46    0.99
  -4   6 -10    7.52    0.94
  -2   6 -10   12.03    0.85
   0   6 -10   39.74    1.53
   2   6 -10    0.12    0.26
   4   6 -10    0.91    0.36
   6   6 -10    4.09    0.55
   8   6 -10   -0.08    0.28
  10   6 -10    1.80    0.45
  14   6 -10    4.71    0.66
  16   6 -10    0.98    0.43
  18   6 -10    3.72    0.65
  20   6 -10   -0.47    0.33
  22   6 -10    0.38    0.43
  24   6 -10    2.53    0.64
 -19   7 -10    1.16    0.71
 -17   7 -10    2.62    0.87
 -15   7 -10    0.72    0.62
 -13   7 -10    0.39    0.58
 -11   7 -10   -0.03    0.51
  -9   7 -10    0.31    0.54
  -7   7 -10   26.55    1.97
  -5   7 -10   12.13    1.23
  -3   7 -10   33.14    2.22
  -1   7 -10   59.13    3.33
   1   7 -10    0.94    0.29
   3   7 -10   90.41    3.14
   5   7 -10    0.39    0.34
   7   7 -10    8.95    0.82
   9   7 -10   51.89    2.61
  11   7 -10   15.88    1.12
  13   7 -10    3.47    0.62
  15   7 -10    1.69    0.50
  17   7 -10   -0.07    0.37
  19   7 -10    0.51    0.42
  21   7 -10    0.96    0.51
  23   7 -10    3.06    0.74
 -18   8 -10    7.16    1.26
 -16   8 -10    7.83    1.18
 -14   8 -10    2.10    0.84
 -12   8 -10    5.69    1.03
 -10   8 -10    1.98    0.73
  -8   8 -10    8.63    1.13
  -4   8 -10    8.28    1.04
  -2   8 -10    2.13    0.71
   0   8 -10    2.15    0.65
   2   8 -10    0.38    0.29
   4   8 -10   -0.17    0.33
   6   8 -10    1.11    0.44
   8   8 -10    4.88    0.69
  10   8 -10    0.78    0.42
  12   8 -10   -0.09    0.41
  14   8 -10    0.47    0.41
  16   8 -10    1.70    0.60
  18   8 -10   -0.08    0.45
 -13   9 -10    0.51    0.68
 -11   9 -10    0.08    0.57
  -9   9 -10    1.55    0.74
  -7   9 -10    0.22    0.53
  -5   9 -10    0.03    0.51
  -3   9 -10    1.30    0.64
  -1   9 -10   -0.34    0.46
   1   9 -10    5.12    0.94
   5   9 -10    0.90    0.46
   7   9 -10    2.09    0.58
   9   9 -10    2.02    0.61
  11   9 -10    2.42    0.62
  13   9 -10    6.15    0.89
  15   9 -10    1.19    0.57
  -8  10 -10    0.00    0.56
  -6  10 -10   18.05    1.72
  -4  10 -10   -0.09    0.60
  -2  10 -10    1.63    0.69
   0  10 -10   13.96    1.49
   8  10 -10    2.03    0.66
  10  10 -10    0.12    0.48
  12  10 -10    1.82    0.64
  -6 -10  -9    8.04    1.31
  -4 -10  -9    0.30    0.77
  -2 -10  -9   -0.99    0.65
   0 -10  -9    0.66    0.76
   2 -10  -9    1.58    0.87
 -13  -9  -9    0.84    0.76
 -11  -9  -9    2.68    0.95
  -9  -9  -9    5.06    1.01
  -7  -9  -9    4.57    0.99
  -5  -9  -9    8.65    1.21
  -3  -9  -9    1.59    0.82
  -1  -9  -9    1.27    0.70
  11  -9  -9    0.66    0.63
  13  -9  -9    4.90    0.96
  15  -9  -9    9.33    1.22
  17  -9  -9    0.77    0.73
 -18  -8  -9    5.93    1.16
 -16  -8  -9    2.84    0.92
 -14  -8  -9    8.94    1.25
 -12  -8  -9    1.65    0.75
 -10  -8  -9   -1.00    0.49
  -8  -8  -9    5.86    0.98
  -6  -8  -9    0.25    0.57
  -4  -8  -9    1.32    0.66
  -2  -8  -9    4.40    0.87
   6  -8  -9    8.32    0.96
   8  -8  -9   -0.09    0.57
  10  -8  -9    0.73    0.63
  12  -8  -9    3.94    0.83
  14  -8  -9    1.73    0.70
  16  -8  -9    3.39    0.87
  18  -8  -9    2.05    0.80
  20  -8  -9    0.46    0.66
 -19  -7  -9    0.57    0.77
 -17  -7  -9    0.81    0.71
 -15  -7  -9    0.28    0.63
 -13  -7  -9    2.49    0.78
 -11  -7  -9    2.31    0.71
  -9  -7  -9   12.61    1.23
  -7  -7  -9   13.39    1.29
  -5  -7  -9    5.78    0.90
  -3  -7  -9    2.87    0.74
  -1  -7  -9    0.22    0.58
   3  -7  -9   16.20    1.25
   5  -7  -9    0.51    0.55
   7  -7  -9   11.45    1.11
   9  -7  -9    5.28    0.79
  11  -7  -9    4.01    0.79
  13  -7  -9    0.72    0.58
  15  -7  -9    0.43    0.60
  17  -7  -9    1.58    0.72
  19  -7  -9    0.76    0.69
  21  -7  -9    2.74    0.90
 -20  -6  -9    0.52    0.73
 -18  -6  -9    2.96    0.84
 -16  -6  -9    3.20    0.81
 -14  -6  -9   10.90    1.23
 -12  -6  -9   -0.01    0.51
 -10  -6  -9    9.13    1.06
  -8  -6  -9    2.01    0.67
  -6  -6  -9   92.87    4.82
  -4  -6  -9    5.40    0.84
  -2  -6  -9    1.30    0.58
   0  -6  -9   27.37    1.55
   2  -6  -9   26.72    1.51
   4  -6  -9    5.16    0.69
   6  -6  -9   15.12    1.19
   8  -6  -9   15.66    1.23
  10  -6  -9   32.60    2.09
  12  -6  -9    0.88    0.57
  14  -6  -9    7.40    0.95
  16  -6  -9    0.15    0.53
  18  -6  -9    0.87    0.64
  20  -6  -9   -0.50    0.51
  22  -6  -9    0.30    0.64
  24  -6  -9   -0.35    0.63
 -23  -5  -9    3.06    1.05
 -19  -5  -9   25.76    1.96
 -17  -5  -9   -0.11    0.55
 -15  -5  -9   32.40    2.05
 -13  -5  -9    2.91    0.71
 -11  -5  -9   -0.28    0.50
  -9  -5  -9   -0.41    0.50
  -7  -5  -9   35.73    2.06
  -5  -5  -9    0.72    0.51
  -3  -5  -9    4.17    0.35
  -1  -5  -9   10.29    0.75
   1  -5  -9   25.39    1.39
   3  -5  -9    7.95    0.77
   5  -5  -9   13.19    1.01
   7  -5  -9   10.83    0.99
   9  -5  -9    7.24    0.83
  11  -5  -9   79.05    3.93
  13  -5  -9   27.11    1.80
  15  -5  -9    3.95    0.78
  17  -5  -9    0.86    0.60
  19  -5  -9    2.12    0.71
  21  -5  -9    0.96    0.65
  23  -5  -9    4.57    0.94
  25  -5  -9    0.47    0.70
  27  -5  -9   -0.10    0.69
 -26  -4  -9    2.54    1.04
 -24  -4  -9    0.47    0.76
 -22  -4  -9    2.05    0.85
 -20  -4  -9   -0.28    0.68
 -16  -4  -9   15.32    1.36
 -14  -4  -9   24.64    1.75
 -12  -4  -9    4.18    0.76
 -10  -4  -9   45.87    2.57
  -8  -4  -9   27.41    1.73
  -6  -4  -9    1.41    0.51
  -4  -4  -9    5.86    0.37
  -2  -4  -9   -0.01    0.19
   0  -4  -9   12.55    0.83
   2  -4  -9   25.38    1.41
   4  -4  -9    5.55    0.62
   6  -4  -9    0.29    0.38
   8  -4  -9   -0.29    0.39
  10  -4  -9    6.63    0.76
  12  -4  -9    7.50    0.85
  14  -4  -9    7.11    0.90
  16  -4  -9    0.81    0.57
  18  -4  -9    0.55    0.54
  20  -4  -9    1.33    0.65
  22  -4  -9    1.16    0.65
  24  -4  -9   -0.32    0.59
  26  -4  -9    2.32    0.85
  28  -4  -9    0.14    0.70
 -27  -3  -9    2.70    0.97
 -25  -3  -9    2.31    0.95
 -23  -3  -9    0.49    0.72
 -21  -3  -9    0.42    0.70
 -19  -3  -9    1.15    0.72
 -17  -3  -9   87.24    4.63
 -15  -3  -9    2.67    0.71
 -13  -3  -9   78.05    4.07
 -11  -3  -9   23.53    1.51
  -9  -3  -9   16.75    1.18
  -7  -3  -9    0.90    0.15
  -5  -3  -9   81.89    2.67
  -3  -3  -9   51.51    1.80
  -1  -3  -9   46.73    1.61
   1  -3  -9   25.59    1.34
   3  -3  -9   23.22    1.37
   5  -3  -9   20.96    1.33
   7  -3  -9   96.63    4.81
   9  -3  -9    2.18    0.51
  11  -3  -9   37.14    2.15
  13  -3  -9   43.37    2.45
  15  -3  -9   14.85    1.24
  17  -3  -9   47.71    2.73
  19  -3  -9   19.70    1.48
  21  -3  -9   18.16    1.52
  23  -3  -9    1.37    0.68
  25  -3  -9    4.33    0.94
  27  -3  -9    1.76    0.76
  29  -3  -9    6.75    1.11
 -28  -2  -9    1.84    0.90
 -26  -2  -9   12.21    1.54
 -24  -2  -9    0.02    0.68
 -22  -2  -9    7.17    1.15
 -20  -2  -9    1.09    0.67
 -18  -2  -9    4.30    0.92
 -16  -2  -9    5.48    0.85
 -14  -2  -9   10.32    1.06
 -10  -2  -9    0.37    0.45
  -8  -2  -9  106.20    3.44
  -6  -2  -9    2.83    0.23
  -4  -2  -9   20.67    0.80
  -2  -2  -9    3.00    0.25
   0  -2  -9    5.29    0.45
   2  -2  -9   85.81    3.83
   4  -2  -9   12.13    0.86
   6  -2  -9   27.50    1.63
   8  -2  -9   -0.93    0.30
  10  -2  -9    7.21    0.76
  12  -2  -9   63.51    3.27
  14  -2  -9    4.85    0.70
  16  -2  -9    7.26    0.85
  18  -2  -9    2.88    0.71
  20  -2  -9    0.50    0.59
  22  -2  -9   -0.68    0.48
  24  -2  -9    1.71    0.70
  26  -2  -9    3.23    0.82
  28  -2  -9    1.16    0.67
 -27  -1  -9    1.00    0.77
 -25  -1  -9   -0.04    0.60
 -23  -1  -9   10.54    1.29
 -21  -1  -9   -0.36    0.49
 -19  -1  -9   81.58    4.73
 -17  -1  -9    4.08    0.79
 -15  -1  -9   12.97    1.14
 -13  -1  -9    0.00    0.51
 -11  -1  -9    2.16    0.57
  -9  -1  -9   20.69    1.32
  -7  -1  -9   22.70    1.10
  -5  -1  -9    0.22    0.15
  -3  -1  -9   16.01    0.62
  -1  -1  -9   15.31    0.58
   1  -1  -9   41.91    1.92
   3  -1  -9    1.74    0.35
   5  -1  -9  115.55    5.68
   7  -1  -9   -0.04    0.33
   9  -1  -9  100.54    4.86
  11  -1  -9   23.58    1.41
  13  -1  -9    0.70    0.20
  15  -1  -9    8.71    0.51
  17  -1  -9   11.45    0.94
  19  -1  -9   11.17    1.09
  21  -1  -9   19.10    1.40
  23  -1  -9    1.33    0.59
  25  -1  -9    3.37    0.78
 -28   0  -9    0.92    0.82
 -26   0  -9    0.06    0.68
 -24   0  -9    1.56    0.72
 -22   0  -9   -0.38    0.54
 -20   0  -9    1.24    0.61
 -18   0  -9    1.09    0.63
 -16   0  -9    0.76    0.51
 -14   0  -9    0.53    0.48
 -12   0  -9    0.42    0.49
 -10   0  -9    0.57    0.49
  -8   0  -9    0.24    0.41
  -6   0  -9   -0.02    0.17
  -4   0  -9    0.19    0.17
  -2   0  -9   -0.07    0.15
   0   0  -9    0.22    0.19
   2   0  -9   -0.19    0.20
   4   0  -9   -0.27    0.23
   6   0  -9   -0.08    0.14
   8   0  -9   -0.14    0.15
  10   0  -9   -0.10    0.34
  12   0  -9   -0.15    0.14
  14   0  -9    0.04    0.19
  16   0  -9   -0.08    0.18
  18   0  -9    0.41    0.20
  20   0  -9    0.63    0.25
  22   0  -9    1.63    0.51
  24   0  -9   -0.10    0.44
 -27   1  -9    1.43    0.83
 -25   1  -9    0.20    0.65
 -23   1  -9    8.17    1.16
 -21   1  -9   -0.25    0.55
 -19   1  -9   88.04    4.79
 -17   1  -9    2.42    0.69
 -15   1  -9   10.35    1.09
 -13   1  -9    0.07    0.44
 -11   1  -9    2.69    0.61
  -9   1  -9   18.62    1.27
  -7   1  -9   18.10    1.26
  -5   1  -9    0.18    0.19
  -3   1  -9   15.32    0.65
  -1   1  -9   12.87    0.58
   1   1  -9   38.12    1.35
   3   1  -9    2.68    0.22
   5   1  -9  124.46    3.87
   7   1  -9    0.08    0.15
   9   1  -9  103.48    3.28
  11   1  -9   22.13    0.86
  13   1  -9    1.19    0.23
  15   1  -9    9.34    0.53
  17   1  -9   12.71    0.63
  19   1  -9   11.76    0.65
  21   1  -9   16.74    1.15
 -28   2  -9    3.25    1.01
 -26   2  -9    9.73    1.43
 -24   2  -9    0.77    0.73
 -22   2  -9    9.48    1.19
 -20   2  -9    3.16    0.78
 -18   2  -9    5.25    0.90
 -16   2  -9    3.77    0.75
 -14   2  -9   10.51    1.00
 -12   2  -9    0.97    0.52
 -10   2  -9    0.43    0.45
  -6   2  -9    2.17    0.49
  -4   2  -9   19.74    0.87
  -2   2  -9    2.96    0.31
   0   2  -9    5.07    0.28
   2   2  -9   80.43    2.16
   4   2  -9   12.76    0.56
   6   2  -9   30.92    1.07
   8   2  -9   -0.16    0.16
  10   2  -9    7.14    0.41
  12   2  -9   62.44    2.14
  14   2  -9    3.41    0.33
  16   2  -9    5.19    0.41
  18   2  -9    3.72    0.51
  20   2  -9    1.33    0.43
  22   2  -9    0.13    0.35
  24   2  -9    0.50    0.40
 -27   3  -9    2.83    1.01
 -25   3  -9    2.78    0.99
 -23   3  -9    1.94    0.82
 -21   3  -9   -0.01    0.56
 -19   3  -9    1.64    0.69
 -17   3  -9   88.34    4.68
 -15   3  -9    1.99    0.63
 -13   3  -9   77.96    4.15
 -11   3  -9   19.72    1.46
  -9   3  -9   12.97    1.10
  -7   3  -9    0.21    0.45
  -5   3  -9   72.81    4.01
  -3   3  -9   50.81    1.79
  -1   3  -9   43.22    1.65
   1   3  -9   24.43    0.78
   3   3  -9   24.94    0.78
   5   3  -9   24.44    0.88
   7   3  -9  105.07    3.24
   9   3  -9    2.53    0.26
  11   3  -9   40.37    1.37
  13   3  -9   45.32    1.56
  15   3  -9   17.04    1.06
  17   3  -9   50.47    2.47
  19   3  -9   18.18    1.22
  21   3  -9   21.23    1.36
  23   3  -9    1.00    0.45
  25   3  -9    4.87    0.74
  27   3  -9    0.09    0.45
 -26   4  -9    3.08    0.99
 -24   4  -9   -0.09    0.70
 -22   4  -9    2.34    0.85
 -20   4  -9   -0.06    0.51
 -18   4  -9    1.66    0.65
 -16   4  -9   14.88    1.35
 -14   4  -9   22.94    1.72
 -12   4  -9    4.82    0.74
 -10   4  -9   43.53    2.58
  -8   4  -9   25.13    1.72
  -6   4  -9    1.71    0.51
  -4   4  -9    6.47    0.41
  -2   4  -9    0.48    0.27
   0   4  -9   11.82    0.81
   2   4  -9   25.21    0.82
   4   4  -9    5.63    0.39
   6   4  -9   -0.13    0.19
   8   4  -9   -0.04    0.18
  10   4  -9    6.08    0.39
  12   4  -9    6.68    0.65
  14   4  -9    7.52    0.73
  18   4  -9   -0.74    0.27
  20   4  -9    1.09    0.41
  22   4  -9   -0.03    0.33
  24   4  -9   -0.43    0.30
  26   4  -9    1.86    0.59
  28   4  -9    2.72    0.72
 -25   5  -9    4.64    1.10
 -23   5  -9    4.25    1.05
 -21   5  -9   12.89    1.47
 -19   5  -9   26.95    2.01
 -17   5  -9    0.40    0.56
 -15   5  -9   27.34    1.98
 -13   5  -9    4.48    0.79
 -11   5  -9    0.41    0.48
  -9   5  -9    0.11    0.42
  -7   5  -9   31.84    2.06
  -5   5  -9   -0.02    0.24
  -3   5  -9    4.16    0.39
  -1   5  -9   11.48    0.80
   1   5  -9   23.21    1.01
   3   5  -9    6.98    0.50
   5   5  -9   12.38    0.87
   7   5  -9   11.48    0.86
   9   5  -9    5.70    0.62
  11   5  -9   83.01    3.70
  13   5  -9   26.24    1.59
  15   5  -9    4.14    0.64
  19   5  -9    3.16    0.59
  21   5  -9    1.01    0.45
  23   5  -9    2.16    0.64
  25   5  -9    1.44    0.55
  27   5  -9    0.19    0.49
 -22   6  -9    0.78    0.73
 -20   6  -9    2.25    0.87
 -18   6  -9    3.82    0.95
 -16   6  -9    1.59    0.68
 -14   6  -9   14.40    1.37
 -12   6  -9    0.16    0.46
 -10   6  -9    9.88    1.07
  -8   6  -9    2.87    0.66
  -6   6  -9   94.22    4.94
  -4   6  -9    4.71    0.80
  -2   6  -9    1.52    0.38
   0   6  -9   29.03    1.14
   2   6  -9   23.86    1.05
   4   6  -9    3.93    0.54
   8   6  -9   11.95    0.94
  10   6  -9   35.65    1.95
  12   6  -9    0.55    0.40
  14   6  -9    7.46    0.81
  18   6  -9    1.07    0.45
  20   6  -9   -0.41    0.34
  22   6  -9    0.40    0.44
  24   6  -9   -0.15    0.41
 -21   7  -9    0.37    0.72
 -19   7  -9    0.56    0.69
 -17   7  -9   -0.49    0.56
 -15   7  -9    0.32    0.54
 -13   7  -9    2.60    0.75
 -11   7  -9    1.46    0.61
  -9   7  -9   13.14    1.27
  -7   7  -9   12.84    1.30
  -5   7  -9    6.91    0.93
  -3   7  -9    3.16    0.71
  -1   7  -9   -0.04    0.41
   1   7  -9   -0.18    0.22
   3   7  -9   17.70    0.89
   5   7  -9    1.54    0.44
  11   7  -9    2.04    0.51
  17   7  -9    2.92    0.64
  19   7  -9    1.14    0.52
  21   7  -9    4.67    0.80
  23   7  -9   -0.44    0.37
 -18   8  -9    4.35    1.10
 -16   8  -9    1.45    0.75
 -14   8  -9    8.13    1.22
 -12   8  -9    1.95    0.71
 -10   8  -9    0.74    0.53
  -8   8  -9    5.29    0.94
  -4   8  -9    0.92    0.57
  -2   8  -9    2.83    0.77
   0   8  -9   15.68    1.45
   2   8  -9   23.93    1.14
   4   8  -9    5.90    0.70
   6   8  -9    6.66    0.77
   8   8  -9    0.06    0.38
  10   8  -9    1.26    0.46
  12   8  -9    3.04    0.65
  14   8  -9    1.71    0.54
  16   8  -9    4.14    0.74
  18   8  -9    1.74    0.65
 -13   9  -9   -0.97    0.56
 -11   9  -9    1.52    0.75
  -7   9  -9    4.23    0.90
  -5   9  -9    9.02    1.21
  -3   9  -9    1.69    0.71
  -1   9  -9    0.66    0.56
   1   9  -9    3.71    0.83
   5   9  -9    1.79    0.55
   7   9  -9    3.50    0.67
   9   9  -9    0.08    0.43
  11   9  -9   -0.08    0.44
  13   9  -9    3.80    0.75
  15   9  -9    6.20    0.93
  -8  10  -9    1.36    0.79
  -6  10  -9    8.86    1.23
  -4  10  -9   -0.89    0.47
  -2  10  -9   -0.85    0.50
   0  10  -9    0.34    0.55
   8  10  -9    0.00    0.44
  10  10  -9    7.38    0.94
  12  10  -9    0.43    0.57
  -8 -10  -8    1.84    0.91
  -6 -10  -8    4.80    1.10
  -4 -10  -8   -1.13    0.66
  -2 -10  -8    0.43    0.78
   0 -10  -8    0.38    0.74
 -13  -9  -8    4.96    1.09
 -11  -9  -8   31.56    2.34
  -9  -9  -8    1.94    0.81
  -7  -9  -8   19.20    1.74
  -5  -9  -8    8.55    1.20
  -3  -9  -8    1.67    0.82
  -1  -9  -8    4.45    0.98
  11  -9  -8    0.78    0.67
  13  -9  -8    0.43    0.66
  15  -9  -8    3.34    0.92
  17  -9  -8    0.94    0.79
 -18  -8  -8    0.95    0.80
 -16  -8  -8    1.05    0.79
 -14  -8  -8   -0.63    0.63
 -12  -8  -8    6.49    1.04
 -10  -8  -8    2.92    0.80
  -8  -8  -8    0.71    0.63
  -6  -8  -8   -0.11    0.57
  -4  -8  -8    1.37    0.72
  -2  -8  -8    1.45    0.67
   6  -8  -8   11.81    1.11
   8  -8  -8   -0.47    0.48
  10  -8  -8    2.03    0.72
  12  -8  -8    0.22    0.59
  14  -8  -8   -0.66    0.52
  16  -8  -8    1.45    0.74
  18  -8  -8    1.32    0.73
  20  -8  -8    5.03    1.05
 -21  -7  -8    2.72    1.00
 -19  -7  -8    1.67    0.81
 -17  -7  -8    0.43    0.68
 -15  -7  -8    0.32    0.64
 -13  -7  -8    0.31    0.57
 -11  -7  -8    5.90    0.93
  -9  -7  -8    4.63    0.82
  -7  -7  -8    3.76    0.78
  -5  -7  -8   15.06    1.35
  -3  -7  -8   22.58    1.71
  -1  -7  -8    4.46    0.85
   3  -7  -8   37.64    2.08
   5  -7  -8   11.58    1.07
   7  -7  -8    0.71    0.55
   9  -7  -8   -0.46    0.45
  11  -7  -8    4.95    0.84
  13  -7  -8   -0.18    0.52
  15  -7  -8   -0.03    0.56
  17  -7  -8    1.58    0.72
  19  -7  -8    0.15    0.66
  21  -7  -8   -0.51    0.61
 -20  -6  -8    0.77    0.76
 -18  -6  -8    5.77    1.00
 -16  -6  -8    1.96    0.75
 -14  -6  -8    1.15    0.66
 -12  -6  -8   10.04    1.09
 -10  -6  -8    8.34    1.00
  -8  -6  -8    1.39    0.59
  -6  -6  -8   68.41    3.62
  -4  -6  -8    7.85    0.94
  -2  -6  -8   25.50    1.68
   0  -6  -8   18.83    1.16
   2  -6  -8    0.88    0.45
   4  -6  -8    3.72    0.62
   6  -6  -8   10.12    0.99
   8  -6  -8   30.36    1.92
  10  -6  -8    2.25    0.65
  12  -6  -8   64.51    3.40
  14  -6  -8   12.18    1.22
  16  -6  -8   10.29    1.17
  18  -6  -8   18.76    1.63
  20  -6  -8   -0.15    0.55
  22  -6  -8   31.65    2.23
  24  -6  -8    0.26    0.71
 -25  -5  -8   -0.15    0.82
 -23  -5  -8    0.02    0.82
 -19  -5  -8   -0.11    0.63
 -17  -5  -8    0.58    0.60
 -15  -5  -8    5.40    0.89
 -13  -5  -8   17.39    1.44
 -11  -5  -8   79.46    4.26
  -9  -5  -8    5.45    0.83
  -7  -5  -8   55.48    2.99
  -5  -5  -8   59.87    3.19
  -3  -5  -8    1.87    0.27
  -1  -5  -8   14.03    0.90
   1  -5  -8    9.91    0.80
   3  -5  -8   31.84    1.79
   5  -5  -8    0.04    0.40
   7  -5  -8   42.63    2.31
   9  -5  -8    8.06    0.88
  15  -5  -8    2.34    0.69
  17  -5  -8    0.04    0.53
  19  -5  -8    1.54    0.68
  21  -5  -8    1.59    0.73
  23  -5  -8    6.44    1.08
  25  -5  -8    0.87    0.76
  27  -5  -8    2.15    0.91
 -26  -4  -8   -0.18    0.83
 -24  -4  -8    0.42    0.73
 -22  -4  -8    5.30    1.05
 -20  -4  -8    0.86    0.72
 -18  -4  -8    1.04    0.67
 -16  -4  -8   26.23    1.87
 -14  -4  -8   16.17    1.34
 -12  -4  -8   10.12    1.03
 -10  -4  -8   70.09    3.60
  -8  -4  -8    9.07    0.92
  -6  -4  -8   22.58    1.52
  -4  -4  -8    3.54    0.27
  -2  -4  -8   39.23    1.41
   0  -4  -8   29.62    1.52
   2  -4  -8   -0.10    0.31
   4  -4  -8   15.98    1.01
   6  -4  -8   24.43    1.54
   8  -4  -8    1.56    0.49
  10  -4  -8   15.74    1.20
  14  -4  -8    2.85    0.67
  16  -4  -8   13.72    1.25
  18  -4  -8    2.56    0.69
  20  -4  -8   14.84    1.37
  22  -4  -8    0.30    0.64
  24  -4  -8    3.60    0.90
  26  -4  -8    0.11    0.69
  28  -4  -8   -0.11    0.69
 -27  -3  -8    3.62    1.11
 -25  -3  -8    3.25    1.00
 -23  -3  -8    1.54    0.79
 -21  -3  -8    6.12    1.06
 -19  -3  -8    3.25    0.89
 -17  -3  -8    5.21    0.87
 -15  -3  -8    5.75    0.88
 -13  -3  -8    9.73    1.03
 -11  -3  -8    1.95    0.57
  -9  -3  -8   29.03    1.73
  -7  -3  -8   19.09    0.73
  -5  -3  -8    0.07    0.12
  -3  -3  -8    5.62    0.34
  -1  -3  -8    3.00    0.34
   1  -3  -8    2.91    0.38
   3  -3  -8   50.36    2.36
   5  -3  -8   39.88    2.03
   7  -3  -8    7.94    0.75
   9  -3  -8   33.87    1.95
  11  -3  -8   14.93    1.13
  13  -3  -8   17.40    1.28
  15  -3  -8    9.98    1.02
  17  -3  -8   43.81    2.33
  19  -3  -8    3.58    0.77
  21  -3  -8    5.49    0.88
  23  -3  -8    0.41    0.63
  25  -3  -8   -0.07    0.64
  27  -3  -8   -0.11    0.61
  29  -3  -8    0.42    0.69
 -28  -2  -8    6.46    1.29
 -26  -2  -8    7.26    1.24
 -24  -2  -8    3.63    0.94
 -22  -2  -8   -0.60    0.55
 -20  -2  -8    0.85    0.62
 -18  -2  -8    1.55    0.67
 -16  -2  -8    0.37    0.57
 -14  -2  -8    9.18    1.00
 -10  -2  -8   18.46    1.27
  -8  -2  -8   -0.05    0.12
  -6  -2  -8   25.75    0.94
  -4  -2  -8    0.97    0.16
  -2  -2  -8    0.25    0.16
   0  -2  -8  102.09    4.58
   2  -2  -8   55.02    2.64
   4  -2  -8   14.34    1.00
   6  -2  -8    1.89    0.46
   8  -2  -8   19.25    1.27
  10  -2  -8    0.30    0.43
  12  -2  -8   13.98    1.16
  14  -2  -8   29.52    1.80
  16  -2  -8    4.26    0.73
  18  -2  -8   20.80    1.52
  20  -2  -8    7.02    0.96
  22  -2  -8    0.28    0.56
  24  -2  -8    0.10    0.59
  26  -2  -8    3.22    0.84
  28  -2  -8    0.05    0.65
 -27  -1  -8    6.01    1.18
 -25  -1  -8    5.40    1.08
 -23  -1  -8   22.79    1.88
 -21  -1  -8    3.59    0.85
 -19  -1  -8   33.22    2.27
 -17  -1  -8    0.39    0.56
 -15  -1  -8   -0.26    0.50
 -13  -1  -8    4.16    0.67
 -11  -1  -8    1.48    0.53
  -9  -1  -8   54.29    2.95
  -7  -1  -8   54.13    2.47
  -5  -1  -8   23.63    0.87
  -3  -1  -8    0.16    0.15
  -1  -1  -8   31.93    1.03
   1  -1  -8  108.91    4.69
   3  -1  -8    0.12    0.27
   5  -1  -8   19.40    1.24
   7  -1  -8    0.49    0.36
   9  -1  -8    4.78    0.63
  11  -1  -8   13.36    0.61
  13  -1  -8   -0.01    0.14
  15  -1  -8   18.24    0.81
  17  -1  -8    4.13    0.36
  19  -1  -8    0.65    0.55
  21  -1  -8    6.87    0.90
  23  -1  -8    0.71    0.56
  25  -1  -8    2.35    0.74
 -28   0  -8    3.66    1.08
 -26   0  -8    2.32    0.94
 -24   0  -8    4.67    0.96
 -22   0  -8    0.04    0.54
 -20   0  -8   32.48    2.22
 -18   0  -8   23.74    1.74
 -16   0  -8   56.52    3.23
 -14   0  -8   17.40    1.32
 -12   0  -8    6.11    0.73
 -10   0  -8    7.95    0.77
  -8   0  -8   71.31    3.58
[truncated: 548,451 more chars]
